# Supplementary material for: Comprehensive Whole Genome Sequencing Dataset of Mycobacterium tuberculosis Strains Collected Across Italy
Source: Springer Nature journal article supplement (doi:10.1038/s41597-025-04966-1), 2025-04-15
Supplement: MOESM1 [file 41597_2025_4966_MOESM1_ESM.xlsx]

## Sheet: Sheet1
																	Phenotypic drug susceptibility testing
Sample Name (identifiers represent unique labels assigned by the different collaborating centers involved in the study)	Accession Number	Year	Regione	Country of origine (Italian0, Foriegn born 1)	Pulmonary (0), Extrapulmonary (1)	HIV (0,No),(1,Yes)	Total.Reads	Mapped Reads to MTBC genome	% Mapped Reads to MTBC genome	Median Coverage	Uncovered (Missing Nucleotides)	Drug Resistance Type	Drug.Resistance.Variants	lineage	lineage_name	Cluster ( 5 SNP threshold)	INH (0.1 mg/L)	RIF	EMB	PZA	INH (0.4 mg/L)	AMK	MOXI (0.25 mg/L)	ETH	LZD	CFZ	DLM	BDQ
2017FPG002	SRR31011455	2017	Lazio	Not available	1	Not available	2423290	2378139	98.14	119	35169	Pan-S		2.2.1	Beijing	group_101	S	S
2017FPG003	SRR31011454	2017	Lazio	Not available	0	1	3092887	3075359	99.43	152	34126	Pan-S		4.4.1.2	Euro-American	group_215	S	S	S	S
2017FPG006	SRR31011409	2017	Lazio	Not available	0	Not available	2713949	2705233	99.68	135	22363	Pan-S		4.8	mainly T	ungrouped	S	S	S	R
2017FPG009	SRR31011398	2017	Lazio	Not available	0	Not available	2761324	2746370	99.46	143	45236	Mono-Rif	rpoB:Ser450Leu	4.3.3	LAM	ungrouped	S	R	S	S
2017FPG011	SRR31011387	2017	Lazio	Not available	0	0	2622598	2606869	99.4	135	20242	Pan-S		4.1.2	Euro-American	group_124	S	S	S
2017FPG012	SRR31011376	2017	Lazio	Not available	0	0	3211167	3180424	99.04	98	15733	Pan-S		3	Delhi-CAS	group_247	S	S	S
2017FPG013	SRR31011365	2017	Lazio	Not available	0	0	2232985	2222075	99.51	114	35471	Mono-FQs	gyrA: Asp94Gly	2.2.1	Beijing	group_101	S	S	S
2017FPG014	SRR31011354	2017	Lazio	Not available	0	0	2167160	2158351	99.59	114	41801	Pan-S		4.6.2.2	Cameroon	ungrouped	S	S	R
2017FPG015	SRR31011343	2017	Lazio	Not available	0	0	3406427	3383221	99.32	128	16640	Pan-S		3	Delhi-CAS	group_247	S	S	S
2017FPG016	SRR31011332	2017	Lazio	Not available	1	Not available	16141001	15743953	97.54	714	4218	Pan-S		4.8	mainly T	ungrouped	S	S	S
2017FPG018	SRR31011453	2017	Lazio	Not available	0	0	2041508	1980457	97.01	104	14654	Other	embB:Met306Val	4.1.2	Euro-American	ungrouped	S	S	R
2017FPG019	SRR31011442	2017	Lazio	Not available	0	0	2178217	2171364	99.69	114	18547	Pan-S		4.8	mainly T	group_67	S	S	S
2017FPG020	SRR31011431	2017	Lazio	Not available	0	Not available	2778924	2757394	99.23	132	21968	Pan-S		4.1.2.1	Haarlem	ungrouped	S	S	R
2017FPG022	SRR31011420	2017	Lazio	Not available	0	0	980059	964492	98.41	36	29645	Pan-S		4.1.2.1	Haarlem	group_89	S	S	S
2017FPG023	SRR31011415	2017	Lazio	Not available	0	Not available	724588	707710	97.67	35	33444	Pan-S		4.1.2.1	Haarlem	ungrouped	S	S	S
2017FPG024	SRR31011414	2017	Lazio	Not available	0	Not available	2475419	2467148	99.67	118	63000	Pan-S		4.3.4.2	LAM	ungrouped	S	S	S
2017FPG029	SRR31011413	2017	Lazio	Not available	0	0	3481283	3461751	99.44	168	12735	Pan-S		3.1.1	Delhi-CAS	ungrouped	S	S	S
2017FPG031	SRR31011412	2017	Lazio	Not available	0	0	2147954	2137529	99.51	105	14096	Pan-S		3	Delhi-CAS	ungrouped	S	S	S
2017FPG033	SRR31011411	2017	Lazio	Not available	0	0	1704427	1688475	99.06	86	25351	Pan-S		4.1.2.1	Haarlem	ungrouped	S	S	S
2017FPG034	SRR31011410	2017	Lazio	Not available	0	0	2079415	2053982	98.78	99	30757	Pan-S		4.1.2.1	Haarlem	ungrouped	S	S	S
2017FPG040	SRR31011408	2017	Lazio	Not available	0	0	2770954	2756754	99.49	143	34357	Pan-S		4.4.1.1	S-type	group_265	S	S	S
2017FPG044	SRR31011407	2017	Lazio	Not available	0	0	2050946	855693	41.72	29	30997	Pan-S		4.3.3	LAM	ungrouped	S	S	S
2017FPG045	SRR31011406	2017	Lazio	Not available	0	0	812680	785163	96.61	26	20879	Pan-S		4.1.2.1	Haarlem	ungrouped	S	S	S
2017FPG047	SRR31011405	2017	Lazio	Not available	0	0	2568430	1582650	61.62	56	34409	Pan-S		2.2.1	Beijing	group_53	S	S	S
2017FPG050	SRR31011404	2017	Lazio	Not available	1	0	1863849	1827596	98.05	67	15381	Pan-S		4.1.1.1	X-type	ungrouped	S	S	S
2017FPG051	SRR31011403	2017	Lazio	Not available	1	Not available	1311974	1279915	97.56	45	28147	Pan-S		4.3.3	LAM	ungrouped	S	S	S
2017FPG052	SRR31011402	2017	Lazio	Not available	0	0	2033917	1490345	73.27	54	12050	Pan-S		4.8	mainly T	group_59	S	S	S
2017FPG053	SRR31011401	2017	Lazio	Not available	0	0	1099231	1086704	98.86	43	35291	Mono-FQs	gyrA: Asp94Gly	2.2.1	Beijing	group_101	S	S	S	R
2017FPG054	SRR31011400	2017	Lazio	Not available	0	0	1571447	1541733	98.11	46	21302	Pan-S		4.1.2.1	Haarlem	ungrouped	S	S	S
2017FPG056	SRR31011399	2017	Lazio	Not available	0	0	701428	690377	98.42	27	40541	Pan-S		4.3.3	LAM	ungrouped	S	S	S
2017FPG057	SRR31011397	2017	Lazio	Not available	0	0	748239	733021	97.97	26	23548	Pan-S		1.2.1	EAI Manila	ungrouped	S	S	S	S
2017FPG058	SRR31011396	2017	Lazio	Not available	0	0	825769	803407	97.29	26	30492	Pan-S		4.8	mainly T	ungrouped	S	S	S
2017FPG059	SRR31011395	2017	Lazio	Not available	0	0	816214	799939	98.01	29	22907	Other	rpsL:Lys43Arg	4.8	mainly T	ungrouped	S	S	S
2018FPG002	SRR31011394	2018	Lazio	Not available	0	0	1418690	1384193	97.57	49	15442	Pan-S		4.1.2	Euro-American	ungrouped	S	S	S
2018FPG004	SRR31011393	2018	Lazio	Not available	0	0	1100982	1089437	98.95	42	45533	Pan-S		4.3.3	LAM	group_149	S	S	R	R
2018FPG005	SRR31011392	2018	Lazio	Not available	0	0	677696	665869	98.25	26	26835	Pan-S		4.8	mainly T	ungrouped	S	S	S
2018FPG006	SRR31011391	2018	Lazio	Not available	0	1	1125218	1095736	97.38	38	55154	Pan-S		4.3.4.2	LAM	ungrouped	S	S	S	R
2018FPG011	SRR31011390	2018	Lazio	Not available	0	0	960637	931397	96.96	33	31620	Pan-S		4.8	mainly T	group_193	S	S	S
2018FPG012	SRR31011389	2018	Lazio	Not available	0	0	723092	692308	95.74	30	29413	Pan-S		4.8	mainly T	ungrouped	S	S	S	R
2018FPG013	SRR31011388	2018	Lazio	Not available	0	1	1428887	1371008	95.95	49	20754	Pan-S		3	Delhi-CAS	ungrouped	S	S	S
2018FPG014	SRR31011386	2018	Lazio	Not available	0	0	958815	943655	98.42	34	19751	Pan-S		1.2.1	EAI Manila	ungrouped	S	S	S	R
2018FPG015	SRR31011385	2018	Lazio	Not available	0	0	1580722	1523025	96.35	52	19199	Mono-INH	fabG1_ups:C-15T- 1673425	4.8	mainly T	ungrouped	R	S	S	R
2018FPG016	SRR31011384	2018	Lazio	Not available	0	0	966991	938385	97.04	31	36550	Pan-S		2.2.1	Beijing	group_101	S	S	S	R
2018FPG017	SRR31011383	2018	Lazio	Not available	0	0	762339	732465	96.08	24	34838	Pan-S		1.2.2	EAI	group_161	S	S	S	R
2018FPG018	SRR31011382	2018	Lazio	Not available	0	0	874091	842105	96.34	26	33182	Other	rpsL:Lys43Arg	2.2.1	Beijing	ungrouped	R	S	S
2018FPG020	SRR31011381	2018	Lazio	Not available	0	0	3886395	3639542	93.65	122	4697	Mixed (Pan-S/MDR)	fabG1_ups:C-15T- 1673425 (14.9%), rpoB: Ser450Leu (6.7%)	4.1.2.1	Haarlem	group_89	R	R	S
2018FPG021	SRR31011380	2018	Lazio	Not available	0	0	1126493	1095696	97.27	37	23074	Other	rpsL:Lys43Arg	4.1.2.1	Haarlem	ungrouped	S	S	R	R
2018FPG022	SRR31011379	2018	Lazio	Not available	0	0	1105754	1060166	95.88	40	28446	Pan-S		4.1.2.1	Haarlem	group_135	S	S	S
2018FPG023	SRR31011378	2018	Lazio	Not available	0	1	1618793	1575474	97.32	61	31341	Other	rpsL:Lys88Arg	2.2.1	Beijing	ungrouped	S	S	R
2018FPG024	SRR31011377	2018	Lazio	Not available	0	0	814387	801585	98.43	31	23424	Pan-S		4.8	mainly T	ungrouped	S	S	S	R
2018FPG025	SRR31011375	2018	Lazio	Not available	0	0	940538	898887	95.57	38	32006	Other	pncA:Phe58Leu	4.1.2.1	Haarlem	group_112	S	S	S
2018FPG026	SRR31011374	2018	Lazio	Not available	0	0	1195753	1154224	96.53	47	19757	Other	rpsL:Lys88Arg	3	Delhi-CAS	ungrouped	S	S	S
2018FPG027	SRR31011373	2018	Lazio	Not available	0	0	942286	913489	96.94	38	25837	Pan-S		4.4.1.1	S-type	ungrouped	S	S	S
2018FPG028	SRR31011372	2018	Lazio	Not available	0	1	839046	819705	97.69	35	38591	Pan-S		4.4.1.2	Euro-American	group_215	S	S	S
2018FPG030	SRR31011371	2018	Lazio	Not available	0	Not available	965585	927756	96.08	39	22941	Pan-S		1.2.1	EAI Manila	ungrouped	S	S	S
2018FPG031	SRR31011370	2018	Lazio	Not available	0	0	1034912	995497	96.19	42	33065	Pan-S		1.1.2	EAI	ungrouped	S	S	S
2018FPG032	SRR31011369	2018	Lazio	Not available	0	0	1292824	1233351	95.4	50	23691	Pan-S		3	Delhi-CAS	ungrouped	S	S	S
2018FPG034	SRR31011368	2018	Lazio	Not available	0	0	2722657	2712674	99.63	126	27061	Pan-S		4.8	mainly T	ungrouped	S	S	S
2018FPG035	SRR31011367	2018	Lazio	Not available	0	0	610170	585993	96.04	25	23945	Mono-INH	fabG1_ups:C-15T- 1673425	1.2.1	EAI Manila	ungrouped	R	S	S
2018FPG037	SRR31011366	2018	Lazio	Not available	0	0	624116	595089	95.35	25	43531	Mono-FQs	gyrA: Asp94Gly	2.2.1	Beijing	group_101	S	S	S
2018FPG039	SRR31011364	2018	Lazio	Not available	0	0	875897	840911	96.01	35	26772	Mono-INH	katG:Ser315Thr	4.8	mainly T	ungrouped	R	S	S
2018FPG041	SRR31011363	2018	Lazio	Not available	0	0	1071716	1066997	99.56	56	27219	Pan-S		4.7	mainly T	group_107	S	S	S
2018FPG043	SRR31011362	2018	Lazio	Not available	0	0	2895568	2881622	99.52	139	29375	Pan-S		4.1.2.1	Haarlem	ungrouped	S	S	S
2018FPG044	SRR31011361	2018	Lazio	Not available	0	0	2760447	2747103	99.52	135	24063	Other	embA:Ala201Thr	4.1.1.2	X-type	ungrouped	S	S	S
2018FPG045	SRR31011360	2018	Lazio	Not available	0	0	2556729	2541016	99.39	120	27176	Pan-S		3	Delhi-CAS	ungrouped	S	S	S
2018FPG048	SRR31011359	2018	Lazio	Not available	0	0	3908868	3846605	98.41	184	18946	Pan-S		4.4.1.1	S-type	ungrouped	S	S	S
2018FPG050	SRR31011358	2018	Lazio	Not available	0	0	2926379	2915945	99.64	154	38928	Pan-S		4.8	mainly T	ungrouped	S	S	S
2018FPG051	SRR31011357	2018	Lazio	Not available	0	Not available	2589323	2574209	99.42	136	40796	Pan-S		4.1.2.1	Haarlem	group_15	S	S	S
2018FPG052	SRR31011356	2018	Lazio	Not available	0	1	1383150	1370016	99.05	71	43055	Pan-S		4.8	mainly T	ungrouped	S	S	S
2018FPG053	SRR31011355	2018	Lazio	Not available	0	0	666841	648516	97.25	29	42465	Other	rpsL:Lys43Arg	2.2.1	Beijing	ungrouped	S	S	R
2019FPG001	SRR31011353	2019	Lazio	Not available	0	0	2092318	2076269	99.23	101	49966	Pan-S		2.2.1	Beijing	group_101	S	S	R
2019FPG002	SRR31011352	2019	Lazio	Not available	0	0	1567740	1546688	98.66	71	45791	Pan-S		1.2.1	EAI Manila	group_109	S	S	S
2019FPG003	SRR31011351	2019	Lazio	Not available	0	0	3273304	3253250	99.39	163	35944	Pan-S		4.1.2.1	Haarlem	ungrouped	S	S	S
2019FPG004	SRR31011350	2019	Lazio	Not available	0	Not available	2150547	2143165	99.66	111	24791	Pan-S		4.3.3	LAM	ungrouped	S	S	S
2019FPG005	SRR31011349	2019	Lazio	Not available	0	0	3144193	3124564	99.38	162	28940	Poly-resistant	gyrA: Ser91Pro , rpsL:Lys43Arg	3	Delhi-CAS	ungrouped	S	S	S
2019FPG006	SRR31011348	2019	Lazio	Not available	1	Not available	3143502	3117673	99.18	163	35274	Pan-S		1.2.1	EAI Manila	group_109	S	S	R
2019FPG007	SRR31011347	2019	Lazio	Not available	0	0	2227171	2217367	99.56	110	49720	Pan-S		4.6.2.2	Cameroon	ungrouped	S	S	S
2019FPG008	SRR31011346	2019	Lazio	Not available	0	Not available	1297276	1290643	99.49	71	34661	Pan-S		4.3.1	LAM	group_233	S	S	S
2019FPG009	SRR31011345	2019	Lazio	Not available	0	0	1727894	1714438	99.22	92	20122	Pan-S		4.2.1	Ural	ungrouped	S	S	S
2019FPG010	SRR31011344	2019	Lazio	Not available	0	0	2386792	2379012	99.67	113	31165	Pan-S		4.8	mainly T	group_207	S	S	R
2019FPG011	SRR31011342	2019	Lazio	Not available	0	0	2287323	2278733	99.62	107	38746	Pan-S		4.3.3	LAM	ungrouped	S	S	S
2019FPG013	SRR31011341	2019	Lazio	Not available	0	0	2359766	2351279	99.64	97	9854	Pan-S		4.8	mainly T	group_36	S	S	S
2019FPG014	SRR31011340	2019	Lazio	Not available	0	0	2058533	2050994	99.63	100	16517	Pan-S		4.8	mainly T	ungrouped	S	S	S
2019FPG015	SRR31011339	2019	Lazio	Not available	0	Not available	2579848	2568819	99.57	133	26502	Pan-S		4.1.2.1	Haarlem	ungrouped	S	S	S
2019FPG016	SRR31011338	2019	Lazio	Not available	0	0	2671684	2659675	99.55	135	21734	Pan-S		3	Delhi-CAS	ungrouped	S	S	S
2019FPG017	SRR31011337	2019	Lazio	Not available	0	0	3097733	3080779	99.45	163	27809	Pan-S		4.1.2.1	Haarlem	group_133	S	S	S
2019FPG018	SRR31011336	2019	Lazio	Not available	0	0	2241351	2227459	99.38	102	19103	Pan-S		4.1.2.1	Haarlem	ungrouped	S	S	R
2019FPG019	SRR31011335	2019	Lazio	Not available	1	0	2567536	2553456	99.45	133	23041	Pan-S		4.1.2.1	Haarlem	ungrouped	S	S	S
2019FPG020	SRR31011334	2019	Lazio	Not available	0	0	2844519	2824509	99.3	149	36786	Pan-S		4	Euro-American	ungrouped	S	S	S
2019FPG021	SRR31011333	2019	Lazio	Not available	0	0	2601467	2586587	99.43	134	38753	Pan-S		2.2.1	Beijing	group_101	S	S	S
2019FPG022	SRR31011331	2019	Lazio	Not available	0	0	2578406	2566956	99.56	134	24081	Pan-S		4.4.1.1	S-type	ungrouped	S	S	S
2019FPG023	SRR31011330	2019	Lazio	Not available	0	1	3749888	3732253	99.53	195	31909	Pan-S		4.8	mainly T	ungrouped	S	S	S
2019FPG024	SRR31011329	2019	Lazio	Not available	0	0	2882839	2869229	99.53	147	14891	Pan-S		4.8	mainly T	ungrouped	S	S	S
2019FPG026	SRR31011328	2019	Lazio	Not available	0	Not available	2913600	2900291	99.54	152	33300	Pan-S		4.4.1.2	Euro-American	group_215	S	S	S
2019FPG027	SRR31011327	2019	Lazio	Not available	1	0	2532486	2522066	99.59	132	20292	Pan-S		4.4.1.1	S-type	ungrouped	S	S	S
2019FPG028	SRR31011326	2019	Lazio	Not available	0	0	3400502	3383289	99.49	175	35550	Poly-resistant	katG:Ser315Asn, pncA:Phe58Leu	4.1.2.1	Haarlem	group_112	R	R	S
2019FPG029	SRR31011325	2019	Lazio	Not available	Not available	Not available	1223379	1216924	99.47	55	35903	Pan-S		4.4.1.2	Euro-American	group_215	S	S
2019FPG031	SRR31011324	2019	Lazio	Not available	1	Not available	8649363	8609881	99.54	444	23810	Pan-S		4.8	mainly T	group_211	S	S	S
2019FPG032	SRR31011323	2019	Lazio	Not available	0	0	1944779	1936179	99.56	99	43966	Pan-S		4.8	mainly T	ungrouped	S	S	S
2019FPG033	SRR31011322	2019	Lazio	Not available	0	0	1228750	1221754	99.43	61	45284	Mono-FQs	gyrA: Asp94Gly	2.2.1	Beijing	group_101	S	S	S
2019FPG035	SRR31011452	2019	Lazio	Not available	1	0	1971512	1963703	99.6	97	19229	Pan-S		4.1.2.1	Haarlem	ungrouped	S	S	S
2019FPG036	SRR31011451	2019	Lazio	Not available	0	0	2211941	2197697	99.36	113	22789	Pan-S		4.1.2.1	Haarlem	ungrouped	S	S	S
2019FPG037	SRR31011450	2019	Lazio	Not available	1	0	1803386	1796082	99.59	95	18176	Pan-S		4.8	mainly T	ungrouped	S	S	S
2019FPG039	SRR31011449	2019	Lazio	Not available	0	Not available	2376278	2365755	99.56	111	14508	Pan-S		3	Delhi-CAS	ungrouped	S	S	S
2019FPG040	SRR31011448	2019	Lazio	Not available	0	0	2586119	2523541	97.58	114	10454	Pan-S		4.8	mainly T	ungrouped	S	S	S	S
2019FPG041	SRR31011447	2019	Lazio	Not available	0	0	1889177	1880178	99.52	95	31321	Pan-S		4.1.2.1	Haarlem	group_135	S	S	S
2019FPG042	SRR31011446	2019	Lazio	Not available	0	0	1266285	1260485	99.54	64	41164	Pan-S		4.1.2.1	Haarlem	ungrouped	S	S	S
2019FPG044	SRR31011445	2019	Lazio	Not available	0	0	1683232	1666149	98.99	78	26481	Mono-INH	fabG1_ups:C-15T- 1673425	1.2.1	EAI Manila	group_144	R	S	S
2019FPG045	SRR31011444	2019	Lazio	Not available	0	0	2430534	2417712	99.47	123	38984	Pan-S		4.1.2.1	Haarlem	ungrouped	S	S	S
2019FPG046	SRR31011443	2019	Lazio	Not available	1	Not available	1963904	1948402	99.21	100	26988	Mono-INH	fabG1_ups:C-15T- 1673425	1.2.1	EAI Manila	group_144	R	S	S
2019FPG047	SRR31011441	2019	Lazio	Not available	0	0	1929194	1917048	99.37	101	35244	Pan-S		2.2.1	Beijing	ungrouped	S	S	S
2019FPG049	SRR31011440	2019	Lazio	Not available	0	0	2219818	2211699	99.63	111	14498	Pan-S		4.3.3	LAM	ungrouped	S	S	S
2019FPG051	SRR31011439	2019	Lazio	Not available	Not available	0	1681065	1670443	99.37	87	22335	Pan-S		1.1.2	EAI	ungrouped	S	S	S	S
2020FPG001	SRR31011438	2020	Lazio	Not available	0	Not available	2300221	2287823	99.46	120	11894	Pan-S		4.1.2.1	Haarlem	ungrouped	S	S	R	S
2020FPG002	SRR31011437	2020	Lazio	Not available	0	0	2627328	2610017	99.34	129	27171	Pan-S		3	Delhi-CAS	ungrouped	S	S	S	S
2020FPG004	SRR31011436	2020	Lazio	Not available	1	Not available	1682922	1676618	99.63	88	38560	Pan-S		4.7	mainly T	ungrouped	S	S	S	S
2020FPG006	SRR31011435	2020	Lazio	Not available	0	Not available	1996166	1972568	98.82	93	24177	Pan-S		4.1.2.1	Haarlem	ungrouped	S	S	S	S
2020FPG008	SRR31011434	2020	Lazio	Not available	0	Not available	1893113	1883861	99.51	90	27999	Pan-S		4.7	mainly T	ungrouped	S	S	S	S
2020FPG009	SRR31011433	2020	Lazio	Not available	0	0	2127820	2117567	99.52	109	28838	Pan-S		4.4.1.1	S-type	ungrouped	S	S	S	S
2020FPG012	SRR31011432	2020	Lazio	Not available	0	0	2259519	2243194	99.28	115	12244	Other	tlyA: Leu118Pro	1.2.1	EAI Manila	ungrouped	S	S	S	S
2020FPG013	SRR31011430	2020	Lazio	Not available	0	1	2391203	2373180	99.25	119	27945	Pan-S		4.1.2.1	Haarlem	ungrouped	S	S	S	S
2020FPG014	SRR31011429	2020	Lazio	Not available	0	Not available	1769651	1762420	99.59	90	14800	Poly-resistant	fabG1_ups:C-15T- 1673425, gyrA: Asp94Gly	3	Delhi-CAS	ungrouped	R	S	S	S
2020FPG015	SRR31011428	2020	Lazio	Not available	0	Not available	1967413	1959283	99.59	104	47108	Pan-S		4.3.4.1	LAM	ungrouped	S	S	S	S
2020FPG016	SRR31011427	2020	Lazio	Not available	0	0	1909057	1899713	99.51	97	5273	Mono-Rif	rpoB:His445Asp	4.8	mainly T	group_232	S	R	S	S
2020FPG017	SRR31011426	2020	Lazio	Not available	1	0	1884751	1877933	99.64	98	36426	Pan-S		4.3.3	LAM	ungrouped	S	S	S	S
2020FPG018	SRR31011425	2020	Lazio	Not available	0	1	2359887	2344656	99.35	114	34810	Pan-S		4.4.1.2	Euro-American	group_215	S	S	S	S
2020FPG030	SRR31011424	2020	Lazio	Not available	0	Not available	1388062	1380743	99.47	70	43393	Pan-S		4.1.2.1	Haarlem	ungrouped	S	S	S	S
2020FPG031	SRR31011423	2020	Lazio	Not available	0	0	2398216	2387750	99.56	121	17918	Pan-S		4.8	mainly T	group_56	S	S	S	S
2020FPG032	SRR31011422	2020	Lazio	Not available	0	0	2436192	2423731	99.49	121	53932	Mono-INH	katG:Ser315Thr	4.3.4.2	LAM	ungrouped	R	S	S	S
2020FPG033	SRR31011421	2020	Lazio	Not available	0	0	2023576	2006369	99.15	101	28604	Pan-S		4.1.2.1	Haarlem	ungrouped	S	S	S	S
2020FPG034	SRR31011419	2020	Lazio	Not available	0	0	2033935	2021068	99.37	104	34131	Pan-S		4.1.2.1	Haarlem	ungrouped	S	S	S	S
2020FPG039	SRR31011418	2020	Lazio	Not available	0	0	2406687	2393782	99.46	122	38055	Pan-S		2.2.1	Beijing	ungrouped	S	S	S	S
2020FPG042	SRR31011417	2020	Lazio	Not available	0	0	2255990	2241641	99.36	114	10820	Pan-S		1.2.1	EAI Manila	ungrouped	S	S	S	S
2020FPG044	SRR31011416	2020	Lazio	Not available	0	0	1969811	1957997	99.4	103	46043	Pan-S		4.1.2.1	Haarlem	group_156	S	S	S	S
IT1000	SRR29126434	2018	Lombardy	1	0	Not available	4075425	3858404	94.67	104	35472	Pan-S		3	Delhi-CAS	ungrouped	S	S	S	S
IT1001	SRR29126423	2018	Lombardy	1	0	Not available	6593481	6541414	99.21	181	33020	Pan-S		4.3.3	LAM	ungrouped	S	S	S	S
IT1002	SRR29126196	2018	Lombardy	1	0	Not available	2980556	2958538	99.26	92	36392	Pan-S		4.6.2.2	Cameroon	ungrouped	S	S	S	S
IT1003	SRR29126185	2018	Lombardy	1	0	Not available	1710862	1666989	97.44	50	29312	Other	rrs:1472337_C>T_SNP	4.3.2	LAM	group_205	S	S	S	S
IT1005	SRR29127120	2018	Lombardy	1	0	Not available	3079424	3054834	99.2	87	15995	Pan-S		4.8	mainly T	ungrouped	S	S	S	S
IT1006	SRR29127123	2018	Lombardy	0	0	Not available	2993635	2973199	99.32	90	63174	Pan-S		4.3.4.2	LAM	ungrouped	S	S	S	S
IT1007	SRR29127119	2018	Lombardy	0	0	Not available	3539053	3509723	99.17	98	21877	Pan-S		4.1.2.1	Haarlem	group_87	S	S	S	S
IT1008	SRR29127136	2018	Lombardy	1	0	Not available	2271978	2258793	99.42	70	25491	Pan-S		4.8	mainly T	group_222	S	S	S	S
IT1010	SRR29127127	2018	Lombardy	1	0	Not available	2685511	2661708	99.11	80	17444	Pan-S		4.1	Euro-American	ungrouped	S	S	S	S
IT1011	SRR29127131	2018	Lombardy	1	0	Not available	3189353	3162920	99.17	93	20859	Pan-S		4.1.2.1	Haarlem	ungrouped	S	S	S	S
IT1012	SRR29127132	2018	Lombardy	1	0	Not available	2722270	2703346	99.3	84	19566	Pan-S		4.4.1.1	S-type	ungrouped	S	S	S	S
IT1013	SRR29127135	2018	Lombardy	1	0	Not available	2846181	2826764	99.32	84	59387	Pan-S		4.3.4.2	LAM	group_263	S	S	S	S
IT1015	SRR29127130	2018	Lombardy	1	0	Not available	3579842	3543689	98.99	100	18429	Pan-S		3	Delhi-CAS	group_247	S	S	S	S
IT1017	SRR29127128	2018	Lombardy	0	0	Not available	2960395	2938564	99.26	86	18077	Pan-S		4.8	mainly T	ungrouped	S	S	S	S
IT1018	SRR29127125	2018	Lombardy	1	0	Not available	2110683	2096715	99.34	66	32630	Pan-S		4.8	mainly T	ungrouped	S	S	S	S
IT1019	SRR29127124	2018	Lombardy	1	0	Not available	2850244	2828921	99.25	82	26518	Pan-S		4.7	mainly T	ungrouped	S	S	S	S
IT1020	SRR29127114	2018	Lombardy	1	0	Not available	2075378	2059355	99.23	61	29152	Pan-S		4.3.1	LAM	ungrouped	S	S	S	S
IT1021	SRR29127121	2018	Lombardy	1	0	Not available	2451257	2427389	99.03	74	27243	Pan-S		4.1.2.1	Haarlem	group_167	S	S	S	S
IT1022	SRR29127110	2018	Lombardy	0	0	Not available	2636374	2617525	99.29	81	34400	Pan-S		4.4.1.1	S-type	ungrouped	S	S	S	S
IT1024	SRR29126349	2018	Lombardy	0	0	Not available	2071448	2055903	99.25	63	25216	Pan-S		4.1.1	X-type	ungrouped	S	S	S	S
IT1025	SRR29126376	2017	Lombardy	1	1	Not available	2865943	2842203	99.17	88	27955	Pan-S		4.1.1	X-type	group_218	S	S	S	S
IT1026	SRR29126375	2018	Lombardy	0	1	Not available	3034731	3014093	99.32	98	17127	Pan-S		4.8	mainly T	ungrouped	S	S	S	S
IT1027	SRR29126374	2018	Lombardy	1	0	Not available	2933328	2904352	99.01	88	19824	Pan-S		4.1.1.3	X-type	ungrouped	S	S	S	S
IT1028	SRR29126373	2018	Lombardy	1	0	Not available	2146503	2128719	99.17	65	41148	Pan-S		4.1.2.1	Haarlem	group_2	S	S	S	S
IT1029	SRR29126372	2018	Lombardy	0	0	Not available	3794707	3760463	99.1	111	29123	Pan-S		4.1.2.1	Haarlem	ungrouped	S	S	S	S
IT1030	SRR29126371	2018	Lombardy	1	0	Not available	3223715	3192867	99.04	92	36821	Pan-S		4.1.2.1	Haarlem	ungrouped	S	S	S	S
IT1031	SRR29126370	2018	Lombardy	1	0	Not available	2557864	2539735	99.29	76	37636	Pan-S		4.3.3	LAM	ungrouped	S	S	S	S
IT1032	SRR29126369	2018	Lombardy	0	0	Not available	2253602	2236632	99.25	67	20671	Pan-S		4.4.1.1	S-type	ungrouped	S	S	S	S
IT1033	SRR29126368	2018	Lombardy	1	0	Not available	4536215	4480735	98.78	127	27718	Pan-S		4.1.2	Euro-American	ungrouped	S	S	S	S
IT1034	SRR29126366	2018	Lombardy	1	0	Not available	2533801	2511876	99.13	76	10593	Pan-S		3	Delhi-CAS	ungrouped	S	S	S	S
IT1035	SRR29126365	2018	Lombardy	1	0	Not available	2532055	2513741	99.28	78	15942	Pan-S		4.5	Euro-American	ungrouped	S	S	S	S
IT1036	SRR29126364	2018	Lombardy	1	1	Not available	3004979	2988589	99.45	96	54953	Pan-S		4.6.2.2	Cameroon	group_246	S	S	S	S
IT1039	SRR29126362	2018	Lombardy	1	0	Not available	2080663	2065244	99.26	62	38849	Pan-S		4.1.2.1	Haarlem	ungrouped	S	S	S	S
IT1040	SRR29126361	2018	Lombardy	0	0	Not available	2212733	2196560	99.27	68	27463	Pan-S		4.1.2.1	Haarlem	ungrouped	S	S	S	S
IT1041	SRR29126360	2018	Lombardy	1	0	Not available	2643650	2630463	99.5	83	55441	Pan-S		4.6.2.2	Cameroon	group_246	S	S	S	S
IT1042	SRR29126359	2018	Lombardy	1	0	Not available	3722649	3680029	98.86	107	24693	Pan-S		4.3.3	LAM	ungrouped	S	S	S	S
IT1043	SRR29126752	2018	Lombardy	1	0	Not available	2896954	2876929	99.31	92	54688	Pan-S		4.6.2.2	Cameroon	group_117	S	S	S	S
IT1044	SRR29126750	2018	Lombardy	1	0	Not available	2112648	2100452	99.42	65	31840	Mono-Rif	rpoB:Ser450Leu	4.7	mainly T	ungrouped	S	R	S	S
IT1045	SRR29126347	2018	Lombardy	1	0	Not available	3906809	3860757	98.82	108	15911	Pan-S		3	Delhi-CAS	ungrouped	S	S	S	S
IT1046	SRR29126755	2018	Lombardy	1	0	Not available	3933218	3878332	98.6	113	44444	Pan-S		5	West-Africa 1	ungrouped	S	S	S	S
IT1047	SRR29126746	2018	Lombardy	0	0	Not available	3064039	3037137	99.12	95	29874	Pan-S		4.1.2.1	Haarlem	ungrouped	S	S	S	S
IT1048	SRR29126754	2018	Lombardy	0	1	Not available	2532002	2513322	99.26	79	25062	Pan-S		4.1.2.1	Haarlem	ungrouped	S	S	S	S
IT1049	SRR29126348	2018	Lombardy	1	0	Not available	2751517	2732294	99.3	85	38448	Other	rpsL:Lys43Arg	2.2.1	Beijing	group_242	S	S	S	S
IT1050	SRR29126357	2018	Lombardy	1	1	Not available	3557591	3538295	99.46	110	64601	Other	rrs:1472362_C>T_SNP	4.3.4.2	LAM	ungrouped	S	S	S	S
IT1051	SRR29126355	2018	Lombardy	0	0	Not available	3591324	3547322	98.77	108	8858	Pan-S		4.2.1	Ural	ungrouped	S	S	S	S
IT1052	SRR29126354	2018	Lombardy	1	1	Not available	3480833	3453640	99.22	112	27084	Pan-S		4.1.1.1	X-type	ungrouped	S	S	S	S
IT1054	SRR29126352	2018	Lombardy	1	0	Not available	2281076	2258121	98.99	72	41103	Pan-S		1.1.2	EAI	ungrouped	S	S	S	R
IT1055	SRR29126351	2018	Lombardy	1	1	Not available	3278935	3255766	99.29	101	30541	Pan-S		4.3.3	LAM	ungrouped	S	S	S	S
IT1056	SRR29126350	2018	Lombardy	1	0	Not available	3396326	3356619	98.83	105	26244	Mono-INH	fabG1_ups:C-15T- 1673425	4.8	mainly T	group_181	R	S	S	S
IT1057	SRR29126751	2018	Lombardy	0	0	Not available	4351963	4310268	99.04	127	30200	Pan-S		4.8	mainly T	ungrouped	S	S	S	S
IT1058	SRR29126753	2018	Lombardy	1	0	Not available	2335183	2313488	99.07	73	42294	Pan-S		1.2.1	EAI Manila	ungrouped	S	S	S	S
IT1059	SRR29126741	2018	Lombardy	1	0	Not available	3278961	3247366	99.04	96	13423	Pan-S		4.1.2.1	Haarlem	ungrouped	S	S	S	S
IT1061	SRR29127091	2018	Lombardy	1	0	Not available	3213470	3173939	98.77	98	53974	Pan-S		4.3.4.2	LAM	ungrouped	S	S	S	S
IT1062	SRR29126747	2018	Lombardy	1	0	Not available	2792819	2773277	99.3	89	23401	Pan-S		4.8	mainly T	ungrouped	S	S	S	S
IT1063	SRR29126735	2018	Lombardy	1	0	Not available	2329253	2314391	99.36	75	32867	Pan-S		4.8	mainly T	ungrouped	S	S	S	S
IT1064	SRR29126730	2018	Lombardy	1	0	Not available	3715242	3650475	98.26	91	18865	Pan-S		3	Delhi-CAS	ungrouped	S	S	S	S
IT1065	SRR29126729	2018	Lombardy	0	1	Not available	3931682	3886668	98.86	111	26282	Pan-S		4.1.2.1	Haarlem	ungrouped	S	S	S	S
IT1066	SRR31008687	2018	Lombardy	0	1	Not available	1696447	1680010	99.03	55	118512	Other	pncA:His57Asp	M. bovis	M. bovis	group_48	S	S	S	R
IT1068	SRR29126728	2018	Lombardy	1	1	Not available	2474158	2455968	99.26	73	20246	Pan-S		3	Delhi-CAS	ungrouped	S	S	S	S
IT1069	SRR29126815	2018	Lombardy	1	1	Not available	2336804	2317631	99.18	74	30654	Pan-S		4.1.2.1	Haarlem	group_82	S	S	S	R
IT1070	SRR29127089	2018	Lombardy	0	0	Not available	2297554	2281687	99.31	69	36710	MDR	eis_ups:G-14A- 2715346, embB:Met306Val, katG: Ser315Thr, rpoB:Ser450Leu, rrs:1472362_C>T_SNP	2.2.1	Beijing	ungrouped	R	R	R	R
IT1071	SRR29126820	2018	Lombardy	1	0	Not available	2916241	2892447	99.18	92	22908	Pan-S		4.8	mainly T	group_178	S	S	S	S
IT1072	SRR29126841	2018	Lombardy	1	0	Not available	3301506	3243011	98.23	99	36085	Pan-S		2.2.1	Beijing	ungrouped	S	S	S	S
IT1073	SRR29126819	2018	Lombardy	1	0	Not available	2697963	2678615	99.28	84	36915	Mono-INH	katG:Ser315Thr	2.2.1	Beijing	ungrouped	R	S	S	S
IT1074	SRR29126829	2018	Lombardy	1	0	Not available	2450329	2432132	99.26	78	26911	Pan-S		4.8	mainly T	ungrouped	S	S	S	S
IT1075	SRR29126843	2018	Lombardy	1	0	Not available	3927915	3884968	98.91	121	24603	Poly-resistant	fabG1_ups:C-15T- 1673425, gyrA: Asp94Gly	3	Delhi-CAS	ungrouped	R	S	S	S
IT1077	SRR29126830	2018	Lombardy	1	0	Not available	2971651	2941004	98.97	89	57324	Pan-S		6	West-Africa 2	group_114	S	S	S	S
IT1078	SRR29126842	2018	Lombardy	1	0	Not available	3837790	3808980	99.25	116	24366	Pan-S		4.4.1	Euro-American	ungrouped	S	S	S	S
IT1080	SRR29126345	2018	Lombardy	1	0	Not available	2696704	2668587	98.96	83	27687	Pan-S		1.1.2	EAI	ungrouped	S	S	S	R
IT1081	SRR31008686	2018	Lombardy	1	1	Not available	3714093	3678586	99.04	114	91797	Other	pncA:His57Asp	M. bovis	M. bovis	ungrouped	S	S	S	R
IT1083	SRR29127088	2018	Lombardy	1	1	Not available	3202026	3188341	99.57	101	12202	Pan-S		4.8	mainly T	group_14	S	S	S	S
IT1084	SRR29127087	2018	Lombardy	0	0	Not available	2805195	2783030	99.21	87	23773	Pan-S		4.8	mainly T	group_98	S	S	S	S
IT1085	SRR29127086	2018	Lombardy	0	1	Not available	4081586	4053079	99.3	125	23500	Pan-S		4.8	mainly T	ungrouped	S	S	S	S
IT1087	SRR29127084	2018	Lombardy	1	0	Not available	3387270	3353701	99.01	105	12096	Pan-S		1.2.1	EAI Manila	ungrouped	S	S	S	S
IT1088	SRR29127083	2018	Lombardy	0	1	Not available	2368435	2355624	99.46	76	24567	Pan-S		4.4.1.1	S-type	ungrouped	S	S	S	S
IT1089	SRR31008935	2018	Lombardy	0	0	Not available	3856404	3825379	99.2	123	117307	Other	pncA:His57Asp	M. bovis	M. bovis	group_23	S	S	S	R
IT1090	SRR29127081	2018	Lombardy	0	1	Not available	2143941	2130960	99.39	69	18533	Pan-S		4.8	mainly T	ungrouped	R	S	S	S
IT1091	SRR29127080	2018	Lombardy	0	0	Not available	2559259	2526821	98.73	76	20425	Pan-S		4.1.2.1	Haarlem	group_69	S	S	S	S
IT1092	SRR29127079	2018	Lombardy	0	0	Not available	2155832	2139206	99.23	68	16283	Pan-S		4.8	mainly T	ungrouped	S	S	S	S
IT1093	SRR29127078	2018	Lombardy	1	0	Not available	2986553	2963678	99.23	89	28375	Pan-S		4.8	mainly T	ungrouped	S	S	S	S
IT1094	SRR29127077	2018	Lombardy	0	0	Not available	4433114	4394222	99.12	127	17846	Pan-S		4.7	mainly T	ungrouped	S	S	S	S
IT1095	SRR31008608	2018	Lombardy	0	0	Not available	3191644	3143697	98.5	103	79970	Pan-S		M. caprae	M. caprae	ungrouped	S	S	S	R
IT1096	SRR31008425	2018	Lombardy	0	1	Not available	3316082	3286243	99.1	100	107758	Poly-resistant	gyrA:Asp94His, pncA:His57Asp	M. bovis	M. bovis	group_48	S	S	S	R
IT1097	SRR29127076	2018	Lombardy	1	0	Not available	2530216	2505317	99.02	78	29389	Pan-S		4.8	mainly T	group_18	S	S	S	S
IT1098	SRR29127075	2018	Lombardy	1	0	Not available	3516875	3469628	98.66	105	12280	Pan-S		4.5	Euro-American	ungrouped	S	S	S	S
IT1099	SRR29127074	2018	Lombardy	1	0	Not available	3294755	3268632	99.21	103	17490	Pan-S		4.8	mainly T	group_86	R	S	S	S
IT1100	SRR29127073	2018	Lombardy	1	0	Not available	2470424	2449670	99.16	78	33277	Pan-S		4.1.2.1	Haarlem	group_224	S	S	S	S
IT1101	SRR29127072	2018	Lombardy	1	0	Not available	3665352	3632801	99.11	110	37229	Pan-S		4.1.2.1	Haarlem	group_2	S	S	S	S
IT1102	SRR29127070	2018	Lombardy	0	0	Not available	1964949	1950927	99.29	62	41453	Pan-S		4.1.2.1	Haarlem	group_2	S	S	S	S
IT1104	SRR29127068	2018	Lombardy	1	0	Not available	3600128	3573181	99.25	112	57750	Pan-S		4.3.4.2	LAM	ungrouped	S	S	S	S
IT1105	SRR29127067	2018	Lombardy	1	1	Not available	2573189	2558724	99.44	78	16761	Pan-S		4.9	H37Rv-like	ungrouped	S	S	S	S
IT1106	SRR29126850	2018	Lombardy	1	0	Not available	1663977	1648503	99.07	53	38182	Pan-S		4.3.3	LAM	group_140	S	S	S	S
IT1107	SRR29126849	2018	Lombardy	0	0	Not available	1678806	1666466	99.26	52	31635	Pan-S		4.1.2	Euro-American	ungrouped	S	S	S	S
IT1108	SRR29126848	2018	Lombardy	1	0	Not available	1660513	1644593	99.04	52	24339	Pan-S		4.1.1	X-type	ungrouped	S	S	S	S
IT1111	SRR29126847	2018	Lombardy	1	0	Not available	2022186	2006997	99.25	65	31718	Pan-S		4.8	mainly T	ungrouped	R	S	S	S
IT1112	SRR29126846	2018	Lombardy	1	1	Not available	3009832	2983629	99.13	91	25846	Pan-S		4.3.3	LAM	group_140	S	S	S	S
IT1113	SRR29126845	2018	Lombardy	1	0	Not available	2055535	2039463	99.22	64	35277	Pan-S		4.1.2.1	Haarlem	ungrouped	S	S	S	S
IT1114	SRR29127085	2018	Lombardy	0	0	Not available	1959722	1941986	99.09	63	21921	Pan-S		4.8	mainly T	ungrouped	S	S	S	S
IT1115	SRR29126831	2018	Lombardy	1	0	Not available	2915319	2883602	98.91	89	12451	Pan-S		4.4.2	Euro-American	ungrouped	S	S	S	S
IT1116	SRR29126840	2018	Lombardy	1	0	Not available	2531548	2509514	99.13	81	35058	Pan-S		4.1.2.1	Haarlem	ungrouped	S	S	S	S
IT1117	SRR29126828	2018	Lombardy	0	0	Not available	2542909	2517083	98.98	81	27938	Pan-S		4.1.2	Euro-American	ungrouped	S	S	S	S
IT1119	SRR29126334	2018	Lombardy	0	1	Not available	3297731	3270092	99.16	105	35818	Pan-S		4.8	mainly T	ungrouped	S	S	S	S
IT1120	SRR31008746	2018	Lombardy	1	0	Not available	3412667	3376672	98.95	109	84904	Other	pncA:His57Asp	M. bovis	M. bovis	ungrouped	S	S	S	R
IT1121	SRR29126340	2018	Lombardy	1	0	Not available	3280294	3251336	99.12	106	36246	Mono-INH	katG:Ser315Thr	4.3.3	LAM	ungrouped	R	S	S	S
IT1122	SRR29126344	2018	Lombardy	1	0	Not available	2318452	2290785	98.81	74	34232	Pan-S		1.1.3	EAI	ungrouped	S	S	S	S
IT1123	SRR29126821	2018	Lombardy	0	0	Not available	3086273	3060389	99.16	95	27022	Pan-S		4.1.1.1	X-type	ungrouped	S	S	S	S
IT1125	SRR29126816	2018	Lombardy	1	0	Not available	2153826	2130843	98.93	69	28752	Pan-S		4.2.2	Euro-American	ungrouped	S	S	S	S
IT1126	SRR29126817	2018	Lombardy	1	0	Not available	1946983	1930714	99.16	59	24229	Pan-S		4.1.2.1	Haarlem	group_127	S	S	S	S
IT1127	SRR29126818	2018	Lombardy	1	0	Not available	2230486	2212843	99.21	70	26200	Pan-S		4.3.1	LAM	group_84	S	S	S	S
IT1128	SRR29126337	2018	Lombardy	1	0	Not available	2257556	2236661	99.07	70	29311	Pan-S		4.5	Euro-American	group_148	S	S	S	R
IT1130	SRR29126338	2018	Lombardy	0	0	Not available	2829853	2804215	99.09	89	21639	Pan-S		3	Delhi-CAS	ungrouped	S	S	S	S
IT1131	SRR29126331	2018	Lombardy	1	0	Not available	2508272	2488198	99.2	79	26699	Pan-S		4.7	mainly T	ungrouped	S	S	S	S
IT1132	SRR29126329	2018	Lombardy	1	0	Not available	3515181	3484763	99.13	106	29070	Pan-S		4.1.2.1	Haarlem	ungrouped	S	S	S	S
IT1133	SRR29126333	2018	Lombardy	1	0	Not available	3107700	3079751	99.1	99	24938	Pan-S		4.1.2.1	Haarlem	ungrouped	S	S	S	S
IT1134	SRR29126335	2018	Lombardy	0	0	Not available	3378016	3356059	99.35	108	65271	Pan-S		4.3.4.2	LAM	ungrouped	S	S	S	S
IT1135	SRR29126327	2018	Lombardy	0	0	Not available	2018821	2003807	99.26	64	32828	Pan-S		4.3.3	LAM	group_259	S	S	S	S
IT1136	SRR29126328	2018	Lombardy	1	0	Not available	1758445	1742586	99.1	56	35804	Pan-S		4.1.2.1	Haarlem	group_210	S	S	S	S
IT1138	SRR29126358	2018	Lombardy	0	1	Not available	5040718	4935286	97.91	143	10388	Pan-S		4.8	mainly T	ungrouped	S	S	S	S
IT1139	SRR29126346	2018	Lombardy	1	0	Not available	2028676	2014925	99.32	62	24262	Pan-S		4.1.2.1	Haarlem	group_65	S	S	S	S
IT1140	SRR29126827	2018	Lombardy	1	0	Not available	1563528	1464448	93.66	45	37772	Pan-S		4.1.2.1	Haarlem	ungrouped	S	S	S	S
IT1141	SRR29126336	2018	Lombardy	1	0	Not available	3324982	3281341	98.69	102	12414	Pan-S		3	Delhi-CAS	ungrouped	S	S	S	S
IT1142	SRR29126339	2018	Lombardy	1	0	Not available	3374373	3329132	98.66	104	27499	Other	rrs:1472337_C>T_SNP	4.3.2	LAM	ungrouped	R	S	S	S
IT1143	SRR29126332	2018	Lombardy	1	1	Not available	2672870	2647484	99.05	86	29667	Pan-S		4.1.2.1	Haarlem	group_180	S	S	S	S
IT1145	SRR29126744	2018	Lombardy	0	0	Not available	2217754	2209343	99.62	68	27129	Other	rrs:1472359_A>C_SNP	4.9	H37Rv-like	ungrouped	S	S	S	S
IT1148	SRR31008707	2018	Lombardy	Not available	0	Not available	2959468	2934623	99.16	87	39784	Mono-FQs	gyrA:Asp94Ala	2.2.1	Beijing	group_258	S	S
IT1149	SRR29126662	2019	Lombardy	Not available	Not available	Not available	3766073	3735788	99.2	104	13847	Pan-S		4.8	mainly T	group_264	S	S
IT1150	SRR29126684	2019	Lombardy	Not available	0	Not available	2796519	2774492	99.21	82	30761	Pan-S		4.7	mainly T	ungrouped	S	S	S	S
IT1160	SRR31008326	2019	Emilia-Romagna	1	0	Not available	3178702	3142633	98.87	97		MDR	embB:Ser297Ala , fabG1_ups:C-15T- 1673425, katG:Ser315Thr, rpoB:Ser450Leu, rpsL:Lys88Arg	4.2.1	Ural	group_95	R	R	S	R
IT1161	SRR29124288	2019	Lombardy	0	0	Not available	3294470	3263955	99.07	102	27350	Pan-S		4.3.3	LAM	ungrouped	R	S	S	S
IT1196	SRR31008315	2018	Emilia-Romagna	0	1	1	2608856	2588409	99.22	82		MDR	katG: Ser315Thr, pncA:Cys138Arg, rpoB: Leu430Pro, rpsL:Lys43Arg	2.2.1	Beijing	group_31	R	R	R	R
IT1245	SRR29126313	2018	Lombardy	0	0	Not available	2778773	2746661	98.84	84	25254	XDR	embB:Met306Ile, fabG1_ups:C-15T- 1673425, gyrA: Asp94Tyr, katG:Ser315Thr, pncA:Ala146Val, rpoB:Ser450Leu, Rv0678_435bp_Del	4.8	mainly T	group_230	R	R	R	R	R	S			S	S	S	R
IT1246	SRR29126691	2018	Lombardy	0	0	Not available	2714560	2694053	99.24	83	55797	Pan-S		4.3.4.2	LAM	ungrouped	S	S	S	S
IT1247	SRR29126690	2018	Lombardy	1	0	Not available	2049317	2024842	98.81	64	56442	Pan-S		4.3.4.2	LAM	ungrouped	S	S	S	S
IT1248	SRR29126689	2018	Lombardy	1	0	Not available	2933788	2915149	99.36	90	10560	Pan-S		4.8	mainly T	ungrouped	S	S	S	S
IT1249	SRR29126688	2018	Lombardy	0	0	Not available	1826991	1816392	99.42	57	11927	Pan-S		4.8	mainly T	ungrouped	S	S	S	S
IT1250	SRR29126686	2018	Lombardy	1	0	Not available	2038925	2004491	98.31	61	46938	Pan-S		2.2.1	Beijing	group_155	S	S	S	S
IT1251	SRR29127066	2018	Lombardy	0	1	Not available	2530225	2511343	99.25	80	28485	Pan-S		4.1.2.1	Haarlem	ungrouped	S	S	S	S
IT1252	SRR29127065	2018	Lombardy	1	0	Not available	3839474	3800106	98.97	112	54291	Pan-S		6	West-Africa 2	ungrouped	S	S	S	S
IT1253	SRR29127064	2018	Lombardy	1	0	Not available	3014936	2995637	99.36	95	37529	Pan-S		2.2.1	Beijing	group_187	S	S	S	S
IT1254	SRR29127063	2018	Lombardy	1	0	Not available	3130558	3111222	99.38	95	15447	Mono-INH	fabG1_ups:G-17T- 1673423	4	Euro-American	group_64	R	S	S	S
IT1255	SRR29127062	2018	Lombardy	0	0	Not available	3537605	3509612	99.21	105	27520	Pan-S		4.8	mainly T	ungrouped	S	S	S	S
IT1256	SRR29127061	2018	Lombardy	0	0	Not available	4252527	4223013	99.31	130	23953	Pan-S		4.3.3	LAM	group_259	S	S	S	S
IT1257	SRR29127060	2018	Lombardy	1	0	Not available	2996196	2954952	98.62	92	23805	Mono-INH	fabG1_ups:C-15T- 1673425	4.4.1.1	S-type	ungrouped	R	S	S	S	R	S	S	R	S
IT1258	SRR29127059	2018	Lombardy	0	0	Not available	3688156	3661528	99.28	111	27869	Pan-S		4.4.1.1	S-type	ungrouped	S	S	S	S
IT1259	SRR29127058	2018	Lombardy	1	0	Not available	2688844	2657108	98.82	82	35057	Pan-S		1.1.1	EAI	ungrouped	S	S	S	R
IT1260	SRR29127056	2018	Lombardy	0	0	Not available	2479307	2459937	99.22	79	50028	Pan-S		4.1.2.1	Haarlem	ungrouped	S	S	S	S
IT1261	SRR29127055	2018	Lombardy	1	1	Not available	3340112	3314360	99.23	105	18417	Pan-S		4.8	mainly T	ungrouped	S	S	S	S
IT1262	SRR29127054	2018	Lombardy	1	0	Not available	3266954	3242926	99.26	103	18711	Pan-S		4.8	mainly T	ungrouped	S	S	S	R
IT1263	SRR29127053	2018	Lombardy	1	1	Not available	2594324	2563581	98.81	82	41373	Pan-S		4.1.2.1	Haarlem	ungrouped	S	S	S	S
IT1264	SRR29127052	2018	Lombardy	0	0	Not available	2737599	2707891	98.91	85	20187	Pan-S		4.1.2.1	Haarlem	ungrouped	S	S	R	S
IT1265	SRR29127051	2018	Lombardy	0	0	Not available	3040445	3017048	99.23	94	19744	Pan-S		4.8	mainly T	ungrouped	S	S	S	S
IT1266	SRR29127049	2018	Lombardy	1	0	Not available	4175264	3711612	88.9	105	16360	pre_XDR	gyrA:Gly88Cys, katG:Ser315Thr, rpoB:Leu452Pro	1.2.1	EAI Manila	group_125	R	R	S	S
IT1267	SRR29127037	2018	Lombardy	1	0	Not available	2485935	2465165	99.16	76	32250	Pan-S		4.1.2.1	Haarlem	ungrouped	S	S	S	S
IT1268	SRR29127036	2018	Lombardy	0	0	Not available	2916741	2885814	98.94	90	27445	Pan-S		1.2.1	EAI Manila	ungrouped	S	S	S	R
IT1269	SRR29127034	2018	Lombardy	1	1	Not available	3649931	3624653	99.31	114	26951	Pan-S		4.4.1.1	S-type	ungrouped	S	S	S	S
IT1270	SRR29127033	2018	Lombardy	1	0	Not available	2470111	2450769	99.22	75	38687	Pan-S		2.2.1	Beijing	ungrouped	S	S	S	S
IT1271	SRR29127032	2018	Lombardy	1	0	Not available	2065950	2052033	99.33	61	32806	Pan-S		4.7	mainly T	ungrouped	S	S	S	S
IT1272	SRR29127031	2018	Lombardy	1	0	Not available	3114460	3087303	99.13	93	16737	Pan-S		3	Delhi-CAS	group_92	S	S	S	S
IT1273	SRR29126814	2018	Lombardy	0	0	Not available	2916629	2830190	97.04	85	20534	Pan-S		1.1.2	EAI	ungrouped	S	S	S	S
IT1274	SRR29126813	2018	Lombardy	0	0	Not available	3032322	3009355	99.24	94	40185	Pan-S		4.1.2.1	Haarlem	group_2	S	S	S	S
IT1275	SRR29126812	2018	Lombardy	1	0	Not available	3188283	3165092	99.27	97	13780	Pan-S		4.8	mainly T	ungrouped	S	S	S	R
IT1276	SRR29126811	2018	Lombardy	1	0	Not available	2635496	2614926	99.22	78	36142	Pan-S		2.2.1	Beijing	group_169	S	S	S	S
IT1277	SRR29126806	2018	Lombardy	1	0	Not available	3747449	3662445	97.73	116	26313	Pan-S		4.3.3	LAM	group_184	S	S	S	S
IT1278	SRR29126805	2018	Lombardy	1	1	Not available	2357988	2345385	99.47	71	15794	Pan-S		4.3.4.1	LAM	ungrouped	S	S	S	S
IT1279	SRR29126804	2018	Lombardy	1	0	Not available	2773645	2745372	98.98	83	16625	Pan-S		3	Delhi-CAS	ungrouped	S	S	S	S
IT1280	SRR29126803	2018	Lombardy	1	0	Not available	2647924	2624996	99.13	81	18618	Pan-S		4.1.2.1	Haarlem	ungrouped	S	S	S	S
IT1281	SRR29126801	2019	Lombardy	0	0	Not available	2533254	2518062	99.4	78	13295	Pan-S		4.8	mainly T	ungrouped	S	S	S	S
IT1282	SRR29126800	2019	Lombardy	1	1	Not available	3608513	3573787	99.04	111	53400	Pan-S		6	West-Africa 2	ungrouped	S	S	S	S
IT1283	SRR29126799	2019	Lombardy	1	0	Not available	3368272	3317473	98.49	108	22883	Pan-S		3	Delhi-CAS	group_254	S	S	S	S
IT1284	SRR29126798	2019	Lombardy	1	1	Not available	2429043	2409890	99.21	75	13764	Pan-S		3	Delhi-CAS	ungrouped	S	S	S	S
IT1286	SRR29126790	2019	Lombardy	1	0	Not available	1784113	1750904	98.14	55	26607	Pan-S		1.1.3	EAI	group_62	S	S	S	S
IT1288	SRR29126787	2019	Lombardy	1	0	Not available	2048247	2023946	98.81	61	25817	Pan-S		4.1.2.1	Haarlem	ungrouped	S	S	S	S
IT1291	SRR29126782	2019	Lombardy	1	0	Not available	2120211	1532080	72.26	48	33834	Pan-S		4.1.2.1	Haarlem	group_224	S	S	S	S
IT1292	SRR29126781	2019	Lombardy	1	0	Not available	1895757	1876207	98.97	58	36339	Pan-S		4.1.2.1	Haarlem	group_44	S	S	S	S
IT1293	SRR29126780	2019	Lombardy	1	0	Not available	2403201	2381712	99.11	72	39848	Pan-S		2.2.1	Beijing	group_155	S	S	S	S
IT1294	SRR29126779	2019	Lombardy	0	1	Not available	2907592	2885261	99.23	92	40050	Pan-S		4.4.1.1	S-type	ungrouped	S	S	S	S
IT1295	SRR29126308	2019	Lombardy	1	1	Not available	2834745	2804979	98.95	90	28914	Pan-S		1.1.3	EAI	ungrouped	S	S	S	S
IT1296	SRR29126307	2019	Lombardy	0	1	Not available	3209238	3180676	99.11	102	30232	Pan-S		4.1.2.1	Haarlem	ungrouped	S	S	S	S
IT1297	SRR29126301	2019	Lombardy	1	0	Not available	3495207	3465065	99.14	110	27714	Mono-INH	katG:Ser315Thr	4.3.3	LAM	group_251	R	S	S	S
IT1298	SRR29126300	2019	Lombardy	1	0	Not available	2588162	2542644	98.24	82	22228	Pan-S		4.8	mainly T	ungrouped	S	S	S	S
IT1300	SRR29126297	2019	Lombardy	1	0	Not available	3942450	3893090	98.75	121	16357	Other	rpsL:Lys88Arg	1.2.1	EAI Manila	ungrouped	S	S	S	S
IT1301	SRR29126296	2019	Lombardy	1	0	Not available	3142626	3113078	99.06	100	14276	Pan-S		4.1.1	X-type	ungrouped	S	S	S	S
IT1304	SRR29126293	2019	Lombardy	1	0	Not available	2774909	2736875	98.63	88	45839	Pan-S		4.1.2.1	Haarlem	ungrouped	S	S	S	S
IT1305	SRR29126292	2019	Lombardy	1	0	Not available	2846792	2811317	98.75	88	29853	Mono-INH	katG:Ser315Thr	4.3.3	LAM	group_251	R	S	S	S
IT1306	SRR29126291	2019	Lombardy	1	0	Not available	3226795	3184534	98.69	101	30967	Pan-S		1.1.2	EAI	group_97	S	S	S	R
IT1308	SRR29126289	2019	Lombardy	1	0	Not available	3467325	3406122	98.23	107	24914	Pan-S		4.2.2	Euro-American	group_131	S	S	S	S
IT1309	SRR29126288	2019	Lombardy	1	0	Not available	3637408	3597183	98.89	113	23412	Pan-S		4.1.1.3	X-type	group_162	S	S	S	S
IT1310	SRR29126287	2019	Lombardy	1	1	Not available	3741199	3633158	97.11	107	14225	Pan-S		4.3.1	LAM	ungrouped	S	S	S	S
IT1313	SRR29127138	2018	Lombardy	0	Not available	Not available	2044073	1874865	91.72	59	24749	pre_XDR	embB:Met306Ile, fabG1_ups:C-15T- 1673425, gyrA: Asp94Tyr, katG:Ser315Thr, pncA:Ala146Val, rpoB:Ser450Leu	4.8	mainly T	group_230	R	R	S	R	R	S			S	S	S	S
IT1314	SRR29127109	2018	Lombardy	1	1	Not available	2594052	2566418	98.93	81	16063	Pan-S		1.2.1	EAI Manila	ungrouped	S	S	S	S
IT1315	SRR29127108	2018	Lombardy	1	Not available	Not available	2609213	2567947	98.42	81	29393	Pan-S		4.8	mainly T	ungrouped	S	S	S	S
IT1316	SRR29127106	2018	Lombardy	1	0	Not available	3640622	3610932	99.18	116	28303	Pan-S		4.3	LAM	group_151	S	S	S	S
IT1317	SRR29127105	2018	Lombardy	1	0	Not available	3232167	3170337	98.09	102	49265	Pan-S		4.6.2.2	Cameroon	ungrouped	S	S	S	S
IT1318	SRR29127104	2018	Lombardy	1	0	Not available	3277970	3230258	98.54	102	13924	Pan-S		3	Delhi-CAS	ungrouped	S	S	S	S
IT1319	SRR29127103	2018	Lombardy	1	Not available	Not available	2730224	2705201	99.08	86	57931	Pan-S		4.3.4.2	LAM	group_177	S	S	S	S
IT1320	SRR29126886	2018	Lombardy	1	0	Not available	2565918	2537496	98.89	78	25039	Pan-S		4.1.1.3	X-type	group_162	S	S	S	S
IT1321	SRR29126885	2018	Lombardy	0	0	Not available	2669445	2642929	99.01	83	16928	Pan-S		4.1.2.1	Haarlem	ungrouped	S	S	S	S
IT1322	SRR29126883	2018	Lombardy	1	1	Not available	3839831	3788025	98.65	116	16376	Pan-S		3.1.2	Delhi-CAS	ungrouped	S	S	S	S
IT1323	SRR29126882	2018	Lombardy	0	0	Not available	2784624	2735156	98.22	81	17624	Pan-S		4.2.1	Ural	ungrouped	S	S	S	S
IT1324	SRR29126881	2018	Lombardy	0	0	Not available	2309407	2286687	99.02	69	29829	Pan-S		4.1.2.1	Haarlem	ungrouped	S	S	S	S
IT1325	SRR29126879	2018	Lombardy	1	0	Not available	3084537	3046490	98.77	93	21356	Pan-S		4.1.2.1	Haarlem	group_142	S	S	S	S
IT1326	SRR29126878	2018	Lombardy	1	1	Not available	2779188	2735776	98.44	81	22552	Pan-S		4.1	Euro-American	group_252	S	S	S	S
IT1328	SRR29126876	2018	Lombardy	1	Not available	Not available	3030589	2967752	97.93	93	15408	Pan-S		3	Delhi-CAS	ungrouped	S	S	S	S
IT1329	SRR29126875	2018	Lombardy	1	0	Not available	1972864	1950893	98.89	60	16281	Pan-S		1.2.1	EAI Manila	ungrouped	S	S	S	S
IT1330	SRR29126874	2018	Lombardy	1	0	Not available	2213915	2187526	98.81	70	26929	Pan-S		1.1.2	EAI	ungrouped	S	S	S	R
IT1331	SRR29126873	2018	Lombardy	1	0	Not available	3225357	3182098	98.66	98	34943	Pan-S		1.2.1	EAI Manila	ungrouped	S	S	S	S
IT1332	SRR29126872	2018	Lombardy	1	Not available	Not available	2206079	2178472	98.75	67	50370	pre_XDR	embB:Met306Val, gyrA: Asp94Gly, katG: Ser315Thr, rpoB:Ser450Leu, rpsL:Lys43Arg, rrs:1473246_A>G_SNP, thyA:Arg222Gly	2.2.1	Beijing	group_79	R	R	R	R		R		R	S
IT1333	SRR29126871	2018	Lombardy	1	Not available	Not available	3654524	3613433	98.88	112	20624	pre_XDR	embB:Met306Ile, fabG1_ups:C-15T- 1673425, gyrA: Asp94Tyr, katG:Ser315Thr, pncA:Ala146Val, rpoB:Ser450Leu	4.8	mainly T	group_230	R	R	R	R
IT1334	SRR29126870	2018	Lombardy	1	Not available	Not available	2608626	2574375	98.69	81	28000	Pan-S		4.1.1.3	X-type	group_162	S	S	S	S
IT1335	SRR29126868	2018	Lombardy	1	0	Not available	3058997	3017408	98.64	92	34673	Pan-S		1.1.3	EAI	ungrouped	S	S	S	S
IT1336	SRR29126867	2018	Lombardy	1	0	Not available	2556922	2534363	99.12	81	33488	Pan-S		4.1.2.1	Haarlem	ungrouped	S	S	S	S
IT1337	SRR29126864	2018	Lombardy	0	0	Not available	2546460	2286273	89.78	70	14938	Pan-S		4.8	mainly T	ungrouped	S	S	S	S
IT1338	SRR29126863	2018	Lombardy	1	0	Not available	3719138	2929399	78.77	89	36804	Pan-S		2.2.1	Beijing	ungrouped	S	S	S	S
IT1339	SRR29126862	2018	Lombardy	1	0	Not available	2890222	2785374	96.37	85	23786	Pan-S		4.1.1.1	X-type	ungrouped	S	S	S	S
IT1340	SRR29126861	2018	Lombardy	0	0	Not available	2091157	2057893	98.41	65	35656	Pan-S		4.1.2.1	Haarlem	ungrouped	S	S	S	S
IT1341	SRR29126363	2018	Lombardy	1	0	Not available	3804303	3765077	98.97	113	45647	pre_XDR	embB:Met306Val, gyrA: Asp94Gly, katG:Ser315Thr, rpoB:Ser450Leu , rpsL:Lys43Arg, rrs:1473246_A>G_SNP, thyA:Arg222Gly	2.2.1	Beijing	group_79	R	R	R	S
IT1363	SRR29124292	2019	Lombardy	0	0	Not available	2799801	2771264	98.98	89	25582	Pan-S		4.1.2.1	Haarlem	ungrouped	S	S	S	S	S	S	S	S			S
IT1364	SRR29126377	2019	Lombardy	1	0	Not available	2498083	2459344	98.45	79	11756	MDR	embB:Ser297Ala, fabG1_ups:C-15T- 1673425, katG:Ser315Thr, rpoB:Ser450Leu, rpsL:Lys88Arg	4.2.1	Ural	ungrouped	R	R	S	S		S		R	S
IT1365	SRR29126320	2018	Lombardy	1	0	Not available	2728008	2693070	98.72	86	24872	XDR	embB:Met306Ile, fabG1_ups:C-15T- 1673425, gyrA: Asp94Tyr, katG:Ser315Thr, pncA:Ala146Val, rpoB:Ser450Leu, Rv0678_212bp_Del, Rv0678_Ala59Val	4.8	mainly T	group_230	R	R	R	R								R
IT1385	SRR29126839	2018	Lombardy	1	1	Not available	3261317	3178923	97.47	101	24882	Pan-S		4.3.1	LAM	ungrouped	S	S	S	S
IT1388	SRR29126838	2018	Lombardy	1	0	Not available	4460564	4215543	94.51	126	17460	Pan-S		4.1	Euro-American	ungrouped	S	S	S	S
IT1389	SRR29126837	2018	Lombardy	1	1	Not available	3714995	3637512	97.91	116	61459	Pan-S		4.3.4.2	LAM	ungrouped	S	S	S	S
IT1390	SRR29126836	2018	Lombardy	1	1	Not available	4257455	4103732	96.39	123	27175	Pan-S		4.8	mainly T	group_190	S	S	S	S
IT1393	SRR29126835	2018	Lombardy	1	0	Not available	2521801	2487442	98.64	75	23491	Pan-S		4.8	mainly T	group_118	S	S	S	S
IT1396	SRR29126834	2018	Lombardy	0	0	Not available	3579909	3338379	93.25	97	18679	Pan-S		4.1.2.1	Haarlem	ungrouped	S	S	S	S
IT1401	SRR29126832	2018	Lombardy	1	0	Not available	1925582	1804787	93.73	55	41166	Pan-S		4.3.3	LAM	ungrouped	S	S	S	S
IT1402	SRR29126824	2018	Lombardy	1	0	Not available	1687645	1665709	98.7	51	31751	Pan-S		4.3.3	LAM	ungrouped	S	S	S	S
IT1403	SRR29126825	2018	Lombardy	1	0	Not available	2979768	2954306	99.15	91	18787	Pan-S		4.8	mainly T	ungrouped	S	S	S	S
IT1404	SRR29126326	2018	Lombardy	1	0	Not available	3646591	3609042	98.97	108	24303	Pan-S		4.3.3	LAM	ungrouped	S	S	S	S
IT1407	SRR29126823	2018	Lombardy	1	0	Not available	2748030	2717495	98.89	83	24488	Pan-S		4.1.2.1	Haarlem	ungrouped	S	S	S	S
IT1408	SRR29126314	2018	Lombardy	1	0	Not available	2039620	2006356	98.37	64	39866	Pan-S		4.1.2.1	Haarlem	ungrouped	S	S	S	S
IT1409	SRR29126312	2018	Lombardy	1	1	Not available	3217242	3155697	98.09	96	27515	Poly-resistant	fabG1_ups:C-15T- 1673425, rpsL:Lys88Arg	1.1.2	EAI	ungrouped	R	S	S	R
IT1410	SRR29126311	2018	Lombardy	1	0	Not available	1554770	1504725	96.78	46	33485	Pan-S		4.1.2.1	Haarlem	group_5	S	S	S	S
IT1411	SRR29126721	2018	Lombardy	1	1	Not available	3515368	3421322	97.32	106	30015	Pan-S		4.1.2.1	Haarlem	ungrouped	S	S	S	S
IT1412	SRR29126719	2018	Lombardy	1	0	Not available	3296345	3213890	97.5	101	25010	Pan-S		4.1.2.1	Haarlem	ungrouped	S	S	S	S
IT1413	SRR29126718	2018	Lombardy	0	0	Not available	3566822	3446931	96.64	104	17721	Pan-S		4.8	mainly T	ungrouped	S	S	S	S
IT1414	SRR29126717	2018	Lombardy	1	0	Not available	3659414	3577123	97.75	107	22823	Pan-S		4.1	Euro-American	group_252	S	S	S	S
IT1417	SRR29126315	2018	Lombardy	1	0	Not available	4649661	4104852	88.28	126	23676	Pan-S		4.3.3	LAM	group_140	S	S	S	S
IT1418	SRR29126715	2018	Lombardy	0	0	Not available	2942626	2895098	98.38	84	47961	Pan-S		4.6.2.2	Cameroon	group_221	S	S	S	S
IT1422	SRR29126712	2018	Lombardy	1	0	Not available	3515604	3459684	98.41	105	18450	Pan-S		3.1.2	Delhi-CAS	group_238	S	S	S	S
IT1423	SRR29126711	2018	Lombardy	1	0	Not available	3469108	3394974	97.86	107	15837	Pan-S		4.8	mainly T	ungrouped	S	S	S	S
IT1424	SRR29126713	2018	Lombardy	1	0	Not available	2904805	2863222	98.57	91	21999	Pan-S		4.8	mainly T	group_96	S	S	S	S
IT1425	SRR29126694	2018	Lombardy	1	0	Not available	2998885	2954220	98.51	94	20449	Poly-resistant	fabG1_ups:T-8C- 1673432, katG:Ser315Thr	4.1	Euro-American	ungrouped	R	S	S	S
IT1426	SRR29126702	2018	Lombardy	1	0	Not available	2930242	2891593	98.68	89	22612	Pan-S		3	Delhi-CAS	group_254	S	S	S	S
IT1427	SRR29126700	2018	Lombardy	1	0	Not available	3759540	3687451	98.08	110	32737	Pan-S		4.1.2.1	Haarlem	ungrouped	S	S	S	S
IT1429	SRR29126318	2018	Lombardy	1	0	Not available	3151324	3102395	98.45	98	23408	Pan-S		3	Delhi-CAS	ungrouped	S	S	S	S
IT1430	SRR29126877	2018	Lombardy	0	Not available	Not available	2128326	2109974	99.14	64	41829	pre_XDR	embA_ups:C-12T- 4243221, embB:Tyr334His, fabG1_ups:C-15T- 1673425, gyrA: Asp94Gly , katG:Ser315Thr, pncA:Val155Gly, rpoB:Ser450Leu, rpsL:Lys88Arg	2.2.1	Beijing	ungrouped	R	R
IT1431	SRR29126857	2018	Lombardy	0	0	Not available	4549390	4146293	91.14	123	23814	Pan-S		4.8	mainly T	ungrouped	S	S	S	S
IT1432	SRR29126856	2018	Lombardy	0	0	Not available	5273312	4723628	89.58	136	13661	Pan-S		4.8	mainly T	ungrouped	S	S	S	R
IT1433	SRR29126855	2018	Lombardy	0	0	Not available	3202774	3173519	99.09	93	40487	Pan-S		2.2.1	Beijing	group_212	S	S	S	S
IT1434	SRR29126724	2018	Lombardy	0	0	Not available	2277807	2248674	98.72	67	42556	Pan-S		2.2.1	Beijing	group_212	S	S	S	S
IT1435	SRR29126323	2018	Lombardy	1	0	Not available	3535249	3424944	96.88	107	23646	Pan-S		4.7	mainly T	ungrouped	S	S	S	S
IT1436	SRR29126317	2018	Lombardy	1	0	Not available	2676400	2580701	96.42	79	17400	Other	rrs:1472337_C>T_SNP	4.3.2	LAM	ungrouped	S	S	S	S
IT1437	SRR29126316	2018	Lombardy	1	0	Not available	3314597	3272270	98.72	99	17383	Pan-S		4.7	mainly T	ungrouped	S	S	S	S
IT1438	SRR31008950	2018	Lombardy	1	0	Not available	2489226	2424069	97.38	78	89676	Other	pncA:His57Asp	M. bovis	M. bovis	ungrouped	S	S	S	R
IT1439	SRR29126716	2018	Lombardy	1	0	Not available	2933047	2863145	97.62	91	57889	Pan-S		4.3.4.2	LAM	group_263	S	S	S	S
IT1440	SRR29126708	2018	Lombardy	1	0	Not available	2667375	2634308	98.76	82	14996	Pan-S		4.8	mainly T	group_42	S	S	S	S
IT1441	SRR29126707	2018	Lombardy	1	0	Not available	3104700	3057367	98.48	90	38156	Other	rpsL:Lys43Arg	2.2.1	Beijing	ungrouped	S	S	S	S
IT1442	SRR29126706	2018	Lombardy	1	0	Not available	3280123	3189706	97.24	101	25152	Pan-S		4.2.2	Euro-American	ungrouped	S	S	S	S
IT1443	SRR29126705	2018	Lombardy	1	0	Not available	2695125	2655269	98.52	81	21870	Pan-S		2.2.1	Beijing	ungrouped	S	S	S	S
IT1444	SRR29126704	2018	Lombardy	1	0	Not available	3322064	3278706	98.69	100	45368	Mono-INH	katG:Ser315Thr	2.2.1	Beijing	ungrouped	R	S	S	S
IT1445	SRR29126701	2018	Lombardy	1	0	Not available	2385868	2320763	97.27	72	27232	Pan-S		4.1.2.1	Haarlem	ungrouped	S	S	S	S
IT1446	SRR29126697	2018	Lombardy	1	0	Not available	2594627	2491542	96.03	77	35797	Pan-S		4.3.1	LAM	group_214	S	S	S	S
IT1447	SRR29126696	2018	Lombardy	1	0	Not available	2030223	2000141	98.52	63	41722	Pan-S		2.2.1	Beijing	ungrouped	S	S	S	S
IT1451	SRR31008685	2018	Lombardy	1	0	Not available	2200914	2134380	96.98	68	87057	Other	pncA:His57Asp	M. bovis	M. bovis	ungrouped	S	S	S	R
IT1452	SRR29124293	2019	Lombardy	0	0	Not available	2818192	2791204	99.04	86	24020	XDR	embB:Met306Ile, fabG1_ups:C-15T- 1673425, gyrA: Asp94Tyr, katG:Ser315Thr, pncA:Ala146Val, rpoB:Ser450Leu, Rv0678_435bp_Del	4.8	mainly T	group_230	R	R	R	R			R	S			R	R
IT1466	SRR29126303	2018	Lombardy	0	0	Not available	2703546	2641716	97.71	83	26631	Pan-S		4.8	mainly T	ungrouped	S	S	S	S
IT1468	SRR29126789	2019	Lombardy	1	0	Not available	1990617	1966210	98.77	63	21727	Mono-INH	fabG1_ups:G-17T- 1673423	4	Euro-American	group_64	R	R	S	S
IT1470	SRR31008674	2018	Lombardy	0	0	Not available	4239714	4124357	97.28	123	114111	Other	pncA:His57Asp	M. bovis	M. bovis	group_23	S	S	S	R
IT1471	SRR29126306	2018	Lombardy	0	0	Not available	3247104	3158692	97.28	97	26250	Pan-S		4.3.3	LAM	ungrouped	S	S	S	S
IT1472	SRR29126854	2018	Lombardy	1	0	Not available	5761208	5315178	92.26	144	52203	Pan-S		4.3.4.2	LAM	ungrouped	S	S	S	S
IT1473	SRR29126783	2019	Lombardy	1	0	Not available	2717389	2680642	98.65	83	44655	MDR	embB:Met306Val , katG: Ser315Thr, rpoB:Ser450Leu, rpsL:Lys43Arg	2.2.2	Beijing	ungrouped	R	R	R	R		S	S	S	S
IT1475	SRR29126324	2018	Lombardy	1	0	Not available	5394963	5071065	94	135	52790	Pan-S		6	West-Africa 2	ungrouped	S	S	S	S
IT1476	SRR29126325	2018	Lombardy	1	1	Not available	4344115	4236170	97.52	130	54676	Pan-S		6	West-Africa 2	ungrouped	S	S	S	S
IT1477	SRR29126321	2018	Lombardy	1	0	Not available	3580042	3484394	97.33	110	56283	Pan-S		4.3.4.2	LAM	ungrouped	S	S	S	S
IT1479	SRR29126791	2018	Lombardy	1	0	Not available	6102100	5672924	92.97	155	34386	Pan-S		4.1.2.1	Haarlem	group_2	S	S	S	S
IT1481	SRR31008663	2018	Lombardy	0	1	Not available	2507949	2487522	99.19	77	118082	Other	pncA:His57Asp	M. bovis	M. bovis	group_23	S	S	S	R
IT1483	SRR29126304	2018	Lombardy	0	0	Not available	2086854	2054490	98.45	61	15524	Pan-S		4.1.2	Euro-American	group_203	S	S	S	S
IT1484	SRR29127048	2018	Lombardy	1	1	Not available	4568606	4497060	98.43	142	53541	Pan-S		6	West-Africa 2	ungrouped	S	S	S	S
IT1485	SRR31008652	2018	Lombardy	1	1	Not available	2427682	2379423	98.01	76	112601	Other	pncA:His57Asp	M. bovis	M. bovis	group_48	S	S	s	R
IT1488	SRR29126792	2018	Lombardy	1	0	Not available	2481908	2347599	94.59	72	28736	Pan-S		4.1.2.1	Haarlem	group_115	S	S	S	S
IT1490	SRR29127039	2018	Lombardy	1	1	Not available	3399399	3301456	97.12	99	19563	Pan-S		4.1.2.1	Haarlem	ungrouped	S	S	S	S
IT1491	SRR29127045	2018	Lombardy	0	0	Not available	3781240	3705945	98.01	116	32234	Pan-S		4.1.2.1	Haarlem	ungrouped	S	S	S	S
IT1492	SRR29127050	2018	Lombardy	1	0	Not available	3520583	3440243	97.72	107	38962	Pan-S		4.1.2.1	Haarlem	group_2	S	S	S	S
IT1493	SRR29127040	2018	Lombardy	0	1	Not available	2649579	2565798	96.84	78	21561	Pan-S		4.1.2.1	Haarlem	ungrouped	S	S	S	S
IT1495	SRR29127038	2018	Lombardy	1	0	Not available	3332798	3277671	98.35	103	13535	Pan-S		4.8	mainly T	ungrouped	S	S	S	S
IT1496	SRR29126793	2018	Lombardy	1	0	Not available	2626454	2573062	97.97	80	37414	Pan-S		1.2.1	EAI Manila	ungrouped	S	S	S	S
IT1497	SRR29126802	2018	Lombardy	1	0	Not available	3576277	3524843	98.56	107	23131	Pan-S		4.2.2	Euro-American	ungrouped	S	S	S	S
IT1501	SRR29126797	2018	Lombardy	0	1	Not available	3379823	3324850	98.37	105	24025	Pan-S		4.8	mainly T	ungrouped	S	S	S	S
IT1504	SRR29126795	2019	Lombardy	1	0	Not available	2909446	2870910	98.68	89	21898	Pan-S		3	Delhi-CAS	ungrouped	s	s	s	s
IT1505	SRR29126794	2018	Lombardy	1	0	Not available	1513921	1491311	98.51	47	33243	Pan-S		4.1.2.1	Haarlem	group_5	s	s	s	s
IT1507	SRR29124298	2019	Lombardy	1	1	Not available	2463062	2431685	98.73	76	16249	pre_XDR	embB:Met306Leu, gyrA:Asp94Gly Ser315Thr, katG:Ser450Leu , rpoB:1472362_C>T_SNP	3.1.2.1	Delhi-CAS	ungrouped	R	R	S	S		S	R	S	S
IT1508	SRR29124291	2019	Lombardy	0	0	Not available	3331576	3299398	99.03	105	23331	XDR	embB:Met306Ile, fabG1_ups:C-15T- 1673425, gyrA: Asp94Tyr, katG:Ser315Thr, pncA:Ala146Val, rpoB:Ser450Leu, Rv0678_779012_A_Del	4.8	mainly T	group_230	R	R	R	R								R
IT1510	SRR29126860	2019	Lombardy	1	0	Not available	4393753	4260257	96.96	125	18590	Pan-S		4.1.2.1	Haarlem	ungrouped	S	S	S	S
IT1511	SRR31008497	2019	Lombardy	1	0	Not available	3409174	3373852	98.96	104	96421	Other	pncA:His57Asp	M. bovis	M. bovis	group_4	S	S	S	R
IT1512	SRR29126853	2019	Lombardy	1	0	Not available	2806488	2769077	98.67	85	20275	Pan-S		4.8	mainly T	ungrouped	S	S	S	S
IT1513	SRR29126851	2019	Lombardy	1	0	Not available	3608497	3575466	99.08	110	35660	Pan-S		2.2.1	Beijing	ungrouped	S	S	S	S
IT1514	SRR29126731	2018	Lombardy	0	0	Not available	1518485	1491808	98.24	46	35601	Pan-S		4.1.2.1	Haarlem	ungrouped	S	S	S	S
IT1516	SRR31008486	2018	Lombardy	0	0	Not available	2785434	2740821	98.4	89	80529	Other	pncA:His57Asp	M. bovis	M. bovis	ungrouped	S	S	S	R
IT1517	SRR29126726	2018	Lombardy	0	0	Not available	3605204	3550738	98.49	111	24765	Pan-S		4.7	mainly T	ungrouped	S	S	S	S
IT1518	SRR29126725	2018	Lombardy	1	0	Not available	3567710	3518166	98.61	108	22984	Pan-S		4.1.2.1	Haarlem	ungrouped	S	S	S	S
IT1519	SRR29126826	2018	Lombardy	1	1	Not available	3080822	3042679	98.76	90	26863	Pan-S		3	Delhi-CAS	ungrouped	S	S	S	S
IT1520	SRR29126322	2018	Lombardy	0	1	Not available	3096398	3052036	98.57	97	26172	Pan-S		4.1.2.1	Haarlem	ungrouped	S	S	S	S
IT1521	SRR29126310	2019	Lombardy	0	0	Not available	3507523	3474960	99.07	109	26079	Pan-S		4.1.1.3	X-type	group_162	S	S	S	S
IT1522	SRR29126714	2019	Lombardy	0	0	Not available	3209755	3156044	98.33	101	58140	Pan-S		4.3.4.2	LAM	group_263	S	S	S	S
IT1523	SRR29126710	2019	Lombardy	1	0	Not available	2773995	2679248	96.58	81	13363	Pan-S		1.2.1	EAI Manila	ungrouped	S	S	S	S
IT1524	SRR29126703	2019	Lombardy	1	0	Not available	2515609	2477612	98.49	78	18334	Pan-S		4.3.1	LAM	ungrouped	S	S	S	S
IT1525	SRR29126699	2019	Lombardy	0	0	Not available	3000242	2969377	98.97	94	25226	Pan-S		4.1.2.1	Haarlem	ungrouped	S	S	S	S
IT1526	SRR29126695	2019	Lombardy	1	0	Not available	3322123	3282076	98.79	103	22675	Other	rrs:1472337_C>T_SNP	4.3.2	LAM	ungrouped	S	S	S	S
IT1527	SRR29126693	2019	Lombardy	1	0	Not available	3507178	3390014	96.66	104	23541	Pan-S		1.1.2	EAI	ungrouped	S	S	S	S
IT1528	SRR29126692	2019	Lombardy	0	0	Not available	2963999	2918935	98.48	91	22258	Pan-S		4.4.1.1	S-type	ungrouped	S	S	S	S
IT1529	SRR29124294	2019	Lombardy	1	0	Not available	5576309	5504383	98.71	177	23921	Poly-resistant	fabG1_ups:C-15T- 1673425, pncA:His51Arg	4.3.3	LAM	group_176	R	S
IT1530	SRR29124296	2019	Lombardy	1	0	Not available	4373631	4337550	99.18	141	26181	MDR	embB:Tyr319Ser, katG:Ser315Thr, pncA:Gln10Arg, rpoB:Asp435Val	4.3.3	LAM	ungrouped	R	R	R	R	S	S	S		S
IT1531	SRR29124295	2019	Lombardy	1	0	Not available	3566436	3526029	98.87	116	40065	pre_XDR	embB:Met306Ile, gyrA:Ala90Val, katG:Ser315Thr, rpoB:Ser450Leu, rrs:1472362_C>T_SNP	2.2.1	Beijing	ungrouped	R	R			S	S
IT1691	SRR29127042	2018	Lombardy	0	0	Not available	3351545	3261139	97.3	97	28481	Pan-S		4.1.2.1	Haarlem	ungrouped	S	S	S	S
IT1695	SRR29127041	2018	Lombardy	1	0	Not available	2506429	2484380	99.12	75	53058	Pan-S		4.6.2.2	Cameroon	group_246	S	S	S	S
IT1696	SRR29127044	2018	Lombardy	1	0	Not available	1801854	1783481	98.98	53	25631	Pan-S		4.1.2.1	Haarlem	ungrouped	S	S	S	S
IT1697	SRR29127043	2018	Lombardy	0	0	Not available	2765788	2744589	99.23	81	59489	Pan-S		4.3.4.2	LAM	ungrouped	S	S	S	S
IT1698	SRR31008475	2019	Lombardy	Not available	Not available	Not available	2659284	2619667	98.51	78	15483	Pan-S		1.2.1	EAI Manila	group_159	S	S
IT1701	SRR29127047	2018	Lombardy	1	0	Not available	3379298	3345946	99.01	99	37492	Pan-S		4.1.2.1	Haarlem	group_2	S	S	S	S
IT1702	SRR29126884	2019	Lombardy	1	0	Not available	3514252	3423515	97.42	101	23335	Pan-S		1.1.3	EAI	ungrouped	S	S	S	S
IT1703	SRR29126809	2018	Lombardy	1	0	Not available	2535180	2513140	99.13	77	35263	Pan-S		3	Delhi-CAS	ungrouped	S	S	S	S
IT1704	SRR29126810	2018	Lombardy	1	0	Not available	3733003	3663634	98.14	107	13407	Pan-S		4.8	mainly T	ungrouped	S	S	S	S
IT1710	SRR29124303	2018	Lombardy	1	0	Not available	2249417	2225351	98.93	70	25656	Pan-S		4.1.2.1	Haarlem	ungrouped	S	S	S	S
IT1711	SRR29124302	2018	Lombardy	1	0	Not available	2323437	2298277	98.92	72	27142	Pan-S		4.3.3	LAM	ungrouped	S	S
IT1712	SRR29124301	2018	Lombardy	1	0	Not available	2636309	2613488	99.13	82	21195	Pan-S		4.8	mainly T	group_98	S	S
IT1781	SRR29126808	2018	Lombardy	0	0	Not available	3707942	3649211	98.42	109	18080	Pan-S		3	Delhi-CAS	ungrouped	S	S	S	S
IT1782	SRR29127021	2018	Lombardy	1	0	Not available	2542587	2507501	98.62	78	52069	Pan-S		4.6.2.2	Cameroon	group_221	S	S	S	S
IT1783	SRR29126222	2018	Lombardy	1	0	Not available	2876702	2839300	98.7	87	28832	Pan-S		4.3.3	LAM	ungrouped	S	S	S	S
IT1784	SRR29126869	2018	Lombardy	1	0	Not available	4256574	4185230	98.32	127	52362	Pan-S		6	West-Africa 2	ungrouped	S	S	S	S
IT1785	SRR29126858	2018	Lombardy	1	0	Not available	4086869	4035603	98.75	121	27651	Pan-S		4.8	mainly T	ungrouped	S	S	S	S
IT1786	SRR29126356	2018	Lombardy	1	1	Not available	4790523	4699626	98.1	136	22805	Pan-S		1.1.3	EAI	ungrouped	S	S	S	S
IT1787	SRR29126822	2018	Lombardy	1	0	Not available	1976656	1951473	98.73	60	26293	Pan-S		4.2.2.1	TUR	ungrouped	S	S	S	S
IT1788	SRR29126341	2018	Lombardy	1	0	Not available	2765731	2726127	98.57	84	25272	Pan-S		4.1.2.1	Haarlem	ungrouped	S	S	S	S
IT1789	SRR29126330	2018	Lombardy	1	1	Not available	4874645	4796844	98.4	142	17713	Pan-S		4.1.2	Euro-American	ungrouped	S	S	S	S
IT1790	SRR29127009	2018	Lombardy	1	0	Not available	3888781	3828786	98.46	117	17344	Mono-INH	fabG1_ups:C-15T- 1673425	4.2.1	Ural	ungrouped	R	S	S	S
IT1791	SRR29126998	2018	Lombardy	1	0	Not available	4985038	4892117	98.14	145	13029	Pan-S		1.2.1	EAI Manila	ungrouped	S	S	S	S
IT1792	SRR29126496	2018	Lombardy	1	0	Not available	4363267	4300355	98.56	125	12832	Mono-INH	katG:Ser315Thr	4.9	H37Rv-like	ungrouped	R	S	S	S
IT1793	SRR29126269	2018	Lombardy	1	0	Not available	4542189	4468119	98.37	127	45906	Pan-S		4.6.2.2	Cameroon	group_221	S	S	S	S
IT1794	SRR29126482	2018	Lombardy	0	0	Not available	4638911	4572089	98.56	136	54089	Pan-S		4.3.4.2	LAM	ungrouped	S	S	S	S
IT1795	SRR29126737	2018	Lombardy	0	1	Not available	5552793	5465063	98.42	162	22094	Pan-S		4.8	mainly T	ungrouped	S	S	S	S
IT1796	SRR29127096	2018	Lombardy	0	0	Not available	5965771	5852472	98.1	166	32932	Other	rpsL:Lys43Arg	2.2.1	Beijing	group_242	S	S	S	S
IT1797	SRR29127097	2018	Lombardy	1	0	Not available	4172618	4093135	98.1	117	16781	Pan-S		4.5	Euro-American	ungrouped	S	S	S	S
IT1798	SRR29127095	2018	Lombardy	0	1	Not available	5057839	4973635	98.34	146	24869	Other	embB:Met306Ile	4.1.2.1	Haarlem	ungrouped	S	S	S	S
IT1799	SRR29126736	2018	Lombardy	0	0	Not available	3556155	3503701	98.52	105	28583	Pan-S		4.1.2	Euro-American	ungrouped	S	S	S	S
IT1800	SRR29126743	2018	Lombardy	1	1	Not available	4927671	4851787	98.46	143	16171	Pan-S		4.4.1.1	S-type	ungrouped	S	S	S	S
IT1801	SRR29127099	2018	Lombardy	1	0	Not available	4462932	4390333	98.37	132	18849	Pan-S		4.1.2.1	Haarlem	ungrouped	S	S	S	S
IT1802	SRR29127094	2018	Lombardy	1	0	Not available	4043397	3974140	98.29	117	45047	Pan-S		4.6.2.2	Cameroon	ungrouped	S	S	S	S
IT1803	SRR29127069	2018	Lombardy	0	0	Not available	4557506	4489111	98.5	134	17815	Pan-S		4.4.1.1	S-type	ungrouped	S	S	S	S
IT1804	SRR29127090	2018	Lombardy	1	0	Not available	3937672	3881115	98.56	117	22223	Pan-S		3	Delhi-CAS	ungrouped	S	S	S	S
IT1806	SRR29126435	2018	Lombardy	1	0	Not available	3369816	3323229	98.62	98	24750	Pan-S		4.3.3	LAM	ungrouped	S	S	S	S
IT1807	SRR29126698	2018	Lombardy	0	1	Not available	4840488	4769025	98.52	147	10988	Pan-S		3	Delhi-CAS	ungrouped	S	S	S	S
IT1808	SRR29126247	2018	Lombardy	0	0	Not available	5221297	5150368	98.64	154	18300	Pan-S		4.8	mainly T	ungrouped	S	S	S	S
IT1809	SRR29126687	2018	Lombardy	1	0	Not available	4177911	4111066	98.4	125	22487	Pan-S		4.1.2.1	Haarlem	ungrouped	S	S	S	S
IT1810	SRR29126258	2018	Lombardy	0	1	Not available	4738608	4662466	98.39	140	25277	Pan-S		4.3.3	LAM	ungrouped	S	S	S	S
IT1811	SRR29126742	2018	Lombardy	1	0	Not available	3438104	3391033	98.63	103	16018	Pan-S		4.8	mainly T	group_36	S	S	S	S
IT1812	SRR29126740	2018	Lombardy	0	0	Not available	3314421	3268308	98.61	99	62461	Pan-S		4.3.4.2	LAM	group_123	S	S	S	S
IT1813	SRR29126739	2018	Lombardy	1	0	Not available	4189240	4135752	98.72	126	11327	Pan-S		4.8	mainly T	ungrouped	S	S	S	S
IT1814	SRR29126738	2018	Lombardy	1	0	Not available	5643657	5527507	97.94	155	14783	Pan-S		1.2.1	EAI Manila	ungrouped	S	S	S	R
IT1815	SRR29126732	2018	Lombardy	1	1	Not available	4338084	4258215	98.16	124	30213	Mono-INH	fabG1_ups:C-15T- 1673425	4.6.2.2	Cameroon	ungrouped	R	S	S	S
IT1816	SRR29126727	2018	Lombardy	1	0	Not available	3990467	3937441	98.67	121	33442	Pan-S		4.3.3	LAM	ungrouped	S	S	S	S
IT1817	SRR29126722	2018	Lombardy	1	1	Not available	4226805	4150844	98.2	123	34571	Pan-S		2.2.1	Beijing	ungrouped	S	S	S	S
IT1818	SRR29127101	2018	Lombardy	0	0	Not available	4591493	4506227	98.14	127	32828	Pan-S		4.8	mainly T	ungrouped	S	S	S	S
IT1819	SRR29127098	2018	Lombardy	1	1	Not available	4797610	4680714	97.56	140	23770	Pan-S		1.2.1	EAI Manila	ungrouped	S	S	S	R
IT1820	SRR29127092	2018	Lombardy	1	0	Not available	3475281	3410955	98.15	97	33483	Pan-S		4.1.1.1	X-type	ungrouped	S	S	S	S
IT1822	SRR29126278	2019	Lombardy	1	0	Not available	3112533	3065406	98.49	91	29132	Pan-S		4.3.3	LAM	ungrouped	S	S	S	R
IT1828	SRR29126621	2019	Lombardy	0	0	Not available	2630373	2591277	98.51	78	24489	Pan-S		4.1.1.1	X-type	ungrouped	S	S	S	S
IT1829	SRR29126620	2019	Lombardy	1	1	Not available	2853101	2812535	98.58	82	23607	Pan-S		4.3.3	LAM	ungrouped	S	S	S	S
IT1830	SRR29126381	2018	Lombardy	0	0	Not available	2386860	2351940	98.54	71	26342	Pan-S		4.1.1.3	X-type	group_162	S	S	S	S
IT1831	SRR29127116	2018	Lombardy	1	0	Not available	3231981	3181142	98.43	91	28898	Pan-S		4.8	mainly T	group_189	S	S	S	S
IT1832	SRR29127100	2018	Lombardy	1	1	Not available	3616232	3570662	98.74	111	29982	Pan-S		3	Delhi-CAS	ungrouped	S	S	S	S
IT1833	SRR29127140	2018	Lombardy	1	1	Not available	3073965	3027622	98.49	94	19756	Pan-S		1.2.1	EAI Manila	ungrouped	S	S	S	S
IT1834	SRR29127102	2018	Lombardy	0	0	Not available	3477799	3428199	98.57	105	29586	Pan-S		4.7	mainly T	ungrouped	S	S	S	S
IT1835	SRR29126342	2018	Lombardy	1	0	Not available	3032909	2996814	98.81	94	31816	Pan-S		4.8	mainly T	ungrouped	S	S	S	S
IT1836	SRR29126637	2018	Lombardy	Not available	0	Not available	2665721	2627925	98.58	82	19094	Pan-S		4.1.2	Euro-American	group_220	S	S	S	S
IT1837	SRR29127117	2018	Lombardy	1	0	Not available	2364572	2331985	98.62	72	28268	Pan-S		4.8	mainly T	ungrouped	S	S	S	S
IT1838	SRR29126766	2018	Lombardy	Not available	1	Not available	2970364	2924076	98.44	91	21986	Pan-S		3	Delhi-CAS	group_254	S	S	S	S
IT1839	SRR29126866	2018	Lombardy	1	0	Not available	3300802	3258721	98.73	100	19445	Pan-S		4.8	mainly T	group_164	S	S	S	S
IT1840	SRR29126528	2018	Lombardy	1	0	Not available	2979048	2904586	97.5	86	22467	Pan-S		4.1.2.1	Haarlem	ungrouped	S	S	S	S
IT1841	SRR29126865	2018	Lombardy	0	0	Not available	3466872	3416512	98.55	103	13985	Pan-S		4.3.1	LAM	ungrouped	S	S	S	S
IT1842	SRR29127139	2018	Lombardy	1	1	Not available	2733112	2696070	98.64	83	22123	Pan-S		4.1.2.1	Haarlem	ungrouped	S	S	S	S
IT1843	SRR29127115	2018	Lombardy	0	0	Not available	3637655	3584627	98.54	112	17557	Pan-S		4.1.2	Euro-American	ungrouped	S	S	S	S
IT1845	SRR29126380	2018	Lombardy	0	0	Not available	3463265	3408183	98.41	103	18756	Pan-S		4.4.1.1	S-type	ungrouped	S	S	S	S
IT1846	SRR29126859	2018	Lombardy	0	0	Not available	4579491	4502907	98.33	133	55676	Mono-FQs	gyrA: Asp94Gly	4.3.4.2	LAM	ungrouped	S	S	S	S
IT1847	SRR29127113	2018	Lombardy	1	0	Not available	3141081	3095967	98.56	97	23346	Pan-S		4.1.2.1	Haarlem	ungrouped	S	S	S	S
IT1848	SRR29126575	2018	Lombardy	0	1	Not available	3219631	3173030	98.55	98	21045	Pan-S		4.1.2.1	Haarlem	ungrouped	S	S	S	S
IT1849	SRR29126756	2018	Lombardy	1	0	Not available	3034793	2981052	98.23	92	32581	Pan-S		1.1.1	EAI	ungrouped	S	S	S	R
IT1850	SRR29126387	2018	Lombardy	1	1	Not available	2942836	2904307	98.69	91	19367	Pan-S		4.8	mainly T	ungrouped	S	S	S	S
IT1851	SRR29127137	2018	Lombardy	0	0	Not available	2999684	2955160	98.52	92	31851	Pan-S		4.1.2.1	Haarlem	group_80	S	S	S	S
IT1852	SRR29126160	2018	Lombardy	1	0	Not available	3278026	3233283	98.64	101	21479	Pan-S		4.1.2.1	Haarlem	group_150	S	S	S	S
IT1855	SRR29126624	2019	Lombardy	Not available	1	Not available	3093713	3052746	98.68	95	12443	Pan-S		3.1.2	Delhi-CAS	group_227	S	S	S	S
IT1856	SRR29126623	2019	Lombardy	1	1	Not available	4281787	4219098	98.54	128	37463	Pan-S		2.2.1	Beijing	ungrouped	S	S	S	S
IT1857	SRR29126733	2018	Lombardy	1	0	Not available	7250770	7052233	97.26	168	13325	Pan-S		1.2.1	EAI Manila	ungrouped	S	S	S	S
IT1858	SRR29126901	2018	Lombardy	1	0	Not available	4153745	4094618	98.58	127	23787	Pan-S		4.1.1.3	X-type	group_162	S	S	S	S
IT1859	SRR29126622	2019	Lombardy	0	0	Not available	3690363	3639423	98.62	114	27460	Pan-S		4.1.2.1	Haarlem	group_5	S	S	S	S
IT1860	SRR29127112	2018	Lombardy	1	0	Not available	3459098	3412867	98.66	106	46469	Pan-S		4.6.2.2	Cameroon	group_76	S	S	S	S
IT1861	SRR29126749	2018	Lombardy	1	1	Not available	3431948	3367138	98.11	99	33941	Pan-S		2.2.1	Beijing	ungrouped	S	S	S	S
IT1862	SRR29127126	2018	Lombardy	0	0	Not available	4604994	4524960	98.26	135	35317	Pan-S		2.2.1	Beijing	ungrouped	S	S	S	S
IT1863	SRR29126539	2018	Lombardy	1	0	Not available	3343740	3296636	98.59	98	21766	Pan-S		4.3.3	LAM	ungrouped	S	S	S	S
IT1865	SRR29127111	2018	Lombardy	Not available	0	Not available	2849121	2804724	98.44	83	24874	Pan-S		4.1.2.1	Haarlem	ungrouped	S	S	S	S
IT1868	SRR29126174	2018	Lombardy	1	0	Not available	3014834	2976290	98.72	94	28111	Pan-S		4.1.1.3	X-type	group_162	S	S	S	S
IT1869	SRR29126900	2018	Lombardy	1	1	Not available	3002466	2962409	98.67	90	20185	Pan-S		4.4.1.1	S-type	ungrouped	S	S	S	S
IT1870	SRR29126542	2018	Lombardy	0	0	Not available	2787906	2749498	98.62	85	24572	Pan-S		4.1.2.1	Haarlem	ungrouped	S	S	S	S
IT1871	SRR29127020	2018	Lombardy	0	0	Not available	3363566	3319380	98.69	102	14047	Pan-S		4.8	mainly T	group_264	S	S	S	S
IT1872	SRR29127134	2018	Lombardy	1	0	Not available	2450898	2417050	98.62	75	24323	Pan-S		4.1.2.1	Haarlem	ungrouped	S	S	S	S
IT1873	SRR29127122	2018	Lombardy	0	0	Not available	3210187	3164900	98.59	98	21092	Pan-S		4.1.2.1	Haarlem	group_65	S	S	S	S
IT1874	SRR29126398	2018	Lombardy	1	0	Not available	2571999	2540233	98.76	79	35560	Pan-S		4.6.2.2	Cameroon	ungrouped	S	S	S	S
IT1876	SRR29126409	2018	Lombardy	1	0	Not available	4055159	3998811	98.61	123	38483	Pan-S		2.2.1	Beijing	ungrouped	S	S	S	S
IT1877	SRR29126564	2018	Lombardy	1	1	Not available	3815762	3765594	98.69	116	25472	Pan-S		4.3	LAM	group_151	S	S	S	S
IT1878	SRR29126889	2018	Lombardy	1	1	Not available	3803375	3748388	98.55	114	21114	Pan-S		4.1.2.1	Haarlem	ungrouped	S	S	S	S
IT1879	SRR29127133	2018	Lombardy	1	0	Not available	2847473	2810196	98.69	86	25618	Pan-S		4.7	mainly T	ungrouped	S	S	S	S
IT1880	SRR29126305	2018	Lombardy	1	1	Not available	3712791	3667354	98.78	114	54930	Pan-S		4.3.4.2	LAM	ungrouped	S	S	S	S
IT1881	SRR29126651	2018	Lombardy	1	0	Not available	3172522	3132776	98.75	97	13253	Pan-S		4.8	mainly T	group_42	S	S	S	S
IT1882	SRR29127082	2018	Lombardy	0	0	Not available	4344227	4280611	98.54	131	34957	Mono-FQs	gyrA: Asp94Ala	2.2.1	Beijing	group_258	S	S	S	S
IT1883	SRR29126807	2018	Lombardy	1	0	Not available	3799169	3746348	98.61	115	28044	Pan-S		4.1.2.1	Haarlem	group_224	S	S	S	S
IT1884	SRR29126844	2018	Lombardy	1	0	Not available	3592602	3534500	98.38	109	19253	Pan-S		1.2.1	EAI Manila	ungrouped	S	S	S	S
IT1885	SRR29126796	2018	Lombardy	0	0	Not available	2783770	2748389	98.73	85	27154	Pan-S		4.6.2	Euro-American	group_217	S	S	S	S
IT1886	SRR29126553	2018	Lombardy	1	1	Not available	3959854	3902675	98.56	120	21353	Pan-S		3	Delhi-CAS	group_254	S	S	S	S
IT1887	SRR29126912	2018	Lombardy	1	1	Not available	3130974	3088844	98.65	96	47386	Pan-S		4.6.2.2	Cameroon	group_76	S	S	S	S
IT1888	SRR29126757	2018	Lombardy	1	0	Not available	3968855	3909879	98.51	119	22497	Pan-S		4.1.2.1	Haarlem	group_104	S	S	S	S
IT1889	SRR29127142	2018	Lombardy	1	0	Not available	3603935	3559773	98.77	111	23781	Other	rrs:1472337_C>T_SNP	4.3.2	LAM	ungrouped	S	S	S	S
IT1890	SRR31008644	2018	Lombardy	0	1	Not available	3945071	3872457	98.16	113	105160	Other	pncA:His57Asp	M. bovis	M. bovis	group_48	S	S	S	R
IT1891	SRR29126471	2018	Lombardy	1	0	Not available	3717899	3661912	98.49	111	23556	Pan-S		4.1.1.3	X-type	group_162	S	S	S	S
IT1892	SRR29126274	2019	Lombardy	1	0	Not available	2870568	2825970	98.45	85	33304	Pan-S		4.1.2.1	Haarlem	ungrouped	S	S	S	S
IT1893	SRR29127057	2018	Lombardy	0	0	Not available	3346188	3309291	98.9	105	32910	Pan-S		4.3.3	LAM	ungrouped	S	S	S	S
IT1894	SRR29127035	2018	Lombardy	1	0	Not available	3047491	2993334	98.22	90	21333	Pan-S		3	Delhi-CAS	group_254	S	S	S	S
IT1895	SRR29126673	2018	Lombardy	1	0	Not available	3742890	3691997	98.64	114	19848	Other	rrs:1472337_C>T_SNP	4.3.2	LAM	ungrouped	S	S	S	S
IT1896	SRR29126785	2018	Lombardy	0	0	Not available	2588663	2554683	98.69	78	20767	Other	pncA:Trp68Arg	4.4.1.1	S-type	ungrouped	S	S	S	R
IT1897	SRR29126253	2019	Lombardy	0	0	Not available	2643319	2608753	98.69	81	23227	Pan-S		4.1.2.1	Haarlem	group_143	S	S	S	S
IT1898	SRR29126644	2019	Lombardy	1	1	Not available	3039934	2994070	98.49	89	20778	Pan-S		4.1.2.1	Haarlem	ungrouped	S	S
IT1899	SRR29126378	2018	Lombardy	1	1	Not available	3259435	3215906	98.66	98	25905	Pan-S		4.3.3	LAM	ungrouped	S	S	S	S
IT1900	SRR29127118	2018	Lombardy	1	0	Not available	3068588	3022420	98.5	92	23221	Pan-S		4.1.2.1	Haarlem	ungrouped	S	S	S	S
IT1901	SRR29127107	2018	Lombardy	1	0	Not available	3165167	3124375	98.71	94	6641	Pan-S		4.9	H37Rv-like	ungrouped	S	S	S	S
IT1902	SRR29126619	2019	Lombardy	0	0	Not available	3793589	3654043	96.32	110	10386	Pan-S		3	Delhi-CAS	group_163	S	S	S	S
IT1905	SRR29126772	2019	Lombardy	1	0	Not available	1719696	1698810	98.79	54	30912	Pan-S		4.1.1	X-type	ungrouped	S	S	S	S
IT1906	SRR29127004	2019	Lombardy	1	1	Not available	3266948	3201573	98	90	19200	Pan-S		3	Delhi-CAS	ungrouped	S	S	S	S
IT1907	SRR29126254	2019	Lombardy	0	0	Not available	2647674	2611864	98.65	79	13292	Pan-S		4.8	mainly T	ungrouped	S	S	S	S
IT1908	SRR29126775	2019	Lombardy	1	0	Not available	3304238	3253319	98.46	97	40599	Pan-S		2.2.1	Beijing	group_212	S	S	S	S
IT1909	SRR29126627	2019	Lombardy	1	0	Not available	2912895	2873893	98.66	87	21495	Pan-S		4.7	mainly T	ungrouped	S	S	S	S
IT1911	SRR29127000	2019	Lombardy	0	0	Not available	2438742	2406344	98.67	75	24257	Pan-S		4.1.2.1	Haarlem	ungrouped	S	S	S	S
IT1912	SRR29126643	2019	Lombardy	1	1	Not available	3370731	3185131	94.49	91	33253	Pan-S		3	Delhi-CAS	ungrouped	S	S	S	S
IT1913	SRR29126491	2019	Lombardy	1	0	Not available	1634816	1615797	98.84	51	40491	MDR	katG:Ser315Thr, rpoB:Ser450Leu	4.3.3	LAM	ungrouped	R	R	S	R
IT1914	SRR29126255	2019	Lombardy	1	0	Not available	2932260	2886614	98.44	87	19883	Pan-S		4.1.2.1	Haarlem	group_63	S	S	S	S
IT1916	SRR29126290	2019	Lombardy	1	1	Not available	2985154	2942366	98.57	88	10987	Pan-S		4.5	Euro-American	ungrouped	S	S	S	S
IT1919	SRR29127005	2019	Lombardy	1	0	Not available	2438245	2396973	98.31	74	33297	Pan-S		1.1.2	EAI	group_97	S	S	S	R
IT1920	SRR29126996	2019	Lombardy	0	0	Not available	1648072	1628103	98.79	50	10202	Pan-S		4.8	mainly T	ungrouped	S	S	S	S
IT1921	SRR29126995	2019	Lombardy	1	0	Not available	2152210	2117680	98.4	66	18159	Pan-S		1.2.1	EAI Manila	ungrouped	S	S	S	S
IT1924	SRR29126776	2019	Lombardy	1	1	Not available	2016303	1988258	98.61	62	36521	Pan-S		4.1.2.1	Haarlem	ungrouped	S	S	S	S
IT1925	SRR29126515	2019	Lombardy	0	0	Not available	2758438	2717290	98.51	84	14661	Pan-S		4.8	mainly T	group_264	S	S	S	S
IT1926	SRR29126512	2019	Lombardy	1	0	Not available	2953483	2908292	98.47	86	25512	Pan-S		4.3.3	LAM	ungrouped	S	S	S	S
IT1927	SRR29126511	2019	Lombardy	1	0	Not available	2256538	2223130	98.52	68	21152	Pan-S		4.1.2.1	Haarlem	group_69	S	S	S	S
IT1928	SRR29126510	2019	Lombardy	1	0	Not available	2927374	2883651	98.51	90	37951	Pan-S		4.1.2.1	Haarlem	group_2	S	S	S	S
IT1929	SRR29126257	2019	Lombardy	1	0	Not available	1805074	1779545	98.59	56	29132	Pan-S		4.1.2.1	Haarlem	ungrouped	S	S	S	S
IT1930	SRR29126250	2019	Lombardy	1	0	Not available	3166920	3112814	98.29	93	36876	Pan-S		2.2.1.1	Beijing	ungrouped	S	S	S	S
IT1931	SRR29126249	2019	Lombardy	1	1	Not available	1992514	1958228	98.28	60	22062	Pan-S		1.1.2	EAI	ungrouped	S	S	S	R
IT1932	SRR29126244	2019	Lombardy	0	1	Not available	2077810	2044840	98.41	62	25832	Pan-S		4.1.2.1	Haarlem	ungrouped	S	S	S	S
IT1933	SRR29126243	2019	Lombardy	1	0	Not available	2840225	2793318	98.35	85	22178	Pan-S		4.1.2.1	Haarlem	ungrouped	S	S	S	S
IT1934	SRR29126641	2019	Lombardy	0	1	Not available	2068215	2040401	98.66	62	15654	Pan-S		3	Delhi-CAS	ungrouped	S	S	S	S
IT1935	SRR29126626	2019	Lombardy	1	0	Not available	3676544	3605977	98.08	105	32252	Pan-S		2.2.1	Beijing	ungrouped	S	S	S	S
IT1936	SRR29126635	2019	Lombardy	0	0	Not available	2376642	2342107	98.55	71	14402	Pan-S		4.7	mainly T	ungrouped	S	S	S	S
IT1937	SRR29126617	2019	Lombardy	1	0	Not available	3001451	2953029	98.39	89	19912	Pan-S		4.1.2.1	Haarlem	ungrouped	S	S	S	S
IT1938	SRR29126616	2019	Lombardy	1	1	Not available	2398053	2362789	98.53	73	33978	Pan-S		3	Delhi-CAS	ungrouped	S	S	S	S
IT1939	SRR29126615	2019	Lombardy	1	0	Not available	1928181	1889612	98	57	17328	Mono-FQs	gyrA: Ala90Val	3	Delhi-CAS	ungrouped	S	S	S	S
IT1941	SRR29126242	2020	Lombardy	1	1	Not available	2436622	2399563	98.48	74	21096	Pan-S		4.1	Euro-American	group_170	S	S	S	S
IT1942	SRR29126630	2020	Lombardy	1	0	Not available	2979784	2931081	98.37	88	24069	Pan-S		4.1.2.1	Haarlem	group_5	S	S	S	S
IT1943	SRR29126245	2020	Lombardy	0	0	Not available	1917202	1888473	98.5	59	24640	Pan-S		4.1.2.1	Haarlem	ungrouped	S	S	S	S
IT1944	SRR29126642	2019	Lombardy	1	0	Not available	3754794	3689223	98.25	108	20982	Pan-S		4.7	mainly T	ungrouped	S	S	S	S
IT1945	SRR29126294	2018	Lombardy	1	0	Not available	2731460	2692078	98.56	85	25803	Pan-S		4.1.2.1	Haarlem	ungrouped	S	S	S	S
IT1946	SRR29127129	2018	Lombardy	0	0	Not available	4208208	4145697	98.51	124	8022	Pan-S		4.8	mainly T	ungrouped	S	S	S	S
IT1947	SRR29126367	2018	Lombardy	0	0	Not available	2461839	2423374	98.44	75	15989	Pan-S		4.2.1	Ural	ungrouped	S	S	S	S
IT1948	SRR29127141	2018	Lombardy	1	0	Not available	3191506	3145637	98.56	95	22271	Pan-S		4.8	mainly T	ungrouped	S	S	S	S
IT1949	SRR29126994	2019	Lombardy	0	1	Not available	2895878	2852851	98.51	88	18032	Pan-S		3	Delhi-CAS	group_92	S	S	S	R
IT1950	SRR29126773	2019	Lombardy	0	0	Not available	2923376	2873388	98.29	88	13056	Pan-S		1.2.1	EAI Manila	ungrouped	S	S	S	S
IT1951	SRR29126778	2019	Lombardy	1	0	Not available	3198725	3139658	98.15	91	25682	Pan-S		4.3.1	LAM	group_47	S	S	S	S
IT1952	SRR29126492	2019	Lombardy	1	0	Not available	2130278	2102437	98.69	65	23036	XDR	embB:Met306Ile, fabG1_ups:C-15T- 1673425, gyrA: Asp94Tyr, katG:Ser315Thr, pncA:Ala146Val, rpoB:Ser450Leu, Rv0678_Ala59Val	4.8	mainly T	group_230	R	R	R	R								R
IT1953	SRR29126646	2020	Lombardy	0	1	Not available	2376607	2343710	98.62	73	15735	Mono-FQs	gyrA: Ala90Val	4.1	Euro-American	ungrouped	S	S
IT1954	SRR29126241	2020	Lombardy	0	0	Not available	3337595	3283560	98.38	98	35480	Pan-S		2.2.1	Beijing	group_197	S	S
IT1955	SRR29126513	2019	Lombardy	1	0	Not available	4630765	4534423	97.92	128	20560	Pan-S		4.4.1.1	S-type	ungrouped	S	S	S	S
IT1956	SRR29126629	2020	Lombardy	1	0	Not available	3946198	3876257	98.23	114	26247	Pan-S		4.1.2.1	Haarlem	ungrouped	S	S	S	S
IT1957	SRR29126774	2019	Lombardy	1	1	Not available	2728011	2684105	98.39	82	17590	Pan-S		3	Delhi-CAS	ungrouped	S	S	S	S
IT1958	SRR29126514	2019	Lombardy	1	0	Not available	3265089	3203097	98.1	94	20397	Pan-S		1.1.2	EAI	ungrouped	S	S	S	S
IT1959	SRR29126240	2020	Lombardy	1	0	Not available	3248829	3201215	98.53	99	19740	Pan-S		4.8	mainly T	group_249	S	S
IT1960	SRR29126628	2020	Lombardy	1	0	Not available	3406317	3352273	98.41	102	11170	Pan-S		3.1.2	Delhi-CAS	group_227	S	S	S	S
IT1961	SRR29126516	2019	Lombardy	1	0	Not available	3236651	3190019	98.56	98	17163	Pan-S		4.8	mainly T	ungrouped	s	s	s	s
IT1967	SRR31008633	2020	Lombardy	0	1	Not available	2912761	2866661	98.42	87	107277	Other	pncA:His57Asp	M. bovis	M. bovis	group_48	S	S	S	R
IT1968	SRR29126256	2019	Lombardy	1	1	Not available	2760814	2726628	98.76	82	31299	Pan-S		4.7	mainly T	ungrouped	S	S	S	S
IT1969	SRR29126632	2020	Lombardy	0	0	Not available	2163133	2135843	98.74	65	46400	Mono-INH	katG:Ser315Thr	4.6.2.2	Cameroon	group_45	R	S	S	S
IT1970	SRR29126251	2019	Lombardy	0	1	Not available	2982607	2929777	98.23	82	24245	Pan-S		4.1.2.1	Haarlem	ungrouped	S	S	S	S	S
IT1971	SRR29126639	2019	Lombardy	0	0	Not available	2107821	2080145	98.69	63	19688	Pan-S		4.8	mainly T	ungrouped	S	S	S	S	S
IT1972	SRR29126777	2019	Lombardy	0	0	Not available	2229692	2200126	98.67	67	25115	Other	rrs:1472337_C>T_SNP	4.3.2	LAM	ungrouped	S	S	S	S
IT1973	SRR29126638	2019	Lombardy	1	0	Not available	1545717	1527999	98.85	48	21294	Pan-S		4.1.1.3	X-type	ungrouped	S	S	S	S
IT1974	SRR29126618	2019	Lombardy	0	0	Not available	1989254	1965446	98.8	61	27148	Pan-S		4.1.2.1	Haarlem	group_5	S	S	S	S
IT1975	SRR29126295	2019	Lombardy	1	0	Not available	2885043	2846527	98.66	86	36920	Pan-S		2.2.1	Beijing	group_101	S	S	S	S
IT1976	SRR29126248	2020	Lombardy	1	1	Not available	2423290	2395600	98.86	74	17269	Pan-S		3	Delhi-CAS	ungrouped	S	S	S	R
IT1977	SRR29126517	2019	Lombardy	1	0	Not available	1525258	1507335	98.82	47	31336	Pan-S		4.1.2.1	Haarlem	group_104	S	S	S	S
IT1978	SRR29126239	2020	Lombardy	0	0	Not available	2006137	1979584	98.68	60	38838	Pan-S		2.2.1	Beijing	ungrouped	S	S
IT1979	SRR31008622	2019	Lombardy	1	1	Not available	2883214	2827334	98.06	80	108276	Other	pncA:His57Asp	M. bovis	M. bovis	group_48	R	S	S	R
IT1980	SRR29126503	2019	Lombardy	1	0	Not available	2573543	2540494	98.72	78	20072	Pan-S		4.1.2.1	Haarlem	group_63	S	S	S	S
IT1981	SRR29126634	2020	Lombardy	1	0	Not available	1708711	1688520	98.82	53	19747	Pan-S		4	Euro-American	ungrouped	S	S	S	S
IT1982	SRR29126286	2019	Lombardy	0	0	Not available	3474097	3415071	98.3	101	27105	Pan-S		3	Delhi-CAS	ungrouped	S	S	S	S
IT1983	SRR29126633	2019	Lombardy	0	1	Not available	3391184	3344190	98.61	98	25151	Pan-S		4.4.1.1	S-type	ungrouped	S	S	S	S
IT1984	SRR29126647	2019	Lombardy	1	0	Not available	2441166	2409395	98.7	73	47970	Pan-S		4.3.4	LAM	ungrouped	S	S	S
IT1985	SRR29126748	2018	Lombardy	1	1	Not available	3586588	3533336	98.52	102	32107	Pan-S		4.3.1	LAM	ungrouped	S	S	S	S
IT1986	SRR31008934	2019	Lombardy	0	0	Not available	2707667	2673737	98.75	80	23055	Pan-S		4.3.3	LAM	ungrouped	S	S	S	S
IT1987	SRR29126649	2019	Lombardy	0	1	Not available	3211207	3166556	98.61	93	17440	Pan-S		4.8	mainly T	ungrouped	S	S
IT1988	SRR29127003	2019	Lombardy	0	1	Not available	2397054	2368443	98.81	74	36349	Pan-S		4.3.3	LAM	ungrouped	S	S	S	S
IT1990	SRR29127012	2019	Lombardy	1	0	Not available	4299635	4219951	98.15	123	13353	Pan-S		1.2.1	EAI Manila	group_159	S	S	S	S
IT1991	SRR29126645	2020	Lombardy	0	0	Not available	3492126	3437495	98.44	102	38288	Mono-FQs	gyrA: Ala90Val	2.2.1	Beijing	ungrouped	S	S
IT1992	SRR29126993	2019	Lombardy	0	0	Not available	3457750	3403323	98.43	100	23222	Pan-S		4.1.2.1	Haarlem	group_82	S	S	S
IT1993	SRR29126640	2019	Lombardy	0	0	Not available	3008305	2967758	98.65	90	22708	Pan-S		4.8	mainly T	ungrouped	S	S	S	S
IT1994	SRR29126238	2020	Lombardy	1	1	Not available	2553664	2520964	98.72	76	29550	Pan-S		4.3.1	LAM	ungrouped	S	S
IT1995	SRR29126631	2020	Lombardy	1	1	Not available	1796189	1774474	98.79	56	27022	Pan-S		4.1.1.3	X-type	ungrouped	S	S	S	S
IT2000	SRR29126283	2018	Lombardy	1	0	Not available	4808248	4723380	98.23	135	15759	Pan-S		4.1.1.3	X-type	ungrouped	S	S	S	S
IT2002	SRR29126852	2018	Lombardy	1	0	Not available	4457262	4388435	98.46	128	25716	Other	fabG1:Leu203Leu	4.4.1.1	S-type	ungrouped	R	S	S	R
IT2003	SRR29126880	2018	Lombardy	0	0	Not available	5155659	5073693	98.41	145	29184	Pan-S		4.4.1.1	S-type	group_105	S	S	S	S
IT2006	SRR29126263	2019	Lombardy	1	1	Not available	3599011	3551390	98.68	108	34836	MDR	katG: Ser315Thr, rpoB:Ser450Leu , rrs:1472362_C>T_SNP	2.2.1	Beijing	ungrouped	R	R	S	S
IT2008	SRR29127015	2019	Lombardy	1	0	Not available	5714268	5603373	98.06	160	22924	Pan-S		1.2.1	EAI Manila	ungrouped	S	S	S	S
IT2010	SRR29126246	2020	Lombardy	1	0	Not available	5547089	5458212	98.4	158	20419	Pan-S		4.1.2.1	Haarlem	group_142	S	S	S	S
IT2011	SRR29124290	2020	Lombardy	1	Not available	Not available	2067243	2042565	98.81	61	35310	Mono-INH	katG:Ser315Thr	4.3.3	LAM	ungrouped	R	S
IT2013	SRR29124299	2020	Lombardy	1	Not available	Not available	7668905	7570542	98.72	234	31850	Mono-FQs	gyrA: Asp94Gly	4.4.1.1	S-type	group_202	S	S
IT2022	SRR29126266	2019	Lombardy	1	0	Not available	2533981	2491199	98.31	75	58080	Pan-S		6	West-Africa 2	ungrouped	S	S	S	S
IT2023	SRR29126506	2019	Lombardy	0	0	Not available	1851148	1829452	98.83	56	51382	Pan-S		4.6.2.2	Cameroon	group_221	S	S	S	S
IT2024	SRR29126508	2019	Lombardy	1	0	Not available	3127566	3089408	98.78	97	33034	Pan-S		4.1.2.1	Haarlem	group_44	S	S	S	S
IT2025	SRR29126788	2019	Lombardy	1	0	Not available	1952958	1918653	98.24	59	34867	Pan-S		4.1.2.1	Haarlem	group_44	S	S	S	S
IT2026	SRR29127026	2019	Lombardy	1	1	Not available	1757066	1732550	98.6	53	33927	Pan-S		4.1.2.1	Haarlem	ungrouped	S	S	S	S
IT2031	SRR29126299	2019	Lombardy	1	0	Not available	2637685	2602701	98.67	79	22496	Pan-S		3	Delhi-CAS	ungrouped	S	S	S	S
IT2033	SRR29126667	2019	Lombardy	1	0	Not available	2474138	2429266	98.19	74	20714	Pan-S		1.2.1	EAI Manila	ungrouped	S	S	S	S
IT2034	SRR29126275	2019	Lombardy	1	0	Not available	2056682	2017053	98.07	61	25359	Pan-S		4.1.2.1	Haarlem	group_60	S	S	S	S
IT2037	SRR29126650	2019	Lombardy	0	1	Not available	2865938	2823970	98.54	88	56814	Pan-S		4.3.4.2	LAM	ungrouped	S	S	S	S
IT2038	SRR29126302	2019	Lombardy	0	0	Not available	3519660	3464328	98.43	103	44733	Pan-S		4.3.4.1	LAM	ungrouped	S	S	S	S
IT2039	SRR29126353	2018	Lombardy	1	1	Not available	1808328	1781964	98.54	55	36464	Pan-S		1.1.2	EAI	ungrouped	S	S	S	S
IT2041	SRR29126505	2019	Lombardy	1	0	Not available	1794228	1774692	98.91	55	16143	Pan-S		4.8	mainly T	ungrouped	S	S	S	S
IT2042	SRR29126276	2019	Lombardy	0	0	Not available	2355211	2323854	98.67	71	25352	Pan-S		4.1.2.1	Haarlem	group_60	S	S	S	S
IT2043	SRR29126379	2018	Lombardy	0	0	Not available	3585633	3542518	98.8	110	18317	Pan-S		4.8	mainly T	ungrouped	S	S	S	S
IT2045	SRR29126277	2019	Lombardy	1	0	Not available	2860776	2819715	98.56	85	22419	Pan-S		4.1.2.1	Haarlem	group_60	S	S	S	S
IT2048	SRR29126285	2019	Lombardy	1	1	Not available	2378268	2340356	98.41	72	28891	Pan-S		4.3.3	LAM	group_237	S	S	S	S
IT2049	SRR29126509	2019	Lombardy	1	1	Not available	2436326	2405980	98.75	73	47636	Pan-S		4.6.2.2	Cameroon	ungrouped	S	S	S	S
IT2050	SRR29126670	2019	Lombardy	1	0	Not available	2311160	2272041	98.31	72	62021	Mono-INH	fabG1_ups:C-15T- 1673425	6	West-Africa 2	ungrouped	R	S
IT2055	SRR29126652	2019	Lombardy	1	1	Not available	2990644	2950231	98.65	90	28569	Pan-S		4.1.2.1	Haarlem	ungrouped	S	S	S	S
IT2056	SRR29126504	2019	Lombardy	Not available	1	Not available	3025038	2982650	98.6	90	22361	Pan-S		4.1.2.1	Haarlem	group_30	S	S
IT2059	SRR31008923	2019	Lombardy	0	0	Not available	2083201	2054244	98.61	61	21107	Pan-S		4.8	mainly T	group_137	S	S	S	R
IT2060	SRR29126284	2019	Lombardy	1	0	Not available	6062916	5923654	97.7	165	25227	Pan-S		4.3.3	LAM	ungrouped	S	S	S	S
IT2061	SRR31008912	2019	Lombardy	1	0	Not available	5201863	5107037	98.18	153	48439	Mono-INH	fabG1_ups:C-15T- 1673425	4.6.2.2	Cameroon	group_234	R	S	S	R
IT2062	SRR29126282	2019	Lombardy	1	0	Not available	3945950	3884397	98.44	116	34693	Pan-S		2.2.1	Beijing	group_40	S	S	S	S
IT2063	SRR29126281	2019	Lombardy	0	0	Not available	3248790	3171583	97.62	92	23136	Pan-S		4.1.2.1	Haarlem	group_83	S	S	S	S
IT2064	SRR29126280	2019	Lombardy	1	0	Not available	3405028	2763444	81.16	78	51213	Pan-S		6	West-Africa 2	ungrouped	S	S	S	S
IT2065	SRR29126279	2019	Lombardy	1	0	Not available	3614166	3451297	95.49	103	34153	Pan-S		2.2.1	Beijing	group_41	S	S	S	S
IT2066	SRR29126685	2019	Lombardy	1	0	Not available	3877595	3800334	98.01	112	18679	Pan-S		4.1.2.1	Haarlem	ungrouped	S	S	S	S
IT2067	SRR29126683	2019	Lombardy	1	0	Not available	4944522	4839528	97.88	138	30496	Other	embB:Met306Ile	1.1.3	EAI	ungrouped	S	S	S	S
IT2068	SRR29126682	2019	Lombardy	0	0	Not available	4702180	4583869	97.48	132	35540	Pan-S		2.2.1.1	Beijing	ungrouped	S	S	S	S
IT2069	SRR29126681	2019	Lombardy	0	0	Not available	3180241	3121240	98.14	93	33759	Pan-S		4.3.3	LAM	ungrouped	S	S	S	S
IT2070	SRR29126680	2019	Lombardy	1	1	Not available	3191618	3127968	98.01	92	10532	Pan-S		4.8	mainly T	ungrouped	S	S	S	S
IT2071	SRR29126679	2019	Lombardy	0	1	Not available	3154408	3104521	98.42	91	18953	Pan-S		4.1.2.1	Haarlem	ungrouped	S	S	S	S
IT2072	SRR29126677	2019	Lombardy	0	1	Not available	2801555	2739489	97.78	83	17463	Pan-S		4.8	mainly T	group_206	S	S	S	S
IT2073	SRR29126676	2019	Lombardy	1	0	Not available	2813251	2777957	98.75	82	22629	Pan-S		4.8	mainly T	group_118	S	S	S	S
IT2074	SRR29126675	2019	Lombardy	0	0	Not available	5808518	5689519	97.95	161	19740	Pan-S		4.1.2.1	Haarlem	group_87	S	S	S	S
IT2075	SRR29126674	2019	Lombardy	1	0	Not available	5894153	5794539	98.31	168	17854	Other	rpsL:Lys43Arg	4.1.2.1	Haarlem	ungrouped	S	S	S	S
IT2076	SRR29126672	2019	Lombardy	0	1	Not available	1918461	1897234	98.89	59	16893	Pan-S		4.9	H37Rv-like	ungrouped	S	S	S	S
IT2077	SRR29126671	2019	Lombardy	1	0	Not available	3372034	3321702	98.51	96	13535	Pan-S		4.3.1	LAM	group_191	S	S	S	S
IT2078	SRR29126669	2019	Lombardy	0	0	Not available	4636155	4542038	97.97	128	32693	Pan-S		4.1.2.1	Haarlem	group_5	S	S	S	S
IT2079	SRR29126668	2019	Lombardy	0	0	Not available	2710361	2637543	97.31	77	22070	Pan-S		4.2.2	Euro-American	group_131	S	S	S	S
IT2080	SRR29126666	2019	Lombardy	0	0	Not available	3974486	3899874	98.12	113	43835	Poly-resistant	embA:Gly5Ser, embB:Leu402Val, katG:Ser315Thr, rpsL:Lys43Arg	4.3.4.1	LAM	group_134	R	S	S	S
IT2081	SRR29126665	2019	Lombardy	1	0	Not available	4932494	4783687	96.98	127	29126	Pan-S		3.1.2	Delhi-CAS	group_21	S	S	S	S
IT2082	SRR29126664	2019	Lombardy	0	0	Not available	7176337	7030951	97.97	198	23520	Mono-INH	katG:Ser315Thr	4.3.3	LAM	group_251	R	S	S	S
IT2083	SRR29126663	2019	Lombardy	1	0	Not available	3285463	3224306	98.14	95	13512	Pan-S		1.2.1	EAI Manila	ungrouped	S	S	S	R
IT2084	SRR29126661	2019	Lombardy	0	0	Not available	4264330	4181918	98.07	118	36315	Mono-INH	fabG1_ups:C-15T- 1673425	2.2.1	Beijing	ungrouped	R	S	S	S
IT2085	SRR29126660	2019	Lombardy	1	1	Not available	3638014	3516567	96.66	104	20840	Pan-S		4.4	Euro-American	ungrouped	S	S	S	S
IT2086	SRR29126659	2019	Lombardy	1	0	Not available	2990119	2924696	97.81	83	20893	Pan-S		4.1.2.1	Haarlem	ungrouped	S	S	S	S
IT2087	SRR29126658	2019	Lombardy	0	1	Not available	2911896	2870515	98.58	87	16132	Pan-S		4.8	mainly T	ungrouped	S	S	S	S
IT2088	SRR29126657	2019	Lombardy	1	1	Not available	2869315	2831755	98.69	89	19078	Pan-S		3	Delhi-CAS	ungrouped	S	S	S	S
IT2089	SRR29126656	2019	Lombardy	1	0	Not available	1991561	1962464	98.54	60	31253	Pan-S		1.2.1	EAI Manila	ungrouped	S	S	S	R
IT2090	SRR29126655	2019	Lombardy	0	0	Not available	3651531	3545659	97.1	100	20226	Pan-S		1.1.2	EAI	ungrouped	S	S	S	R
IT2091	SRR29126654	2019	Lombardy	1	0	Not available	3928722	3723052	94.76	103	26657	Pan-S		4.1.2.1	Haarlem	ungrouped	S	S	S	S
IT2093	SRR29127017	2019	Lombardy	1	0	Not available	3308725	2974274	89.89	89	34503	Pan-S		2.2.1	Beijing	ungrouped	S	S	S	S
IT2094	SRR29126653	2019	Lombardy	0	0	Not available	4459706	4360012	97.76	119	20972	Pan-S		4.5	Euro-American	group_148	S	S	S	S
IT2095	SRR29127030	2019	Lombardy	1	0	Not available	3813509	3740193	98.08	105	12769	Pan-S		4.1.2.1	Haarlem	group_26	S	S	S	S
IT2096	SRR29127029	2019	Lombardy	1	1	Not available	3201236	3150611	98.42	94	33307	Pan-S		4.3.3	LAM	ungrouped	S	S	S	S
IT2097	SRR29127028	2019	Lombardy	0	0	Not available	1637662	1619841	98.91	50	35056	Pan-S		4.3.3	LAM	ungrouped	S	S	S	S
IT2098	SRR29127027	2019	Lombardy	1	1	Not available	1752056	1728020	98.63	52	28236	Pan-S		4.1.2.1	Haarlem	ungrouped	S	S	S	S
IT2099	SRR29127025	2019	Lombardy	1	1	Not available	3653158	3569988	97.72	89	34601	Pan-S		1.2.1	EAI Manila	ungrouped	S	S	S	S
IT2100	SRR29127024	2019	Lombardy	1	1	Not available	2581209	2516396	97.49	72	17886	Pan-S		4.2.1	Ural	ungrouped	S	S	S	S
IT2101	SRR29127023	2019	Lombardy	0	0	Not available	2730563	2691834	98.58	81	45846	Poly-resistant	embA:Gly5Ser, embB:Leu402Val, katG:Ser315Thr, rpsL:Lys43Arg	4.3.4.1	LAM	group_134	R	S	S	S
IT2102	SRR29127008	2019	Lombardy	1	0	Not available	2555101	2348781	91.93	70	19934	Pan-S		3	Delhi-CAS	group_91	S	S	S	S
IT2103	SRR29127022	2019	Lombardy	1	0	Not available	2901265	2853856	98.37	86	25294	Pan-S		4.1.2.1	Haarlem	group_27	S	S	S	S
IT2104	SRR29127019	2019	Lombardy	0	0	Not available	4122238	4032739	97.83	109	25340	Pan-S		4.8	mainly T	ungrouped	S	S	S	S
IT2105	SRR29127018	2019	Lombardy	0	0	Not available	5098262	1935813	37.97	52	22898	Pan-S		4.8	mainly T	group_222	S	S	S	S
IT2106	SRR31008829	2019	Lombardy	0	1	Not available	1826380	1799758	98.54	55	120582	Other	pncA:His57Asp	M. bovis	M. bovis	group_23	S	S	S	R
IT2107	SRR29127016	2019	Lombardy	1	1	Not available	2902646	2854034	98.33	85	29724	Pan-S		1.1.2	EAI	ungrouped	S	S	S	R
IT2109	SRR29127014	2019	Lombardy	0	0	Not available	3690571	3611577	97.86	98	22031	Pan-S		4.3.3	LAM	ungrouped	S	S	S	S
IT2110	SRR29127013	2019	Lombardy	1	1	Not available	3097692	3030288	97.82	81	23997	Mono-INH	katG:Ser315Thr	4.1.2.1	Haarlem	ungrouped	R	S	S	S
IT2111	SRR29127011	2019	Lombardy	1	0	Not available	3471570	3422015	98.57	100	25421	Pan-S		4.3	LAM	group_151	S	S	S	S
IT2112	SRR29127010	2019	Lombardy	0	0	Not available	2438241	2408753	98.79	75	34405	Pan-S		4.4.1.1	S-type	ungrouped	S	S	S	S
IT2113	SRR29127007	2019	Lombardy	1	1	Not available	2223657	2192913	98.62	67	21016	Pan-S		4.1.2	Euro-American	group_28	S	S	S	S
IT2114	SRR29127006	2019	Lombardy	0	0	Not available	2294413	2248849	98.01	66	19133	Pan-S		4.8	mainly T	group_13	S	S	S	S
IT2115	SRR29127002	2019	Lombardy	0	1	Not available	3158161	3090840	97.87	85	15504	Pan-S		4.8	mainly T	ungrouped	S	S	S	R
IT2116	SRR29127001	2019	Lombardy	1	0	Not available	3148846	3105884	98.64	92	32940	Pan-S		4.8	mainly T	group_93	S	S	S	S
IT2118	SRR29126999	2019	Lombardy	1	1	Not available	4512096	4398792	97.49	119	12062	Pan-S		1.2.1	EAI Manila	ungrouped	S	S	S	S
IT2119	SRR29126997	2019	Lombardy	0	0	Not available	2808492	2740325	97.57	77	52398	Pan-S		4.3.4	LAM	ungrouped	S	S	S	S
IT2120	SRR29126502	2019	Lombardy	1	0	Not available	2427756	2391865	98.52	73	18125	Pan-S		3	Delhi-CAS	ungrouped	S	S	S	S
IT2121	SRR29126501	2019	Lombardy	1	0	Not available	2153540	2109872	97.97	65	37582	Pan-S		2.2.1	Beijing	group_77	S	S	S	S
IT2122	SRR29126500	2019	Lombardy	0	0	Not available	4894306	4804690	98.17	136	16730	Pan-S		4.4.1.1	S-type	group_256	S	S	S	S
IT2123	SRR29126499	2019	Lombardy	1	1	Not available	2854951	2806989	98.32	83	16796	Mono-INH	katG: Ser315Thr	1.2.1	EAI Manila	ungrouped	R	S	S	S
IT2124	SRR29126498	2019	Lombardy	0	1	Not available	2827573	2789807	98.66	85	22940	Pan-S		4.3.3	LAM	ungrouped	S	S	S	S
IT2125	SRR29126497	2019	Lombardy	1	0	Not available	3469723	3416312	98.46	102	38006	Pan-S		2.2.1.2	Beijing	ungrouped	S	S	S	S
IT2126	SRR29126495	2019	Lombardy	0	1	Not available	3115378	3002202	96.37	88	28236	Pan-S		4.3.1	LAM	group_248	S	S	S	S
IT2128	SRR29126494	2019	Lombardy	0	1	Not available	1701751	1677953	98.6	51	21631	Pan-S		3	Delhi-CAS	ungrouped	S	S	S	S
IT2129	SRR29126493	2019	Lombardy	1	0	Not available	2327236	2251273	96.74	70	55554	Pan-S		6	West-Africa 2	ungrouped	S	S	S	S
IT2130	SRR29126490	2019	Lombardy	1	0	Not available	3254386	3210561	98.65	103	23670	Pan-S		1.2.2	EAI	ungrouped	S	S	S	S
IT2131	SRR29126273	2019	Lombardy	1	0	Not available	4295701	4242827	98.77	130	23868	Poly-resistant	fabG1_ups:C-15T- 1673425, pncA:His51Arg	4.3.3	LAM	group_176	R	S	S	R
IT2132	SRR31008818	2019	Lombardy	0	1	Not available	4870135	4783218	98.22	142	114067	Other	pncA:His57Asp	M. bovis	M. bovis	group_23	S	S	S	R
IT2133	SRR29126272	2019	Lombardy	1	0	Not available	4248297	4202058	98.91	132	18795	Pan-S		4.4.1.1	S-type	group_256	S	S	S	S
IT2134	SRR29126271	2019	Lombardy	0	0	Not available	4547120	4483846	98.61	135	32869	Pan-S		4.1.2.1	Haarlem	ungrouped	S	S	S	S
IT2135	SRR29126270	2019	Lombardy	1	0	Not available	4866578	4801891	98.67	146	29057	Pan-S		4.1.2.1	Haarlem	ungrouped	S	S	S	S
IT2136	SRR29126268	2019	Lombardy	1	0	Not available	3168002	3129814	98.79	99	47833	Other	rpsL:Lys43Arg	4.6.2.2	Cameroon	group_188	S	S	S	S
IT2137	SRR29126267	2019	Lombardy	0	1	Not available	4732302	4672760	98.74	145	19877	Mono-FQs	gyrA: Asp94Ala	4.1.2.1	Haarlem	ungrouped	S	S	S	S
IT2139	SRR31008807	2019	Lombardy	0	1	Not available	3854949	3790307	98.32	113	114620	Other	pncA:His57Asp	M. bovis	M. bovis	group_23	S	S	S	R
IT2140	SRR29126265	2019	Lombardy	0	0	Not available	3641872	3605298	99	113	19112	Pan-S		4.8	mainly T	ungrouped	S	S	S	S
IT2142	SRR29126475	2019	Lombardy	1	0	Not available	2947568	2916912	98.96	92	20467	Other	rpsL:Lys43Arg	4.8	mainly T	ungrouped	S	S	S	S
IT2145	SRR29126786	2019	Lombardy	1	0	Not available	4482843	4421804	98.64	137	30708	Pan-S		4.1.2.1	Haarlem	group_224	S	S	S	S
IT2146	SRR29126784	2019	Lombardy	1	0	Not available	4256706	4212858	98.97	133	8372	Pan-S		4.7	mainly T	ungrouped	S	S	S	S
IT2150	SRR29126472	2019	Lombardy	1	0	Not available	3545140	3506564	98.91	113	23407	Pan-S		4.1.2.1	Haarlem	ungrouped	S	S	S	S
IT2152	SRR29126473	2019	Lombardy	1	0	Not available	3430079	3391082	98.86	108	28625	Mono-INH	katG:Ser315Thr	4.3.1	LAM	ungrouped	R	S	S	S
IT2154	SRR29126474	2019	Lombardy	0	0	Not available	3971380	3928217	98.91	121	8108	Pan-S		4.8	mainly T	ungrouped	S	S	S	S
IT2160	SRR29126226	2020	Lombardy	1	1	Not available	3069717	3026537	98.59	97	18567	Pan-S		1.2.1	EAI Manila	ungrouped	S	S	S	S
IT2161	SRR29126223	2020	Lombardy	1	1	Not available	3124706	3087028	98.79	98	27061	Mono-FQs	gyrA: Asp94Gly	3	Delhi-CAS	ungrouped	S	S	S	S
IT2162	SRR29126219	2020	Lombardy	1	1	Not available	2961488	2934328	99.08	94	30701	Pan-S		4.4.1.1	S-type	ungrouped	S	S	S	S
IT2163	SRR29126212	2020	Lombardy	1	0	Not available	2473458	2447243	98.94	78	30195	Pan-S		4.1.2.1	Haarlem	ungrouped	S	S	S	S
IT2164	SRR29126217	2020	Lombardy	1	0	Not available	3851518	3797465	98.6	117	19109	Pan-S		3	Delhi-CAS	group_33	S	S	S	S
IT2165	SRR29126235	2020	Lombardy	1	0	Not available	2511367	2476063	98.59	77	32349	Pan-S		4.8	mainly T	group_157	S	S	S	S
IT2166	SRR29124297	2020	Lombardy	1	0	Not available	3064558	3024108	98.68	97	17127	Pan-S		1.2.1	EAI Manila	ungrouped	S	S	S	S
IT2167	SRR29126520	2020	Lombardy	1	0	Not available	3171620	2842707	89.63	90	39666	Other	rpsL:Lys88Arg	2.2.1.1	Beijing	ungrouped	S	S	S	S
IT2168	SRR29126237	2020	Lombardy	1	1	Not available	3844747	3760627	97.81	119	22973	Pan-S		4.1.2.1	Haarlem	ungrouped	S	S	S	S
IT2169	SRR29126461	2020	Lombardy	1	0	Not available	4257269	4204217	98.75	131	25520	Pan-S		4.1.2.1	Haarlem	ungrouped	S	S	S	S
IT2171	SRR29126216	2020	Lombardy	1	0	Not available	4773551	3227703	67.62	101	29891	Pan-S		4.8	mainly T	group_157	S	S	S	S
IT2172	SRR29124330	2020	Lombardy	0	0	Not available	3482979	3445846	98.93	111	21135	Pan-S		3	Delhi-CAS	ungrouped	S	S	S	S
IT2173	SRR29126464	2020	Lombardy	1	0	Not available	3419440	3377656	98.78	109	23897	Pan-S		1.2.1	EAI Manila	ungrouped	S	S	S	S
IT2174	SRR29126228	2020	Lombardy	1	1	Not available	2652266	2606919	98.29	82	31819	Pan-S		1.1.1	EAI	ungrouped	S	S	S	R
IT2175	SRR29126220	2020	Lombardy	1	0	Not available	3470578	3414526	98.38	109	19456	Pan-S		3	Delhi-CAS	group_33	S	S	S	S
IT2176	SRR29126459	2020	Lombardy	1	0	Not available	4512346	4463161	98.91	139	47270	Pan-S		4.6.2.2	Cameroon	ungrouped	S	S	S	S
IT2177	SRR29126465	2020	Lombardy	1	1	Not available	3801279	3754087	98.76	118	17128	Pan-S		4.8	mainly T	group_264	S	S	S	S
IT2178	SRR29126229	2020	Lombardy	0	0	Not available	5969772	5874497	98.4	179	56088	Pan-S		4.3.4.2	LAM	ungrouped	S	S	S	S
IT2179	SRR29126462	2020	Lombardy	0	1	Not available	2619022	2598027	99.2	84	20411	Other	rpsL:Lys43Arg	4.9	H37Rv-like	ungrouped	S	S	S	S
IT2180	SRR29126205	2020	Lombardy	1	0	Not available	3677597	3566741	96.99	115	43102	Pan-S		4.6.2.2	Cameroon	ungrouped	S	S	S	S
IT2181	SRR29126469	2020	Lombardy	1	0	Not available	3884071	3837857	98.81	121	25367	Pan-S		4.3.3	LAM	ungrouped	S	S	S	S
IT2182	SRR29126234	2020	Lombardy	0	0	Not available	6405799	6305957	98.44	185	19821	Pan-S		4.1.2.1	Haarlem	group_167	S	S	S	S
IT2183	SRR29126518	2020	Lombardy	1	0	Not available	3338890	3289594	98.52	101	32915	Other	rpsL:Lys43Arg	1.1.3	EAI	ungrouped	S	S	S	S
IT2184	SRR29126225	2020	Lombardy	1	1	Not available	4253267	4193239	98.59	123	17586	Pan-S		3	Delhi-CAS	ungrouped	S	S	S	S
IT2185	SRR29126454	2020	Lombardy	1	0	Not available	3121115	3084260	98.82	95	15957	Other	rrs:1472337_C>T_SNP	4.3.2	LAM	ungrouped	S	S	S	S
IT2186	SRR29126468	2020	Lombardy	1	1	Not available	5319372	5243300	98.57	155	11652	Other	rrs:1472337_C>T_SNP	4.3.2	LAM	ungrouped	S	S	S	S
IT2187	SRR29126456	2020	Lombardy	1	0	Not available	3672954	3622154	98.62	108	21580	Pan-S		4.1.2.1	Haarlem	ungrouped	S	S	S	S
IT2188	SRR29126203	2020	Lombardy	1	0	Not available	3223154	3071657	95.3	94	29091	Pan-S		4.8	mainly T	group_18	S	S	S	S
IT2189	SRR29126213	2020	Lombardy	1	0	Not available	2744764	2700012	98.37	81	25580	Pan-S		4.1.2.1	Haarlem	ungrouped	S	S	S	S
IT2190	SRR29126211	2020	Lombardy	1	0	Not available	4296795	4232400	98.5	125	25558	Pan-S		4.8	mainly T	ungrouped	S	S	S	S
IT2191	SRR29126458	2020	Lombardy	0	0	Not available	4713599	4652165	98.7	137	32980	Pan-S		2.2.1	Beijing	ungrouped	S	S	S	S
IT2192	SRR29126521	2020	Lombardy	1	0	Not available	3631630	3583818	98.68	108	24662	Pan-S		1.2.1	EAI Manila	ungrouped	S	S	S	S
IT2193	SRR29126209	2020	Lombardy	0	0	Not available	3922500	3878328	98.87	118	30295	Pan-S		4.4.1.1	S-type	ungrouped	S	S	S	S
IT2194	SRR29126230	2020	Lombardy	1	1	Not available	3244690	3198813	98.59	98	22323	Pan-S		1.2.2	EAI	ungrouped	S	S	S	S
IT2195	SRR29126467	2020	Lombardy	1	0	Not available	6792232	6649909	97.9	181	32633	Pan-S		2.2.1	Beijing	ungrouped	S	S	S	S
IT2197	SRR29124308	2020	Lombardy	1	0	Not available	4194412	4130304	98.47	124	13078	Mono-INH	fabG1_ups:T-8C- 1673432	1.2.1	EAI Manila	ungrouped	R	S	S	S
IT2198	SRR29126231	2020	Lombardy	0	0	Not available	5717696	5624408	98.37	163	16617	Pan-S		4.1.2.1	Haarlem	ungrouped	S	S	S	S
IT2199	SRR29126224	2020	Lombardy	1	0	Not available	4684969	4611667	98.44	135	13444	Pan-S		1.2.1	EAI Manila	ungrouped	S	S	S	S
IT2200	SRR29126227	2020	Lombardy	1	1	Not available	5195839	5105002	98.25	148	23379	Pan-S		3	Delhi-CAS	ungrouped	S	S	S	S
IT2202	SRR29126524	2020	Lombardy	1	0	Not available	4462654	4393026	98.44	127	25510	Pan-S		4.1.2.1	Haarlem	group_210	S	S	S	S
IT2203	SRR29126455	2020	Lombardy	0	0	Not available	2970831	2797890	94.18	85	14709	Pan-S		4.8	mainly T	group_72	S	S	S	S
IT2204	SRR29126214	2020	Lombardy	1	0	Not available	4852915	4787336	98.65	143	53410	Pan-S		4.3.4.2	LAM	group_154	S	S	S	S
IT2205	SRR29126463	2020	Lombardy	1	0	Not available	3689528	3647198	98.85	108	11859	Pan-S		4.8	mainly T	group_14	S	S	S	S
IT2206	SRR29126466	2020	Lombardy	0	0	Not available	5154820	5065929	98.28	147	33605	Pan-S		4.1.2.1	Haarlem	group_253	S	S	S	S
IT2207	SRR29126457	2020	Lombardy	0	0	Not available	2717380	2679871	98.62	82	38818	Pan-S		4.1.2.1	Haarlem	group_253	S	S	S	S
IT2208	SRR29126470	2020	Lombardy	1	1	Not available	3104777	3062101	98.63	93	30120	Pan-S		4.8	mainly T	group_157	S	S	S	S
IT2209	SRR29126215	2020	Lombardy	0	0	Not available	3244019	3162259	97.48	95	14758	Pan-S		4.8	mainly T	group_99	S	S	S	S
IT2210	SRR29126204	2020	Lombardy	0	0	Not available	2222104	2192414	98.66	65	23958	Pan-S		4.4.1.1	S-type	ungrouped	S	S	S	S
IT2211	SRR29124319	2020	Lombardy	1	1	Not available	3944019	3883925	98.48	116	31172	Pan-S		4.2.1	Ural	ungrouped	S	S	S	S
IT2212	SRR29126523	2020	Lombardy	1	0	Not available	2879393	2846320	98.85	87	22281	Pan-S		4.8	mainly T	ungrouped	S	S	S	S
IT2214	SRR29126519	2020	Lombardy	0	0	Not available	4059468	4000650	98.55	113	19212	Pan-S		4.4.1.1	S-type	group_256	S	S	S	S
IT2215	SRR29126207	2020	Lombardy	1	0	Not available	1825731	1799270	98.55	55	21641	Pan-S		1.2.1	EAI Manila	ungrouped	S	S	S	S
IT2216	SRR29126218	2020	Lombardy	1	1	Not available	3205599	3158324	98.53	96	30757	Pan-S		1.1.3	EAI	ungrouped	S	S	S	R
IT2217	SRR29126232	2020	Lombardy	1	0	Not available	2661268	2630595	98.85	79	25865	Pan-S		4.4.1.1	S-type	ungrouped	S	S	S	S
IT2218	SRR29124331	2020	Lombardy	1	0	Not available	1877732	1852518	98.66	56	35151	Pan-S		4.1.2.1	Haarlem	ungrouped	S	S	S	S
IT2219	SRR29124286	2020	Lombardy	1	0	Not available	3029952	2986502	98.57	91	21311	Pan-S		4.2.2	Euro-American	ungrouped	S	S	S	S
IT2220	SRR29124275	2020	Lombardy	1	1	Not available	3310956	3267363	98.68	100	41515	Pan-S		2.2.1.1	Beijing	ungrouped	S	S	S	S
IT2221	SRR29124264	2020	Lombardy	0	0	Not available	2744430	2705242	98.57	81	39209	Pan-S		4.1.2.1	Haarlem	group_2	S	S	S	S
IT2222	SRR29124257	2020	Lombardy	1	0	Not available	2821927	2786911	98.76	85	25957	MDR	embB:Gly406Cys, katG:Ser315Thr, rpoB: Ser450Leu	4.1.2.1	Haarlem	ungrouped	R	R	R	R
IT2223	SRR29124256	2020	Lombardy	1	1	Not available	2869534	2826329	98.49	86	26784	Mono-INH	katG:Ser315Thr	1.2.2	EAI	ungrouped	R	S	S	R
IT2224	SRR29124329	2020	Lombardy	1	0	Not available	2550144	2508674	98.37	78	23962	Pan-S		1.2.1	EAI Manila	ungrouped	S	S	S	R
IT2225	SRR31008796	2020	Lombardy	0	1	Not available	3088240	3043328	98.55	93	117833	Other	pncA:His57Asp	M. bovis	M. bovis	group_23	S	S	S	R
IT2226	SRR29124326	2020	Lombardy	0	0	Not available	3495171	3452645	98.78	105	25334	Pan-S		4.8	mainly T	ungrouped	S	S	S	S
IT2227	SRR29124325	2020	Lombardy	1	0	Not available	3649834	3608031	98.85	109	19353	Pan-S		4.6	Euro-American	ungrouped	S	S	S	S
IT2228	SRR29124323	2020	Lombardy	1	0	Not available	3320895	3268869	98.43	99	30936	Pan-S		1.1.1	EAI	ungrouped	S	S	S	S
IT2229	SRR29124324	2020	Lombardy	0	1	Not available	3291655	3248655	98.69	99	24400	Pan-S		4.1.2.1	Haarlem	group_66	S	S	S	S
IT2230	SRR29124322	2020	Lombardy	1	1	Not available	3150145	3119639	99.03	99	25453	Pan-S		4.8	mainly T	ungrouped	S	S	S	S
IT2231	SRR29124321	2020	Lombardy	0	0	Not available	2825870	2795461	98.92	87	35665	Pan-S		4.8	mainly T	group_93	S	S	S	S
IT2232	SRR29124312	2020	Lombardy	1	1	Not available	3806290	3759461	98.77	115	35166	Pan-S		2.2.1	Beijing	ungrouped	S	S	S	S
IT2233	SRR29124313	2020	Lombardy	1	0	Not available	4737012	4684555	98.89	140	50276	Pan-S		4.6.2.2	Cameroon	group_228	S	S	S	S
IT2234	SRR29124314	2020	Lombardy	1	0	Not available	5340921	5276092	98.79	158	54215	Pan-S		4.3.4.2	LAM	ungrouped	S	S	S	S
IT2235	SRR29124315	2020	Lombardy	1	0	Not available	3427979	3386613	98.79	105	23809	Pan-S		4.1.2.1	Haarlem	ungrouped	S	S	S	S
IT2236	SRR29124316	2020	Lombardy	1	0	Not available	3387929	3347460	98.81	102	16538	Pan-S		3	Delhi-CAS	ungrouped	S	S	S	S
IT2237	SRR29124317	2020	Lombardy	1	1	Not available	3639321	3593747	98.75	108	8396	Pan-S		4.8	mainly T	group_106	S	S	S	S
IT2238	SRR29124318	2020	Lombardy	1	0	Not available	4963517	4907821	98.88	149	12741	Pan-S		4	Euro-American	ungrouped	S	S	S	S
IT2239	SRR29124320	2020	Lombardy	1	1	Not available	5129113	5044290	98.35	150	23258	Pan-S		4.2.2	Euro-American	ungrouped	S	S	S	S
IT2240	SRR29124328	2020	Lombardy	1	0	Not available	4556840	4494243	98.63	134	34558	Pan-S		2.2.1	Beijing	ungrouped	S	S	S	S
IT2241	SRR29124327	2020	Lombardy	0	1	Not available	3799605	3751059	98.72	113	32604	Mono-FQs	gyrA: Asp94Gly	4.4.1.1	S-type	group_202	R	S	S	S
IT2242	SRR29124311	2020	Lombardy	1	1	Not available	3170411	3127438	98.64	95	36753	Pan-S		2.2.1	Beijing	group_169	S	S	S	S
IT2244	SRR29126236	2020	Lombardy	1	0	Not available	3915796	3511872	89.68	107	28875	Pan-S		4.1.2.1	Haarlem	ungrouped	S	S	S	S
IT2247	SRR29124289	2021	Lombardy	1	Not available	Not available	3317835	3274670	98.7	98	34133	MDR	katG: Ser315Thr, rpoB:Leu452Pro, rpsL:Lys43Arg	2.2.1	Beijing	group_17	R	R	R
IT2248	SRR29124300	2021	Lombardy	0	Not available	Not available	3821479	3777550	98.85	117	18715	Pan-S		3.1.2	Delhi-CAS	group_238	S	S
IT2251	SRR29126764	2020	Lombardy	1	0	Not available	3204402	3172364	99	99	19674	Other	rpsL:Lys43Arg	4.8	mainly T	ungrouped	S	S	S	S
IT2252	SRR29126536	2020	Lombardy	1	0	Not available	2272493	2246758	98.87	71	31853	Pan-S		4.1.2.1	Haarlem	group_32	S	S	S	S
IT2253	SRR29126535	2020	Lombardy	1	1	Not available	3281871	3249184	99	102	22397	Pan-S		4.3.1	LAM	group_84	S	S	S	S
IT2254	SRR29126382	2020	Lombardy	1	0	Not available	3053981	3015605	98.74	94	14303	Pan-S		4.5	Euro-American	group_199	S	S	S	S
IT2255	SRR29126165	2020	Lombardy	1	0	Not available	2926033	2884561	98.58	92	25747	Pan-S		1.1.2	EAI	ungrouped	S	S	S	S
IT2256	SRR29126164	2020	Lombardy	1	0	Not available	2212534	2182397	98.64	69	21449	Pan-S		1.2.1	EAI Manila	ungrouped	S	S	S	R
IT2257	SRR29126163	2020	Lombardy	1	0	Not available	1555884	1531134	98.41	44	34033	Pan-S		4.1.2.1	Haarlem	group_253	S	S	S	S
IT2258	SRR29126159	2020	Lombardy	1	0	Not available	1323208	1307891	98.84	39	21437	Pan-S		4.8	mainly T	ungrouped	S	S	S	S
IT2259	SRR29126157	2020	Lombardy	1	0	Not available	1878604	1861221	99.07	58	19753	Other	rrs:1472337_C>T_SNP	4.3.2	LAM	ungrouped	S	S	S	S
IT2260	SRR29126383	2020	Lombardy	1	1	Not available	2587547	2553244	98.67	75	44359	Pan-S		4.8	mainly T	ungrouped	S	S	S	S
IT2261	SRR31008461	2020	Lombardy	1	0	Not available	3723621	3672643	98.63	108	33240	Pan-S		2.2.1	Beijing	group_1	S	S
IT2262	SRR29126384	2020	Lombardy	1	0	Not available	2293038	2265255	98.79	70	23993	Pan-S		4.1.2.1	Haarlem	ungrouped	S	S	S	S
IT2263	SRR29126385	2020	Lombardy	1	0	Not available	2926727	2893784	98.87	91	26923	Pan-S		4.6.2	Euro-American	group_217	S	S	S	S
IT2264	SRR29126388	2020	Lombardy	1	1	Not available	5562414	5453373	98.04	156	31491	Pan-S		2.2.1	Beijing	group_50	S	S	S	S
IT2265	SRR29126609	2020	Lombardy	1	1	Not available	1438583	1414364	98.32	43	13434	Pan-S		4.8	mainly T	ungrouped	S	S	S	S
IT2266	SRR29126394	2020	Lombardy	1	0	Not available	2647536	2605314	98.41	77	27962	Pan-S		1.2.1	EAI Manila	ungrouped	S	S	S	S
IT2267	SRR30861008	2020	Lombardy	1	0	Not available	2233346	2207475	98.84	68	9394	Pan-S		4.1.2.1	Haarlem	ungrouped	S	S	S	S
IT2268	SRR29126607	2020	Lombardy	1	0	Not available	3532170	3482504	98.59	106	35777	Pan-S		4.1.2.1	Haarlem	group_2	S	S	S	S
IT2269	SRR29126156	2020	Lombardy	1	0	Not available	3572749	3532389	98.87	110	21777	Pan-S		4.1.2.1	Haarlem	group_65	S	S	S	S
IT2270	SRR29126765	2020	Lombardy	1	1	Not available	2650185	2617216	98.76	82	16058	Mono-INH	katG:Ser315Thr	4.2.1	Ural	ungrouped	R	S	S	S
IT2271	SRR29126763	2020	Lombardy	0	0	Not available	2875021	2842521	98.87	89	14768	Pan-S		4.8	mainly T	ungrouped	S	S	S	S
IT2272	SRR29126202	2020	Lombardy	1	0	Not available	5233596	5152890	98.46	151	54948	Pan-S		4.3.4.2	LAM	ungrouped	S	S	S	S
IT2273	SRR29126391	2020	Lombardy	1	0	Not available	3533698	3484917	98.62	106	29771	Pan-S		4.5	Euro-American	ungrouped	S	S	S	S
IT2274	SRR29126540	2020	Lombardy	1	1	Not available	2535283	2504709	98.79	77	29163	Pan-S		4.1.2.1	Haarlem	ungrouped	S	S	S	S
IT2275	SRR29126533	2020	Lombardy	1	0	Not available	5245302	5169208	98.55	155	13957	Pan-S		4.6.1	Uganda	ungrouped	S	S	S	S
IT2276	SRR29126612	2020	Lombardy	1	1	Not available	2715002	2687768	99	84	55513	Pan-S		4.3.4.2	LAM	group_154	S	S	R	S
IT2277	SRR29126608	2020	Lombardy	1	0	Not available	3468783	3433643	98.99	108	28714	Pan-S		4.4.1.1	S-type	ungrouped	S	S	S	S
IT2278	SRR29126392	2020	Lombardy	1	0	Not available	2513784	2481862	98.73	77	16529	Pan-S		4.5	Euro-American	ungrouped	S	S	S	S
IT2279	SRR29126389	2020	Lombardy	1	0	Not available	2381302	2354663	98.88	74	35905	Pan-S		2.2.1	Beijing	group_50	S	S	S	S
IT2280	SRR29126162	2020	Lombardy	1	1	Not available	5938234	5864780	98.76	176	13978	Pan-S		3	Delhi-CAS	ungrouped	S	S	S	S
IT2281	SRR29126161	2020	Lombardy	1	0	Not available	6335719	6280210	99.12	196	23578	Pan-S		4.3.3	LAM	ungrouped	S	S	S	S
IT2282	SRR29126768	2020	Lombardy	1	0	Not available	3986958	3940211	98.83	123	23735	Pan-S		4.3	LAM	group_151	S	S	S	S
IT2283	SRR29126767	2020	Lombardy	1	0	Not available	3899135	3843542	98.57	126	17102	Pan-S		4	Euro-American	ungrouped	S	S	S	S
IT2284	SRR29126762	2020	Lombardy	1	1	Not available	1771240	1744091	98.47	56	28271	Pan-S		3	Delhi-CAS	ungrouped	S	S	S	S
IT2285	SRR29126761	2020	Lombardy	1	0	Not available	3710477	3662061	98.7	120	11346	Pan-S		4.8	mainly T	group_14	S	S	S	S
IT2286	SRR29126760	2020	Lombardy	1	0	Not available	1689913	1673044	99	53	32985	Pan-S		4.1.2.1	Haarlem	group_32	S	S	S	S
IT2287	SRR29126759	2020	Lombardy	1	0	Not available	4519349	4461740	98.73	143	23264	Pan-S		4.1.2.1	Haarlem	ungrouped	S	S	S	S
IT2288	SRR29126758	2020	Lombardy	0	0	Not available	3196708	3159624	98.84	99	19201	Pan-S		4.7	mainly T	ungrouped	S	S	S	S
IT2289	SRR29126541	2020	Lombardy	1	0	Not available	2306863	2270693	98.43	71	26959	Pan-S		1.1.2	EAI	ungrouped	S	S	S	S
IT2290	SRR29126538	2020	Lombardy	1	0	Not available	2328400	2302672	98.9	73	26806	Pan-S		4.4.1.1	S-type	ungrouped	S	S	S	S
IT2291	SRR29126537	2020	Lombardy	1	1	Not available	3027550	2992091	98.83	93	24848	Pan-S		4.1.2.1	Haarlem	ungrouped	S	S	S	S
IT2292	SRR29126534	2020	Lombardy	1	0	Not available	5419516	5319611	98.16	154	23927	Pan-S		4.3	LAM	group_151	S	S	S	S
IT2293	SRR31008450	2020	Lombardy	1	1	Not available	3146513	3087696	98.13	91	78490	Other	pncA:His57Asp	M. bovis	M. bovis	ungrouped	S	S	S	R
IT2294	SRR29126386	2020	Lombardy	1	0	Not available	4506076	4431350	98.34	129	15058	Mono-INH	fabG1_ups:G-17T- 1673423	4	Euro-American	group_64	R	S	S	S
IT2297	SRR29126478	2020	Lombardy	1	1	Not available	2533504	2439907	96.31	75	23172	MDR	fabG1_ups:C-15T- 1673425, rpoB:Ser450Leu	4.3.1	LAM	ungrouped	R	R	S	S		S
IT2299	SRR31008439	2020	Lombardy	0	0	Not available	2587580	2489067	96.19	76	85592	Other	pncA:His57Asp	M. bovis	M. bovis	ungrouped	S	S	S	R
IT2303	SRR29126983	2020	Lombardy	1	0	Not available	1800999	1729914	96.05	54	27204	Pan-S		3	Delhi-CAS	ungrouped	S	S	S	S
IT2304	SRR29126964	2020	Lombardy	0	0	Not available	1811516	1780639	98.3	55	22515	Pan-S		4.1.2.1	Haarlem	ungrouped	S	S	S	S
IT2305	SRR29126978	2020	Lombardy	0	0	Not available	1861708	1811754	97.32	57	29745	Pan-S		4.1.2.1	Haarlem	group_210	S	S	S	S
IT2306	SRR29126484	2020	Lombardy	1	0	Not available	2563875	2512413	97.99	75	15148	Pan-S		4.8	mainly T	group_58	S	S	S	S
IT2307	SRR29126486	2020	Lombardy	1	0	Not available	2746222	2681033	97.63	80	34359	Mono-INH	katG:Ser315Asn	2.2.1	Beijing	ungrouped	R	S	S	S	R
IT2308	SRR29126262	2020	Lombardy	0	0	Not available	2312352	1875681	81.12	56	16467	Pan-S		4.8	mainly T	ungrouped	S	S	S	S
IT2309	SRR29126991	2020	Lombardy	1	0	Not available	1851917	1818948	98.22	56	28783	Pan-S		1.2.1	EAI Manila	ungrouped	S	S	S	S
IT2310	SRR29126992	2020	Lombardy	0	0	Not available	3874965	3760495	97.05	115	24176	Pan-S		4.3.3	LAM	ungrouped	S	S	S	S
IT2311	SRR29126960	2020	Lombardy	0	1	Not available	1723729	1691666	98.14	53	44497	Pan-S		2.2.1	Beijing	group_212	S	S	S	S
IT2312	SRR29126975	2020	Lombardy	0	1	Not available	2189686	2146503	98.03	66	12765	Pan-S		4.1.2	Euro-American	ungrouped	S	S	S	S
IT2313	SRR29126487	2020	Lombardy	0	0	Not available	1918718	1877986	97.88	57	19663	Pan-S		4.1.2	Euro-American	ungrouped	S	S	S	S
IT2314	SRR29126976	2020	Lombardy	1	1	Not available	1594763	1565140	98.14	49	29087	Pan-S		1.1.3	EAI	group_62	S	S	S	S
IT2315	SRR29126971	2020	Lombardy	0	1	Not available	2581952	2545857	98.6	81	34509	Pan-S		4.4.1.1	S-type	ungrouped	S	S	S	S
IT2316	SRR29126969	2020	Lombardy	0	0	Not available	2109619	2071344	98.19	65	34927	Pan-S		4.1.2.1	Haarlem	group_73	S	S	S	S
IT2317	SRR29126393	2020	Lombardy	0	0	Not available	2208429	2147474	97.24	67	31231	Pan-S		4.4.1.1	S-type	ungrouped	S	S	S	S
IT2318	SRR29126477	2020	Lombardy	1	0	Not available	2386877	2303790	96.52	71	30019	Pan-S		4.3.3	LAM	ungrouped	S	S	S	S
IT2319	SRR29126483	2020	Lombardy	0	1	Not available	2197212	2167739	98.66	66	22563	Pan-S		4.8	mainly T	ungrouped	S	S	S	S
IT2320	SRR29126982	2020	Lombardy	1	0	Not available	2776242	2727508	98.24	80	22677	Pan-S		4.1.2.1	Haarlem	ungrouped	S	S	S	S
IT2321	SRR29126977	2020	Lombardy	1	0	Not available	2027439	2003668	98.83	62	28056	Pan-S		4.3.3	LAM	group_116	S	S	S	S
IT2323	SRR29126963	2020	Lombardy	0	0	Not available	2090201	2059200	98.52	61	19496	Pan-S		4.8	mainly T	ungrouped	S	S	S	S
IT2324	SRR29126972	2020	Lombardy	1	0	Not available	2494585	2455706	98.44	75	55810	Pan-S		6	West-Africa 2	group_114	S	S	S	S
IT2325	SRR29126970	2020	Lombardy	1	1	Not available	2319373	2289573	98.72	69	19210	Pan-S		3	Delhi-CAS	ungrouped	S	S	S	S
IT2326	SRR29126988	2020	Lombardy	0	0	Not available	3683951	3591714	97.5	98	16822	Pan-S		4.2.1	Ural	group_10	S	S	S	S
IT2327	SRR29126987	2020	Lombardy	0	0	Not available	2501722	2456209	98.18	71	41215	Pan-S		2.2.1	Beijing	group_212	S	S	S	S
IT2328	SRR29126959	2020	Lombardy	1	1	Not available	3106819	3050587	98.19	89	14223	Pan-S		4.2.1	Ural	ungrouped	S	S	S	S
IT2329	SRR29126488	2020	Lombardy	1	1	Not available	2082040	2052507	98.58	62	33398	Pan-S		3	Delhi-CAS	ungrouped	S	S	S	S
IT2330	SRR29126489	2020	Lombardy	1	1	Not available	2840182	2798282	98.52	82	16757	Pan-S		4.8	mainly T	ungrouped	S	S	S	S
IT2331	SRR29126986	2020	Lombardy	0	0	Not available	1926490	1909267	99.11	61	25243	Pan-S		4.8	mainly T	ungrouped	S	S	S	S
IT2333	SRR29126298	2019	Lombardy	0	0	Not available	2987229	2945716	98.61	90	67192	Pan-S		4.3.4.2	LAM	ungrouped	S	S	S	S
IT2334	SRR29126309	2019	Lombardy	1	0	Not available	3713258	3599235	96.93	103	10467	Pan-S		4.1.1	X-type	ungrouped	S	S	S	S
IT2335	SRR29126981	2020	Lombardy	1	0	Not available	2163309	2130874	98.5	64	24728	Pan-S		4.1.2.1	Haarlem	group_66	S	S	S	S
IT2336	SRR29126974	2020	Lombardy	1	1	Not available	2417129	1817350	75.19	56	20499	MDR	fabG1_ups:T-8C- 1673432, katG:Ser315Thr, rpoB:Ser450Leu	4.1	Euro-American	ungrouped	R	R	R	R	R	S
IT2337	SRR29126485	2020	Lombardy	0	0	Not available	1643943	1626930	98.97	51	47308	Pan-S		2.2.1	Beijing	group_212	S	S	S	S
IT2338	SRR29126476	2020	Lombardy	0	0	Not available	2118297	2039609	96.29	65	48184	Pan-S		2.2.1	Beijing	group_212	S	S	S	S
IT2339	SRR29126979	2020	Lombardy	1	0	Not available	2147950	2118944	98.65	65	21207	Pan-S		3.1.1	Delhi-CAS	group_141	S	S	S	S
IT2340	SRR29126961	2020	Lombardy	0	1	Not available	1774860	1756787	98.98	56	39849	Pan-S		4.4.1.1	S-type	ungrouped	S	S	S	S
IT2341	SRR29126678	2019	Lombardy	0	0	Not available	2077990	2054181	98.85	64	26241	Pan-S		4.3.3	LAM	group_229	S	S	S	S
IT2342	SRR29126479	2020	Lombardy	Not available	0	Not available	2372052	2338405	98.58	74	37429	Pan-S		5	West-Africa 1	ungrouped	S	S	S	S
IT2343	SRR29126966	2020	Lombardy	1	1	Not available	2222770	2194428	98.72	70	21605	Pan-S		1.2.1	EAI Manila	ungrouped	S	S	S	S
IT2344	SRR29126990	2020	Lombardy	1	0	Not available	2915332	2877746	98.71	91	29608	Pan-S		5	West-Africa 1	ungrouped	S	S	S	S
IT2345	SRR29126965	2020	Lombardy	0	0	Not available	2682663	2651317	98.83	83	14385	Pan-S		4.8	mainly T	ungrouped	S	S	S	S
IT2346	SRR29126480	2020	Lombardy	1	1	Not available	2947620	2913593	98.85	91	14540	Pan-S		4.8	mainly T	ungrouped	S	S	S	S
IT2347	SRR29126252	2020	Lombardy	1	0	Not available	2750683	2719090	98.85	85	17864	Mono-INH	fabG1_ups:G-17T- 1673423	4	Euro-American	ungrouped	R	S	S	S	S
IT2348	SRR29126260	2020	Lombardy	1	0	Not available	1564176	1541788	98.57	49	44794	Pan-S		1.1.3	EAI	ungrouped	S	S	S	S
IT2349	SRR29126259	2020	Lombardy	1	0	Not available	2356701	2314400	98.21	70	35320	Pan-S		1.2.1	EAI Manila	ungrouped	S	S	S	S
IT2350	SRR29126481	2020	Lombardy	0	0	Not available	3530105	3468475	98.25	109	20496	Pan-S		4.2.1	Ural	group_10	S	S	S	S
IT2351	SRR29126989	2020	Lombardy	1	0	Not available	2542158	2511491	98.79	78	41052	Pan-S		2.2.1	Beijing	group_197	S	S	S	S
IT2352	SRR31008607	2020	Lombardy	1	1	Not available	4038764	3949899	97.8	112	93388	Other	pncA:His57Asp	M. bovis	M. bovis	ungrouped	S	S	S	R
IT2353	SRR29126261	2020	Lombardy	1	0	Not available	2914630	2869807	98.46	88	14960	Pan-S		3	Delhi-CAS	ungrouped	S	S	S	S
IT2354	SRR29126980	2020	Lombardy	1	0	Not available	3038243	2770108	91.17	86	52276	Pan-S		6	West-Africa 2	ungrouped	S	S	S	S
IT2356	SRR29126769	2019	Lombardy	1	0	Not available	3495879	3442460	98.47	105	38509	Pan-S		2.2.1	Beijing	ungrouped	S	S	S	S
IT2357	SRR29126770	2019	Lombardy	0	0	Not available	3489242	3442524	98.66	105	21111	Pan-S		4.8	mainly T	ungrouped	S	S	S	S
IT2359	SRR29126522	2019	Lombardy	0	0	Not available	3858798	3619293	93.79	115	22006	Pan-S		4.1.2.1	Haarlem	ungrouped	S	S	S	S
IT2360	SRR29126150	2019	Lombardy	1	0	Not available	2567614	2521549	98.21	79	17232	Pan-S		4.8	mainly T	ungrouped	S	S	S	S
IT2361	SRR29126151	2019	Lombardy	1	1	Not available	2658034	2619878	98.56	82	23315	Pan-S		4.1.2.1	Haarlem	ungrouped	S	S	S	S
IT2362	SRR29126152	2019	Lombardy	1	0	Not available	2152107	2096356	97.41	67	37011	Pan-S		4.1.2.1	Haarlem	group_32	S	S	S	S
IT2363	SRR29126153	2019	Lombardy	1	0	Not available	2811408	2751567	97.87	86	41266	Pan-S		2.2.1	Beijing	ungrouped	S	S	S	S
IT2364	SRR29126155	2019	Lombardy	1	0	Not available	2497635	2417459	96.79	77	36905	Pan-S		3	Delhi-CAS	ungrouped	S	S	S	S
IT2365	SRR29126158	2019	Lombardy	1	0	Not available	2154165	2085490	96.81	67	53981	Pan-S		4.6.2.2	Cameroon	ungrouped	S	S	S	S
IT2366	SRR29126527	2019	Lombardy	1	1	Not available	2429573	2287859	94.17	71	51781	Pan-S		4.1.2.1	Haarlem	ungrouped	S	S	S	S
IT2367	SRR29126525	2019	Lombardy	1	1	Not available	3306422	3178949	96.14	99	20448	Pan-S		1.2.1	EAI Manila	ungrouped	S	S	S	S
IT2369	SRR29126145	2019	Lombardy	1	1	Not available	2878544	2753112	95.64	85	42382	Pan-S		2.2.1	Beijing	group_212	S	S	S	S
IT2370	SRR31008596	2019	Lombardy	1	1	Not available	2245017	2186417	97.39	71	87121	Other	pncA:His57Asp	M. bovis	M. bovis	ungrouped	S	S	S	R
IT2371	SRR29126530	2019	Lombardy	1	0	Not available	3739288	3497609	93.54	108	51102	Pan-S		4.6.2.2	Cameroon	ungrouped	S	S	S	S
IT2372	SRR29126532	2019	Lombardy	1	1	Not available	3476964	3323912	95.6	104	30628	Pan-S		3.1.2.1	Delhi-CAS	ungrouped	S	S	S	S
IT2374	SRR29126154	2019	Lombardy	1	0	Not available	2870074	2750810	95.84	89	52069	Pan-S		4.3.1	LAM	group_248	S	S	S	S
IT2375	SRR29126146	2019	Lombardy	1	1	Not available	4189089	3780989	90.26	120	27459	Pan-S		4.1.2.1	Haarlem	ungrouped	S	S	S	S
IT2377	SRR29126967	2019	Lombardy	1	1	Not available	2959058	2508712	84.78	74	23139	Pan-S		4.3.1	LAM	ungrouped	S	S	S	S
IT2378	SRR29126144	2019	Lombardy	1	0	Not available	3654461	3510115	96.05	106	36539	Pan-S		2.2.1	Beijing	ungrouped	S	S	S	S
IT2379	SRR29126985	2019	Lombardy	1	0	Not available	2890190	2820684	97.6	86	13366	Pan-S		3	Delhi-CAS	ungrouped	S	S	S	S
IT2380	SRR29126264	2019	Lombardy	1	1	Not available	2533912	2037821	80.42	55	48745	Pan-S		4.4.1.2	Euro-American	ungrouped	S	S	S	S
IT2382	SRR29126526	2019	Lombardy	0	0	Not available	3349533	3108288	92.8	95	33940	Pan-S		4.1.2.1	Haarlem	ungrouped	S	S	S	S
IT2383	SRR29126610	2019	Lombardy	0	1	Not available	3081498	2989475	97.01	95	41486	Pan-S		4.4.1.1	S-type	group_105	S	S	S	S
IT2384	SRR29126968	2019	Lombardy	0	1	Not available	2899091	2222780	76.67	55	32211	Pan-S		4.7	mainly T	ungrouped	S	S	S	S
IT2385	SRR29126529	2019	Lombardy	0	0	Not available	3416411	3279517	95.99	97	25784	Pan-S		4.1	Euro-American	ungrouped	S	S	S	S
IT2386	SRR29126148	2019	Lombardy	1	1	Not available	2225092	2192264	98.52	67	25882	Mono-INH	fabG1_ups:C-15T- 1673425	3	Delhi-CAS	ungrouped	R	S	S	S
IT2387	SRR29126147	2019	Lombardy	1	1	Not available	2219414	2134016	96.15	65	22202	Mono-FQs	gyrA: Asp94Gly	4.1.2.1	Haarlem	ungrouped	S	S	S	S
IT2388	SRR29126206	2019	Lombardy	1	0	Not available	3421240	3102605	90.69	85	24019	Other	rrs:1472337_C>T_SNP	4.3.2	LAM	ungrouped	S	S	S	S
IT2390	SRR29124285	2019	Lombardy	1	0	Not available	2675605	2609280	97.52	78	50193	Pan-S		4.1.2.1	Haarlem	ungrouped	S	S	R	S
IT2391	SRR29126390	2019	Lombardy	1	0	Not available	1816178	1783227	98.19	56	48389	Pan-S		4.8	mainly T	ungrouped	S	S	S	S
IT2392	SRR29126395	2019	Lombardy	1	0	Not available	2961533	2899608	97.91	85	36010	Pan-S		4.3.3	LAM	ungrouped	S	S	S	S
IT2393	SRR31008585	2019	Lombardy	1	1	Not available	2748030	2162783	78.7	63	96025	Other	pncA:His57Asp	M. bovis	M. bovis	group_4	S	S	S	R
IT2394	SRR29126531	2019	Lombardy	1	0	Not available	3214686	2980574	92.72	83	22173	Pan-S		4.1.2.1	Haarlem	group_180	S	S	S	S
IT2395	SRR29126208	2019	Lombardy	1	1	Not available	3150483	2876796	91.31	83	21354	Pan-S		5	West-Africa 1	ungrouped	S	S
IT2396	SRR29126613	2019	Lombardy	1	0	Not available	3080085	2829179	91.85	81	17566	Pan-S		4.4.1.1	S-type	ungrouped	S	S
IT2770	SRR31008898	2017	Emilia-Romagna	1	0	Not available	5408420	3050531	56.4	89	44616	Pan-S		2.2.1.1	Beijing	ungrouped	S	S	S	S
IT2771	SRR31008887	2017	Emilia-Romagna	1	0	Not available	4068749	2488317	61.16	73	60708	Pan-S		4.3.4.2	LAM	ungrouped	S	S	S	S
IT2778	SRR31008876	2017	Emilia-Romagna	1	0	Not available	3806671	1274761	33.49	37	26410	Pan-S		4.1.2.1	Haarlem	ungrouped	S	S	S	S
IT2780	SRR31008793	2017	Emilia-Romagna	1	1	Not available	4243289	1784828	42.06	51	26334	Pan-S		4.1.2.1	Haarlem	ungrouped	S	S	S	S
IT2781	SRR31008782	2017	Emilia-Romagna	1	1	Not available	2710891	1208837	44.59	34	39517	Pan-S		4.1.2.1	Haarlem	ungrouped	S	S	S	S
IT2785	SRR31008771	2017	Emilia-Romagna	1	0	Not available	3617964	3217995	88.94	86	1488	Pan-S		4.9	H37Rv-like	ungrouped	S	S	S	S
IT2786	SRR31008760	2017	Emilia-Romagna	1	0	Not available	4357801	4086139	93.77	119	43998	Pan-S		4.6.2.2	Cameroon	ungrouped	S	S	S	S
IT2789	SRR31008424	2017	Emilia-Romagna	1	1	Not available	3879095	3167064	81.64	89	30415	Pan-S		4.6.2.2	Cameroon	ungrouped	S	S	S	S
IT2790	SRR31008413	2017	Emilia-Romagna	1	1	Not available	4681634	4411716	94.23	122	76706	Other	pncA:His57Asp	M. bovis	M. bovis	ungrouped	S	S	S	R
IT2792	SRR31008402	2017	Emilia-Romagna	1	0	Not available	5589265	2819416	50.44	79	20724	Pan-S		4.3.1	LAM	group_35	S	S	S	S
IT2793	SRR31008571	2017	Emilia-Romagna	1	0	Not available	4285086	2815410	65.7	84	16323	Pan-S		4.1.2.1	Haarlem	ungrouped	S	S	S	S
IT2796	SRR31008560	2017	Emilia-Romagna	1	0	Not available	14076267	5443393	38.67	160	17727	Pan-S		4.3.1	LAM	group_35	S	S	S	S
IT2798	SRR31008549	2017	Emilia-Romagna	0	1	Not available	2187123	2085587	95.36	59	55166	Pan-S		4.3.4.2	LAM	ungrouped	S	S	S	S
IT2799	SRR31008862	2017	Emilia-Romagna	1	0	Not available	5202346	1401160	26.93	39	43903	Mono-INH	katG:Ser315Thr	4.6.2.2	Cameroon	ungrouped	R	S	S	S
IT2801	SRR31008851	2017	Emilia-Romagna	1	0	Not available	1893542	1814118	95.81	42	51171	Pan-S		3	Delhi-CAS	ungrouped	S	S	S	S
IT2803	SRR31008840	2017	Emilia-Romagna	1	0	Not available	5625858	5392476	95.85	161	20683	Pan-S		4.1.1.3	X-type	ungrouped	S	S	S	S
IT2804	SRR31008757	2017	Emilia-Romagna	1	0	Not available	3220877	1565805	48.61	44	43137	Pan-S		4.6.2.2	Cameroon	ungrouped	S	S	S	S
IT2805	SRR31008745	2017	Emilia-Romagna	0	0	Not available	2306902	2122178	91.99	55	9708	Pan-S		4.8	mainly T	ungrouped	S	S	S	S
IT2807	SRR31008734	2017	Emilia-Romagna	1	0	Not available	4727140	4598062	97.27	138	32270	Pan-S		4.1.1.1	X-type	ungrouped	S	S	S	S
IT2810	SRR31008399	2017	Emilia-Romagna	1	1	Not available	2199552	2129084	96.8	58	26386	Pan-S		4.3.1	LAM	ungrouped	S	S	S	S
IT2811	SRR31008388	2017	Emilia-Romagna	0	0	Not available	3446671	2114228	61.34	60	18346	Pan-S		4.8	mainly T	ungrouped	S	S	S	S
IT2813	SRR31008377	2017	Emilia-Romagna	1	0	Not available	5494372	3163915	57.58	86	10755	Pan-S		4.8	mainly T	ungrouped	S	S	S	S
IT2814	SRR31008366	2017	Emilia-Romagna	1	0	Not available	4763358	1207294	25.35	32	14101	Pan-S		4.8	mainly T	ungrouped	S	S	S	S
IT2816	SRR31008535	2017	Emilia-Romagna	1	1	Not available	3122118	3040522	97.39	92	24914	Pan-S		1.1.3	EAI	ungrouped	S	S	S	S
IT2817	SRR31008524	2017	Emilia-Romagna	0	0	Not available	3829675	3731699	97.44	106	21625	Pan-S		4.7	mainly T	ungrouped	S	S	S	S
IT2820	SRR31008513	2017	Emilia-Romagna	1	1	Not available	2136565	2043292	95.63	53	17680	Pan-S		3	Delhi-CAS	ungrouped	S	S	S	S
IT2821	SRR31008718	2017	Emilia-Romagna	0	1	Not available	3039617	2969160	97.68	90	25168	Pan-S		4.4.1.1	S-type	ungrouped	S	S	S	S
IT2822	SRR31008706	2017	Emilia-Romagna	1	0	Not available	5310892	4826045	90.87	140	48556	Pan-S		4.6.2.2	Cameroon	ungrouped	S	S	S	S
IT2824	SRR31008695	2017	Emilia-Romagna	0	0	Not available	3353981	2798255	83.43	83	17149	Pan-S		4.4.1.1	S-type	group_34	S	S	S	S
IT2825	SRR31008360	2017	Emilia-Romagna	1	0	Not available	2883326	2656123	92.12	79	21531	MDR	embB:Gly406Ala, katG:Ser315Thr, pncA:Thr76Pro, rpoB:Ser450Leu	4.2.2	Euro-American	group_216	R	R	S	R
IT2827	SRR31008349	2017	Emilia-Romagna	0	0	Not available	3068921	3004972	97.92	90	26910	Pan-S		4.4.1.1	S-type	ungrouped	S	S	S	S
IT2829	SRR31008338	2017	Emilia-Romagna	1	0	Not available	4359382	2613958	59.96	75	21859	Pan-S		4.4.1.1	S-type	group_34	S	S	S	S
IT2830	SRR31008331	2017	Emilia-Romagna	1	0	Not available	3237548	3076574	95.03	89	33832	Pan-S		4.3	LAM	ungrouped	S	S	S	S
IT2831	SRR31008330	2017	Emilia-Romagna	1	1	Not available	3386124	3318988	98.02	100	10804	Pan-S		4.8	mainly T	ungrouped	S	S	S	S
IT2832	SRR31008329	2017	Emilia-Romagna	1	1	Not available	1835958	1784790	97.21	51	15540	Mono-INH	katG:Ser315Thr	3	Delhi-CAS	ungrouped	R	S	S	S
IT2834	SRR31008328	2017	Emilia-Romagna	1	1	Not available	3421227	3224698	94.26	95	33708	Pan-S		1.2.2	EAI	ungrouped	S	S	S	R
IT2835	SRR31008327	2017	Emilia-Romagna	0	1	Not available	3105475	3029289	97.55	88	6309	Pan-S		4.1.1	X-type	ungrouped	S	S	S	S
IT2837	SRR31008325	2017	Emilia-Romagna	1	1	Not available	2077542	1985032	95.55	60	79573	Other	pncA:His57Asp	M. bovis	M. bovis	ungrouped	S	S	S	R
IT2838	SRR31008324	2017	Emilia-Romagna	0	0	Not available	4546181	4121683	90.66	116	12278	Pan-S		4.8	mainly T	ungrouped	S	S	S	S
IT2842	SRR31008323	2017	Emilia-Romagna	1	0	Not available	2262304	2192181	96.9	61	18519	Pan-S		4.3.1	LAM	group_35	S	S	S	S
IT2846	SRR31008321	2017	Emilia-Romagna	1	1	Not available	1208095	1145352	94.81	30	27255	Pan-S		4.1.2.1	Haarlem	group_115	S	S	S	S
IT2852	SRR31008320	2017	Emilia-Romagna	1	0	Not available	3803478	959091	25.22	26	44601	Pan-S		3	Delhi-CAS	ungrouped	S	S	S	S
IT2853	SRR31008319	2017	Emilia-Romagna	0	0	Not available	1752882	1703973	97.21	53	46572	Pan-S		4.8	mainly T	ungrouped	S	S	S	S
IT2854	SRR31008318	2017	Emilia-Romagna	1	0	Not available	5597149	4751284	84.89	126	16459	Pan-S		3.1.1	Delhi-CAS	ungrouped	S	S	S	S
IT2856	SRR31008317	2017	Emilia-Romagna	1	0	Not available	3053072	898108	29.42	25	53624	Pan-S		4.3.4.1	LAM	ungrouped	S	S	S	S
IT2858	SRR31008316	2017	Emilia-Romagna	1	0	Not available	1306967	1278686	97.84	35	51259	Pan-S		4.6.2.2	Cameroon	ungrouped	S	S	S	S
IT2859	SRR31008314	2017	Emilia-Romagna	1	0	Not available	1637278	1087516	66.42	28	19808	Pan-S		4.8	mainly T	ungrouped	S	S	S	S
IT2862	SRR31008313	2017	Emilia-Romagna	1	1	Not available	3518523	1873801	53.26	46	14031	Pan-S		3	Delhi-CAS	ungrouped	S	S	S	S
IT2866	SRR31008312	2017	Emilia-Romagna	0	0	Not available	5971328	1979430	33.15	56	73406	Pan-S		4.3.4.2	LAM	ungrouped	S	S	S	S
IT2867	SRR31008311	2017	Emilia-Romagna	1	0	Not available	2940194	1675096	56.97	49	35757	Pan-S		4.2.1	Ural	ungrouped	S	S	S	S
IT2870	SRR31008310	2017	Emilia-Romagna	1	1	Not available	3634657	1397749	38.46	39	43309	Pan-S		2.2.1	Beijing	ungrouped	S	S	S	S
IT2875	SRR31008955	2018	Emilia-Romagna	1	0	Not available	6267760	2438394	38.9	67	22305	Pan-S		4.1.2.1	Haarlem	group_182	S	S	S	S
IT2878	SRR31008954	2018	Emilia-Romagna	1	0	Not available	2547121	2440637	95.82	68	24335	Pan-S		4.1.2.1	Haarlem	group_196	S	S	S	S
IT2880	SRR31008953	2018	Emilia-Romagna	0	1	Not available	2118550	1149181	54.24	35	25209	Mono-FQs	gyrA: Gly88Cys	4.1.2.1	Haarlem	ungrouped	S	S	S	S
IT2881	SRR31008952	2018	Emilia-Romagna	1	1	Not available	5457876	4119349	75.48	117	18381	Pan-S		4.4.1.1	S-type	group_172	S	S	S	S
IT2882	SRR31008951	2018	Emilia-Romagna	1	0	Not available	1412577	1367523	96.81	33	18241	Pan-S		4.4.1.1	S-type	group_172	S	S	S	S
IT2886	SRR31008949	2018	Emilia-Romagna	1	0	Not available	3910003	2819863	72.12	84	12432	Pan-S		4	Euro-American	ungrouped	S	S	S	S
IT2887	SRR31008948	2018	Emilia-Romagna	0	0	Not available	6361922	4906947	77.13	136	6872	Pan-S		4.8	mainly T	ungrouped	S	S	S	S
IT2889	SRR31008947	2018	Emilia-Romagna	0	0	Not available	4781756	1339060	28	38	26208	Pan-S		4.3.1	LAM	ungrouped	S	S	S	S
IT2891	SRR31008946	2018	Emilia-Romagna	0	1	Not available	5912173	5139950	86.94	142	15455	Pan-S		4.8	mainly T	ungrouped	S	S	S	S
IT2894	SRR31008945	2018	Emilia-Romagna	1	0	Not available	5022195	957262	19.06	25	22745	Pan-S		4.8	mainly T	ungrouped	S	S	S	S
IT2896	SRR31008944	2018	Emilia-Romagna	0	0	Not available	5715611	4290745	75.07	122	6304	Pan-S		4.8	mainly T	ungrouped	S	S	S	S
IT2898	SRR31008943	2018	Emilia-Romagna	1	0	Not available	5079786	2033900	40.04	55	27363	Pan-S		4.8	mainly T	ungrouped	S	S	S	S
IT2899	SRR31008942	2018	Emilia-Romagna	1	1	Not available	1011416	974479	96.35	22	26675	Pan-S		3	Delhi-CAS	ungrouped	S	S	S	S
IT2900	SRR31008941	2018	Emilia-Romagna	1	0	Not available	2046724	1971765	96.34	51	13754	Pan-S		4.3.1	LAM	ungrouped	S	S	S	S
IT2903	SRR31008940	2018	Emilia-Romagna	0	0	Not available	2637512	2567689	97.35	73	16160	pre_XDR	gyrA: Asp94Gly , katG: Ser315Thr, rpoB: Leu430Pro, rpsL:Lys43Arg	2.2.1	Beijing	ungrouped	R	R	S	S
IT2905	SRR31008684	2018	Emilia-Romagna	1	1	Not available	3373573	3286480	97.42	95	22010	Pan-S		4.1.2.1	Haarlem	ungrouped	S	S	S	S
IT2907	SRR31008683	2018	Emilia-Romagna	1	0	Not available	1378353	1315598	95.45	33	19534	Poly-resistant	embB:Met306Val , katG:Ser315Thr	4.1	Euro-American	ungrouped	R	S	S	S
IT2909	SRR31008682	2018	Emilia-Romagna	1	1	Not available	4043572	3921665	96.99	58	17885	Pan-S		3	Delhi-CAS	ungrouped	S	S	S	S
IT2912	SRR31008681	2018	Emilia-Romagna	1	1	Not available	2211380	2128615	96.26	61	25894	Pan-S		4.7	mainly T	group_236	S	S	S	S
IT2913	SRR31008680	2018	Emilia-Romagna	1	0	Not available	998988	874177	87.51	26	37040	Pan-S		4.8	mainly T	ungrouped	S	S	S	S
IT2915	SRR31008679	2018	Emilia-Romagna	1	0	Not available	2910225	2233439	76.74	62	17201	Pan-S		4.5	Euro-American	ungrouped	S	S	S	S
IT2916	SRR31008678	2018	Emilia-Romagna	0	0	Not available	3187057	3104060	97.4	89	24336	Pan-S		4.1.2.1	Haarlem	ungrouped	S	S	S	S
IT2918	SRR31008677	2018	Emilia-Romagna	1	1	Not available	4272213	3793980	88.81	116	18405	Pan-S		4.1.2.1	Haarlem	ungrouped	S	S	S	S
IT2919	SRR31008676	2018	Emilia-Romagna	1	0	Not available	5808163	5702874	98.19	173	51239	Pan-S		4.3.4.2	LAM	group_185	S	S	S	S
IT2920	SRR31008675	2018	Emilia-Romagna	1	0	Not available	2647848	2492028	94.12	73	15272	Pan-S		4.8	mainly T	ungrouped	S	S	S	S
IT2921	SRR31008673	2018	Emilia-Romagna	1	0	Not available	2458206	2373753	96.56	63	17806	Pan-S		4.1.2.1	Haarlem	group_182	S	S	S	S
IT2922	SRR31008672	2018	Emilia-Romagna	1	1	Not available	4617621	4484673	97.12	125	26255	Pan-S		4.1.2.1	Haarlem	ungrouped	S	S	S	S
IT2923	SRR31008671	2018	Emilia-Romagna	0	1	Not available	4080590	3899184	95.55	93	102736	Other	pncA:His57Asp	M. bovis	M. bovis	group_48	S	S	S	R
IT2924	SRR31008670	2018	Emilia-Romagna	1	1	Not available	2101231	2048539	97.49	62	24630	Pan-S		4.3.3	LAM	ungrouped	S	S	S	S
IT2925	SRR31008669	2018	Emilia-Romagna	0	0	Not available	3406684	3162141	92.82	69	20570	Pan-S		4.3.3	LAM	ungrouped	S	S	S	S
IT2926	SRR31008668	2018	Emilia-Romagna	1	0	Not available	3767666	3694979	98.07	113	17815	Pan-S		4.1.2.1	Haarlem	ungrouped	S	S	S	S
IT2927	SRR31008667	2018	Emilia-Romagna	1	0	Not available	1478745	1422263	96.18	32	19130	Pan-S		3	Delhi-CAS	group_254	S	S	S	S
IT2930	SRR31008666	2018	Emilia-Romagna	0	0	Not available	2131546	2089236	98.02	63	24358	Mono-INH	katG:Ser315Thr	4.4.1.1	S-type	ungrouped	R	S	S	S
IT2932	SRR31008665	2018	Emilia-Romagna	1	0	Not available	1618357	1110910	68.64	22	81423	Pan-S		3.1.1	Delhi-CAS	ungrouped	S	S	S	S
IT2936	SRR31008664	2018	Emilia-Romagna	0	0	Not available	2291966	2226584	97.15	65	22717	Pan-S		4.3.1	LAM	group_68	S	S	S	S
IT2940	SRR31008662	2018	Emilia-Romagna	1	0	Not available	2725585	2642303	96.94	76	6305	Poly-resistant	embB:His1002Arg , katG:Ser315Thr, pncA:Thr76Pro	4.2.1	Ural	ungrouped	R	S	S	R
IT2941	SRR31008661	2018	Emilia-Romagna	0	1	Not available	3897661	3827243	98.19	117	19645	Pan-S		4.8	mainly T	ungrouped	S	S	S	S
IT2942	SRR31008660	2018	Emilia-Romagna	0	0	Not available	2583817	2454739	95	71	23862	Pan-S		4.1	Euro-American	ungrouped	S	S	S	S
IT2945	SRR31008659	2018	Emilia-Romagna	0	1	Not available	3081231	2999841	97.36	87	23616	Pan-S		4.3.3	LAM	ungrouped	S	S	S	S
IT2947	SRR31008658	2018	Emilia-Romagna	1	1	Not available	1696327	1607142	94.74	45	20706	Pan-S		4.3.3	LAM	ungrouped	S	S	S	S
IT2948	SRR31008657	2018	Emilia-Romagna	1	0	Not available	3824561	3737013	97.71	111	25392	Pan-S		4.7	mainly T	group_236	S	S	S	S
IT2949	SRR31008656	2018	Emilia-Romagna	0	0	Not available	2718185	2645810	97.34	75	13043	Pan-S		4.8	mainly T	ungrouped	S	S	S	S
IT2950	SRR31008655	2018	Emilia-Romagna	0	0	Not available	3983176	2952463	74.12	91	19238	Pan-S		4.8	mainly T	ungrouped	S	S	S	S
IT2951	SRR31008654	2018	Emilia-Romagna	1	0	Not available	1343209	1287659	95.86	35	27280	Pan-S		4.1.2.1	Haarlem	group_9	S	S	S	S
IT2952	SRR31008653	2018	Emilia-Romagna	0	0	Not available	3070878	2989229	97.34	85	20332	Pan-S		4.1.2.1	Haarlem	ungrouped	S	S	S	S
IT2953	SRR31008507	2018	Emilia-Romagna	1	0	Not available	5809015	5590205	96.23	160	8399	Mono-INH	fabG1_ups:C-15T- 1673425	3	Delhi-CAS	ungrouped	R	S	S	S
IT2954	SRR31008506	2018	Emilia-Romagna	1	0	Not available	6318425	6172764	97.69	181	6845	Pan-S		4.1	Euro-American	ungrouped	S	S	S	S
IT2955	SRR31008505	2018	Emilia-Romagna	1	0	Not available	4753501	4612500	97.03	137	10501	Pan-S		4.5	Euro-American	group_199	S	S	S	S
IT2957	SRR31008504	2018	Emilia-Romagna	1	0	Not available	3519666	3205958	91.09	98	18829	Pan-S		4.3.1	LAM	group_39	S	S	S	S
IT2959	SRR31008503	2018	Emilia-Romagna	0	0	Not available	5929571	5823994	98.22	180	12965	Pan-S		4.3.1	LAM	group_22	S	S	S	S
IT2962	SRR31008502	2018	Emilia-Romagna	1	0	Not available	3692910	3581012	96.97	101	25774	Pan-S		4.3.1	LAM	ungrouped	S	S	S	S
IT2963	SRR31008501	2018	Emilia-Romagna	1	0	Not available	6588880	6084390	92.34	188	31927	Mono-INH	fabG1_ups:C-15T- 1673425	4.3	LAM	ungrouped	R	S	S	S
IT2964	SRR31008500	2018	Emilia-Romagna	1	1	Not available	7776615	7571235	97.36	222	18073	Pan-S		4.1.2.1	Haarlem	ungrouped	S	S	S	S
IT2965	SRR31008499	2018	Emilia-Romagna	1	0	Not available	8421828	8222243	97.63	253	38713	Pan-S		4.1.2.1	Haarlem	ungrouped	S	S	S	S
IT2967	SRR31008498	2018	Emilia-Romagna	1	0	Not available	5565092	5030012	90.39	144	20406	Pan-S		4.2.2	Euro-American	group_38	S	S	S	S
IT2968	SRR31008496	2018	Emilia-Romagna	1	1	Not available	7148143	6994881	97.86	210	20286	Pan-S		4.3.1	LAM	group_68	S	S	S	S
IT2972	SRR31008495	2019	Emilia-Romagna	1	0	Not available	5437026	5311177	97.69	156	17886	Other	rrs:1472337_C>T_SNP	4.3.2	LAM	group_205	S	S	S	S
IT2978	SRR31008494	2019	Emilia-Romagna	0	0	Not available	1208431	903241	74.74	25	16237	Pan-S		4.8	mainly T	ungrouped	S	S	S	S
IT2992	SRR31008493	2019	Emilia-Romagna	0	0	Not available	2561017	1975761	77.15	61	30018	Pan-S		4.3.3	LAM	group_219	S	S	S	S
IT2994	SRR31008492	2019	Emilia-Romagna	1	0	Not available	4388928	4287758	97.69	127	16440	Pan-S		4.1.2	Euro-American	ungrouped	S	S	S	S
IT2995	SRR31008491	2019	Emilia-Romagna	1	0	Not available	1110522	1090589	98.21	33	45420	Pan-S		4.8	mainly T	ungrouped	S	S	S	S
IT2996	SRR31008490	2019	Emilia-Romagna	1	0	Not available	1319865	1293739	98.02	40	78081	Pan-S		4.1.2.1	Haarlem	group_182	S	S	S	S
IT2998	SRR31008489	2019	Emilia-Romagna	1	0	Not available	2173543	2137144	98.33	67	70868	Pan-S		4.1.2.1	Haarlem	ungrouped	S	S	S	S
IT3001	SRR31008488	2019	Emilia-Romagna	1	1	Not available	950852	930525	97.86	27	57370	Pan-S		4.6.2.2	Cameroon	ungrouped	S	S	S	S
IT3003	SRR31008487	2019	Emilia-Romagna	1	0	Not available	1035567	999579	96.52	26	27574	Pan-S		4.8	mainly T	ungrouped	S	S	S	S
IT3005	SRR31008485	2019	Emilia-Romagna	1	0	Not available	5248166	5140605	97.95	157	26053	Pan-S		4.1.2.1	Haarlem	ungrouped	S	S	S	S
IT3006	SRR31008484	2019	Emilia-Romagna	1	0	Not available	2399726	2303765	96	41	19014	Pan-S		4.1.2.1	Haarlem	group_182	S	S	S	S
IT3011	SRR31008480	2019	Emilia-Romagna	1	0	Not available	1368247	1336414	97.67	39	16661	Pan-S		3.1.2.1	Delhi-CAS	ungrouped	S	S	S	S
IT3014	SRR31008479	2019	Emilia-Romagna	0	0	Not available	685148	669832	97.76	20	69456	Pan-S		4.3.4.2	LAM	ungrouped	S	S	S	S
IT3017	SRR31008477	2019	Emilia-Romagna	1	1	Not available	2391736	2319946	97	65	28632	Pan-S		4.7	mainly T	ungrouped	S	S	S	S
IT3018	SRR31008476	2019	Emilia-Romagna	1	0	Not available	3988313	3890464	97.55	115	22032	Pan-S		4.2.2	Euro-American	group_38	S	S	S	S
IT3019	SRR31008474	2019	Emilia-Romagna	1	1	Not available	5716180	5609885	98.14	172	11599	Pan-S		3	Delhi-CAS	ungrouped	S	S	S	S
IT3020	SRR31008473	2019	Emilia-Romagna	1	0	Not available	3962963	3861169	97.43	105	11806	Pan-S		4.1.2	Euro-American	ungrouped	S	S	S	S
IT3022	SRR31008472	2019	Emilia-Romagna	0	1	Not available	1542288	1500257	97.27	38	29840	Pan-S		4.1.2.1	Haarlem	ungrouped	S	S	S	S
IT3023	SRR31008651	2019	Emilia-Romagna	1	0	Not available	1671424	1153832	69.03	32	19999	Pan-S		1.2.1	EAI Manila	ungrouped	S	S	S	S
IT3025	SRR31008650	2019	Emilia-Romagna	1	1	Not available	903725	878849	97.25	25	27041	Pan-S		4.3.3	LAM	ungrouped	S	S	S	S
IT3028	SRR31008649	2019	Emilia-Romagna	0	0	Not available	1681753	1653593	98.33	53	26621	Pan-S		4.1.2.1	Haarlem	ungrouped	S	S	S	S
IT3030	SRR31008648	2019	Emilia-Romagna	1	0	Not available	1020354	982898	96.33	25	25253	Pan-S		4.2.2	Euro-American	ungrouped	S	S	S	S
IT3032	SRR31008647	2019	Emilia-Romagna	0	0	Not available	3662423	3574654	97.6	103	18475	Pan-S		4.1.2.1	Haarlem	ungrouped	S	S	S	S
IT3033	SRR31008646	2019	Emilia-Romagna	1	0	Not available	3152738	3070600	97.39	83	13323	Pan-S		3	Delhi-CAS	group_103	S	S	S	S
IT3034	SRR31008645	2019	Emilia-Romagna	1	1	Not available	3328480	2629138	78.99	74	17600	Pan-S		4.8	mainly T	ungrouped	S	S	S	S
IT3036	SRR31008643	2019	Emilia-Romagna	1	0	Not available	1703386	1650235	96.88	49	17394	Pan-S		4.8	mainly T	group_171	S	S	S	S
IT3037	SRR31008642	2019	Emilia-Romagna	1	0	Not available	1454674	1425141	97.97	42	29261	Pan-S		4.7	mainly T	group_236	S	S	S	S
IT3040	SRR31008641	2019	Emilia-Romagna	1	0	Not available	1788864	1748198	97.73	53	32839	Pan-S		4.1.2.1	Haarlem	ungrouped	S	S	S	S
IT3041	SRR31008640	2019	Emilia-Romagna	1	0	Not available	5157169	5056439	98.05	154	15204	Pan-S		3	Delhi-CAS	group_103	S	S	S	S
IT3042	SRR31008639	2019	Emilia-Romagna	0	1	Not available	3339188	3279390	98.21	100	34537	Pan-S		4.1.2.1	Haarlem	ungrouped	S	S	S	S
IT3043	SRR31008638	2019	Emilia-Romagna	1	1	Not available	3347995	3275067	97.82	99	29397	Pan-S		4.1.2.1	Haarlem	ungrouped	S	S	S	S
IT3047	SRR31008637	2019	Emilia-Romagna	1	0	Not available	2007878	1967087	97.97	59	21048	Pan-S		4.1.2.1	Haarlem	group_182	S	S	S	S
IT3048	SRR31008636	2019	Emilia-Romagna	1	1	Not available	2984111	2929778	98.18	90	16672	Pan-S		3	Delhi-CAS	group_103	S	S	S	S
IT3050	SRR31008635	2019	Emilia-Romagna	0	0	Not available	4123603	4055161	98.34	123	27490	Pan-S		4.7	mainly T	ungrouped	S	S	S	S
IT3057	SRR31008634	2020	Emilia-Romagna	1	0	Not available	3624828	3003142	82.85	88	18548	Pan-S		4.1.2.1	Haarlem	ungrouped	S	S	S	S
IT3058	SRR31008632	2020	Emilia-Romagna	1	1	Not available	2439066	2099545	86.08	53	45258	Other	embB:Met306Ile	4.6.2.2	Cameroon	ungrouped	S	S	S	S
IT3059	SRR31008631	2020	Emilia-Romagna	0	1	Not available	2558813	1906924	74.52	52	20454	Pan-S		4.1.2.1	Haarlem	group_239	S	S	S	S
IT3060	SRR31008630	2020	Emilia-Romagna	0	1	Not available	2439129	1519380	62.29	41	25006	Pan-S		4.1.2.1	Haarlem	ungrouped	S	S	S	S
IT3061	SRR31008629	2020	Emilia-Romagna	1	0	Not available	1433450	1407525	98.19	44	21002	Pan-S		4.3.1	LAM	group_39	S	S	S	S
IT3062	SRR31008628	2020	Emilia-Romagna	0	1	Not available	1710012	1677553	98.1	52	22867	Pan-S		4.7	mainly T	ungrouped	S	S	S	S
IT3063	SRR31008627	2020	Emilia-Romagna	1	0	Not available	3004909	1391117	46.29	35	20569	Pan-S		4.8	mainly T	ungrouped	S	S	S	S
IT3064	SRR31008626	2020	Emilia-Romagna	1	1	Not available	1979778	1900822	96.01	58	17998	Pan-S		4.1.2.1	Haarlem	ungrouped	S	S	S	S
IT3065	SRR31008625	2020	Emilia-Romagna	1	0	Not available	3132339	3074501	98.15	97	18398	Pan-S		3	Delhi-CAS	group_132	S	S	S	S
IT3066	SRR31008624	2020	Emilia-Romagna	0	0	Not available	1923407	1893610	98.45	58	28753	Pan-S		4.1.2.1	Haarlem	group_9	S	S	S	S
IT3068	SRR31008623	2020	Emilia-Romagna	0	0	Not available	3392222	2514461	74.12	71	49590	Pan-S		2.1	East-Asian non-Beijing	ungrouped	S	S	S	S
IT3070	SRR31008621	2020	Emilia-Romagna	1	1	Not available	3305773	2440696	73.83	66	40317	Pan-S		4.1.2.1	Haarlem	ungrouped	S	S	S	S
IT3073	SRR31008620	2020	Emilia-Romagna	1	1	Not available	2040017	1348027	66.08	38	50945	Pan-S		1.1.2	EAI	ungrouped	S	S	S	S
IT3074	SRR31008619	2020	Emilia-Romagna	1	1	Not available	3144034	1794963	57.09	51	25213	Other	rpsL:Lys88Arg	4.1.2.1	Haarlem	ungrouped	S	S	S	S
IT3075	SRR31008618	2020	Emilia-Romagna	1	0	Not available	2821808	2769387	98.14	89	42373	Pan-S		2.2.1	Beijing	ungrouped	S	S	S	S
IT3076	SRR31008617	2020	Emilia-Romagna	1	0	Not available	1733941	1176403	67.85	31	22280	Pan-S		3	Delhi-CAS	group_103	S	S	S	S
IT3078	SRR31008616	2020	Emilia-Romagna	1	0	Not available	3028060	2978587	98.37	96	36948	Pan-S		2.2.1	Beijing	ungrouped	S	S	S	S
IT3079	SRR31008939	2020	Emilia-Romagna	1	0	Not available	1333935	1311775	98.34	40	20989	Pan-S		4.1.2.1	Haarlem	group_143	S	S	S	S
IT3080	SRR31008938	2020	Emilia-Romagna	0	1	Not available	3019336	1522633	50.43	40	21297	Pan-S		4.1.2.1	Haarlem	group_182	S	S	S	S
IT3081	SRR31008937	2020	Emilia-Romagna	1	1	Not available	2498482	1518637	60.78	43	28217	Pan-S		4.4.1.1	S-type	ungrouped	S	S	S	S
IT3082	SRR31008936	2020	Emilia-Romagna	1	0	Not available	2355689	2240077	95.09	70	23580	Pan-S		4.3.3	LAM	ungrouped	S	S	S	S
IT3084	SRR31008933	2020	Emilia-Romagna	1	0	Not available	2186209	2145223	98.13	67	53652	Pan-S		4.3.4.2	LAM	group_241	S	S	S	S
IT3085	SRR31008932	2020	Emilia-Romagna	1	0	Not available	966173	941941	97.49	28	22666	Pan-S		4.1.2.1	Haarlem	group_182	S	S	S	S
IT3086	SRR31008931	2020	Emilia-Romagna	0	1	Not available	2306260	2256557	97.84	68	24675	Pan-S		4.7	mainly T	ungrouped	S	S	S	S
IT3087	SRR31008930	2020	Emilia-Romagna	1	1	Not available	1733942	1710208	98.63	52	22682	Pan-S		4.1	Euro-American	ungrouped	S	S	S	S
IT3089	SRR31008929	2020	Emilia-Romagna	1	0	Not available	3751594	3692827	98.43	109	18023	Poly-resistant	katG:Ser315Thr, rpsL:Lys43Arg	4.1.2.1	Haarlem	ungrouped	R	S	S	S
IT3090	SRR31008928	2020	Emilia-Romagna	0	0	Not available	2707060	1701120	62.84	50	19677	Pan-S		4.4.1.1	S-type	ungrouped	S	S	S	S
IT3092	SRR31008927	2020	Emilia-Romagna	0	1	Not available	2177799	2140197	98.27	64	14136	Pan-S		1.2.1	EAI Manila	ungrouped	S	S	S	S
IT3093	SRR31008926	2020	Emilia-Romagna	1	1	Not available	2925729	1825928	62.41	47	18266	Pan-S		3	Delhi-CAS	ungrouped	S	S	S	S
IT3095	SRR31008925	2020	Emilia-Romagna	0	0	Not available	2206767	2159340	97.85	65	11845	Pan-S		4.8	mainly T	ungrouped	S	S	S	S
IT3096	SRR31008924	2020	Emilia-Romagna	1	0	Not available	1325946	1296911	97.81	40	32857	Pan-S		1.1.3	EAI	ungrouped	S	S	S	S
IT3097	SRR31008922	2020	Emilia-Romagna	0	1	Not available	2427811	1840678	75.82	52	37412	Pan-S		1.1.3	EAI	ungrouped	S	S	S	S
IT3098	SRR31008921	2020	Emilia-Romagna	1	0	Not available	1457159	1433150	98.35	43	21380	Pan-S		3	Delhi-CAS	group_132	S	S	S	S
IT3099	SRR31008920	2020	Emilia-Romagna	1	1	Not available	1948802	1924044	98.73	59	32911	Pan-S		4.1.2.1	Haarlem	ungrouped	S	S	S	S
IT3100	SRR31008919	2020	Emilia-Romagna	1	0	Not available	1816484	1789909	98.54	54	9625	Pan-S		4.1	Euro-American	ungrouped	S	S	S	S
IT3101	SRR31008918	2020	Emilia-Romagna	1	0	Not available	3538909	2277765	64.36	57	13027	Pan-S		4.8	mainly T	ungrouped	S	S	S	S
IT3102	SRR31008917	2020	Emilia-Romagna	0	0	Not available	1100978	1079769	98.07	32	33453	Pan-S		4.4.1.1	S-type	ungrouped	S	S	S	S
IT3104	SRR31008916	2020	Emilia-Romagna	1	1	Not available	2244931	2200867	98.04	69	13361	Pan-S		3	Delhi-CAS	ungrouped	S	S	S	S
IT3108	SRR31008915	2020	Emilia-Romagna	1	0	Not available	3344674	3291291	98.4	105	14526	Other	rpsL:Lys43Arg	3	Delhi-CAS	ungrouped	S	S	S	S
IT3110	SRR31008914	2020	Emilia-Romagna	1	0	Not available	1147615	1128551	98.34	34	22313	Pan-S		4.1.2.1	Haarlem	group_182	S	S	S	S
IT3111	SRR31008913	2020	Emilia-Romagna	1	1	Not available	4457247	2827414	63.43	74	24352	Pan-S		4.1.2.1	Haarlem	group_239	S	S	S	S
IT3113	SRR31008911	2020	Emilia-Romagna	0	1	Not available	1321598	1304595	98.71	40	28682	Pan-S		4.3.3	LAM	ungrouped	S	S	S	S
IT3114	SRR31008910	2020	Emilia-Romagna	1	0	Not available	1434863	1407858	98.12	44	30333	Pan-S		4.1.2.1	Haarlem	ungrouped	S	S	S	S
IT3115	SRR31008909	2020	Emilia-Romagna	0	0	Not available	1178906	1163707	98.71	33	26285	Pan-S		4.8	mainly T	ungrouped	S	S	S	S
IT3116	SRR31008908	2020	Emilia-Romagna	1	0	Not available	1928602	1885271	97.75	58	10118	Pan-S		3	Delhi-CAS	ungrouped	S	S	S	S
IT3117	SRR31008907	2020	Emilia-Romagna	1	0	Not available	5041195	4191477	83.14	129	30223	Other	rrs:1472337_C>T_SNP	4.3.2	LAM	group_205	S	S	S	S
IT3118	SRR31008906	2020	Emilia-Romagna	0	0	Not available	2567635	2461489	95.87	77	17153	Pan-S		4.8	mainly T	ungrouped	S	S	S	S
IT3120	SRR31008905	2020	Emilia-Romagna	1	1	Not available	2757744	1553498	56.33	41	53001	Pan-S		4.3.4.2	LAM	ungrouped	S	S	S	S
IT3121	SRR31008904	2020	Emilia-Romagna	1	Not available	Not available	3639594	2765174	75.97	85	10632	Pan-S		4.8	mainly T	ungrouped	S	S	S	S
IT3122	SRR31008831	2020	Emilia-Romagna	0	Not available	Not available	2696980	1754924	65.07	50	28552	Pan-S		4.1.2.1	Haarlem	group_9	S	S	S	S
IT3124	SRR31008830	2020	Emilia-Romagna	0	0	Not available	2235551	2200646	98.44	67	21424	Pan-S		4.3.1	LAM	group_68	S	S	S	S
IT3126	SRR31008828	2020	Emilia-Romagna	0	1	Not available	881794	870933	98.77	26	18538	Pan-S		4.3.1	LAM	group_22	S	S	S	S
IT3127	SRR31008827	2020	Emilia-Romagna	1	Not available	Not available	4141892	3979829	96.09	122	48466	Pan-S		6	West-Africa 2	ungrouped	S	S	S	S
IT3128	SRR31008826	2020	Emilia-Romagna	0	0	Not available	870962	857133	98.41	26	31513	Pan-S		4.1.2.1	Haarlem	group_9	S	S	S	S
IT3129	SRR31008825	2020	Emilia-Romagna	0	Not available	Not available	6485655	6358847	98.04	201	84776	Other	pncA:His57Asp	M. bovis	M. bovis	group_23	S	S	S	R
IT3130	SRR31008824	2020	Emilia-Romagna	1	0	Not available	2262058	2221890	98.22	66	11172	Pan-S		3.1.1	Delhi-CAS	ungrouped	S	S	S	S
IT3131	SRR31008823	2020	Emilia-Romagna	0	1	Not available	1316543	1297801	98.58	40	27179	Pan-S		4.1.2.1	Haarlem	ungrouped	S	S	S	S
IT3132	SRR31008822	2020	Emilia-Romagna	0	0	Not available	1191584	1175895	98.68	35	17829	Pan-S		4.4.1.1	S-type	ungrouped	S	S	S	S
IT3133	SRR31008821	2020	Emilia-Romagna	0	1	Not available	5641178	5535037	98.12	152	114711	Other	pncA:His57Asp	M. bovis	M. bovis	group_23	S	S	S	R
IT3134	SRR31008820	2019	Lombardy	0	0	Not available	1641168	1611718	98.21	49	29172	Pan-S		4.8	mainly T	group_137	S	S	S	R
IT3136	SRR29124282	2019	Lombardy	1	0	Not available	2577659	2504176	97.15	75	56705	Mono-INH	fabG1_ups:C-15T- 1673425	4.6.2.2	Cameroon	group_234	R	S	S	R
IT3137	SRR29124281	2019	Lombardy	1	0	Not available	1833603	1787753	97.5	53	43047	Pan-S		2.2.1	Beijing	group_40	S	S	S	S
IT3138	SRR29124280	2019	Lombardy	1	0	Not available	2282297	2225920	97.53	66	39038	Pan-S		2.2.1	Beijing	group_41	S	S	S	S
IT3140	SRR29124279	2019	Lombardy	1	0	Not available	2061432	1980274	96.06	60	56509	Pan-S		4.4.1.2	Euro-American	group_215	S	S	S	S
IT3141	SRR29124278	2019	Lombardy	1	0	Not available	3986887	3829338	96.05	115	32246	Pan-S		4.1.2.1	Haarlem	ungrouped	S	S	S	S
IT3142	SRR29124277	2019	Lombardy	0	0	Not available	886773	857944	96.75	26	76283	Pan-S		4.3.3	LAM	group_229	S	S	S	S
IT3143	SRR29124276	2019	Lombardy	0	1	Not available	4845722	3773756	77.88	109	16916	Pan-S		4.8	mainly T	group_206	S	S	S	S
IT3144	SRR31008819	2019	Lombardy	1	0	Not available	4418401	4148433	93.89	121	106102	Pan-S		M. orygis	M. orygis	ungrouped	S	s	s	s
IT3169	SRR29124274	2019	Lombardy	1	0	Not available	2640870	2539609	96.17	75	15338	Pan-S		4.4.2	Euro-American	ungrouped	S	S	S	S
IT3171	SRR29124273	2019	Lombardy	1	1	Not available	2750276	2660094	96.72	79	56416	Mono-FQs	gyrA: Asp94Ala	2.2.1	Beijing	ungrouped	S	S	S	S
IT3172	SRR29124310	2019	Lombardy	1	0	Not available	2827261	2684260	94.94	85	25093	Pan-S		4.1.2.1	Haarlem	ungrouped	S	S	S	S
IT3174	SRR29124272	2019	Lombardy	1	1	Not available	3488530	3385491	97.05	83	22921	Pan-S		3	Delhi-CAS	ungrouped	S	S	S	S
IT3176	SRR29124271	2019	Lombardy	0	0	Not available	8052836	3842054	47.71	87	31074	Pan-S		4.1.2.1	Haarlem	group_5	S	S	S	S
IT3177	SRR29124270	2019	Lombardy	0	0	Not available	3376171	3276830	97.06	102	27171	Pan-S		4.2.2	Euro-American	group_131	S	S	S	S
IT3178	SRR29124269	2019	Lombardy	1	0	Not available	3016021	2917964	96.75	85	32497	Pan-S		3.1.2	Delhi-CAS	group_21	S	S	S	S
IT3180	SRR29124268	2019	Lombardy	0	0	Not available	2495099	2422220	97.08	73	37628	Pan-S		4.1.2.1	Haarlem	group_73	S	S	S	S
IT3183	SRR29124267	2019	Lombardy	1	0	Not available	2637334	2559041	97.03	78	24970	Pan-S		3	Delhi-CAS	group_91	S	S	S	S
IT3184	SRR29124266	2019	Lombardy	0	0	Not available	3252907	3129849	96.22	96	28936	Pan-S		4.5	Euro-American	group_148	S	S	S	S
IT3185	SRR30861007	2019	Lombardy	1	0	Not available	2419821	2282411	94.32	71	21023	Pan-S		4.1.2	Euro-American	group_28	S	S	S	S
IT3187	SRR29124265	2019	Lombardy	1	1	Not available	3497009	3368276	96.32	102	23573	Other	rrs:1472337_C>T_SNP	4.3.2	LAM	group_37	S	S	S	S
IT3188	SRR29124263	2019	Lombardy	1	0	Not available	3144506	3055722	97.18	93	30269	Pan-S		4.3.3	LAM	group_237	S	S	S	S
IT3189	SRR29124262	2019	Lombardy	0	0	Not available	4059929	3884493	95.68	112	25889	Pan-S		4.1.2.1	Haarlem	group_83	S	S	S	S
IT3190	SRR29124261	2019	Lombardy	1	0	Not available	3361403	3191815	94.95	93	32086	Pan-S		4.3.1	LAM	group_47	S	S	S	S
IT3191	SRR30861006	2019	Lombardy	0	0	Not available	3249570	3135272	96.48	96	26053	Mono-INH	katG:Ser315Thr	4.3.3	LAM	group_251	R	S	S	S
IT3192	SRR29124309	2019	Lombardy	0	0	Not available	4571225	4231340	92.56	121	15575	Pan-S		4.1.2	Euro-American	ungrouped	S	S	S	S
IT3195	SRR29124307	2019	Lombardy	1	0	Not available	3258684	3112502	95.51	97	37352	Other	rpsL:Lys43Arg	2.2.1	Beijing	ungrouped	S	S	S	S
IT3196	SRR29124306	2019	Lombardy	1	0	Not available	3221857	3099043	96.19	97	28706	Pan-S		4.1.2.1	Haarlem	group_27	S	S	S	S
IT3197	SRR29124305	2019	Lombardy	0	1	Not available	2536059	2478474	97.73	80	22970	Pan-S		4.8	mainly T	group_13	S	S	S	S
IT3198	SRR29124304	2019	Lombardy	1	0	Not available	2799780	2697362	96.34	77	18748	Pan-S		1.2.1	EAI Manila	ungrouped	S	S	S	S
IT3200	SRR29124260	2019	Lombardy	1	0	Not available	2794575	2690483	96.28	80	26235	Pan-S		4.1.2.1	Haarlem	group_104	S	S	S	S
IT3201	SRR29124259	2019	Lombardy	1	1	Not available	1900016	1860890	97.94	58	29935	Pan-S		4.1.2.1	Haarlem	group_30	S	S	S	S
IT3202	SRR29124258	2019	Lombardy	1	0	Not available	1565679	1533890	97.97	47	26570	Pan-S		2.2.1	Beijing	group_212	S	S	S	S
IT3204	SRR31008817	2017	Emilia-Romagna	0	0	Not available	2829485	2703848	95.56	78	22041	Other	rpsL:Lys43Arg	4.1.2.1	Haarlem	ungrouped	S	S	S	S
IT3205	SRR31008816	2017	Emilia-Romagna	1	0	0	4876538	4704124	96.46	143	7115	Other	fabG1_ups:C-15T- 1673425 (73.2%)	4.4.1.1	S-type	ungrouped	R	S	S	S	R
IT3207	SRR31008815	2017	Emilia-Romagna	1	1	Not available	3889316	3665102	94.24	107	16069	Mono-INH	katG:Ser315Thr	4.1.2	Euro-American	ungrouped	R	S	S	S	R
IT3208	SRR31008814	2017	Emilia-Romagna	1	0	0	3212232	3053996	95.07	93	29354	Mono-Rif	rpoB:Leu430Pro	4.7	mainly T	ungrouped	S	R	S	S
IT3209	SRR31008813	2017	Emilia-Romagna	1	0	0	4264316	3887947	91.17	115	22191	pre_XDR	eis_ups:G-14A- 2715346, embA_ups:C-12T- 4243221, embB:Met306Ile, fabG1_ups:T-8C- 1673432, gyrA: Asp94Gly, katG:Ser315Thr, rpoB:Asp435Val	4.9	H37Rv-like	ungrouped	R	R	R	R	R
IT3210	SRR31008812	2017	Emilia-Romagna	1	0	Not available	3492811	3213250	92	94	24771	MDR	embB:Gly406Ala, katG:Ser315Thr, pncA:Thr76Pro, rpoB:Ser450Leu	4.2.2	Euro-American	group_216	R	R	S	R	R
IT3211	SRR31008811	2017	Emilia-Romagna	1	0	0	4319326	3772493	87.34	104	20022	Mono-INH	fabG1_ups:C-15T- 1673425	4.8	mainly T	ungrouped	R	S	S	S
IT3212	SRR31008810	2017	Emilia-Romagna	0	1	Not available	1223289	1166180	95.33	32	150827	Other	pncA:His57Asp	M. bovis	M. bovis	group_48	S	S	S	R
IT3213	SRR31008809	2018	Emilia-Romagna	1	1	1	6195017	5597996	90.36	163	54581	Pan-S		4.3.4.2	LAM	ungrouped	S	S	S	S
IT3214	SRR31008808	2017	Emilia-Romagna	0	1	0	1386163	1334998	96.31	34	84891	Other	pncA:His57Asp	M. bovis	M. bovis	ungrouped	S	S	S	R
IT3215	SRR31008806	2018	Emilia-Romagna	1	1	Not available	5459718	5140775	94.16	149	35791	Mono-INH	katG:Ser315Thr	2.2.1	Beijing	ungrouped	R	S	S	S	R
IT3216	SRR31008805	2018	Emilia-Romagna	0	1	1	2485407	2387307	96.05	71	44946	MDR	katG: Ser315Thr, pncA:Cys138Arg, rpoB: Leu430Pro, rpsL:Lys43Arg	2.2.1	Beijing	group_31	R	R	R	R	R
IT3217	SRR31008804	2018	Emilia-Romagna	1	1	1	4685437	4413796	94.2	134	40242	MDR	katG: Ser315Thr, pncA:Cys138Arg, rpoB: Leu430Pro, rpsL:Lys43Arg	2.2.1	Beijing	group_31	R	R	S	S
IT3218	SRR31008803	2018	Emilia-Romagna	0	1	0	1857985	1809531	97.39	44	20580	Pan-S		4.1.2.1	Haarlem	ungrouped	S	S	S	S
IT3219	SRR31008802	2018	Emilia-Romagna	1	0	0	3164121	2980041	94.18	91	32313	Pan-S		4.1.2.1	Haarlem	ungrouped	S	S	S	S
IT3221	SRR31008801	2019	Emilia-Romagna	0	0	1	2422577	2301412	95	71	56024	Mono-Rif	rpoB:His445Cys	4.8	mainly T	ungrouped	S	R	S	S
IT3222	SRR31008800	2019	Emilia-Romagna	0	1	0	4253593	3788525	89.07	108	124629	Other	pncA:His57Asp	M. bovis	M. bovis	group_23	S	S	S	R
IT3224	SRR31008799	2020	Emilia-Romagna	0	0	0	2706605	2495392	92.2	79	65533	Pan-S		4.1.2	Euro-American	ungrouped	S	S	S	S
IT3226	SRR31008798	2020	Emilia-Romagna	1	0	Not available	2655693	2480831	93.42	76	32165	Pan-S		4.1.2.1	Haarlem	ungrouped	S	S	S	S
IT3228	SRR31008797	2020	Emilia-Romagna	1	1	0	3449749	870119	25.22	25	21334	Pan-S		4.8	mainly T	ungrouped	S	S	S	S
IT3229	SRR31008471	2020	Emilia-Romagna	1	0	0	5871833	5166237	87.98	149	20360	Pan-S		4.1.2.1	Haarlem	ungrouped	S	S	S	S
IT3230	SRR31008470	2020	Emilia-Romagna	1	0	0	2976272	2863515	96.21	91	37796	Pan-S		4.1.2.1	Haarlem	ungrouped	S	S	S	S
IT3232	SRR31008469	2020	Emilia-Romagna	1	0	0	5016898	4511661	89.93	128	19701	Pan-S		4.1.2.1	Haarlem	ungrouped	S	S	S	S
IT3233	SRR31008468	2020	Emilia-Romagna	1	1	Not available	3936127	3600163	91.46	111	35352	Pan-S		2.2.1	Beijing	ungrouped	S	S	S	S
IT3234	SRR31008467	2020	Emilia-Romagna	0	1	1	3048952	2902512	95.2	86	54618	Pan-S		4.3.4.2	LAM	ungrouped	S	S	S	S
IT3235	SRR31008466	2020	Emilia-Romagna	0	0	Not available	3456170	3305323	95.64	104	23214	Pan-S		4.7	mainly T	ungrouped	S	S	S	S
IT3236	SRR31008465	2020	Emilia-Romagna	1	1	0	4091282	3870880	94.61	117	44924	Pan-S		4.6.2.2	Cameroon	group_231	S	S	S	S
IT3239	SRR31008464	2020	Emilia-Romagna	1	0	0	3731021	3604589	96.61	111	20375	Pan-S		3	Delhi-CAS	ungrouped	S	S	S	S
IT3241	SRR31008463	2020	Emilia-Romagna	0	1	Not available	2083904	2004919	96.21	62	25533	Pan-S		4.8	mainly T	ungrouped	S	S	S	S
IT3242	SRR31008462	2020	Emilia-Romagna	0	0	Not available	2835105	2681347	94.58	81	19134	Pan-S		1.2.2	EAI	ungrouped	S	S	S	S
IT3243	SRR31008460	2020	Emilia-Romagna	1	1	0	4949022	4623242	93.42	143	17419	Other	rrs:1472337_C>T_SNP	4.3.2	LAM	group_198	S	S	S	S
IT3244	SRR31008459	2020	Emilia-Romagna	0	0	Not available	4133467	3958578	95.77	124	22398	Pan-S		4.8	mainly T	ungrouped	S	S	S	S
IT3245	SRR31008458	2020	Emilia-Romagna	0	1	Not available	4643347	4407726	94.93	136	33325	Pan-S		2.2.1	Beijing	ungrouped	S	S	S	S
IT3246	SRR31008457	2020	Emilia-Romagna	0	1	0	5239658	4917912	93.86	148	28237	Pan-S		4.1.2.1	Haarlem	ungrouped	S	S	S	S
IT3248	SRR31008456	2020	Emilia-Romagna	0	0	0	4986257	4641041	93.08	136	15507	Pan-S		4.8	mainly T	ungrouped	S	S	S	S
IT3249	SRR31008455	2020	Emilia-Romagna	1	0	Not available	3811829	3630386	95.24	108	23382	Pan-S		4.1.2.1	Haarlem	ungrouped	S	S	S	S
IT3251	SRR31008454	2020	Emilia-Romagna	1	0	0	1485442	1424128	95.87	42	21986	Pan-S		4.1.2	Euro-American	group_220	S	S	S	S
IT3252	SRR31008453	2020	Emilia-Romagna	0	1	Not available	3116822	2997839	96.18	91	21583	Pan-S		4.8	mainly T	ungrouped	S	S	S	S
IT3253	SRR31008452	2020	Emilia-Romagna	1	1	0	4247002	3812546	89.77	111	17245	Pan-S		1.2.2	EAI	ungrouped	S	S	S	S
IT3254	SRR31008451	2020	Emilia-Romagna	0	1	0	3010489	2481246	82.42	78	77878	Poly-resistant	pncA:His57Asp, rpsL:Lys43Arg	M. bovis	M. bovis	ungrouped	S	S	S	R
IT3255	SRR31008449	2020	Emilia-Romagna	0	1	Not available	3763412	3481197	92.5	98	28201	Pan-S		4.4.1.1	S-type	ungrouped	S	S	S	S
IT3256	SRR31008448	2020	Emilia-Romagna	1	1	Not available	2543268	2473865	97.27	77	24723	Pan-S		4.8	mainly T	ungrouped	S	S	S	S
IT3257	SRR31008447	2020	Emilia-Romagna	0	0	Not available	3410121	3214279	94.26	92	29246	Pan-S		4.1.2.1	Haarlem	ungrouped	S	S	S	S
IT3258	SRR31008446	2020	Emilia-Romagna	0	0	0	2105728	2065739	98.1	63	25776	Pan-S		4.1.1.1	X-type	group_262	S	S	S	S
IT3259	SRR31008445	2020	Emilia-Romagna	0	0	Not available	3471207	3425285	98.68	104	13335	Pan-S		4.1.2	Euro-American	ungrouped	S	S	S	S
IT3260	SRR31008444	2020	Emilia-Romagna	0	1	1	2824554	2786495	98.65	86	21952	Other	rrs:1472337_C>T_SNP	4.3.2	LAM	ungrouped	S	S	S	S
IT3262	SRR31008442	2020	Emilia-Romagna	0	0	0	1288888	1270407	98.57	40	43923	MDR	embA_ups:C-12T- 4243221, embB:Tyr334His, fabG1_ups:C-15T- 1673425, katG: Ser315Thr, rpoB:Ser450Leu, rpsL:Lys88Arg	2.2.1	Beijing	ungrouped	R	R	S	S	R
IT3263	SRR31008441	2020	Emilia-Romagna	1	1	0	834179	821517	98.48	25	34139	Pan-S		4.1.2.1	Haarlem	ungrouped	S	S	S	S
IT3264	SRR31008440	2020	Emilia-Romagna	0	1	0	2039587	2013524	98.72	64	55247	Pan-S		4.6.2.2	Cameroon	ungrouped	S	S	S	S
IT3265	SRR31008438	2020	Emilia-Romagna	1	1	0	1427851	1404439	98.36	44	48186	Pan-S		4.6.2.2	Cameroon	ungrouped	S	S	S	S
IT3266	SRR31008437	2020	Emilia-Romagna	0	0	0	2936468	2892818	98.51	87	53459	Pan-S		4.3.4.2	LAM	group_185	S	S	S	S
IT3267	SRR31008436	2020	Emilia-Romagna	0	1	Not available	2535397	2499340	98.58	76	25071	Pan-S		4.7	mainly T	ungrouped	S	S	S	S
IT3268	SRR31008615	2020	Emilia-Romagna	1	1	0	923874	908563	98.34	28	39825	Pan-S		4.3.1	LAM	group_214	S	S	S	S
IT3269	SRR31008614	2020	Emilia-Romagna	0	1	Not available	2873296	2831670	98.55	91	117339	Other	pncA:His57Asp	M. bovis	M. bovis	group_23	S	S	S	R
IT3271	SRR31008613	2020	Emilia-Romagna	1	0	0	1654502	1628727	98.44	53	33712	Pan-S		4.1.1.1	X-type	group_262	S	S	S	S
IT3273	SRR31008612	2020	Emilia-Romagna	0	0	Not available	1422376	1402779	98.62	44	21592	Pan-S		4.8	mainly T	ungrouped	S	S	S	S
IT3274	SRR31008611	2020	Emilia-Romagna	0	0	0	1502431	1480114	98.51	46	32640	Pan-S		4.3	LAM	ungrouped	S	S	S	S
IT3276	SRR31008610	2020	Emilia-Romagna	1	1	Not available	2550718	2357685	92.43	69	24583	Pan-S		4.6.2	Euro-American	group_139	S	S	S	S
IT3277	SRR31008609	2020	Emilia-Romagna	1	1	Not available	2739461	2684733	98	82	19504	Pan-S		3	Delhi-CAS	ungrouped	S	S	S	S
IT3279	SRR31008606	2020	Emilia-Romagna	1	0	Not available	1365301	1341848	98.28	41	18160	Pan-S		4.8	mainly T	ungrouped	S	S	S	S
IT3280	SRR31008605	2020	Emilia-Romagna	1	0	0	2100000	2061934	98.19	64	23075	Pan-S		4.1.2.1	Haarlem	ungrouped	S	S	S	S
IT3281	SRR31008604	2020	Emilia-Romagna	0	0	0	1840368	1814848	98.61	56	54723	Pan-S		4.3.4.2	LAM	ungrouped	S	S	S	S
IT3282	SRR31008603	2020	Emilia-Romagna	1	1	0	3403952	3346467	98.31	102	9640	Pan-S		3	Delhi-CAS	ungrouped	S	S	S	S
IT3283	SRR31008602	2020	Emilia-Romagna	1	1	0	3114749	3062707	98.33	97	19027	Pan-S		4.8	mainly T	ungrouped	S	S	S	S
IT3284	SRR31008601	2020	Emilia-Romagna	1	1	0	2032757	1995339	98.16	63	59575	Pan-S		6	West-Africa 2	ungrouped	S	S	S	S
IT3285	SRR31008600	2020	Emilia-Romagna	0	0	Not available	3016440	2967820	98.39	95	10613	Pan-S		4.8	mainly T	ungrouped	S	S	S	S
IT3286	SRR31008599	2020	Emilia-Romagna	0	0	Not available	2250813	2200548	97.77	66	29205	Pan-S		4.4.1.1	S-type	ungrouped	S	S	S	S
IT3287	SRR31008598	2020	Emilia-Romagna	1	0	0	2042110	2002646	98.07	62	19151	Other	rpsL:Lys43Arg	3	Delhi-CAS	ungrouped	S	S	S	S
IT3288	SRR31008597	2020	Emilia-Romagna	1	1	0	1684407	1660094	98.56	46	54332	Pan-S		4.6.2.2	Cameroon	group_231	S	S	S	S
IT3289	SRR31008595	2020	Emilia-Romagna	1	0	0	3049927	3005785	98.55	77	33350	Pan-S		4.3.3	LAM	ungrouped	S	S	S	S
IT3308	SRR31008594	2017	Emilia-Romagna	1	0	0	3845662	3519894	91.53	100	48683	Pan-S		4.6.2.2	Cameroon	ungrouped	S	S	S	S
IT3312	SRR31008593	2017	Emilia-Romagna	1	0	0	1424848	1403230	98.48	41	50022	Pan-S		4.6.2.2	Cameroon	group_54	S	S	S	S
IT3313	SRR31008592	2017	Emilia-Romagna	0	0	0	936814	922429	98.46	28	19133	Pan-S		4	Euro-American	ungrouped	S	S	S	S
IT3315	SRR31008591	2017	Emilia-Romagna	0	0	0	2216013	2169425	97.9	44	25553	Pan-S		4.7	mainly T	ungrouped	S	S	S	S
IT3319	SRR31008590	2017	Emilia-Romagna	1	0	0	2406099	2373489	98.64	67	54763	Pan-S		4.6.2.2	Cameroon	ungrouped	S	S	S	S
IT3320	SRR31008589	2017	Emilia-Romagna	0	0	0	904112	890513	98.5	27	32103	Pan-S		4.7	mainly T	group_236	S	S	S
IT3321	SRR31008588	2017	Emilia-Romagna	0	0	0	2234124	2184592	97.78	66	28397	Pan-S		4.3.3	LAM	ungrouped	S	S	S
IT3323	SRR31008587	2017	Emilia-Romagna	0	0	0	2973065	2899864	97.54	86	7140	Pan-S		4.8	mainly T	ungrouped	S	S	S	S
IT3327	SRR31008586	2017	Emilia-Romagna	0	0	0	2436595	2393993	98.25	73	28077	Pan-S		1.1.3	EAI	ungrouped	S	S	S	S
IT3328	SRR31008584	2017	Emilia-Romagna	0	0	1	1182039	1162312	98.33	35	22284	Pan-S		4.1	Euro-American	ungrouped	S	S	S	S
IT3335	SRR31008583	2017	Emilia-Romagna	0	0	0	2957835	2888903	97.67	85	53206	Pan-S		4.3.4.2	LAM	group_74	S	S	S	S
IT3338	SRR31008582	2017	Emilia-Romagna	0	0	0	2901717	2861765	98.62	70	14526	Other	rpsL:Lys43Arg	4.9	H37Rv-like	ungrouped	S	S	S	S
IT3344	SRR31008581	2018	Emilia-Romagna	1	0	0	2333517	2275963	97.53	66	15292	Pan-S		4.1.2	Euro-American	ungrouped	S	S	S	S
IT3345	SRR31008580	2018	Emilia-Romagna	0	0	0	1800553	1776982	98.69	55	56360	Pan-S		4.3.4.2	LAM	group_74	S	S	S	S
IT3346	SRR31008903	2018	Emilia-Romagna	0	0	0	2533848	2494003	98.43	80	78153	Other	pncA:His57Asp	M. bovis	M. bovis	ungrouped	S	S	S	R
IT3347	SRR31008902	2018	Emilia-Romagna	1	0	0	1023124	1001209	97.86	29	22089	Pan-S		3.1.1	Delhi-CAS	ungrouped	S	S	S	S
IT3348	SRR31008901	2018	Emilia-Romagna	1	0	0	3638646	3563967	97.95	103	2535	Pan-S		4.9	H37Rv-like	ungrouped	S	S	S
IT3350	SRR31008900	2018	Emilia-Romagna	1	0	0	2242281	2204354	98.31	70	31128	Pan-S		4.1.2.1	Haarlem	group_224	S	S	S	S
IT3351	SRR31008899	2018	Emilia-Romagna	1	0	0	1503587	1364870	90.77	35	15632	Pan-S		3	Delhi-CAS	ungrouped	S	S	S	S
IT3352	SRR31008897	2018	Emilia-Romagna	1	0	0	2520096	2445714	97.05	65	13845	Pan-S		4.3.1	LAM	ungrouped	S	S	S	S
IT3355	SRR31008896	2018	Emilia-Romagna	1	0	0	2428631	2395904	98.65	75	17677	Pan-S		4.8	mainly T	ungrouped	S	S	S	S
IT3357	SRR31008895	2018	Emilia-Romagna	1	0	0	1413495	1361231	96.3	43	20774	Pan-S		4.6	Euro-American	ungrouped	S	S	S	S
IT3358	SRR31008894	2018	Emilia-Romagna	1	0	0	3179712	2955666	92.95	93	21150	Pan-S		4.8	mainly T	group_249	S	S	S	S
IT3359	SRR31008893	2018	Emilia-Romagna	1	0	0	1578691	1550481	98.21	47	44858	Pan-S		4.6.2.2	Cameroon	group_117	S	S	S	S
IT3362	SRR31008892	2018	Emilia-Romagna	0	0	0	6206912	6042895	97.36	164	15501	Pan-S		4.1.2.1	Haarlem	ungrouped	S	S	S	S
IT3363	SRR31008891	2018	Emilia-Romagna	1	0	0	3385142	3335395	98.53	104	50630	Pan-S		4.6.2.2	Cameroon	group_117	S	S	S	S
IT3364	SRR31008890	2018	Emilia-Romagna	1	0	0	3119060	1741578	55.84	52	13371	Pan-S		4.5	Euro-American	group_90	S	S	S	S
IT3365	SRR31008889	2018	Emilia-Romagna	0	0	0	3046636	2995796	98.33	92	34224	Mono-INH	katG:Ser315Thr	2.2.1	Beijing	ungrouped	R	S	S	S
IT3366	SRR31008888	2018	Emilia-Romagna	1	0	0	2819594	2766139	98.1	86	20840	Pan-S		1.1.2	EAI	ungrouped	S	S	S	S
IT3367	SRR31008886	2018	Emilia-Romagna	1	0	0	3329329	3280772	98.54	105	15429	Mono-INH	katG:Ser315Thr	4	Euro-American	ungrouped	R	S	S
IT3368	SRR31008885	2018	Emilia-Romagna	1	0	0	2074663	2042663	98.46	54	16029	Pan-S		4.8	mainly T	ungrouped	S	S	S	S
IT3369	SRR31008884	2018	Emilia-Romagna	0	0	0	5126873	5055418	98.61	158	10123	Pan-S		4.8	mainly T	ungrouped	S	S	S
IT3370	SRR31008883	2018	Emilia-Romagna	0	0	0	3716239	3654505	98.34	108	31838	Pan-S		4.4.1.1	S-type	ungrouped	S	S	S	S
IT3371	SRR31008882	2018	Emilia-Romagna	1	0	0	5759521	3790117	65.81	101	31843	Pan-S		2.2.1	Beijing	ungrouped	S	S	S
IT3372	SRR31008881	2018	Emilia-Romagna	0	0	0	4229167	4178668	98.81	133	25890	Pan-S		4.4.1.1	S-type	ungrouped	S	S	S	S
IT3373	SRR31008880	2018	Emilia-Romagna	1	0	0	1329679	1269798	95.5	27	33976	MDR	katG: Ser315Thr, rpoB:Ser450Leu, rpsL:Lys43Arg	2.2.1	Beijing	group_260	R	R	S	R
IT3374	SRR31008879	2018	Emilia-Romagna	1	0	0	1645509	1620013	98.45	50	25405	Pan-S		4.7	mainly T	ungrouped	S	S	S	S
IT3376	SRR31008878	2018	Emilia-Romagna	1	0	0	1259654	1229695	97.62	38	29272	Pan-S		4.1.2.1	Haarlem	ungrouped	S	S	S
IT3378	SRR31008877	2018	Emilia-Romagna	0	0	0	2612778	2577490	98.65	82	33259	Pan-S		4.3.3	LAM	ungrouped	S	S	S	S
IT3379	SRR31008875	2018	Emilia-Romagna	1	0	0	2094815	2068514	98.74	65	22324	Pan-S		4.8	mainly T	ungrouped	S	S	S
IT3380	SRR31008874	2018	Emilia-Romagna	1	0	0	1797392	1769462	98.45	55	37983	Pan-S		2.2.1	Beijing	group_51	S	S	S	S
IT3382	SRR31008873	2018	Emilia-Romagna	1	0	0	839370	827219	98.55	26	29239	Mono-INH	katG:Ser315Thr	4.3.1	LAM	ungrouped	R	S	S	S
IT3383	SRR31008872	2018	Emilia-Romagna	0	1	0	1979231	1950020	98.52	61	36503	Pan-S		2.2.1	Beijing	group_51	S	S	S	S
IT3384	SRR31008871	2018	Emilia-Romagna	1	0	0	2560746	2516661	98.28	73	39062	MDR	embB:His1002Arg, katG: Ser315Thr, rpoB:Ser450Leu, rpsL:Lys43Arg, rrs:1473246_A>G_SNP	2.2.1	Beijing	ungrouped	R	R	R	S
IT3385	SRR31008870	2018	Emilia-Romagna	0	0	0	2487188	2456893	98.78	76	21290	Other	gid:Ala138Val	4.4.1.1	S-type	ungrouped	S	S	S	S
IT3386	SRR31008869	2018	Emilia-Romagna	1	0	0	891966	878398	98.48	27	36115	Pan-S		4.1.2.1	Haarlem	ungrouped	S	S	S	S
IT3387	SRR31008868	2018	Emilia-Romagna	1	0	0	1407499	1387314	98.57	43	25372	Pan-S		4.1.2.1	Haarlem	group_182	S	S	S	S
IT3388	SRR31008795	2018	Emilia-Romagna	0	0	0	2645481	2608594	98.61	82	25121	Pan-S		4.1.2	Euro-American	ungrouped	S	S	S	S
IT3390	SRR31008794	2019	Emilia-Romagna	0	0	0	2022308	1990141	98.41	63	78739	Other	pncA:His57Asp	M. bovis	M. bovis	ungrouped	S	S	S
IT3391	SRR31008792	2019	Emilia-Romagna	1	0	0	2671314	2635304	98.65	83	16184	Pan-S		4.8	mainly T	ungrouped	S	S	S
IT3392	SRR31008791	2019	Emilia-Romagna	0	0	0	2216736	2186759	98.65	68	48223	Pan-S		4.3.4.1	LAM	ungrouped	S	S	S	S
IT3393	SRR31008790	2019	Emilia-Romagna	0	0	0	2698763	2568708	95.18	60	24962	Pan-S		4.4.1.1	S-type	ungrouped	S	S	S	S
IT3394	SRR31008789	2019	Emilia-Romagna	1	0	0	670472	658284	98.18	20	69567	Pan-S		6	West-Africa 2	ungrouped	S	S	S
IT3395	SRR31008788	2019	Emilia-Romagna	1	0	0	1705155	1674852	98.22	52	31921	Pan-S		1.2.1	EAI Manila	ungrouped	S	S	S
IT3396	SRR31008787	2019	Emilia-Romagna	1	0	0	2704436	2635229	97.44	73	17484	Pan-S		4.3.1	LAM	ungrouped	S	S	S	S
IT3397	SRR31008786	2019	Emilia-Romagna	1	0	0	2786227	2747804	98.62	88	17208	Pan-S		4.5	Euro-American	ungrouped	S	S	S	S
IT3398	SRR31008785	2019	Emilia-Romagna	1	0	0	1917445	1883262	98.22	59	23368	Pan-S		4.1.2.1	Haarlem	ungrouped	S	S	S
IT3399	SRR31008784	2019	Emilia-Romagna	0	0	0	1180159	1160369	98.32	35	34550	MDR	katG: Ser315Thr, rpoB:Ser450Leu, rpsL:Lys43Arg	2.2.1	Beijing	group_260	R	R	S	R
IT3400	SRR31008783	2019	Emilia-Romagna	1	0	0	7413750	7261271	97.94	215	33630	Pan-S		4.4.1.1	S-type	ungrouped	S	S	S	S
IT3401	SRR31008781	2019	Emilia-Romagna	0	0	0	961865	945602	98.31	28	26904	Pan-S		4.4.1.1	S-type	ungrouped	S	S	S	S
IT3402	SRR31008780	2019	Emilia-Romagna	1	0	0	950911	929251	97.72	27	56998	Pan-S		6	West-Africa 2	ungrouped	S	S	S	S
IT3404	SRR31008779	2019	Emilia-Romagna	0	0	0	2086195	2053112	98.41	62	28887	Other	rpsL:Lys43Arg	4.3.3	LAM	ungrouped	S	S	S	S
IT3407	SRR31008778	2019	Emilia-Romagna	0	0	0	1181438	1160775	98.25	34	24740	Pan-S		4.3.3	LAM	ungrouped	S	S	S	S
IT3408	SRR31008777	2019	Emilia-Romagna	0	0	0	2423751	2364887	97.57	60	16616	Pan-S		4.1.2.1	Haarlem	ungrouped	S	S	S	S
IT3409	SRR31008776	2019	Emilia-Romagna	1	0	0	1597847	1570538	98.29	47	26920	Pan-S		4.7	mainly T	group_168	S	S	S	S
IT3410	SRR31008775	2019	Emilia-Romagna	1	0	0	1954064	1922436	98.38	61	29855	Pan-S		4.1.2.1	Haarlem	ungrouped	S	S	S	S
IT3413	SRR31008773	2019	Emilia-Romagna	1	0	0	1113932	1096761	98.46	32	23023	Pan-S		3	Delhi-CAS	ungrouped	S	S	S	S
IT3415	SRR31008772	2019	Emilia-Romagna	0	0	0	1823838	1791586	98.23	46	53988	Mono-FQs	gyrA:Asp94His	4.3.4.2	LAM	ungrouped	S	S	S	S
IT3417	SRR31008769	2019	Emilia-Romagna	1	0	0	2796474	2754365	98.49	83	13586	Pan-S		3	Delhi-CAS	ungrouped	S	S	S	S
IT3419	SRR31008768	2019	Emilia-Romagna	1	0	0	1488380	1455743	97.81	39	11565	Pan-S		4.8	mainly T	group_72	S	S	S	S
IT3421	SRR31008766	2019	Emilia-Romagna	1	0	0	1385427	1363357	98.41	42	39251	Poly-resistant	katG: Ser315Thr, rpsL:Lys43Arg	2.2.1	Beijing	ungrouped	R	S	S	R
IT3422	SRR31008765	2019	Emilia-Romagna	1	0	0	1630799	1568019	96.15	44	23252	Pan-S		4.8	mainly T	ungrouped	S	S	S	S
IT3423	SRR31008764	2019	Emilia-Romagna	1	0	0	1849443	1482563	80.16	39	23806	Poly-resistant	katG:Ser315Ile , rpsL:Lys88Arg	4.3.3	LAM	ungrouped	R	S	S	S
IT3424	SRR31008763	2019	Emilia-Romagna	0	0	0	1286250	1087797	84.57	28	25523	Pan-S		4.3.3	LAM	ungrouped	S	S	S	S
IT3425	SRR31008762	2020	Emilia-Romagna	Not available	0	0	3114780	3052042	97.99	66	19657	Pan-S		4.1.2.1	Haarlem	ungrouped	S	S	S	S
IT3426	SRR31008761	2020	Emilia-Romagna	Not available	0	0	3084266	3036011	98.44	98	22038	Pan-S		1.2.1	EAI Manila	ungrouped	S	S	S	S
IT3427	SRR31008435	2020	Emilia-Romagna	Not available	0	0	3445973	3381217	98.12	98	15866	Pan-S		4.7	mainly T	ungrouped	S	S	S	S
IT3428	SRR31008434	2020	Emilia-Romagna	Not available	0	0	880056	862353	97.99	25	27038	Pan-S		3	Delhi-CAS	ungrouped	S	S	S	S
IT3429	SRR31008433	2020	Emilia-Romagna	Not available	0	0	1963290	1936104	98.62	61	18580	Mono-INH	fabG1_ups:C-15T- 1673425	3	Delhi-CAS	group_146	R	S	S	S
IT3430	SRR31008432	2020	Emilia-Romagna	Not available	0	0	1502997	1478988	98.4	47	22737	Pan-S		4.2.1	Ural	ungrouped	S	S	S	S
IT3431	SRR31008431	2020	Emilia-Romagna	Not available	0	0	3517776	3457598	98.29	113	32211	Pan-S		1.1.2	EAI	ungrouped	S	S	S
IT3432	SRR31008430	2020	Emilia-Romagna	Not available	0	0	3760468	3665831	97.48	102	54205	Pan-S		4.3.4.2	LAM	group_241	S	S	S
IT3433	SRR31008429	2020	Emilia-Romagna	Not available	0	0	3006347	2961045	98.49	95	39727	Pan-S		4.1.2.1	Haarlem	ungrouped	S	S	S	S
IT3434	SRR31008428	2020	Emilia-Romagna	Not available	0	0	3168073	3126063	98.67	100	30747	Pan-S		4.3.3	LAM	ungrouped	S	S	S	S
IT3435	SRR31008427	2020	Emilia-Romagna	Not available	0	0	3377012	3268725	96.79	84	8903	Pan-S		3	Delhi-CAS	ungrouped	S	S	S
IT3436	SRR31008426	2020	Emilia-Romagna	Not available	0	0	2280363	2162239	94.82	47	11411	Pan-S		4.8	mainly T	group_72	S	S	S	S
IT3437	SRR31008423	2020	Emilia-Romagna	Not available	0	0	1897325	1872093	98.67	60	21970	Pan-S		4.3.1	LAM	group_22	S	S	S
IT3438	SRR31008422	2020	Emilia-Romagna	Not available	0	0	3770522	3703160	98.21	111	78262	Pan-S		M. caprae	M. caprae	ungrouped	S	S	S
IT3439	SRR31008421	2020	Emilia-Romagna	Not available	0	0	3192650	3151982	98.73	101	41151	Mono-FQs	gyrA: Asp94Gly	2.2.1	Beijing	ungrouped	S	S	S
IT3440	SRR31008420	2020	Emilia-Romagna	Not available	0	0	2370934	2338311	98.62	72	19477	Pan-S		3	Delhi-CAS	ungrouped	S	S	S	S
IT3442	SRR31008419	2020	Emilia-Romagna	Not available	0	0	2375566	2310173	97.25	73	29361	Pan-S		4.3.3	LAM	ungrouped	S	S	S	S
IT3443	SRR31008418	2020	Emilia-Romagna	Not available	0	0	2540381	2506113	98.65	80	15686	Pan-S		4.5	Euro-American	group_90	S	S	S	S
IT3444	SRR31008417	2020	Emilia-Romagna	Not available	0	0	1648343	1580434	95.88	49	54335	Other	rpsL:Lys43Arg	4.6.2.2	Cameroon	group_188	S	S	S	S
IT3445	SRR31008416	2020	Emilia-Romagna	Not available	1	0	1417503	1376454	97.1	40	34364	Pan-S		4.1.2.1	Haarlem	ungrouped	S	S	S	S
IT3446	SRR31008415	2020	Emilia-Romagna	Not available	1	0	3491328	3152772	90.3	88	32158	Pan-S		4.3.3	LAM	ungrouped	S	S	S	S
IT3447	SRR31008414	2020	Emilia-Romagna	Not available	0	0	1629014	1510821	92.74	45	57779	Pan-S		4.6.2.2	Cameroon	ungrouped	S	S	S	S
IT3448	SRR31008412	2020	Emilia-Romagna	Not available	0	0	2769051	2297814	82.98	64	25990	Pan-S		4.3.1	LAM	ungrouped	S	S	S	S
IT3449	SRR31008411	2020	Emilia-Romagna	Not available	0	0	5370648	4091686	76.19	108	12344	Pan-S		3	Delhi-CAS	ungrouped	S	S	S	S
IT3450	SRR31008410	2020	Emilia-Romagna	Not available	1	0	5886762	5330809	90.56	147	83778	Other	pncA:His57Asp	M. bovis	M. bovis	ungrouped	S	S	S
IT3451	SRR31008409	2020	Emilia-Romagna	Not available	1	0	6823350	4508483	66.07	113	16713	Mono-INH	fabG1_ups:C-15T- 1673425	3	Delhi-CAS	group_146	R	S	S	S
IT3452	SRR31008408	2020	Emilia-Romagna	Not available	0	0	3611264	3505469	97.07	110	61500	Pan-S		4.1.2.1	Haarlem	ungrouped	S	S	S
IT3453	SRR31008407	2020	Emilia-Romagna	Not available	0	0	1390066	1275469	91.76	33	19956	Pan-S		4.8	mainly T	ungrouped	S	S	S	S
IT3454	SRR31008406	2020	Emilia-Romagna	Not available	0	0	4036635	3721366	92.19	110	22949	Pan-S		4.7	mainly T	ungrouped	S	S	S	S
IT3456	SRR31008405	2020	Emilia-Romagna	Not available	0	0	3384603	3301349	97.54	90	27483	Pan-S		4.1.2.1	Haarlem	ungrouped	S	S	S	S
IT3457	SRR31008404	2020	Emilia-Romagna	Not available	0	0	3254350	3104567	95.4	87	27850	Pan-S		4.6.2	Euro-American	group_139	S	S	S	S
IT3458	SRR31008403	2020	Emilia-Romagna	Not available	0	0	3893584	3137444	80.58	91	41997	Pan-S		2.2.1	Beijing	ungrouped	S	S	R	S
IT3459	SRR31008401	2020	Emilia-Romagna	Not available	0	0	4060434	3238388	79.75	89	11802	Pan-S		3	Delhi-CAS	ungrouped	S	S	S	S
IT3460	SRR31008400	2020	Emilia-Romagna	Not available	0	0	1710058	1684361	98.5	50	14459	Pan-S		4.8	mainly T	ungrouped	S	S	S	S
IT3480	SRR31008579	2017	Piedmont	1	0	Not available	3407191	3360710	98.64	106	17740	Pan-S		3.1.1	Delhi-CAS	ungrouped	S	S	S	S
IT3481	SRR31008578	2018	Piedmont	1	Not available	0	1017332	1002681	98.56	30	56158	Pan-S		4.6.2.2	Cameroon	group_52	S	S	S	S
IT3482	SRR31008577	2018	Piedmont	0	Not available	0	4358038	4052353	92.99	112	12135	Pan-S		4.8	mainly T	group_264	S	S	S	S
IT3483	SRR31008576	2018	Piedmont	1	Not available	0	2761371	2725455	98.7	87	26168	Pan-S		4.8	mainly T	group_200	S	S	S	S
IT3484	SRR31008575	2018	Piedmont	0	Not available	Not available	2587184	2552517	98.66	76	18380	Pan-S		4.8	mainly T	ungrouped	S	S	S	S
IT3485	SRR31008574	2018	Piedmont	1	Not available	0	1842187	1811264	98.32	56	22259	Other	rrs:1472337_C>T_SNP	4.3.2	LAM	group_198	S	S	S	S
IT3486	SRR31008573	2018	Piedmont	1	Not available	0	2268856	2238757	98.67	70	52007	Pan-S		4.6.2.2	Cameroon	group_52	S	S	S	S
IT3487	SRR31008572	2018	Piedmont	1	Not available	Not available	3842652	3781027	98.4	100	24080	Pan-S		4.1.2.1	Haarlem	group_70	S	S	S	S
IT3488	SRR31008570	2018	Piedmont	1	Not available	0	2967338	2916347	98.28	72	26980	Pan-S		4.1.2.1	Haarlem	group_224	S	S	S	S
IT3489	SRR31008569	2019	Piedmont	1	Not available	0	4625247	4557483	98.53	135	49953	Pan-S		4.3.4.2	LAM	ungrouped	S	S	S	S
IT3490	SRR31008568	2019	Piedmont	1	Not available	Not available	3853504	3791667	98.4	121	54909	Pan-S		6	West-Africa 2	ungrouped	S	S	S	S
IT3491	SRR31008567	2019	Piedmont	1	Not available	0	4158342	4090738	98.37	126	11861	Pan-S		4.8	mainly T	group_122	S	S	S	S
IT3492	SRR31008566	2019	Piedmont	0	Not available	0	4250265	4195783	98.72	130	33525	Pan-S		2.2.1	Beijing	ungrouped	S	S	S	S
IT3493	SRR31008565	2019	Piedmont	0	Not available	0	4811128	4741156	98.55	143	30652	Pan-S		4.1.2.1	Haarlem	ungrouped	S	S	S	S
IT3494	SRR31008564	2019	Piedmont	0	Not available	Not available	2704166	2661686	98.43	81	27079	Pan-S		4.4.1.1	S-type	ungrouped	S	S	S	S
IT3496	SRR31008563	2019	Piedmont	1	Not available	0	5614563	5332940	94.98	161	29905	Pan-S		4.1.2.1	Haarlem	ungrouped	S	S	S	S
IT3497	SRR31008562	2019	Piedmont	1	Not available	Not available	5548602	5377298	96.91	157	37852	Mono-INH	fabG1_ups:C-15T- 1673425	4.8	mainly T	ungrouped	R	S	S	S		S	S	R	S
IT3498	SRR31008561	2019	Piedmont	0	Not available	Not available	5763402	5612109	97.37	170	21430	Pan-S		4.1.2.1	Haarlem	ungrouped	S	S	S	S
IT3499	SRR31008559	2019	Piedmont	1	Not available	0	5834293	5600739	96	173	28109	Pan-S		4.8	mainly T	ungrouped	S	S	S	S
IT3500	SRR31008558	2019	Piedmont	1	Not available	0	3593047	3491703	97.18	108	35654	pre_XDR	embB:Met306Val, gyrA: Asp94Gly , katG: Ser315Thr, pncA:Leu27Pro, rpoB:Ser450Leu, rpsL:Lys43Arg	2.2.1	Beijing	ungrouped	R	R	R	R		S	R	S	S
IT3501	SRR31008557	2019	Piedmont	0	Not available	0	4888180	3665825	74.99	114	18482	Mono-INH	fabG1_ups:C-15T- 1673425	4.1.1.3	X-type	ungrouped	R	S	S	S		S	S	S	S
IT3502	SRR31008556	2019	Piedmont	1	Not available	0	4903387	4664703	95.13	141	17345	Pan-S		4.1.2.1	Haarlem	group_213	S	S	S	S
IT3503	SRR31008555	2019	Piedmont	1	Not available	0	2828820	2563061	90.61	77	20805	Mono-INH	fabG1_ups:C-15T- 1673425	4.8	mainly T	ungrouped	R	S	S	S		S	S	R	S
IT3504	SRR31008554	2019	Piedmont	1	Not available	0	3956469	3817045	96.48	114	24929	Pan-S		4.8	mainly T	group_200	S	S	S	S
IT3505	SRR31008553	2019	Piedmont	1	Not available	0	5406234	5138859	95.05	160	18546	Pan-S		4.4.1.1	S-type	group_175	S	S	S	S
IT3506	SRR31008552	2019	Piedmont	0	Not available	0	4808406	4666574	97.05	130	18905	Pan-S		4.1.2.1	Haarlem	ungrouped	S	S	S	S
IT3507	SRR31008551	2019	Piedmont	1	Not available	0	4480643	4385096	97.87	133	30614	Pan-S		4.6	Euro-American	ungrouped	S	S	S	S
IT3508	SRR31008550	2019	Piedmont	1	Not available	Not available	5734770	5620895	98.01	171	28904	Pan-S		4.4.1.1	S-type	ungrouped	S	S	S	S
IT3510	SRR31008548	2019	Piedmont	1	Not available	1	5984034	5829706	97.42	174	21333	Pan-S		4.1.2.1	Haarlem	ungrouped	S	S	S	S
IT3512	SRR31008547	2019	Piedmont	0	Not available	0	3312092	3184438	96.15	97	17557	Pan-S		4.1.2.1	Haarlem	group_213	S	S	S	S
IT3513	SRR31008546	2019	Piedmont	1	Not available	0	5342429	5207103	97.47	159	14165	Pan-S		4.1.2.1	Haarlem	ungrouped	S	S	S	S
IT3515	SRR31008545	2019	Piedmont	1	Not available	0	4604618	4467436	97.02	140	22438	Pan-S		4.8	mainly T	group_106	S	S	S	S
IT3516	SRR31008544	2019	Piedmont	0	Not available	0	6650415	6472585	97.33	190	22725	Pan-S		4.3.3	LAM	ungrouped	S	S	S	S
IT3517	SRR31008867	2019	Piedmont	0	Not available	Not available	4391825	4234016	96.41	129	26031	Pan-S		4.3.3	LAM	ungrouped	S	S	S	S
IT3518	SRR31008866	2019	Piedmont	0	Not available	0	4787511	4652911	97.19	139	6211	Pan-S		4.8	mainly T	ungrouped	S	S	S	S
IT3519	SRR31008865	2019	Piedmont	0	Not available	Not available	5451873	5262280	96.52	158	8390	Pan-S		4.9	H37Rv-like	group_119	S	S	S	S
IT3520	SRR31008864	2019	Piedmont	1	Not available	0	4786131	4609125	96.3	143	17744	Pan-S		4.1.1.3	X-type	ungrouped	S	S	S	S
IT3521	SRR31008863	2019	Piedmont	1	Not available	Not available	4199089	4104322	97.74	127	57134	Pan-S		6	West-Africa 2	ungrouped	S	S	S	S
IT3522	SRR31008861	2019	Piedmont	0	Not available	1	6345081	6173853	97.3	191	21646	Pan-S		4.3.3	LAM	ungrouped	S	S	S	S
IT3523	SRR31008860	2019	Piedmont	1	Not available	0	5711540	5476890	95.89	169	23923	Pan-S		4.8	mainly T	group_200	S	S	S	S
IT3524	SRR31008859	2019	Piedmont	1	Not available	0	6185636	5973666	96.57	178	22778	Pan-S		4.8	mainly T	group_200	S	S	S	S
IT3525	SRR31008858	2019	Piedmont	1	Not available	0	5288581	5148419	97.35	146	8977	Pan-S		4.6.2	Euro-American	ungrouped	S	S	S	S
IT3526	SRR31008857	2019	Piedmont	1	Not available	0	5171902	5017101	97.01	155	21834	Pan-S		4.7	mainly T	ungrouped	S	S	S	S
IT3527	SRR31008856	2019	Piedmont	1	Not available	Not available	4913714	4758973	96.85	152	74638	Other	pncA:His57Asp	M. bovis	M. bovis	ungrouped	S	S	S	R
IT3528	SRR31008855	2019	Piedmont	1	Not available	Not available	2757021	2663344	96.6	74	29028	Pan-S		1.1.1	EAI	ungrouped	S	S
IT3529	SRR31008854	2019	Piedmont	1	Not available	0	3906338	3790745	97.04	119	15514	Pan-S		4.2.1	Ural	ungrouped	S	S	S	S
IT3530	SRR31008853	2019	Piedmont	0	Not available	Not available	4360500	4216832	96.71	131	11436	Other	gid:Val65Gly	4.8	mainly T	ungrouped	S	S	S	S
IT3532	SRR31008852	2019	Piedmont	0	Not available	Not available	4211416	4094204	97.22	129	73948	Other	pncA:His57Asp	M. bovis	M. bovis	ungrouped	S	S	S	R
IT3533	SRR31008850	2019	Piedmont	1	Not available	0	5596354	5423948	96.92	157	15890	Poly-resistant	gyrA: Asp94Gly , rrs:1472337_C>T_SNP	4.3.2	LAM	group_113	S	S	S	S
IT3534	SRR31008849	2019	Piedmont	0	Not available	Not available	5391207	5278816	97.92	157	17428	Other	rrs:1472362_C>T_SNP	4.4.1.1	S-type	ungrouped	S	S	S	S
IT3536	SRR31008848	2019	Piedmont	1	Not available	Not available	6163807	5806894	94.21	173	22422	Pan-S		4.8	mainly T	group_200	S	S	S	S
IT3537	SRR31008847	2019	Piedmont	1	Not available	0	5319746	5161531	97.03	159	26112	Mono-Rif	rpoB:Ser450Leu	4.8	mainly T	ungrouped	S	R	S	R		S	S	S	S
IT3538	SRR31008846	2019	Piedmont	0	Not available	0	5954126	5830003	97.92	171	16565	Pan-S		4.4.1.1	S-type	ungrouped	S	S	S	S
IT3539	SRR31008845	2019	Piedmont	0	Not available	Not available	5027488	4923825	97.94	146	17742	Pan-S		4.1.2.1	Haarlem	ungrouped	S	S	S	S
IT3540	SRR31008844	2019	Piedmont	0	Not available	0	3633597	3530242	97.16	109	19330	Pan-S		4.1.2.1	Haarlem	ungrouped	S	S	S	S
IT3542	SRR31008843	2019	Piedmont	0	Not available	0	1330529	1276635	95.95	38	50437	Pan-S		2.1	East-Asian non-Beijing	ungrouped	S	S	S	S
IT3543	SRR31008842	2019	Piedmont	0	Not available	Not available	5814123	5672713	97.57	163	19757	Mono-FQs	gyrA: Asp94Gly	4.4.1.1	S-type	ungrouped	S	S	S	S
IT3544	SRR31008841	2019	Piedmont	1	Not available	0	7030987	6778687	96.41	197	2923	Pan-S		4.1.2.1	Haarlem	ungrouped	S	S	S	S
IT3545	SRR31008839	2019	Piedmont	0	Not available	Not available	4266730	4136753	96.95	127	17287	Pan-S		4.4.1.1	S-type	ungrouped	S	S	S	S
IT3546	SRR31008838	2019	Piedmont	1	Not available	0	5806664	5677789	97.78	173	19678	Pan-S		4.1.2.1	Haarlem	ungrouped	S	S	S	S
IT3548	SRR31008837	2019	Piedmont	1	Not available	0	6225630	6028700	96.84	180	19350	Pan-S		4.8	mainly T	group_106	S	S	S	S
IT3549	SRR31008836	2019	Piedmont	1	Not available	Not available	5026302	4916844	97.82	146	19381	Pan-S		4.8	mainly T	ungrouped	S	S	S	S
IT3550	SRR31008835	2019	Piedmont	1	Not available	0	2472959	2397872	96.96	73	34183	Pan-S		4.1.2.1	Haarlem	group_235	S	S	S	S
IT3551	SRR31008834	2019	Piedmont	0	Not available	Not available	5845901	5635337	96.4	168	73584	Other	pncA:His57Asp	M. bovis	M. bovis	ungrouped	S	S	S	R		S	S	S	S
IT3552	SRR31008833	2019	Piedmont	1	Not available	Not available	4328971	4245489	98.07	128	8575	Mono-Rif	rpoB:Ser450Leu	3.1.1	Delhi-CAS	ungrouped	S	R	S	S
IT3553	SRR31008832	2019	Piedmont	0	Not available	Not available	3757431	3644906	97.01	112	11859	Pan-S		4.8	mainly T	group_71	S	S	S	S
IT3554	SRR31008759	2019	Piedmont	1	Not available	0	3815228	3696638	96.89	116	51233	Pan-S		4.6.2.2	Cameroon	group_52	S	S	S	S
IT3555	SRR31008758	2019	Piedmont	1	Not available	0	3567006	3450428	96.73	107	10772	Pan-S		4.8	mainly T	group_71	S	S	S	S
IT3556	SRR31008756	2019	Piedmont	0	Not available	Not available	4776410	4669239	97.76	142	23558	Pan-S		4.1.2.1	Haarlem	ungrouped	S	S	S	S
IT3557	SRR31008755	2019	Piedmont	1	Not available	0	4938640	4832911	97.86	148	48866	Pan-S		4.6.2.2	Cameroon	group_52	S	S	S	S
IT3558	SRR31008754	2019	Piedmont	0	Not available	0	2975879	2603826	87.5	80	75715	Other	pncA:His57Asp	M. bovis	M. bovis	ungrouped	S	S	S	R
IT3559	SRR31008753	2019	Piedmont	1	Not available	0	3998991	3667134	91.7	110	23467	Pan-S		5	West-Africa 1	ungrouped	S	S	S	S
IT3560	SRR31008752	2019	Piedmont	1	Not available	0	4191217	3928983	93.74	121	26427	Pan-S		4.1.2.1	Haarlem	group_173	S	S	S	S
IT3561	SRR31008751	2019	Piedmont	1	Not available	Not available	3842297	3646666	94.91	114	54289	Pan-S		6	West-Africa 2	ungrouped	S	S	S	S
IT3562	SRR31008750	2019	Piedmont	1	Not available	0	6036279	5637859	93.4	177	41436	Pan-S		4.6.2.2	Cameroon	ungrouped	S	S	S	S
IT3563	SRR31008749	2019	Piedmont	1	Not available	Not available	6932584	5993672	86.46	175	11021	MDR	katG:Ser315Thr, rpoB:Leu452Pro	4.4.2	Euro-American	ungrouped	R	R	S	S		S	S	S	S
IT3564	SRR31008748	2019	Piedmont	0	Not available	0	3661795	3510346	95.86	109	20709	Pan-S		4.4.1.1	S-type	ungrouped	S	S	S	S
IT3565	SRR31008747	2019	Piedmont	1	Not available	0	5451500	5282537	96.9	155	9433	Pan-S		3	Delhi-CAS	ungrouped	S	S	S	S
IT3566	SRR31008744	2019	Piedmont	1	Not available	0	4136240	3819238	92.34	118	24503	Pan-S		4.3	LAM	group_151	S	S	S	S
IT3567	SRR31008743	2019	Piedmont	1	Not available	Not available	2805807	2561928	91.31	77	21974	Pan-S		4.1.2.1	Haarlem	ungrouped	S	S	S	S
IT3568	SRR31008742	2019	Piedmont	1	Not available	0	4704379	4554810	96.82	141	26763	Pan-S		4.1.2.1	Haarlem	group_173	S	S	S	S
IT3569	SRR31008741	2019	Piedmont	1	Not available	0	3788192	3591692	94.81	110	15585	Pan-S		4.8	mainly T	ungrouped	S	S	S	S
IT3570	SRR31008740	2019	Piedmont	1	Not available	0	5434456	5226358	96.17	153	6174	Pan-S		4.4.2	Euro-American	group_179	S	S	S	S
IT3572	SRR31008739	2019	Piedmont	1	Not available	Not available	3506846	3181539	90.72	97	27174	Pan-S		4.3.1	LAM	group_214	S	S	S	S
IT3573	SRR31008738	2019	Piedmont	0	Not available	0	2992932	2885059	96.4	87	30778	Pan-S		4.1.2.1	Haarlem	group_235	S	S	S	S
IT3574	SRR31008737	2019	Piedmont	1	Not available	0	4921938	4807791	97.68	147	17481	Pan-S		4.8	mainly T	ungrouped	S	S	S	S
IT3576	SRR31008736	2019	Piedmont	0	Not available	Not available	4699274	4603056	97.95	143	73869	Other	pncA:His57Asp	M. bovis	M. bovis	ungrouped	S	S	S	R
IT3578	SRR31008735	2019	Piedmont	1	Not available	0	2358783	2323995	98.53	72	27822	Mono-FQs	gyrA: Ala90Val	4.1.2.1	Haarlem	ungrouped	S	S	S	S
IT3581	SRR31008733	2017	Piedmont	1	Not available	0	1390154	1363118	98.06	35	24205	Pan-S		4.1.2.1	Haarlem	ungrouped	S	S	S	S
IT3583	SRR31008732	2017	Piedmont	1	Not available	0	2886831	2175175	75.35	55	20754	Pan-S		3	Delhi-CAS	ungrouped	S	S	S	S
IT3585	SRR31008731	2017	Piedmont	1	Not available	0	2320371	2281679	98.33	68	19257	Pan-S		4.1.2.1	Haarlem	ungrouped	S	S	S	S
IT3586	SRR31008730	2017	Piedmont	1	Not available	0	3501724	3430664	97.97	105	20987	Mono-INH	katG:Ser315Thr	4.3.3	LAM	ungrouped	R	S	S	S
IT3587	SRR31008729	2017	Piedmont	1	Not available	Not available	4471308	4389767	98.18	137	44317	Pan-S		4.6.2.2	Cameroon	ungrouped	S	S	S	S
IT3588	SRR31008728	2017	Piedmont	1	Not available	Not available	2100958	2048212	97.49	48	12188	Pan-S		4.9	H37Rv-like	ungrouped	S	S	S	S
IT3591	SRR31008727	2017	Piedmont	1	Not available	0	1429264	1406527	98.41	43	47296	Pan-S		4.4.1.1	S-type	ungrouped	S	S	S	S
IT3592	SRR31008726	2017	Piedmont	1	Not available	0	1892577	1867037	98.65	50	16536	Pan-S		4.7	mainly T	ungrouped	S	S	S	S		S	S	S	S
IT3593	SRR31008725	2017	Piedmont	1	Not available	1	2190918	2153480	98.29	65	9011	Pan-S		3	Delhi-CAS	ungrouped	S	S	S	S
IT3594	SRR31008724	2017	Piedmont	1	Not available	0	1704082	1673592	98.21	49	22872	Pan-S		4.8	mainly T	ungrouped	S	S	S	S
IT3596	SRR31008398	2017	Piedmont	1	Not available	0	2578884	2533265	98.23	76	21051	Pan-S		4.1.2.1	Haarlem	ungrouped	S	S	S	S
IT3597	SRR31008397	2017	Piedmont	0	Not available	Not available	1253093	1225785	97.82	35	17538	Pan-S		4.1.2.1	Haarlem	ungrouped	S	S	S	S
IT3598	SRR31008396	2017	Piedmont	1	Not available	0	2497744	2406204	96.34	70	10318	Mono-INH	katG:Ser315Thr	4.5	Euro-American	ungrouped	R	S	S	S
IT3600	SRR31008395	2017	Piedmont	1	Not available	0	4152105	4071084	98.05	127	15547	Pan-S		4.1.2	Euro-American	group_220	S	S	S	S
IT3602	SRR31008394	2017	Piedmont	1	Not available	1	1446836	1418083	98.01	44	51454	Pan-S		6	West-Africa 2	ungrouped	S	S	S	S
IT3603	SRR31008393	2017	Piedmont	1	Not available	0	3970009	3893653	98.08	117	8406	Pan-S		4.8	mainly T	ungrouped	S	S	S	S
IT3604	SRR31008392	2017	Piedmont	1	Not available	0	2136716	2099572	98.26	66	33432	Pan-S		2.2.1	Beijing	group_1	S	S	S	S
IT3606	SRR31008391	2017	Piedmont	0	Not available	Not available	1173949	1154110	98.31	32	17132	Pan-S		4.8	mainly T	ungrouped	S	S				S	S	S	S
IT3607	SRR31008390	2017	Piedmont	1	Not available	0	2836332	2788377	98.31	79	21393	Pan-S		4.1.2.1	Haarlem	ungrouped	S	S	S	S
IT3608	SRR31008389	2017	Piedmont	1	Not available	1	1509661	1473408	97.6	39	47659	Pan-S		4.6.2.2	Cameroon	group_52	S	S	S	S
IT3609	SRR31008387	2017	Piedmont	1	Not available	0	1206562	1186770	98.36	37	46144	Pan-S		7	Ethiopia	ungrouped	S	S	S	R
IT3610	SRR31008386	2017	Piedmont	1	Not available	0	1814786	1787323	98.49	56	35969	pre_XDR	embB:Met306Val, gyrA: Ala90Val , katG: Ser315Thr, pncA:Asp8Gly, rpoB:Ser450Leu, rpsL:Lys43Arg	2.2.1	Beijing	ungrouped	R	R					R
IT3611	SRR31008385	2017	Piedmont	1	Not available	Not available	1957577	1917882	97.97	55	16351	Pan-S		4.1.2.1	Haarlem	ungrouped	S	S	S	S
IT3612	SRR31008384	2017	Piedmont	1	Not available	0	1372659	1139389	83.01	33	19921	Pan-S		4.1.2	Euro-American	ungrouped	S	S	S	S
IT3613	SRR31008383	2017	Piedmont	1	Not available	0	1096809	1078355	98.32	30	20888	Pan-S		4.8	mainly T	ungrouped	S	S	S	S
IT3614	SRR31008382	2017	Piedmont	0	Not available	0	2424960	2390717	98.59	75	18085	Pan-S		4.8	mainly T	ungrouped	S	S	S	S
IT3616	SRR31008381	2017	Piedmont	0	Not available	0	1141373	1122316	98.33	32	12460	Other	gid:Val65Gly	4.8	mainly T	ungrouped	S	S	S	S
IT3619	SRR31008380	2017	Piedmont	1	Not available	0	1844350	1812351	98.27	56	22128	MDR	katG:Ser315Thr, rpoB:Ser450Leu	4.3.1	LAM	ungrouped	R	R	S	S		S	S	S	S
IT3620	SRR31008379	2017	Piedmont	1	Not available	0	989271	966928	97.74	29	24207	Pan-S		4.8	mainly T	group_164	S	S	S	S
IT3623	SRR31008378	2017	Piedmont	0	Not available	0	877644	860272	98.02	26	37216	MDR	katG: Ser315Thr, pncA:Asp8Glu, rpoB:Ser450Leu, rpsL:Lys43Arg	2.2.1	Beijing	ungrouped	R	R	R	R		S	S	R	S
IT3625	SRR31008376	2017	Piedmont	0	Not available	0	1129470	1093476	96.81	33	26260	Pan-S		4.7	mainly T	ungrouped	S	S	S	S
IT3626	SRR31008375	2017	Piedmont	0	Not available	0	4421156	4326913	97.87	112	54359	Pan-S		4.3.4.2	LAM	group_120	S	S	S	S
IT3627	SRR31008374	2017	Piedmont	1	Not available	0	3304399	3236692	97.95	99	6791	Pan-S		4.4.2	Euro-American	group_179	S	S	S	S
IT3628	SRR31008373	2017	Piedmont	1	Not available	0	3091899	3025772	97.86	91	26865	Pan-S		4.2.1	Ural	ungrouped	S	S	S	S
IT3629	SRR31008372	2017	Piedmont	0	Not available	Not available	3054849	2998258	98.15	90	13386	Pan-S		4.9	H37Rv-like	ungrouped	S	S	S	S
IT3630	SRR31008371	2018	Piedmont	1	Not available	Not available	2815518	2749217	97.65	84	48057	Pan-S		4.6.2.2	Cameroon	ungrouped	S	S	S	S
IT3631	SRR31008370	2018	Piedmont	0	Not available	0	2906497	2850765	98.08	83	18021	Pan-S		4.1.2.1	Haarlem	ungrouped	S	S	S	S		S	S	R	S
IT3632	SRR31008369	2018	Piedmont	1	Not available	0	2727146	2657845	97.46	75	25492	Pan-S		4.1.2.1	Haarlem	ungrouped	S	S	S	S
IT3633	SRR31008368	2018	Piedmont	0	Not available	Not available	3585377	3509798	97.89	98	31345	Pan-S		4	Euro-American	ungrouped	S	S	S	S
IT3634	SRR31008367	2018	Piedmont	1	Not available	Not available	4465265	4382530	98.15	132	15547	Pan-S		4.8	mainly T	ungrouped	S	S	S	S
IT3635	SRR31008365	2018	Piedmont	1	Not available	0	3810520	3740831	98.17	114	12743	Pan-S		4.8	mainly T	group_158	S	S	S	S
IT3636	SRR31008364	2018	Piedmont	1	Not available	0	1717336	1678596	97.74	51	27213	Pan-S		4.1.2.1	Haarlem	group_70	S	S	S	S
IT3637	SRR31008543	2018	Piedmont	1	Not available	0	1069548	1045818	97.78	31	17513	Pan-S		4.1	Euro-American	ungrouped	S	S	S	S
IT3638	SRR31008542	2018	Piedmont	1	Not available	0	5567452	5461515	98.1	172	16185	Poly-resistant	fabG1_ups:C-15T- 1673425, katG:Ser315Thr	4.1	Euro-American	ungrouped	R	S	S	S		S	S	R	S
IT3639	SRR31008541	2018	Piedmont	1	Not available	0	1327988	1299819	97.88	37	24709	Pan-S		4.1.2.1	Haarlem	ungrouped	S	S	S	S
IT3640	SRR31008540	2018	Piedmont	1	Not available	0	3365206	3293123	97.86	99	20184	Pan-S		4.1.2.1	Haarlem	ungrouped	S	S	S	S
IT3641	SRR31008539	2018	Piedmont	1	Not available	0	3652995	3581664	98.05	108	9539	Pan-S		4.1	Euro-American	ungrouped	S	S	S	S
IT3642	SRR31008538	2018	Piedmont	1	Not available	0	2571254	2510919	97.65	57	27685	Pan-S		4.7	mainly T	ungrouped	S	S	S	S
IT3643	SRR31008537	2018	Piedmont	1	Not available	0	2315040	2262696	97.74	67	15582	Pan-S		1.2.1	EAI Manila	ungrouped	S	S	S	S
IT3644	SRR31008536	2018	Piedmont	1	Not available	0	3004716	2940874	97.88	88	26211	Pan-S		4.1.2.1	Haarlem	ungrouped	S	S	S	S
IT3645	SRR31008534	2018	Piedmont	1	Not available	0	2071437	2035708	98.28	61	48733	Pan-S		4.6.2.2	Cameroon	group_52	S	S	S	S
IT3647	SRR31008533	2018	Piedmont	1	Not available	Not available	4725742	4645643	98.31	149	20480	Pan-S		4.1.2.1	Haarlem	ungrouped	S	S	S	S
IT3648	SRR31008532	2018	Piedmont	1	Not available	0	2055121	2011703	97.89	60	18624	Pan-S		3	Delhi-CAS	ungrouped	S	S	S	S
IT3649	SRR31008531	2018	Piedmont	1	Not available	Not available	1514903	1474305	97.32	42	13634	Pan-S		3.1.1	Delhi-CAS	ungrouped	S	S	S	S
IT3650	SRR31008530	2018	Piedmont	1	Not available	Not available	2176622	2137075	98.18	64	48539	Pan-S		4.6.2.2	Cameroon	group_52	S	S	S	S
IT3651	SRR31008529	2018	Piedmont	1	Not available	0	3840314	3759924	97.91	117	33989	Other	rpsL:Lys43Arg	2.2.1	Beijing	ungrouped	S	S	S	S
IT3652	SRR31008528	2018	Piedmont	1	Not available	0	2510558	2463800	98.14	76	23739	Pan-S		4.6.2	Euro-American	group_139	S	S
IT3653	SRR31008527	2018	Piedmont	1	Not available	0	4775152	4664541	97.68	128	8698	Pan-S		1.2.1	EAI Manila	ungrouped	S	S	S	S
IT3654	SRR31008526	2018	Piedmont	1	Not available	0	2480128	2409906	97.17	69	7500	Pan-S		3	Delhi-CAS	ungrouped	S	S	S	S
IT3655	SRR31008525	2018	Piedmont	1	Not available	0	2941878	2774590	94.31	83	14184	Pan-S		4.8	mainly T	ungrouped	S	S	S	S
IT3656	SRR31008523	2018	Piedmont	0	Not available	Not available	2846860	2797405	98.26	84	14114	Pan-S		4.8	mainly T	ungrouped	S	S	S	S
IT3657	SRR31008522	2018	Piedmont	1	Not available	Not available	3253518	3185926	97.92	98	24715	Mono-INH	fabG1_ups:C-15T- 1673425	4.1.2.1	Haarlem	ungrouped	R	S	S	S
IT3658	SRR31008521	2018	Piedmont	1	Not available	Not available	1442514	1399610	97.03	38	28742	Pan-S		4.1.2.1	Haarlem	ungrouped	S	S	S	S
IT3659	SRR31008520	2018	Piedmont	0	Not available	Not available	2892872	2816813	97.37	71	41714	Pan-S		4.3.4.1	LAM	ungrouped	S	S	S	S
IT3663	SRR31008519	2018	Piedmont	1	Not available	0	5090487	5031328	98.84	158	52044	Pan-S		4.3.4.2	LAM	group_120	S	S	S	S
IT3665	SRR31008518	2018	Piedmont	1	Not available	0	2063801	2023230	98.03	63	28562	Pan-S		4.6	Euro-American	ungrouped	S	S	S	S
IT3666	SRR31008517	2018	Piedmont	1	Not available	0	2021233	1981865	98.05	62	14383	Pan-S		4.1.2	Euro-American	ungrouped	S	S	S	S
IT3667	SRR31008516	2018	Piedmont	1	Not available	0	895591	874885	97.69	26	20150	Other	rrs:1472337_C>T_SNP	4.3.2	LAM	group_113	S	S	S	S
IT3668	SRR31008515	2018	Piedmont	1	Not available	0	1684228	1652454	98.11	52	19881	Pan-S		3	Delhi-CAS	group_247	S	S	S	S
IT3669	SRR31008514	2018	Piedmont	1	Not available	0	1265113	1233217	97.48	38	50349	Pan-S		4.6.2.2	Cameroon	group_52	S	S
IT3670	SRR31008512	2018	Piedmont	1	Not available	0	2423049	2378375	98.16	75	15727	Pan-S		4.8	mainly T	ungrouped	S	S	S	S
IT3671	SRR31008511	2018	Piedmont	0	Not available	0	1387029	1330019	95.89	39	31610	Pan-S		4.7	mainly T	ungrouped	S	S	S	S
IT3672	SRR31008510	2018	Piedmont	1	Not available	Not available	1052685	1019389	96.84	30	19498	Pan-S		4.8	mainly T	ungrouped	S	S	S	S
IT3673	SRR31008509	2018	Piedmont	0	Not available	0	1703538	1650109	96.86	50	27657	Pan-S		4.1.2.1	Haarlem	ungrouped	S	S	S	S
IT3674	SRR31008508	2018	Piedmont	0	Not available	1	2305347	2231461	96.8	69	15619	Pan-S		4.8	mainly T	group_264	S	S	S	S
IT3676	SRR31008723	2018	Piedmont	1	Not available	0	716540	703620	98.2	21	26560	Pan-S		4.7	mainly T	group_107	S	S	S	S
IT3677	SRR31008722	2018	Piedmont	0	Not available	0	1270557	1248192	98.24	38	21385	Pan-S		4.4.1.1	S-type	ungrouped	S	S	S	S
IT3678	SRR31008721	2018	Piedmont	1	Not available	Not available	827499	812485	98.19	23	27368	Pan-S		4.1.2.1	Haarlem	group_250	S	S	S	S
IT3679	SRR31008720	2018	Piedmont	1	Not available	Not available	1190031	1169374	98.26	35	55285	Pan-S		4.3.4.2	LAM	ungrouped	S	S	S	S
IT3680	SRR31008719	2018	Piedmont	1	Not available	0	844617	827380	97.96	25	22242	Pan-S		4.4.1.1	S-type	ungrouped	S	S	S	S
IT3681	SRR31008717	2018	Piedmont	1	Not available	0	2669851	2618731	98.09	73	9576	Pan-S		3.1.1	Delhi-CAS	group_100	S	S	S	S
IT3683	SRR31008716	2018	Piedmont	1	Not available	0	3034524	2904466	95.71	89	9271	Pan-S		3.1.1	Delhi-CAS	group_100	S	S	S	S		S	S	S	S
IT3684	SRR31008715	2018	Piedmont	1	Not available	Not available	1822100	1787348	98.09	57	22136	Pan-S		3	Delhi-CAS	ungrouped	S	S	S	S
IT3686	SRR31008714	2018	Piedmont	1	Not available	0	2272204	2237857	98.49	68	28653	Pan-S		4.8	mainly T	ungrouped	S	S	S	S
IT3687	SRR31008713	2018	Piedmont	1	Not available	0	1480084	1445800	97.68	44	10912	Pan-S		4.2.1	Ural	ungrouped	S	S	S	S
IT3688	SRR31008712	2018	Piedmont	1	Not available	0	2131305	2101050	98.58	67	11275	Pan-S		3	Delhi-CAS	ungrouped	S	S	S	S
IT3690	SRR31008711	2018	Piedmont	1	Not available	Not available	1860357	1830228	98.38	52	15727	Pan-S		4.3.1	LAM	group_191	S	S	S	S
IT3691	SRR31008710	2018	Piedmont	1	Not available	Not available	1819174	1792807	98.55	51	49082	Pan-S		4.6.2.2	Cameroon	group_52	S	S	S	S
IT3692	SRR31008709	2018	Piedmont	1	Not available	0	1847941	1813945	98.16	55	26446	MDR	katG:Ser315Thr, pncA:Gly97Asp, rpoB:Ser450Leu	4.3.3	LAM	ungrouped	R	R	S	R		S	S	R	S
IT3693	SRR31008708	2018	Piedmont	1	Not available	0	2172215	2142121	98.61	68	52813	Pan-S		4.6.2.2	Cameroon	group_52	S	S
IT3694	SRR31008705	2018	Piedmont	1	Not available	0	1619495	1590864	98.23	49	48485	Pan-S		4.6.2.2	Cameroon	ungrouped	S	S	S	S
IT3695	SRR31008704	2018	Piedmont	1	Not available	0	2113771	2084022	98.59	66	31949	Pan-S		4.8	mainly T	group_160	S	S	S	S
IT3696	SRR31008703	2018	Piedmont	1	Not available	0	1285873	1264913	98.37	36	9524	MDR	embB:Met306Ile , katG:Ser315Thr, rpoB:His445Asn His445Arg	4.2.1	Ural	ungrouped	R	R	R	S		S	S	S	S
IT3697	SRR31008702	2018	Piedmont	1	Not available	0	1539104	1499397	97.42	45	22802	Pan-S		4.1.2.1	Haarlem	ungrouped	S	S	S	S
IT3698	SRR31008701	2018	Piedmont	1	Not available	0	1595930	1564102	98.01	48	28118	Pan-S		4.2.1	Ural	ungrouped	S	S	S	S
IT3700	SRR31008700	2018	Piedmont	1	Not available	Not available	4381782	4332888	98.88	140	22719	Pan-S		4.4.1.1	S-type	ungrouped	S	S	S	S
IT3701	SRR31008699	2018	Piedmont	1	Not available	0	1824419	1799510	98.63	57	24879	Pan-S		4.1.2.1	Haarlem	ungrouped	S	S	S	S
IT3702	SRR31008698	2018	Piedmont	1	Not available	0	2368723	2341880	98.87	75	50993	Pan-S		4.6.2.2	Cameroon	group_52	S	S	S	S
IT3703	SRR31008697	2018	Piedmont	0	Not available	Not available	2158697	2128234	98.59	67	16355	Other	rpsL:Lys43Arg	4.9	H37Rv-like	ungrouped	S	S	S	S
IT3704	SRR31008696	2018	Piedmont	1	Not available	1	2070990	2040657	98.54	65	15145	Pan-S		4.1.1.1	X-type	ungrouped	S	S	S	S
IT3705	SRR31008694	2018	Piedmont	0	Not available	Not available	2767531	2732206	98.72	88	10029	Pan-S		4.9	H37Rv-like	group_119	S	S	S	S
IT3706	SRR31008693	2018	Piedmont	1	Not available	0	3494893	3431604	98.19	99	23462	Pan-S		4.8	mainly T	group_200	S	S	S	S
IT3707	SRR31008692	2018	Piedmont	0	Not available	Not available	6079907	5946205	97.8	176	21042	Pan-S		4.3.3	LAM	ungrouped	S	S	S	S
IT3708	SRR31008691	2018	Piedmont	1	Not available	0	2220663	2173468	97.87	66	20962	Pan-S		4.3.1	LAM	ungrouped	S	S	S	S
IT3709	SRR31008690	2018	Piedmont	0	Not available	0	2267110	2225210	98.15	71	13674	Pan-S		4.8	mainly T	group_264	S	S	S	S
IT3710	SRR31008689	2018	Piedmont	0	Not available	Not available	5015696	4842157	96.54	158	6380	Pan-S		4.8	mainly T	ungrouped	S	S	S	S
IT3711	SRR31008688	2018	Piedmont	1	Not available	0	5608056	5350111	95.4	157	22809	Pan-S		4.4.1	Euro-American	ungrouped	S	S	S	S
IT3712	SRR31008363	2018	Piedmont	0	Not available	Not available	3897348	3814864	97.88	117	14814	Pan-S		4.4.1.1	S-type	ungrouped	S	S	S	S
IT3713	SRR31008362	2018	Piedmont	1	Not available	0	6370003	6175014	96.94	176	23529	Pan-S		3	Delhi-CAS	group_29	S	S	S	S
IT3714	SRR31008361	2018	Piedmont	0	Not available	0	6348322	6201108	97.68	179	23234	Pan-S		3	Delhi-CAS	group_29	S	S	S	S		S	S	S	S
IT3715	SRR31008359	2018	Piedmont	1	Not available	Not available	4667693	4539117	97.25	140	18209	Pan-S		4.8	mainly T	group_160	S	S	S	S
IT3716	SRR31008358	2020	Piedmont	0	Not available	Not available	5657004	5476098	96.8	167	17438	Pan-S		4.4.1.1	S-type	ungrouped	S	S	S	S
IT3717	SRR31008357	2020	Piedmont	0	Not available	0	5885211	5773295	98.1	173	28702	Pan-S		4.1.2.1	Haarlem	ungrouped	S	S	S	S
IT3718	SRR31008356	2020	Piedmont	1	Not available	0	4952649	4864790	98.23	154	43169	Pan-S		4.6.2.2	Cameroon	ungrouped	S	S	S	S
IT3719	SRR31008355	2020	Piedmont	1	Not available	0	4112255	4046494	98.4	128	10531	Pan-S		4.8	mainly T	group_122	S	S	S	S
IT3720	SRR31008354	2020	Piedmont	1	Not available	0	4074849	3994725	98.03	117	17220	Pan-S		4.1.2.1	Haarlem	ungrouped	S	S	S	S
IT3721	SRR31008353	2020	Piedmont	0	Not available	0	6465493	6346695	98.16	199	14093	Pan-S		4.1.2.1	Haarlem	ungrouped	S	S	S	S
IT3722	SRR31008352	2020	Piedmont	0	Not available	0	4630764	4542977	98.1	132	32102	Pan-S		4.3.3	LAM	ungrouped	S	S	S	S
IT3723	SRR31008351	2020	Piedmont	1	Not available	0	2635390	2550880	96.79	80	22662	Other	rrs:1472359_A>C_SNP	3.1.1	Delhi-CAS	ungrouped	S	S	S	S		S	S	S	S
IT3724	SRR31008350	2020	Piedmont	0	Not available	0	2389021	2350058	98.37	74	23681	Pan-S		4.4.1.1	S-type	ungrouped	S	S	S	S
IT3725	SRR31008348	2020	Piedmont	1	Not available	0	2561370	2520926	98.42	80	25741	Pan-S		4.1.2.1	Haarlem	ungrouped	S	S	S	S
IT3727	SRR31008347	2020	Piedmont	1	Not available	Not available	3467688	3403893	98.16	103	14106	Mono-FQs	gyrA: Ser91Pro	3	Delhi-CAS	ungrouped	S	S	S	S
IT3728	SRR31008346	2020	Piedmont	0	Not available	Not available	3761440	3680330	97.84	113	17182	Poly-resistant	katG:Ser315Thr, rpsL:Lys43Arg	4.1.2	Euro-American	ungrouped	R	S	S	S		S	S	S	S
IT3729	SRR31008345	2020	Piedmont	0	Not available	0	1611712	1586604	98.44	49	23777	Mono-INH	inhA:Ser94Ala	4.4.1.1	S-type	ungrouped	R	S	S	S		S	S	R	S
IT3730	SRR31008344	2020	Piedmont	1	Not available	Not available	1372575	1345011	97.99	42	32152	Pan-S		4.8	mainly T	group_200	S	S	S	S
IT3731	SRR31008343	2020	Piedmont	0	Not available	0	3997276	3927182	98.25	106	20939	Pan-S		4.1.2.1	Haarlem	ungrouped	S	S	S	S
IT3732	SRR31008342	2020	Piedmont	1	Not available	Not available	3704488	3645115	98.4	116	15957	Pan-S		4.1	Euro-American	ungrouped	S	S	S	S
IT3737	SRR29126606	2017	Lombardy	1	0	Not available	4312018	4232081	98.15	128	30557	Pan-S		2.2.1	Beijing	ungrouped	S	S	S	S
IT3738	SRR29126605	2017	Lombardy	1	0	Not available	7104664	6987142	98.35	229	18776	Pan-S		4.1.2.1	Haarlem	group_150	S	S	S	S
IT3739	SRR29126604	2017	Lombardy	0	0	Not available	4056847	3982177	98.16	124	53020	Pan-S		4.3.4.1	LAM	ungrouped	S	S	S	S
IT3740	SRR29126603	2017	Lombardy	1	0	Not available	2741940	2694932	98.29	86	28432	Pan-S		4.3.3	LAM	ungrouped	S	S	S	S
IT3741	SRR29126602	2017	Lombardy	1	0	Not available	6058879	5927494	97.83	176	12829	Pan-S		1.2.1	EAI Manila	ungrouped	S	S	S	S
IT3742	SRR29126601	2017	Lombardy	1	0	Not available	2470178	2431975	98.45	79	51904	Pan-S		4.6.2.2	Cameroon	ungrouped	S	S	S	S
IT3743	SRR29126599	2017	Lombardy	1	0	Not available	2338768	2305353	98.57	73	16446	Pan-S		4.8	mainly T	group_158	S	S	S	S
IT3744	SRR29126598	2017	Lombardy	1	0	Not available	3185590	3141279	98.61	93	19915	Pan-S		4.8	mainly T	group_249	S	S	S	S
IT3745	SRR29126597	2017	Lombardy	1	1	Not available	4986417	4910624	98.48	155	23403	Pan-S		3	Delhi-CAS	ungrouped	S	S	S	S
IT3746	SRR29126596	2017	Lombardy	1	0	Not available	5902706	5799180	98.25	178	14587	MDR	embB:Met306Ile Gln497Lys, katG: Ser315Thr, rpoB:Ser450Leu	3	Delhi-CAS	ungrouped	R	R	R	R		S	S		S
IT3747	SRR29126595	2017	Lombardy	1	1	Not available	8172601	8056218	98.58	260	46264	Mono-INH	inhA:Ser94Ala	4.3.4.1	LAM	ungrouped	R	S	S	S
IT3748	SRR29126594	2017	Lombardy	1	0	Not available	4500987	4438399	98.61	142	12666	Pan-S		3	Delhi-CAS	ungrouped	S	S	S	S
IT3749	SRR29126593	2017	Lombardy	1	0	Not available	3881956	3815901	98.3	123	24944	Pan-S		4.1.2.1	Haarlem	ungrouped	S	S	S	S
IT3750	SRR29126592	2017	Lombardy	1	1	Not available	3310694	3258891	98.44	103	25275	Pan-S		4.1.2.1	Haarlem	ungrouped	S	S	S	S
IT3752	SRR29126591	2017	Lombardy	1	0	Not available	2034211	1994385	98.04	60	16533	Pan-S		3	Delhi-CAS	ungrouped	S	S	S	S
IT3753	SRR29126590	2017	Lombardy	1	0	Not available	4219975	4136110	98.01	121	15139	Pan-S		3	Delhi-CAS	ungrouped	s	s	s	s
IT3754	SRR29126588	2017	Lombardy	0	1	Not available	3591486	3533522	98.39	113	54568	Pan-S		4.3.4.2	LAM	ungrouped	S	S	S	S
IT3755	SRR29126587	2017	Lombardy	1	0	Not available	1286740	1260381	97.95	39	25291	MDR	embB:Gly406Ala, katG:Ser315Thr, pncA:Thr76Pro, rpoB:Ser450Leu	4.2.2	Euro-American	group_216	R	R	S	R
IT3756	SRR29126586	2017	Lombardy	1	0	Not available	4864099	4778390	98.24	156	27844	Pan-S		4.1.2.1	Haarlem	ungrouped	S	S	S	S
IT3757	SRR29126585	2017	Lombardy	1	0	Not available	1784081	1742419	97.66	54	25032	Pan-S		4.1.2.1	Haarlem	ungrouped	S	S	S	S
IT3758	SRR29126584	2017	Lombardy	0	0	Not available	2365669	2328102	98.41	74	30934	Pan-S		4.3.3	LAM	ungrouped	S	S	S	S
IT3759	SRR29126583	2017	Lombardy	1	0	Not available	4222280	4146875	98.21	121	21309	Pan-S		4.3.3	LAM	ungrouped	S	S	S	S
IT3761	SRR29126582	2017	Lombardy	0	0	Not available	2371210	2314379	97.6	72	14055	Pan-S		1.2.1	EAI Manila	group_25	S	S	S	S
IT3762	SRR29126581	2017	Lombardy	1	0	Not available	6275308	6179259	98.47	193	19402	Pan-S		3	Delhi-CAS	ungrouped	S	S	S	S
IT3763	SRR29126580	2017	Lombardy	1	0	Not available	1610978	1579823	98.07	47	14541	Pan-S		4.1.2.1	Haarlem	ungrouped	S	S	S	S
IT3764	SRR29126579	2017	Lombardy	0	0	Not available	1720799	1687262	98.05	52	28495	Pan-S		4.3.3	LAM	ungrouped	S	S	S	S
IT3765	SRR29126958	2017	Lombardy	0	0	Not available	1834232	1780747	97.08	55	21925	Other	rrs:1472337_C>T_SNP	4.3.2	LAM	ungrouped	S	S	S	S
IT3766	SRR29126957	2017	Lombardy	1	1	Not available	2278253	2229712	97.87	66	17183	Mono-INH	katG:Ser315Thr	1.2.1	EAI Manila	ungrouped	R	S	S	S
IT3767	SRR29126956	2017	Lombardy	1	0	Not available	4124412	4058464	98.4	122	14019	Pan-S		3.1.2	Delhi-CAS	group_238	S	S	S	S
IT3769	SRR29126955	2017	Lombardy	0	0	Not available	2591757	2552667	98.49	78	60226	Pan-S		4.3.4.2	LAM	group_123	S	S	S	S
IT3770	SRR29126954	2017	Lombardy	0	1	Not available	1146988	1127462	98.3	32	24348	Other	rrs:1472337_C>T_SNP	4.3.2	LAM	group_37	S	S	S
IT3771	SRR29126953	2017	Lombardy	0	0	Not available	4399171	4330712	98.44	136	26405	Pan-S		4.1.2	Euro-American	ungrouped	S	S	S	R
IT3772	SRR29126952	2017	Lombardy	1	0	Not available	3893714	3817578	98.04	115	20836	Pan-S		4.1.2.1	Haarlem	ungrouped	S	S	S	S
IT3773	SRR29126951	2017	Lombardy	1	0	Not available	1568369	1536671	97.98	44	38439	Pan-S		1.2.1	EAI Manila	ungrouped	S	S	S	S
IT3774	SRR29126950	2017	Lombardy	1	1	Not available	1888160	1855986	98.3	51	21704	Pan-S		4.8	mainly T	ungrouped	S	S	S	S
IT3775	SRR29126949	2017	Lombardy	1	0	Not available	3895894	3816689	97.97	120	33355	Pan-S		4.3.1	LAM	group_214	S	S
IT3776	SRR29126947	2017	Lombardy	0	0	Not available	1934928	1897374	98.06	52	24913	Pan-S		4.4.1.1	S-type	ungrouped	S	S	S	S
IT3777	SRR29126946	2017	Lombardy	0	1	Not available	2658772	2611419	98.22	83	15850	Pan-S		4.8	mainly T	group_75	S	S	S	S
IT3778	SRR29126945	2017	Lombardy	1	0	Not available	1507675	1482206	98.31	47	35212	Pan-S		4.3.3	LAM	ungrouped	S	S	S	S
IT3780	SRR29126944	2017	Lombardy	1	1	Not available	3400017	3338880	98.2	101	35446	Pan-S		2.2.1	Beijing	ungrouped	S	S	S	S
IT3781	SRR29126943	2017	Lombardy	1	1	Not available	2179517	2135696	97.99	67	28003	Pan-S		4.2.1	Ural	ungrouped	S	S	S	S
IT3782	SRR29126942	2017	Lombardy	1	1	Not available	2580892	2545117	98.61	78	35432	Pan-S		4.8	mainly T	ungrouped	S	S	S	S
IT3783	SRR29126941	2017	Lombardy	1	0	Not available	5884313	5797039	98.52	181	24776	MDR	katG: Ser315Thr, rpoB:His445Tyr	3	Delhi-CAS	ungrouped	R	R	S	S
IT3785	SRR29126940	2017	Lombardy	1	1	Not available	2425766	2380018	98.11	67	23459	Pan-S		4.1.2.1	Haarlem	ungrouped	S	S	S	S
IT3786	SRR29126939	2017	Lombardy	1	0	Not available	1850541	1821568	98.43	56	29728	Pan-S		4.7	mainly T	ungrouped	S	S	S	S
IT3787	SRR29126938	2017	Lombardy	0	0	Not available	2563976	2522742	98.39	79	14038	Pan-S		4.9	H37Rv-like	ungrouped	S	S	S	S
IT3788	SRR29126936	2017	Lombardy	0	0	Not available	2308982	2274202	98.49	72	31827	Pan-S		4.7	mainly T	ungrouped	S	S	S	S
IT3789	SRR29126935	2017	Lombardy	0	0	Not available	945499	931062	98.47	29	64600	Pan-S		4.3.4.2	LAM	ungrouped	S	S	S	S
IT3790	SRR29126934	2017	Lombardy	1	0	Not available	3116621	3056416	98.07	87	40808	Pan-S		3	Delhi-CAS	ungrouped	S	S	S	S
IT3791	SRR29126933	2017	Lombardy	1	0	Not available	3806950	3745611	98.39	114	30525	Pan-S		4.1.2.1	Haarlem	group_224	S	S	S	S
IT3792	SRR29126932	2017	Lombardy	0	0	Not available	1293319	1276829	98.72	40	28743	Pan-S		4.8	mainly T	ungrouped	S	S	S	S
IT3794	SRR29126931	2017	Lombardy	1	0	Not available	3157561	3097591	98.1	95	16036	MDR	katG: Ser315Thr, rpoB:Leu452Pro, rpsL:Lys43Arg	3	Delhi-CAS	group_17	R	R	S	S
IT3795	SRR29126930	2017	Lombardy	0	0	Not available	2413295	1108333	45.93	29	18183	Pan-S		4.8	mainly T	ungrouped	S	S	S	S
IT3796	SRR29126929	2017	Lombardy	1	0	Not available	3115033	3059502	98.22	95	26561	Pan-S		4.1.2	Euro-American	ungrouped	S	S	S	S
IT3797	SRR29126928	2017	Lombardy	0	0	Not available	2318507	2263647	97.63	72	28362	Pan-S		4	Euro-American	ungrouped	S	S	S	S
IT3798	SRR29126927	2017	Lombardy	0	0	Not available	2147094	2120450	98.76	66	16901	Pan-S		4.8	mainly T	group_75	S	S	S	S
IT3799	SRR29126925	2017	Lombardy	1	0	Not available	2465945	2424115	98.3	75	17430	Pan-S		1.2.1	EAI Manila	ungrouped	S	S	S	S
IT3800	SRR29126924	2017	Lombardy	1	0	Not available	2953430	2846198	96.37	80	12361	Pan-S		4.1.2.1	Haarlem	group_26	S	S	S	S
IT3802	SRR29126923	2017	Lombardy	1	1	Not available	2672513	2633008	98.52	82	31201	Pan-S		4.1.2.1	Haarlem	group_243	S	S	S	S
IT3803	SRR29126453	2017	Lombardy	0	0	Not available	3984346	3932845	98.71	124	22578	Pan-S		4.8	mainly T	ungrouped	S	S	S	S
IT3804	SRR29126452	2017	Lombardy	0	0	Not available	4069070	4025469	98.93	128	32364	MDR	embB:Tyr319Ser, fabG1_ups:C-15T- 1673425, katG:Ser315Thr, rpoB:Ser450Leu , rrs:1472359_A>C_SNP	4.3.3	LAM	ungrouped	R	R	S	S
IT3805	SRR29126451	2017	Lombardy	1	0	Not available	2366450	2306435	97.46	73	15556	Pan-S		1.2.1	EAI Manila	group_25	S	S	S	S
IT3806	SRR29126450	2017	Lombardy	1	0	Not available	1960912	1901292	96.96	47	13502	Pan-S		4.2.2	Euro-American	ungrouped	S	S	S	S
IT3807	SRR29126449	2017	Lombardy	0	0	Not available	4358119	4275865	98.11	133	10848	Pan-S		4.1.2.1	Haarlem	group_243	S	S	S	S
IT3808	SRR29126448	2017	Lombardy	1	0	Not available	2327203	2282902	98.1	68	24206	Pan-S		4.3.3	LAM	ungrouped	S	S	S	S
IT3809	SRR29126447	2017	Lombardy	1	0	Not available	4074737	3977033	97.6	109	11778	Pan-S		1.2.1	EAI Manila	group_55	S	S	S	S
IT3810	SRR29126445	2017	Lombardy	1	0	Not available	3297312	3226064	97.84	88	24807	Pan-S		4.3.3	LAM	ungrouped	S	S	S	S
IT3811	SRR29126444	2017	Lombardy	0	0	Not available	3251761	3177257	97.71	81	13237	Other	rrs:1472337_C>T_SNP	4.3.2	LAM	ungrouped	S	S	S	S
IT3812	SRR29126443	2017	Lombardy	1	0	Not available	3328897	3227272	96.95	85	9796	Pan-S		4.1.2	Euro-American	group_203	S	S	S	S
IT3813	SRR29126442	2017	Lombardy	1	0	Not available	3491429	3409420	97.65	94	31330	Pan-S		4.6.2.2	Cameroon	ungrouped	S	S	S	S
IT3814	SRR29126441	2017	Lombardy	1	1	Not available	3736601	3607054	96.53	94	20581	Pan-S		4.1.2.1	Haarlem	ungrouped	S	S	S	S
IT3815	SRR29126440	2017	Lombardy	0	0	Not available	2183177	2154855	98.7	68	40275	Pan-S		4.7	mainly T	ungrouped	S	S	S	S
IT3817	SRR29126439	2017	Lombardy	1	0	Not available	3515757	3440980	97.87	83	10471	Pan-S		4.8	mainly T	group_86	S	S	S	S
IT3818	SRR29126438	2017	Lombardy	0	0	Not available	4124379	4038992	97.93	121	29803	Pan-S		4.1.2.1	Haarlem	group_73	S	S	S	S
IT3819	SRR29126437	2017	Lombardy	1	0	Not available	3996173	3906551	97.76	107	12495	Pan-S		4.8	mainly T	ungrouped	S	S	S	S
IT3820	SRR29126436	2017	Lombardy	1	0	Not available	4356241	4257087	97.72	116	31925	MDR	katG: Ser315Thr, rpoB:Leu452Pro, rpsL:Lys43Arg	2.2.1	Beijing	group_17	R	R	S	S
IT3821	SRR29126433	2017	Lombardy	1	0	Not available	3614570	3500304	96.84	102	40851	Mono-Rif	rpoB:His445Asp	4.6.2.2	Cameroon	ungrouped	S	R	S	S
IT3822	SRR29126432	2017	Lombardy	1	0	Not available	2660365	2579709	96.97	73	13053	Pan-S		1.2.1	EAI Manila	group_55	S	S	S	S
IT3824	SRR29126431	2017	Lombardy	0	0	Not available	2518706	2461797	97.74	58	31410	Pan-S		4.3.3	LAM	ungrouped	S	S	S	S
IT3826	SRR29126430	2017	Lombardy	1	0	Not available	2838573	2791599	98.35	80	18953	Pan-S		4.8	mainly T	group_96	S	S	S	S
IT3827	SRR29126429	2017	Lombardy	0	0	Not available	3577274	3526905	98.59	111	52977	Pan-S		4.3.4.2	LAM	ungrouped	S	S	S	S
IT3828	SRR29126428	2017	Lombardy	0	0	Not available	3176928	3123857	98.33	95	29556	Pan-S		4.1.2.1	Haarlem	ungrouped	S	S	S	S
IT3829	SRR31008341	2017	Lombardy	0	0	Not available	3116325	3030272	97.24	85	77350	Other	pncA:His57Asp	M. bovis	M. bovis	ungrouped	S	S	S	R
IT3830	SRR29126427	2017	Lombardy	0	0	Not available	3573205	3518164	98.46	109	11417	Pan-S		4.8	mainly T	ungrouped	S	S	S	S
IT3831	SRR29126426	2017	Lombardy	0	1	Not available	3270627	3218710	98.41	94	15867	Pan-S		4.4.1.1	S-type	group_175	S	S	S	S
IT3832	SRR29126425	2017	Lombardy	1	1	Not available	5500402	5422286	98.58	166	11207	Pan-S		3	Delhi-CAS	ungrouped	S	S	S	S
IT3834	SRR31008340	2017	Lombardy	1	1	Not available	5394264	5190932	96.23	157	22120	Pan-S		4.1.1.1	X-type	group_7	S	S
IT3835	SRR29126424	2017	Lombardy	1	1	Not available	5627474	5538278	98.41	176	25675	Pan-S		4.1.1	X-type	ungrouped	S	S	S	S
IT3836	SRR29126422	2017	Lombardy	1	0	Not available	6374452	6274969	98.44	199	17737	Pan-S		4.1.2.1	Haarlem	ungrouped	S	S	S	S
IT3837	SRR29126421	2017	Lombardy	1	1	Not available	3948536	3825777	96.89	105	17662	Pan-S		4.6	Euro-American	ungrouped	S	S	S	S
IT3838	SRR29126420	2017	Lombardy	1	0	Not available	5547075	5453920	98.32	167	11004	Pan-S		3	Delhi-CAS	ungrouped	S	S	S	S
IT3839	SRR29126419	2017	Lombardy	0	1	Not available	3736412	3669004	98.2	114	14473	Mono-INH	fabG1_ups:C-15T- 1673425	1.2.1	EAI Manila	ungrouped	R	S	S	S
IT3841	SRR29126418	2017	Lombardy	0	1	Not available	1092046	1068208	97.82	32	28672	Pan-S		4.1.2.1	Haarlem	ungrouped	S	S	S	S
IT3842	SRR29126201	2017	Lombardy	1	0	Not available	2755446	2708596	98.3	86	17115	Pan-S		4.2.1	Ural	group_10	S	S	S	S
IT3843	SRR29126200	2017	Lombardy	1	1	Not available	3790621	3699590	97.6	111	32724	Pan-S		2.2.1	Beijing	ungrouped	S	S	S	S
IT3845	SRR29126199	2017	Lombardy	1	0	Not available	3577555	3512336	98.18	108	18923	Pan-S		4.1.2.1	Haarlem	ungrouped	S	S	S	S
IT3846	SRR29126198	2017	Lombardy	1	1	Not available	4145777	4035537	97.34	123	12484	Pan-S		1.2.1	EAI Manila	ungrouped	S	S	S	S
IT3847	SRR29126197	2017	Lombardy	1	0	Not available	2199234	2161021	98.26	66	21735	Pan-S		4.1.2	Euro-American	ungrouped	S	S	S	S
IT3848	SRR29126195	2017	Lombardy	1	1	Not available	1954332	1916305	98.05	54	25219	Pan-S		4.4.1.1	S-type	ungrouped	S	S	S	S
IT3849	SRR29126194	2017	Lombardy	1	0	Not available	3383583	3318761	98.08	102	19903	Pan-S		3	Delhi-CAS	ungrouped	S	S	S	S
IT3850	SRR29126193	2017	Lombardy	1	0	Not available	5546187	5421391	97.75	167	17814	Pan-S		4.1.2.1	Haarlem	ungrouped	S	S	S	S
IT3851	SRR29126192	2017	Lombardy	1	1	Not available	4311905	4246354	98.48	134	30526	Pan-S		4.1.2.1	Haarlem	ungrouped	S	S	S	S
IT3853	SRR29126191	2017	Lombardy	0	1	Not available	5723092	5630651	98.38	176	28506	Pan-S		4.3.3	LAM	ungrouped	S	S	S	S
IT3854	SRR29126190	2017	Lombardy	1	0	Not available	5180146	5095658	98.37	160	14523	Pan-S		4.8	mainly T	ungrouped	S	S	S	S
IT3855	SRR29126189	2017	Lombardy	1	1	Not available	3997319	3923828	98.16	119	14660	Pan-S		3	Delhi-CAS	ungrouped	S	S	S	S
IT3856	SRR29126188	2017	Lombardy	1	0	Not available	3109470	3047241	98	92	19543	Pan-S		4.1.2.1	Haarlem	ungrouped	S	S	S	S
IT3857	SRR29126187	2017	Lombardy	1	0	Not available	5980478	5880490	98.33	184	24316	Mono-INH	fabG1_ups:C-15T- 1673425	4.8	mainly T	ungrouped	R	S	S	S
IT3858	SRR29126186	2017	Lombardy	1	0	Not available	1941286	1897568	97.75	53	27337	Pan-S		4.1.2.1	Haarlem	group_224	S	S	S	S
IT3859	SRR29126184	2017	Lombardy	1	1	Not available	3904777	3827743	98.03	117	20766	Pan-S		4.2.2	Euro-American	ungrouped	S	S	S	S
IT3860	SRR29126183	2017	Lombardy	1	0	Not available	5578737	5489725	98.4	172	15841	Pan-S		4.8	mainly T	ungrouped	S	S	S	S
IT3861	SRR29126182	2017	Lombardy	1	0	Not available	3032596	2955389	97.45	90	54477	Pan-S		6	West-Africa 2	ungrouped	S	S	S	S
IT3880	SRR29126181	2017	Lombardy	1	1	Not available	2603125	2558842	98.3	76	18698	Mono-INH	katG:Ser315Thr	4.1.1.3	X-type	ungrouped	R	S	S	S
IT3886	SRR29126180	2017	Lombardy	1	1	Not available	2172504	2120112	97.59	65	21923	Pan-S		4.1.2.1	Haarlem	ungrouped	S	S	S	S
IT3887	SRR29126179	2017	Lombardy	1	0	Not available	2405117	2322643	96.57	64	18124	Pan-S		3	Delhi-CAS	group_254	S	S	S	S
IT3888	SRR29126178	2017	Lombardy	1	0	Not available	1721696	1681053	97.64	53	28864	Poly-resistant	fabG1_ups:G-17T- 1673423, katG:Ser315Thr, pncA:Asp12Asn	4.3.3	LAM	ungrouped	R	S	S	R
IT3889	SRR29126177	2017	Lombardy	0	0	Not available	6482387	1755330	27.08	54	26247	pre_XDR	embB:Met306Ile, fabG1_ups:C-15T- 1673425, gyrA: Asp94Tyr, katG:Ser315Thr, pncA:Ala146Val, rpoB:Ser450Leu	4.8	mainly T	group_230	R	R	R	R
IT3890	SRR29126176	2017	Lombardy	0	0	Not available	1773632	1712183	96.54	48	30058	Pan-S		4.1.1.1	X-type	ungrouped	S	S	S	S
IT3891	SRR29126175	2017	Lombardy	1	0	Not available	3185711	3101616	97.36	86	15290	Pan-S		3.1.2	Delhi-CAS	group_238	S	S	S	S
IT3893	SRR29126173	2017	Lombardy	1	0	Not available	3147067	3014413	95.78	89	14155	Pan-S		3	Delhi-CAS	ungrouped	S	S	S	S
IT3894	SRR29126172	2017	Lombardy	1	0	Not available	4375341	4233266	96.75	118	19918	Pan-S		4.8	mainly T	ungrouped	S	S	S	S
IT3895	SRR29126171	2017	Lombardy	1	1	Not available	3293570	3211695	97.51	95	8097	Pan-S		4.8	mainly T	ungrouped	S	S	S	S
IT3896	SRR31008339	2017	Lombardy	0	1	Not available	2830597	2769580	97.84	82	110660	Other	pncA:His57Asp	M. bovis	M. bovis	group_23	S	S	S	R
IT3897	SRR29126170	2017	Lombardy	1	1	Not available	3625491	3552179	97.98	106	12253	Pan-S		4.1.2.1	Haarlem	ungrouped	S	S	S	R
IT3898	SRR29126169	2017	Lombardy	1	0	Not available	7573574	7460199	98.5	237	26476	Pan-S		4.3	LAM	ungrouped	S	S	S	S
IT3899	SRR29126168	2017	Lombardy	0	0	Not available	3496301	3375233	96.54	97	33049	Pan-S		4.1.2.1	Haarlem	group_2	S	S	S	S
IT3900	SRR29126167	2017	Lombardy	1	0	Not available	6063798	5934550	97.87	179	17659	MDR	katG: Ser315Thr, rpoB:Leu452Pro	1.2.1	EAI Manila	group_125	R	R	S	S
IT3901	SRR29126166	2017	Lombardy	1	0	Not available	7047466	6931603	98.36	226	22028	Pan-S		4.1.2.1	Haarlem	ungrouped	S	S	S	S
IT3902	SRR29126577	2017	Lombardy	1	0	Not available	2732897	2669751	97.69	76	27739	Pan-S		4.3.3	LAM	ungrouped	S	S	S	S
IT3903	SRR29126576	2017	Lombardy	0	1	Not available	1774327	1742058	98.18	52	14405	Pan-S		4.8	mainly T	ungrouped	S	S	S	S
IT3904	SRR29126574	2017	Lombardy	1	0	Not available	6008100	5926167	98.64	190	18043	Pan-S		4.8	mainly T	ungrouped	S	S	S	S
IT3905	SRR29126573	2017	Lombardy	1	0	Not available	3842671	3720303	96.82	104	28945	Pan-S		4.1.2.1	Haarlem	ungrouped	S	S	S	S
IT3910	SRR29126572	2017	Lombardy	1	0	Not available	5078015	5002145	98.51	158	24943	Poly-resistant	katG:Ser315Thr, rpsL:Lys43Arg	4.8	mainly T	ungrouped	R	S	s	s		R
IT3911	SRR29126571	2017	Lombardy	1	0	Not available	2500945	2469580	98.75	78	28131	Pan-S		4.3.3	LAM	ungrouped	S	S	S	S
IT3912	SRR29126570	2017	Lombardy	1	1	Not available	2323809	2292560	98.66	72	23052	Pan-S		4.1.2.1	Haarlem	ungrouped	S	S				S
IT3913	SRR29126569	2017	Lombardy	1	0	Not available	4820370	4762360	98.8	149	15767	Other	rrs:1472337_C>T_SNP	4.3.2	LAM	ungrouped	S	S	S	S
IT3915	SRR29126568	2017	Lombardy	1	1	Not available	1039475	1022921	98.41	31	39299	Pan-S		4.1.2.1	Haarlem	ungrouped	S	S	S	S
IT3916	SRR29126567	2017	Lombardy	1	1	Not available	2613276	2573956	98.5	80	24118	Pan-S		4.1.2.1	Haarlem	ungrouped	S	S	S	S
IT3917	SRR29126566	2017	Lombardy	1	0	Not available	1473767	1442967	97.91	39	52922	Pan-S		4.3.4.2	LAM	ungrouped	S	S	S	S
IT3918	SRR31008337	2017	Lombardy	1	1	Not available	2003767	1961461	97.89	53	23782	Pan-S		4.1.1.1	X-type	group_7	S	S
IT3919	SRR29126565	2017	Lombardy	1	0	Not available	1702534	1669414	98.05	48	33781	Pan-S		4.1.2.1	Haarlem	ungrouped	S	S	S	S
IT3920	SRR29126563	2017	Lombardy	1	0	Not available	1409456	1380999	97.98	39	16065	Pan-S		1.2.1	EAI Manila	ungrouped	S	S	S	S
IT3921	SRR29126562	2017	Lombardy	0	0	Not available	1154716	1131071	97.95	31	20046	Pan-S		4.1.2.1	Haarlem	ungrouped	S	S	S	S
IT3923	SRR29126561	2017	Lombardy	1	1	Not available	1919448	1890175	98.47	59	40598	Pan-S		2.2.1	Beijing	group_77	S	S	S	S
IT3924	SRR29126560	2017	Lombardy	1	1	Not available	2821895	2775223	98.35	82	55037	Pan-S		4.3.4.2	LAM	group_177	S	S	S	S
IT3927	SRR29126559	2017	Lombardy	1	0	Not available	2119155	2095442	98.88	66	14469	Pan-S		4.8	mainly T	ungrouped	S	S	S	S
IT3928	SRR29126558	2017	Lombardy	1	0	Not available	4713215	4630380	98.24	139	11542	Pan-S		4.1	Euro-American	ungrouped	S	S	S	S
IT3930	SRR29126557	2017	Lombardy	1	1	Not available	1811103	1788431	98.75	57	52814	Pan-S		4.6.2.2	Cameroon	ungrouped	S	S	S	S
IT3931	SRR29126556	2017	Lombardy	1	0	Not available	2952169	2918363	98.85	92	31578	Mono-INH	fabG1_ups:C-15T- 1673425	4.7	mainly T	ungrouped	R	S	S	S
IT3932	SRR29126555	2017	Lombardy	0	0	Not available	2251165	2225579	98.86	70	69114	Pan-S		4.3.4.2	LAM	group_257	S	S	S	S
IT3933	SRR29126554	2017	Lombardy	1	0	Not available	1662279	1626665	97.86	44	9280	Pan-S		3	Delhi-CAS	group_163	S	S	S	S
IT3934	SRR29126552	2017	Lombardy	1	0	Not available	3332809	3290435	98.73	73	23544	Pan-S		4.3.3	LAM	ungrouped	S	S	S	S
IT3935	SRR29126551	2017	Lombardy	1	0	Not available	2398437	2365645	98.63	67	15333	Pan-S		4.6	Euro-American	ungrouped	S	S	S	S
IT3936	SRR29126550	2017	Lombardy	1	0	Not available	2771294	2732223	98.59	80	20971	Pan-S		4.1.2.1	Haarlem	ungrouped	S	S	S	S
IT3937	SRR29126549	2017	Lombardy	1	0	Not available	4622669	4563348	98.72	142	21320	Pan-S		4.3.1	LAM	ungrouped	S	S	S	S
IT3938	SRR29126548	2017	Lombardy	1	0	Not available	3000045	2951030	98.37	82	9029	Poly-resistant	katG: Ser315Thr, rpsL:Lys43Arg	3	Delhi-CAS	group_244	R	S	S	S
IT3940	SRR29126547	2017	Lombardy	1	0	Not available	1154324	1127258	97.66	31	24420	Pan-S		4.6.2	Euro-American	group_217	S	S	S	S
IT3941	SRR29126546	2017	Lombardy	1	0	Not available	3161155	3095629	97.93	95	48667	Pan-S		6	West-Africa 2	ungrouped	S	S	S	S
IT3942	SRR29126545	2017	Lombardy	1	1	Not available	2630370	2589309	98.44	80	21579	Pan-S		3.1.2	Delhi-CAS	group_238	S	S	S	S
IT3943	SRR29126544	2017	Lombardy	1	0	Not available	3104978	3055393	98.4	95	27401	Pan-S		4.3.3	LAM	group_140	S	S	S	S
IT3944	SRR29126543	2017	Lombardy	0	0	Not available	3295363	3257163	98.84	103	29445	Pan-S		4.7	mainly T	ungrouped	S	S	S	S
IT3945	SRR29126922	2017	Lombardy	0	0	Not available	2585552	2554532	98.8	81	28070	Pan-S		4.4.1.1	S-type	ungrouped	S	S	S	S
IT3947	SRR29126921	2017	Lombardy	1	0	Not available	3703207	3658597	98.8	116	31969	Pan-S		4.1.2.1	Haarlem	ungrouped	S	S	S	S
IT3948	SRR29126920	2017	Lombardy	1	0	Not available	1992003	1951293	97.96	54	20160	Pan-S		3	Delhi-CAS	group_254	S	S	S	S
IT3950	SRR29126919	2017	Lombardy	1	0	Not available	4554681	4503416	98.87	143	21404	Pan-S		4.8	mainly T	group_190	S	S	S	S
IT3951	SRR29126918	2017	Lombardy	1	0	Not available	958642	943460	98.42	27	54010	Pan-S		4.6.2.2	Cameroon	ungrouped	S	S	S	S
IT3952	SRR29126917	2017	Lombardy	0	0	Not available	3995148	3943618	98.71	126	26290	Pan-S		4.1.2.1	Haarlem	group_15	S	S	S	S
IT3953	SRR29126916	2017	Lombardy	1	0	Not available	4144455	4100427	98.94	129	52007	Pan-S		4.6.2.2	Cameroon	ungrouped	S	S	S	S
IT3954	SRR29126915	2017	Lombardy	0	0	Not available	1573914	1550073	98.49	47	35740	Pan-S		4.1.2.1	Haarlem	ungrouped	S	S	S	S
IT3956	SRR29126914	2017	Lombardy	1	0	Not available	4605243	4516663	98.08	140	40962	Pan-S		4.1.2.1	Haarlem	ungrouped	S	S	S	S
IT3957	SRR29126913	2017	Lombardy	1	1	Not available	2710861	2651918	97.83	76	18663	Pan-S		4.1.2.1	Haarlem	group_85	S	S	S	S
IT3958	SRR29126911	2017	Lombardy	1	0	Not available	6814900	6699987	98.31	206	17848	Pan-S		4.8	mainly T	ungrouped	S	S	S	S
IT3959	SRR29126910	2017	Lombardy	1	1	Not available	4529219	4436328	97.95	126	18450	Pan-S		4.1	Euro-American	ungrouped	S	S	S	S
IT3961	SRR29126909	2017	Lombardy	1	0	Not available	4600579	4520996	98.27	143	23049	Pan-S		4.1.2.1	Haarlem	ungrouped	S	S	S	S
IT3962	SRR29126908	2017	Lombardy	1	0	Not available	3533227	3461455	97.97	102	17218	Pan-S		4.1.2.1	Haarlem	ungrouped	S	S	S	S
IT3963	SRR29126907	2017	Lombardy	1	1	Not available	3786733	3719713	98.23	115	26867	Other	rrs:1472337_C>T_SNP	4.3.2	LAM	ungrouped	S	S	S	S
IT3965	SRR29126906	2017	Lombardy	1	1	Not available	1199230	1125664	93.87	31	38553	Pan-S		2.2.1	Beijing	group_212	S	S	S	S
IT3966	SRR29126905	2017	Lombardy	1	1	Not available	3200055	3136437	98.01	89	17132	Pan-S		4.1.2.1	Haarlem	group_85	S	S	S	S
IT3968	SRR29126904	2017	Lombardy	1	0	Not available	1470227	1432920	97.46	34	14016	Pan-S		4.3.1	LAM	ungrouped	S	S	S	S
IT3969	SRR29126903	2017	Lombardy	1	1	Not available	3317790	3252335	98.03	92	9575	Mono-INH	fabG1_ups:C-15T- 1673425	3.1.2.1	Delhi-CAS	ungrouped	R	S	S	S
IT3970	SRR29126902	2017	Lombardy	1	0	Not available	1374145	1346750	98.01	38	40106	Pan-S		4.3.4.1	LAM	ungrouped	S	S	S	S
IT3972	SRR29126899	2017	Lombardy	1	0	Not available	3626870	3480232	95.96	96	23458	Pan-S		4.1.2.1	Haarlem	ungrouped	S	S	S	S
IT3973	SRR29126898	2017	Lombardy	1	0	Not available	3270758	3196776	97.74	94	10882	Pan-S		4.1.2	Euro-American	group_203	S	S	S	S
IT3974	SRR29126897	2017	Lombardy	Not available	0	Not available	2105945	2070519	98.32	62	36545	Pan-S		2.2.1	Beijing	ungrouped	S	S	S	S
IT3975	SRR29126896	2017	Lombardy	1	0	Not available	3510693	3451191	98.31	108	29750	Pan-S		4.1.2.1	Haarlem	group_32	S	S	S	S
IT3976	SRR29126895	2017	Lombardy	1	0	Not available	1936435	1899950	98.12	57	20564	Mono-INH	katG:Ser315Thr	3	Delhi-CAS	ungrouped	R	S	S	S
IT3977	SRR29126894	2017	Lombardy	0	0	Not available	2611925	2569647	98.38	76	55406	Pan-S		4.3.4.2	LAM	ungrouped	S	S	S	S
IT3978	SRR29126893	2017	Lombardy	1	0	Not available	1399770	1364480	97.48	40	34073	Pan-S		5	West-Africa 1	ungrouped	S	S	S	S
IT3979	SRR29126892	2017	Lombardy	0	0	Not available	1241031	1218317	98.17	36	32949	Other	gid:Ala138Val	4.4.1.1	S-type	ungrouped	S	S	S	S
IT3980	SRR29126891	2017	Lombardy	0	1	Not available	1975650	1941424	98.27	59	19728	Pan-S		4.9	H37Rv-like	ungrouped	S	S	S	S
IT3981	SRR29126890	2017	Lombardy	0	0	Not available	2613923	2568656	98.27	79	21241	Pan-S		4.8	mainly T	ungrouped	S	S	S	S
IT3982	SRR29126888	2017	Lombardy	1	0	Not available	3481886	3415654	98.1	102	29972	Pan-S		4.1.2.1	Haarlem	group_32	S	S	S	S
IT3983	SRR29126887	2017	Lombardy	0	0	Not available	4388314	4313202	98.29	132	13798	Pan-S		4.8	mainly T	group_99	S	S	S	S
IT3984	SRR29126417	2017	Lombardy	0	0	Not available	3450217	3404884	98.69	108	15814	Pan-S		4.8	mainly T	group_99	S	S	S	S
IT3985	SRR29126416	2017	Lombardy	1	0	Not available	2409041	2366694	98.24	73	16573	Pan-S		4.1.2	Euro-American	ungrouped	S	S	S	S
IT3986	SRR29126415	2017	Lombardy	1	1	Not available	2314698	2273454	98.22	69	19204	Pan-S		3	Delhi-CAS	ungrouped	S	S	S	S
IT3988	SRR29126414	2017	Lombardy	1	0	Not available	4231467	4181044	98.81	134	24149	Pan-S		4.3.3	LAM	group_184	S	S	S	S
IT3989	SRR29126413	2017	Lombardy	1	0	Not available	2005576	1974151	98.43	62	37085	Pan-S		4.6.2.2	Cameroon	ungrouped	S	S	S	S
IT3990	SRR29126412	2017	Lombardy	1	0	Not available	7146773	7036046	98.45	224	43475	Pan-S		4.6.2.2	Cameroon	ungrouped	S	S	S	S
IT3991	SRR29126411	2017	Lombardy	1	0	Not available	3782615	3713684	98.18	111	23052	Mixed (Pan-S/RR)	rpoB:L452P (23.7%)	4.3.3	LAM	group_116	S	R	S	S
IT3994	SRR29126410	2017	Lombardy	1	0	Not available	3244080	3194675	98.48	102	37971	Pan-S		4.1.2.1	Haarlem	group_2	S	S	S	S
IT3995	SRR29126408	2017	Lombardy	1	0	Not available	1339220	1226809	91.61	36	54345	Pan-S		4.6.2.2	Cameroon	group_246	S	S	S	S
IT3996	SRR29126407	2017	Lombardy	1	0	Not available	2484445	2433370	97.94	75	50867	Pan-S		4.6.2.2	Cameroon	group_228	S	S	S	S
IT3997	SRR29126406	2017	Lombardy	1	0	Not available	2949344	1839386	62.37	48	39809	Pan-S		4.6.2.1	Euro-American	ungrouped	S	S	S	S
IT3999	SRR29126405	2017	Lombardy	1	0	Not available	2401605	2363071	98.4	73	71214	Pan-S		4.3.4.2	LAM	group_257	S	S	S	S
IT4000	SRR29126404	2017	Lombardy	1	0	Not available	2325554	2266150	97.45	64	20643	MDR	katG:Ser315Thr, pncA:Phe94Cys, rpoB:Ser450Leu	4.2.2	Euro-American	ungrouped	R	R	S	R			S	S			S
IT4001	SRR31008336	2017	Lombardy	1	0	Not available	1043830	1023929	98.09	32	56933	Pan-S		1.1.1	EAI	group_81	S	S	S	R
IT4002	SRR29126403	2017	Lombardy	1	0	Not available	2489391	2456580	98.68	78	16682	MDR	fabG1_ups:C-15T- 1673425, rpoB:Ser450Leu	4.8	mainly T	ungrouped	R	R	S	S			S	S			S
IT4003	SRR29126402	2017	Lombardy	1	1	Not available	4410834	3190961	72.34	101	14661	Pan-S		4.1	Euro-American	ungrouped	S	S	S	S
IT4004	SRR29126401	2017	Lombardy	1	1	Not available	858580	844078	98.31	25	36117	Pan-S		3	Delhi-CAS	ungrouped	S	S	S	S
IT4005	SRR29126400	2017	Lombardy	1	1	Not available	4586465	4531430	98.8	144	15199	Pan-S		4.1.2.1	Haarlem	ungrouped	S	S	S	S
IT4006	SRR29126399	2017	Lombardy	1	0	Not available	2888197	2846599	98.56	87	9904	Mono-INH	katG:Ser315Thr	3.1.2	Delhi-CAS	ungrouped	R	S	S	S
IT4007	SRR29126397	2017	Lombardy	1	0	Not available	3259880	3215366	98.63	97	47378	Pan-S		4.6.2.2	Cameroon	ungrouped	S	S	S	S
IT4008	SRR29126396	2017	Lombardy	1	1	Not available	3735938	3677691	98.44	117	27026	Pan-S		4.1.1	X-type	group_218	S	S	S	S
IT760	SRR31008335	2018	Emilia-Romagna	1	0	Not available	3296987	3256178	98.76	101		MDR	embB:Ser297Ala , fabG1_ups:C-15T- 1673425, katG:Ser315Thr, rpoB:Ser450Leu, rpsL:Lys88Arg	4.2.1	Ural	group_95	R	R	S	R
IT761	SRR31008334	2018	Emilia-Romagna	1	0	Not available	2706847	2679356	98.98	84		MDR	embB:Met306Ile, fabG1_ups:C-15T- 1673425, katG:Ser315Thr, pncA:Ala146Val, rpoB:Ser450Leu	4.8	mainly T	ungrouped	R	R	S	R
IT957	SRR29126149	2018	Lombardy	0	0	Not available	3520536	3492328	99.2	103	41121	Pan-S		2.2.1	Beijing	group_212	S	S	S	S
IT958	SRS12235629	2018	Lombardy	0	0	Not available	2486825	2461230	98.97	76	80457	Other	pncA:His57Asp	M. bovis	M. bovis	ungrouped	S	S	S	R
IT959	SRR29126343	2018	Lombardy	1	0	Not available	2778013	2756005	99.21	87	16582	Pan-S		4.1.1	X-type	ungrouped	S	S	S	S
IT960	SRR29127093	2018	Lombardy	1	0	Not available	2785708	2761025	99.11	80	23163	Other	gid:Val65Gly	3	Delhi-CAS	ungrouped	S	S	S	S
IT961	SRR29127071	2018	Lombardy	1	0	Not available	3116176	3085357	99.01	92	13793	Pan-S		3	Delhi-CAS	ungrouped	S	S	S	S
IT964	SRR29126833	2018	Lombardy	1	0	Not available	3221544	3192234	99.09	96	31363	Pan-S		4.1.2.1	Haarlem	ungrouped	S	S	S	S
IT965	SRR31008333	2018	Lombardy	0	0	Not available	3246506	3217266	99.1	97	117756	Other	pncA:His57Asp	M. bovis	M. bovis	group_23	S	S	S	R
IT966	SRR29126734	2018	Lombardy	1	0	Not available	3098126	3062988	98.87	92	31685	Pan-S		1.1.3	EAI	ungrouped	S	S	S	S
IT967	SRR29126745	2018	Lombardy	1	0	Not available	2696955	2670257	99.01	79	27310	Pan-S		4.1.1.3	X-type	group_162	S	S	S	S
IT968	SRR29126709	2018	Lombardy	1	0	Not available	3708197	3676761	99.15	115	9941	Pan-S		4.8	mainly T	ungrouped	S	S	S	S
IT969	SRR29127046	2018	Lombardy	1	0	Not available	2099816	2078497	98.98	61	24367	Pan-S		3.1.2.1	Delhi-CAS	ungrouped	S	S	S	S
IT970	SRR29126723	2018	Lombardy	1	0	Not available	2788228	2766880	99.23	84	27359	Pan-S		4.1.1.3	X-type	group_162	S	S	S	S
IT971	SRR29126319	2018	Lombardy	1	0	Not available	3582905	3533163	98.61	108	30098	Pan-S		4.1.2.1	Haarlem	group_80	S	S	S	S
IT972	SRR29126720	2018	Lombardy	1	0	Not available	3795342	3753948	98.91	105	7956	Pan-S		4.8	mainly T	ungrouped	S	S	S	S
IT977	SRR29126648	2017	Lombardy	1	0	Not available	2102050	2082314	99.06	65	39838	Pan-S		1.1.3	EAI	ungrouped	S	S	S	S
IT978	SRR31008332	2017	Lombardy	0	1	Not available	3789232	3757640	99.17	121	108161	Other	pncA:His57Asp	M. bovis	M. bovis	group_48	S	S	S	R
IT979	SRR29126636	2017	Lombardy	1	0	Not available	3092204	3044943	98.47	87	38570	Pan-S		1.1.1	EAI	group_81	S	S	S	R
IT980	SRR29126625	2018	Lombardy	1	0	Not available	2922367	2886856	98.78	82	15906	MDR	fabG1_ups:T-8A- 1673432, katG:Ser315Thr, pncA:His57Tyr, rpoB:Asp435Val	4.1	Euro-American	ungrouped	R	R	S	R
IT981	SRR29126614	2018	Lombardy	1	0	Not available	3371442	3316626	98.37	92	20145	Pan-S		4.1.2.1	Haarlem	ungrouped	S	S	S	S
IT982	SRR29126984	2018	Lombardy	0	0	Not available	2015778	1994869	98.96	58	37174	Pan-S		1.2.1	EAI Manila	ungrouped	S	S	S	S
IT983	SRR29126973	2018	Lombardy	0	0	Not available	2693803	2674818	99.3	83	27426	Pan-S		4.7	mainly T	ungrouped	S	S	S	S
IT984	SRR29126962	2018	Lombardy	1	0	Not available	2284709	2268285	99.28	64	20918	Pan-S		4.4.1.1	S-type	ungrouped	S	S	S	S
IT985	SRR29126771	2018	Lombardy	1	1	Not available	2287597	2263137	98.93	71	59159	Pan-S		6	West-Africa 2	ungrouped	S	S	S	S
IT986	SRR29126507	2018	Lombardy	1	0	Not available	3723954	3677833	98.76	101	16153	Pan-S		4.8	mainly T	ungrouped	S	S	S	S
IT987	SRR29126460	2018	Lombardy	1	0	Not available	3960676	3877143	97.89	113	12359	Mono-INH	fabG1_ups:T-8C- 1673432	3	Delhi-CAS	ungrouped	R	S	S	S
IT988	SRR29126233	2018	Lombardy	1	0	Not available	6690743	6600249	98.65	191	19908	Pan-S		3	Delhi-CAS	ungrouped	S	S	S	S
IT989	SRR29126221	2018	Lombardy	1	1	Not available	2394956	2315595	96.69	65	18769	Pan-S		3	Delhi-CAS	ungrouped	S	S	S	S
IT990	SRR29126210	2018	Lombardy	1	0	Not available	1543618	1530883	99.17	47	36552	Pan-S		4.6.2	Euro-American	group_217	S	S	S	S
IT991	SRR29126611	2018	Lombardy	1	0	Not available	2017147	2001410	99.22	61	27241	Pan-S		4.1.2.1	Haarlem	ungrouped	S	S	S	S
IT992	SRR29126600	2018	Lombardy	1	1	Not available	3278046	3243246	98.94	101	24601	Pan-S		1.2.2	EAI	ungrouped	S	S	S	S
IT993	SRR29126589	2018	Lombardy	1	1	Not available	3557973	3470304	97.54	95	41487	Pan-S		4.6.2.2	Cameroon	ungrouped	S	S	S	S
IT995	SRR29126578	2018	Lombardy	1	0	Not available	3991095	3928569	98.43	108	20193	Pan-S		4.1.2.1	Haarlem	ungrouped	S	S	S	S
IT996	SRR29126948	2018	Lombardy	1	0	Not available	4234597	4182711	98.77	123	8224	Pan-S		4.8	mainly T	ungrouped	S	S	S	S
IT997	SRR29126937	2018	Lombardy	1	1	Not available	3128199	3102783	99.19	90	19224	Pan-S		4.8	mainly T	ungrouped	S	S	S	S
IT998	SRR29126926	2018	Lombardy	1	0	Not available	2783047	2756571	99.05	86	34527	Pan-S		4.1.2.1	Haarlem	ungrouped	S	S	S	S
IT999	SRR29126446	2018	Lombardy	1	0	Not available	3181254	3143698	98.82	100	29633	Pan-S		1.1.2	EAI	ungrouped	S	S	S	S
SRR19048528	SRR19048528	2019	Lazio	1	0	0	1268882	1262993	99.54	59	63468	Pan-S		4.8	mainly T	group_19	S	S	S	S
SRR19048529	SRR19048529	2019	Lazio	Not available	Not available	Not available	1008222	1000941	99.28	46	67843	Pan-S		2.2.1	Beijing	group_101	S	S
SRR19048530	SRR19048530	2019	Lazio	Not available	0	0	1603808	1219799	76.06	59	72980	Mono-INH	katG:Ser315Thr	4.6.2.2	Cameroon	group_45	R	S	S	S
SRR19048532	SRR19048532	2019	Lazio	1	0	0	1641511	1632960	99.48	75	36336	Pan-S		4.1.2.1	Haarlem	group_11	S	S	S	S
SRR19048533	SRR19048533	2019	Lazio	1	0	Not available	1733282	1723701	99.45	77	61523	MDR	embB:Met306Val, katG: Ser315Thr, pncA:Val7Gly, rpoB:Ser450Leu, rpsL:Lys43Arg	2.2.1	Beijing	ungrouped	R	R	R	S				R
SRR19048534	SRR19048534	2019	Lazio	1	0	0	864303	857285	99.19	39	64796	MDR	embB:Met306Val, katG:Ser315Thr, rpoB:His445Tyr His445Arg, rpsL:Lys43Arg	4	Euro-American	ungrouped	R	R	R	S
SRR19048535	SRR19048535	2019	Lazio	1	0	0	718981	708147	98.49	31	46069	Pan-S		4.1	Euro-American	group_170	S	S	S	S
SRR19048536	SRR19048536	2019	Lazio	1	0	Not available	1148540	1085228	94.49	47	51188	Pan-S		4.1.2.1	Haarlem	ungrouped	S	S	S	S
SRR19048537	SRR19048537	2019	Lazio	Not available	0	0	1481219	679606	45.88	29	61615	Pan-S		4.1.2.1	Haarlem	ungrouped	S	S	R	S
SRR19048538	SRR19048538	2019	Lazio	Not available	0	0	1987122	1977879	99.53	104	45068	Pan-S		4.8	mainly T	group_56	S	S	S	S
SRR19048539	SRR19048539	2019	Lazio	0	0	0	4376991	4360926	99.63	201	37253	Pan-S		4.8	mainly T	group_207	S	S	S	S
SRR19048540	SRR19048540	2019	Lazio	0	0	0	1703321	1686796	99.03	77	39567	Pan-S		4.1.2.1	Haarlem	group_11	S	S	S	S
SRR19048541	SRR19048541	2019	Lazio	1	0	0	1200995	1196168	99.6	53	36263	Pan-S		4.8	mainly T	ungrouped	S	S	S	S
SRR19048542	SRR19048542	2019	Lazio	Not available	0	0	611091	608310	99.54	27	39284	Pan-S		4.8	mainly T	ungrouped	S	S	S	S
SRR19048543	SRR19048543	2019	Lazio	0	0	0	1157656	1149802	99.32	52	39977	Mono-INH	fabG1_ups:G-17T- 1673423	4.1.2.1	Haarlem	ungrouped	R	S	S	S
SRR19048544	SRR19048544	2019	Lazio	1	0	0	894545	888225	99.29	40	51146	Mono-INH	fabG1_ups:C-15T- 1673425	4.8	mainly T	group_181	R	S	S	S
SRR19048545	SRR19048545	2019	Lazio	Not available	0	0	2166451	2147824	99.14	100	50140	Pan-S		4.8	mainly T	group_19	S	S	S	S
SRR19048546	SRR19048546	2019	Lazio	Not available	Not available	Not available	1347027	1342686	99.68	64	57264	Pan-S		4.4.1.2	Euro-American	group_215	S	S	S	S
SRR19048547	SRR19048547	2019	Lazio	1	0	0	780012	774993	99.36	37	77270	Pan-S		2.2.2	Beijing	ungrouped	S	S	S	S
SRR19048548	SRR19048548	2019	Lazio	1	0	0	1042889	1031954	98.95	47	61452	Pan-S		4.8	mainly T	ungrouped	S	S	S	S
SRR19048549	SRR19048549	2019	Lazio	Not available	0	1	1332627	1319477	99.01	64	55254	Other	rrs:1472337_C>T_SNP	4.3.2	LAM	ungrouped	S	S	S	S
SRR19048550	SRR19048550	2019	Lazio	Not available	0	Not available	2175487	2126713	97.76	104	53330	Pan-S		4.8	mainly T	group_206	S	S	S	S
SRR19048551	SRR19048551	2019	Lazio	1	0	0	1249745	1239268	99.16	61	58467	Pan-S		1.1.3	EAI	ungrouped	S	S	S	S
SRR19048552	SRR19048552	2019	Lazio	Not available	0	Not available	1243095	1234285	99.29	62	59221	Pan-S		4.2.2	Euro-American	group_255	S	S	S	S
SRR19048553	SRR19048553	2019	Lazio	1	1	0	1677139	1670991	99.63	76	80362	Pan-S		4.6.2.2	Cameroon	group_12	S	S	S	S
SRR19048554	SRR19048554	2019	Lazio	1	0	0	1022468	1013080	99.08	44	39191	Pan-S		4.1.2.1	Haarlem	ungrouped	S	S	S	S
SRR19048555	SRR19048555	2019	Lazio	0	0	0	1263805	1254089	99.23	60	63623	Mono-Rif	rpoB:Ser450Leu	4.3.3	LAM	ungrouped	S	R	S	S
SRR19048556	SRR19048556	2019	Lazio	0	0	0	1720945	1647621	95.74	77	48848	Pan-S		4.1.2	Euro-American	ungrouped	S	S	S	S
SRR19048557	SRR19048557	2019	Lazio	Not available	0	0	1182377	1161562	98.24	54	66449	Pan-S		4.1.2.1	Haarlem	ungrouped	S	S	S	S
SRR19048558	SRR19048558	2019	Lazio	Not available	0	Not available	1017870	1004077	98.64	46	56794	Pan-S		1.1.2	EAI	ungrouped	S	S	S	S
SRR19048559	SRR19048559	2019	Lazio	1	0	0	1962094	1951148	99.44	82	16211	Pan-S		4.8	mainly T	ungrouped	S	S	S	S
SRR19048560	SRR19048560	2018	Lazio	0	0	0	887827	836087	94.17	35	35126	Pan-S		4.4.1.1	S-type	ungrouped	S	S	S	S
SRR19048562	SRR19048562	2018	Lazio	1	0	Not available	1594716	1574997	98.76	77	48450	pre_XDR	embB:Met306Ile , gyrA: Asp94Tyr , katG:Ser315Thr , pncA:Gly105Asp, rpoB:Ser450Leu, rpsL:Lys88Arg	4.1.1.1	X-type	ungrouped	R	R	R	S
SRR19048563	SRR19048563	2019	Lazio	Not available	0	0	1672656	1660682	99.28	78	39581	Pan-S		4.8	mainly T	group_126	S	S	S	S
SRR19048564	SRR19048564	2018	Lazio	Not available	0	0	620509	591884	95.39	26	60416	Pan-S		4.3.3	LAM	ungrouped	S	S	S	S
SRR19048565	SRR19048565	2018	Lazio	1	0	0	2042647	1960371	95.97	90	64748	Pan-S		6	West-Africa 2	ungrouped	S	S	S	S
SRR19048566	SRR19048566	2018	Lazio	Not available	0	0	2047379	1866642	91.17	85	54564	Pan-S		2.2.1	Beijing	ungrouped	S	S	S	S
SRR19048567	SRR19048567	2018	Lazio	Not available	0	0	1846273	1765738	95.64	81	64557	Pan-S		4.6.2.2	Cameroon	ungrouped	S	S	S	S
SRR19048568	SRR19048568	2018	Lazio	1	0	0	722536	632397	87.52	28	40029	Pan-S		4.1.2	Euro-American	ungrouped	S	S	S	S
SRR19048569	SRR19048569	2018	Lazio	1	0	0	1070074	1021437	95.45	46	42196	Pan-S		1.2.1	EAI Manila	ungrouped	S	S	S	S
SRR19048570	SRR19048570	2018	Lazio	1	0	0	1663883	1649306	99.12	73	24584	Pan-S		4.1.1.1	X-type	ungrouped	S	S	S	S
SRR19048571	SRR19048571	2018	Lazio	1	0	0	1360239	1348993	99.17	61	33694	Pan-S		4.1	Euro-American	group_223	S	S	S	S
SRR19048572	SRR19048572	2018	Lazio	0	0	Not available	1110994	789968	71.1	35	40811	Pan-S		4.2.2	Euro-American	group_255	S	S	S	S
SRR19048573	SRR19048573	2018	Lazio	Not available	0	1	718664	715959	99.62	30	52340	MDR	embB:Tyr319Ser, katG:Ser315Thr, pncA:Gln10Arg, rpoB:Asp435Val	4.3.3	LAM	ungrouped	R	R	R	S
SRR19048574	SRR19048574	2019	Lazio	1	0	0	1161153	1142830	98.42	54	61113	Pan-S		4.1.2.1	Haarlem	ungrouped	S	S	S	S
SRR19048575	SRR19048575	2019	Lazio	1	0	0	1029902	988686	96	49	51304	Pan-S		4.1.2.1	Haarlem	ungrouped	S	S	S	S
SRR19048576	SRR19048576	2018	Lazio	0	0	0	697100	569932	81.76	27	60047	Pan-S		4.8	mainly T	ungrouped	S	S	S	S
SRR19048577	SRR19048577	2018	Lazio	1	1	0	1384989	1377600	99.47	61	41966	Pan-S		4.1.2	Euro-American	group_220	S	S	S	S
SRR19048578	SRR19048578	2018	Lazio	Not available	0	0	1874805	1853539	98.87	98	72537	Pan-S		2.2.1	Beijing	group_101	S	S	S	S
SRR19048579	SRR19048579	2018	Lazio	0	0	0	1970379	1961804	99.56	111	78317	Pan-S		4.4.1.2	Euro-American	group_215	S	S	S	S
SRR19048580	SRR19048580	2018	Lazio	Not available	0	Not available	1170628	1161603	99.23	60	52781	Pan-S		3	Delhi-CAS	ungrouped	S	S	S	S
SRR19048583	SRR19048583	2018	Lazio	1	0	0	1096735	1087089	99.12	55	91161	Pan-S		2.2.1	Beijing	group_166	S	S	S	S
SRR19048584	SRR19048584	2018	Lazio	Not available	0	0	1583576	1576026	99.52	84	52957	Pan-S		4.4.1.1	S-type	ungrouped	S	S	S	S
SRR19048585	SRR19048585	2018	Lazio	0	0	0	1332583	1318271	98.93	69	69617	Pan-S		4.2.2	Euro-American	group_255	S	S	S	S
SRR19048586	SRR19048586	2019	Lazio	0	0	0	2332957	2316130	99.28	108	32049	Pan-S		4.1.2	Euro-American	ungrouped	S	S	S	S
SRR19048587	SRR19048587	2018	Lazio	Not available	0	Not available	1428039	1417265	99.25	77	66450	Pan-S		4.8	mainly T	ungrouped	S	S	S	S
SRR19048588	SRR19048588	2018	Lazio	Not available	0	0	1431868	1422561	99.35	77	57218	Pan-S		3	Delhi-CAS	ungrouped	S	S	S	S
SRR19048589	SRR19048589	2018	Lazio	1	0	0	1321382	1313270	99.39	63	51429	Mono-INH	fabG1_ups:C-15T- 1673425	4	Euro-American	ungrouped	R	S	S	S
SRR19048590	SRR19048590	2018	Lazio	0	0	0	1260582	1252159	99.33	54	50243	Pan-S		4.1.2.1	Haarlem	ungrouped	S	S	S	S
SRR19048591	SRR19048591	2018	Lazio	0	0	0	1501977	1493868	99.46	68	46596	Pan-S		4.8	mainly T	ungrouped	S	S	S	S
SRR19048592	SRR19048592	2019	Lazio	1	0	0	1792806	1782710	99.44	97	64975	Pan-S		4.8	mainly T	group_195	S	S	S	S
SRR19048593	SRR19048593	2019	Lazio	0	0	0	1408651	1401806	99.51	63	60371	Pan-S		4.8	mainly T	group_186	S	S	S	S
SRR19048594	SRR19048594	2019	Lazio	0	0	0	1450665	1396568	96.27	63	77735	Pan-S		4.3.3	LAM	group_153	S	S	S	S
SRR19048595	SRR19048595	2019	Lazio	Not available	0	Not available	1525702	1514017	99.23	70	73803	Pan-S		4.3.3	LAM	group_153	S	S	S	S
SRR19048596	SRR19048596	2019	Lazio	Not available	0	0	1847727	1817027	98.34	84	74425	Pan-S		4.4.1.2	Euro-American	group_215	S	S	S	S
SRR19048597	SRR19048597	2019	Lazio	Not available	0	0	1098696	1047153	95.31	52	71323	MDR	embB:Gly406Ala, katG: Ser315Thr, rpoB:Ser450Leu	3	Delhi-CAS	ungrouped	R	R	R	S
SRR19048598	SRR19048598	2019	Lazio	Not available	0	0	1277975	1260700	98.65	62	72879	Mono-INH	katG:Ser315Thr	4.1.2.1	Haarlem	ungrouped	R	S	S	S
SRR19048599	SRR19048599	2019	Lazio	Not available	0	0	934446	928334	99.35	44	72692	Pan-S		4.1.2.1	Haarlem	ungrouped	S	S	S	S
SRR19048600	SRR19048600	2019	Lazio	Not available	0	Not available	1823561	1806611	99.07	76	35925	Pan-S		1.2.1	EAI Manila	ungrouped	S	S	S	S
SRR19048601	SRR19048601	2019	Lazio	Not available	0	Not available	1697380	1685117	99.28	77	54170	Pan-S		2.2.1	Beijing	group_101	S	S	S	S
SRR19048602	SRR19048602	2019	Lazio	Not available	0	0	1491370	1476582	99.01	66	41678	Pan-S		1.1.2	EAI	ungrouped	S	S	S	S
SRR19048603	SRR19048603	2019	Lazio	1	0	0	590849	588397	99.59	28	54449	Pan-S		4.8	mainly T	group_56	S	S	S	S
SRR19048604	SRR19048604	2019	Lazio	Not available	0	0	1576153	1538011	97.58	74	51615	Pan-S		4.1.2.1	Haarlem	ungrouped	S	S	S	S
SRR19048605	SRR19048605	2019	Lazio	Not available	0	0	939048	930386	99.08	47	80657	Pan-S		2.2.1	Beijing	group_187	S	S	S	S
SRR19048606	SRR19048606	2019	Lazio	1	0	Not available	2058907	1995161	96.9	101	51087	Pan-S		4.1.2.1	Haarlem	group_16	S	S	S	S
SRR19048607	SRR19048607	2019	Lazio	Not available	0	1	2674803	2655745	99.29	119	26969	Pan-S		4.8	mainly T	group_171	S	S	S	S
SRR19048609	SRR19048609	2019	Lazio	Not available	0	0	880586	805610	91.49	38	65345	Pan-S		4.8	mainly T	group_211	S	S	S	S
SRR19048610	SRR19048610	2019	Lazio	0	0	0	960620	923741	96.16	41	42701	Pan-S		4.3.3	LAM	ungrouped	S	S	S	S
SRR19048611	SRR19048611	2019	Lazio	Not available	0	0	1125351	1044467	92.81	40	33793	Pan-S		4.8	mainly T	ungrouped	S	S	S	S
SRR19048612	SRR19048612	2019	Lazio	1	0	0	1558013	1500012	96.28	62	23998	Pan-S		3	Delhi-CAS	ungrouped	S	S	S	S
SRR19048614	SRR19048614	2019	Lazio	0	0	0	1124265	1105191	98.3	53	45913	Pan-S		4.1.2.1	Haarlem	ungrouped	S	S	S	S
SRR19048615	SRR19048615	2019	Lazio	Not available	0	0	1530901	1446874	94.51	63	41865	Pan-S		4.1.2.1	Haarlem	group_145	S	S	S	S
SRR19048616	SRR19048616	2019	Lazio	1	0	0	1085277	1054866	97.2	49	84320	Pan-S		1.1.1	EAI	ungrouped	S	S	S	S
SRR19048619	SRR19048619	2019	Lazio	Not available	0	0	861362	850572	98.75	39	51971	Pan-S		4.8	mainly T	ungrouped	S	S	S	S
SRR19048620	SRR19048620	2019	Lazio	Not available	0	0	1586758	1362367	85.86	59	30229	Pan-S		4.8	mainly T	ungrouped	S	S	S	S
SRR19048621	SRR19048621	2019	Lazio	Not available	0	0	2600818	2499499	96.1	123	58150	Pan-S		4.6.2	Euro-American	ungrouped	S	S	S	S
SRR19048622	SRR19048622	2019	Lazio	Not available	0	Not available	1990941	1969093	98.9	95	62259	Pan-S		4.8	mainly T	ungrouped	S	S	S	S
SRR19048623	SRR19048623	2019	Lazio	Not available	0	0	1392229	1385835	99.54	63	49623	Pan-S		4.4.1.2	Euro-American	group_215	S	S	S	S
SRR19048624	SRR19048624	2018	Lazio	0	0	0	1663681	1655775	99.52	80	49785	Pan-S		4.4.1.1	S-type	ungrouped	S	S	S	S
SRR19048625	SRR19048625	2018	Lazio	Not available	0	0	1438478	1430776	99.46	72	62424	Other	rrs:1472337_C>T_SNP	4.3.2	LAM	ungrouped	S	S	S	S
SRR19048626	SRR19048626	2018	Lazio	Not available	0	0	1561204	1550716	99.33	72	36187	Pan-S		4.8	mainly T	ungrouped	S	S	S	S
SRR19048627	SRR19048627	2018	Lazio	Not available	1	Not available	1198233	1186724	99.04	53	70093	Pan-S		1.2.1	EAI Manila	ungrouped	S	S	S	S
SRR19048628	SRR19048628	2018	Lazio	0	0	0	1142348	1133465	99.22	53	76267	Mono-FQs	gyrA: Asp94Gly	2.2.1	Beijing	group_101	S	S	S	S
SRR19048629	SRR19048629	2019	Lazio	0	0	Not available	1520077	1501480	98.78	70	42157	Pan-S		4.1.2.1	Haarlem	ungrouped	S	S	S	S
SRR19048630	SRR19048630	2018	Lazio	0	0	0	1170681	1163101	99.35	54	70427	Pan-S		4.3.3	LAM	ungrouped	S	S	S	S
SRR19048631	SRR19048631	2018	Lazio	0	0	0	1028169	1020319	99.24	48	77724	Mono-FQs	gyrA: Asp94Gly	2.2.1	Beijing	group_101	S	S	S	S
SRR19048633	SRR19048633	2018	Lazio	0	0	1	1327654	1321980	99.57	61	103267	Pan-S		4.3.4.2	LAM	ungrouped	S	S	S	S
SRR19048634	SRR19048634	2018	Lazio	0	0	Not available	1406974	1398901	99.43	67	57814	Pan-S		4.9	H37Rv-like	group_61	S	S	S	S
SRR19048635	SRR19048635	2018	Lazio	0	0	1	1093691	1088045	99.48	52	58487	Pan-S		4.9	H37Rv-like	group_61	S	S	S	S
SRR19048636	SRR19048636	2018	Lazio	Not available	1	0	1876719	1865588	99.41	88	56524	Pan-S		4.4.1.1	S-type	ungrouped	S	S	S	S
SRR19048637	SRR19048637	2018	Lazio	1	0	Not available	1381611	1339393	96.94	79	90622	Pan-S		4.1.2.1	Haarlem	ungrouped	S	S	S	S
SRR19048638	SRR19048638	2018	Lazio	1	0	0	1431723	1424033	99.46	82	60626	Pan-S		4.8	mainly T	ungrouped	S	S	S	S
SRR19048639	SRR19048639	2018	Lazio	Not available	0	0	1562302	1553634	99.45	87	71471	Pan-S		2.2.1	Beijing	group_101	S	S	S	S
SRR19048640	SRR19048640	2019	Lazio	1	0	0	1451173	1160209	79.95	56	63765	Pan-S		2.2.2	Beijing	ungrouped	S	S	S	S
SRR19048641	SRR19048641	2018	Lazio	1	0	0	1827558	1816567	99.4	105	60965	Poly-resistant	katG: Ser315Thr, rpsL:Lys43Arg	3	Delhi-CAS	group_244	R	S	S	S
SRR19048642	SRR19048642	2018	Lazio	1	0	Not available	1099509	1094687	99.56	56	56560	Pan-S		4.8	mainly T	group_165	S	S	S	S
SRR19048643	SRR19048643	2018	Lazio	1	0	0	1033202	1027344	99.43	50	53227	Pan-S		4.8	mainly T	group_183	S	S	S	S
SRR19048644	SRR19048644	2018	Lazio	1	0	0	1106208	1099228	99.37	55	64449	Pan-S		4.8	mainly T	ungrouped	S	S	S	S
SRR19048645	SRR19048645	2018	Lazio	1	1	0	1314003	1308936	99.61	65	56620	Mono-INH	fabG1_ups:C-15T- 1673425	4.8	mainly T	ungrouped	R	S	S	S
SRR19048646	SRR19048646	2018	Lazio	0	0	1	1171724	1164803	99.41	54	48192	Pan-S		4.8	mainly T	group_59	S	S	S	S
SRR19048647	SRR19048647	2018	Lazio	Not available	0	0	1727016	1718186	99.49	64	36846	Pan-S		4.8	mainly T	group_171	S	S	S	S
SRR19048648	SRR19048648	2017	Lazio	1	0	Not available	1159160	1150378	99.24	53	80938	Pan-S		3	Delhi-CAS	ungrouped	S	S	S	S
SRR19048649	SRR19048649	2017	Lazio	1	0	0	2613772	2601193	99.52	110	32966	Pan-S		4.8	mainly T	group_225	S	S	S	S
SRR19048650	SRR19048650	2017	Lazio	Not available	0	0	1311535	1302634	99.32	69	50973	Pan-S		4.1.2.1	Haarlem	ungrouped	S	S	S	S
SRR19048651	SRR19048651	2019	Lazio	0	0	0	1846598	1828125	99	92	47942	Pan-S		3	Delhi-CAS	ungrouped	S	S	S	S
SRR19048652	SRR19048652	2017	Lazio	1	0	0	1292931	1285093	99.39	60	61378	MDR	fabG1_ups:C-15T- 1673425, pncA:His51Arg, rpoB: Ser450Leu	4.3.3	LAM	ungrouped	R	R	S	S
SRR19048653	SRR19048653	2018	Lazio	1	0	0	1148446	1142089	99.45	59	90781	Poly-resistant	katG: Ser315Thr, rpsL:Lys43Arg, thyA:Arg222Gly	2.2.1	Beijing	ungrouped	R	S	S	S
SRR19048654	SRR19048654	2018	Lazio	0	0	0	1169450	1162717	99.42	59	86388	Pan-S		2.2.1	Beijing	group_101	S	S	S	S
SRR19048655	SRR19048655	2017	Lazio	0	0	0	1206307	1185229	98.25	57	84905	Pan-S		2.2.1	Beijing	group_101	S	S	S	S
SRR19048656	SRR19048656	2020	Lazio	Not available	0	0	898132	892444	99.37	45	54932	Pan-S		4.8	mainly T	group_178	S	S	S	S
SRR19048657	SRR19048657	2020	Lazio	Not available	0	0	743414	713239	95.94	35	60647	Pan-S		4.1.2.1	Haarlem	group_70	S	S	S	S
SRR19048658	SRR19048658	2020	Lazio	0	0	0	2386600	2369566	99.29	129	58125	Pan-S		4.1.2.1	Haarlem	ungrouped	S	S	S	S
SRR19048659	SRR19048659	2020	Lazio	0	0	0	1242367	791817	63.73	37	48230	Pan-S		4.8	mainly T	group_36	S	S	S	S
SRR19048660	SRR19048660	2020	Lazio	Not available	0	1	650823	645901	99.24	35	79993	Pan-S		4.1.2.1	Haarlem	ungrouped	S	S	S	S
SRR19048661	SRR19048661	2020	Lazio	Not available	0	0	1123169	1117847	99.53	51	53803	Pan-S		4.7	mainly T	group_236	S	S	S	S
SRR19048662	SRR19048662	2020	Lazio	1	0	Not available	1464737	1457843	99.53	83	59082	Other	embB:Met306Val	4.8	mainly T	ungrouped	S	S	S	S
SRR19048663	SRR19048663	2020	Lazio	Not available	0	Not available	788627	779909	98.89	37	52076	Pan-S		4.1.2	Euro-American	group_46	S	S	S	S
SRR19048664	SRR19048664	2020	Lazio	Not available	0	0	1065151	1057726	99.3	51	60496	Pan-S		4.1.2.1	Haarlem	group_44	S	S	S	S
SRR19048665	SRR19048665	2019	Lazio	0	0	1	1879120	1833009	97.55	83	80620	Pan-S		6	West-Africa 2	ungrouped	S	S	S	S
SRR19048666	SRR19048666	2020	Lazio	Not available	0	0	1421238	1414505	99.53	66	50200	Pan-S		4.1.2.1	Haarlem	ungrouped	S	S	S	S
SRR19048667	SRR19048667	2020	Lazio	Not available	0	Not available	2566997	2537258	98.84	127	39752	Pan-S		4.4.1.1	S-type	ungrouped	S	S	S	S
SRR19048668	SRR19048668	2020	Lazio	Not available	0	0	1359752	1342040	98.7	63	54945	Pan-S		4.1.2.1	Haarlem	ungrouped	S	S	S	S
SRR19048670	SRR19048670	2020	Lazio	Not available	0	0	961200	955643	99.42	47	60278	Pan-S		4.1.2.1	Haarlem	ungrouped	S	S	S	S
SRR19048671	SRR19048671	2020	Lazio	Not available	0	0	1295087	1287284	99.4	63	55494	Pan-S		4.7	mainly T	group_136	S	S	S	S
SRR19048672	SRR19048672	2020	Lazio	0	0	0	1680788	1673323	99.56	81	50543	Pan-S		4.7	mainly T	group_136	S	S	S	S
SRR19048673	SRR19048673	2020	Lazio	Not available	0	0	1147234	1110448	96.79	56	44445	Pan-S		4.1.2.1	Haarlem	ungrouped	S	S	S	S
SRR19048674	SRR19048674	2020	Lazio	0	0	0	1288626	1268437	98.43	65	51530	Pan-S		4.1.2	Euro-American	ungrouped	S	S	S	S
SRR19048676	SRR19048676	2019	Lazio	1	0	0	938773	930383	99.11	49	71934	Pan-S		4.1.2.1	Haarlem	ungrouped	S	S	S	S
SRR19048677	SRR19048677	2020	Lazio	Not available	0	0	914304	898836	98.31	43	55718	Pan-S		4.8	mainly T	ungrouped	S	S	S	S
SRR19048678	SRR19048678	2019	Lazio	0	0	Not available	764218	760681	99.54	39	61080	Pan-S		4.4.1.1	S-type	ungrouped	S	S	S	S
SRR19048679	SRR19048679	2020	Lazio	Not available	0	0	829050	821218	99.06	43	68770	Pan-S		4.8	mainly T	ungrouped	S	S	S	S
SRR19048680	SRR19048680	2020	Lazio	0	0	0	1120480	1032350	92.13	50	51886	MDR	embB:Met306Val, katG:Ser315Thr, rpoB:Gln432Pro, rpsL:Lys43Arg	4.8	mainly T	group_94	R	R	R	S
SRR19048681	SRR19048681	2020	Lazio	1	0	0	1238406	1114445	89.99	53	33310	MDR	embB:Gly406Ala , katG:Ser315Thr, pncA:Gln10Pro, rpoB:Ser450Leu, rpsL:Lys88Arg	4.2.1	Ural	ungrouped	R	R	R	S
SRR19048682	SRR19048682	2020	Lazio	Not available	0	0	1116905	1076584	96.39	47	41324	Pan-S		4.8	mainly T	ungrouped	S	S	S	S
SRR19048683	SRR19048683	2020	Lazio	Not available	0	0	909231	895083	98.44	31	52272	Pan-S		4.1.2.1	Haarlem	ungrouped	S	S	S	S
SRR19048684	SRR19048684	2020	Lazio	Not available	0	0	683621	653959	95.66	27	32970	Pan-S		1.2.1	EAI Manila	ungrouped	S	S	S	S
SRR19048685	SRR19048685	2020	Lazio	Not available	1	1	817340	811774	99.32	39	79185	Pan-S		2.2.1	Beijing	ungrouped	S	S
SRR19048686	SRR19048686	2020	Lazio	Not available	0	0	912846	907626	99.43	46	65733	Pan-S		4.1.2.1	Haarlem	ungrouped	S	S	S	S
SRR19048687	SRR19048687	2019	Lazio	1	0	0	1485028	1475471	99.36	75	55147	Pan-S		4.8	mainly T	ungrouped	S	S	S	S
SRR19048688	SRR19048688	2019	Lazio	Not available	0	0	1241455	1091551	87.93	50	119467	Pan-S		5	West-Africa 1	ungrouped	S	S
SRR19048689	SRR19048689	2019	Lazio	0	0	0	1283486	1190858	92.78	58	47047	Pan-S		4.8	mainly T	group_245	S	S	S	S
[truncated: 522 more rows]
