# Supplementary material for: Comprehensive Whole Genome Sequencing Dataset of Mycobacterium tuberculosis Strains Collected Across Italy
Source: Springer Nature journal article supplement (doi:10.1038/s41597-025-04966-1), 2025-04-15
Supplement: MOESM2 [file 41597_2025_4966_MOESM2_ESM.xlsx]

## Sheet: Mapping_and_Variant_Statistics
Date	SampleID	LibraryID	Total Reads	Mapped Reads	% Mapped Reads	Genome Size	Genome GC	(Any) Total Bases	% (Any) Total Bases	(Any) GC-Content	(Any) Coverage mean	(Any) Coverage median	(Unambiguous) Total Bases	% (Unambiguous) Total Bases	(Unambiguous) GC-Content	(Unambiguous) Coverage mean	(Unambiguous) Coverage median	SNPs	Deletions	Insertions	Uncovered	Substitutions (Including Stop Codons)
2022-04-20	IT2770	200422	5408420	3050531	56.4	4411532	65.61	4366916	0.99	65.59	90.43	89	4305365	0.98	65.47	91.55	89	1428	245	150	44616	773
2022-04-20	IT2771	200422	4068749	2488317	61.16	4411532	65.61	4350824	0.99	65.62	71.79	73	4303553	0.98	65.52	72.46	73	866	165	106	60708	466
2022-04-20	IT2780	200422	4243289	1784828	42.06	4411532	65.61	4385198	0.99	65.61	50.7	51	4311238	0.98	65.48	51.38	51	917	137	115	26334	465
2022-04-20	IT2785	200422	3617964	3217995	88.94	4411532	65.61	4410044	1	65.61	86.09	86	4386304	0.99	65.57	86.49	87	99	18	15	1488	34
2022-04-20	IT2790	200422	4681634	4411716	94.23	4411532	65.61	4334826	0.98	65.61	122.04	122	4283088	0.97	65.5	123.38	122	2402	388	203	76706	1295
2022-04-20	IT2792	200422	5589265	2819416	50.44	4411532	65.61	4390808	1	65.6	77.55	79	4347705	0.99	65.51	78.18	79	909	245	124	20724	458
2022-04-20	IT2799	200422	5202346	1401160	26.93	4411532	65.61	4367629	0.99	65.58	38.66	39	4239717	0.96	65.42	39.5	39	812	109	97	43903	389
2022-04-20	IT2811	200422	3446671	2114228	61.34	4411532	65.61	4393186	1	65.6	58.85	60	4330236	0.98	65.48	59.52	60	590	99	56	18346	312
2022-04-20	IT2813	200422	5494372	3163915	57.58	4411532	65.61	4400777	1	65.6	84.99	86	4355301	0.99	65.5	85.74	87	516	95	65	10755	286
2022-04-20	IT2814	200422	4763358	1207294	25.35	4411532	65.61	4397431	1	65.58	32.65	32	4258853	0.97	65.47	33.35	33	656	59	65	14101	287
2022-04-20	IT2816	200422	3122118	3040522	97.39	4411532	65.61	4386618	0.99	65.58	91.21	92	4325624	0.98	65.45	92.29	93	2104	230	214	24914	1131
2022-04-20	IT2817	200422	3829675	3731699	97.44	4411532	65.61	4389907	1	65.6	105.17	106	4353111	0.99	65.51	105.94	106	523	86	61	21625	290
2022-04-20	IT2822	200422	5310892	4826045	90.87	4411532	65.61	4362976	0.99	65.61	137.88	140	4341404	0.98	65.55	138.51	140	803	301	98	48556	407
2022-04-20	IT2829	200422	4359382	2613958	59.96	4411532	65.61	4389673	1	65.58	73.71	75	4335191	0.98	65.45	74.52	75	795	172	124	21859	412
2022-04-20	IT2830	200422	3237548	3076574	95.03	4411532	65.61	4377700	0.99	65.57	87.97	89	4319864	0.98	65.42	89.04	90	850	124	100	33832	453
2022-04-20	IT2834	200422	3421227	3224698	94.26	4411532	65.61	4377824	0.99	65.56	95.61	95	4303496	0.98	65.41	97.13	96	2121	359	214	33708	1140
2022-04-20	IT2838	200422	4546181	4121683	90.66	4411532	65.61	4399254	1	65.6	116.38	116	4364137	0.99	65.5	117.25	117	501	104	58	12278	269
2022-04-20	IT2853	200422	1752882	1703973	97.21	4411532	65.61	4364960	0.99	65.51	52.08	53	4234922	0.96	65.33	53.29	53	556	70	63	46572	287
2022-04-20	IT2854	200422	5597149	4751284	84.89	4411532	65.61	4395073	1	65.61	126.09	126	4363343	0.99	65.53	126.88	126	1431	278	137	16459	762
2022-04-20	IT2862	200422	3518523	1873801	53.26	4411532	65.61	4397501	1	65.61	50.67	46	4277302	0.97	65.49	51.77	47	1369	153	149	14031	728
2022-04-20	IT2866	200422	5971328	1979430	33.15	4411532	65.61	4338126	0.98	65.53	55.58	56	4214216	0.96	65.29	56.91	56	841	108	77	73406	435
2022-04-20	IT2867	200422	2940194	1675096	56.97	4411532	65.61	4375775	0.99	65.53	48.57	49	4245903	0.96	65.33	49.71	49	940	189	85	35757	482
2022-04-20	IT2870	200422	3634657	1397749	38.46	4411532	65.61	4368223	0.99	65.59	39.69	39	4239556	0.96	65.46	40.54	39	1312	172	186	43309	697
2022-05-05	SRR19048528	IonTorrent	1268882	1262993	99.54	4411532	65.61	4348064	0.99	65.47	58.19	59	4295837	0.97	65.32	58.8	59	521	95	64	63468	285
2022-05-05	SRR19048529	IonTorrent	1008222	1000941	99.28	4411532	65.61	4343689	0.98	65.48	45.24	46	4276214	0.97	65.31	45.82	46	1413	224	129	67843	747
2022-05-05	SRR19048530	IonTorrent	1603808	1219799	76.06	4411532	65.61	4338552	0.98	65.49	58.92	59	4289331	0.97	65.36	59.52	60	803	256	82	72980	403
2022-05-05	SRR19048531	IonTorrent	471981	469954	99.57	4411532	65.61	4359251	0.99	65.44	21.08	21	3964018	0.9	65.19	22.08	21	270	52	53	52281	137
2022-05-05	SRR19048532	IonTorrent	1641511	1632960	99.48	4411532	65.61	4375196	0.99	65.56	73.1	75	4325176	0.98	65.42	73.87	75	938	324	101	36336	483
2022-05-05	SRR19048533	IonTorrent	1733282	1723701	99.45	4411532	65.61	4350009	0.99	65.54	77.04	77	4301320	0.98	65.41	77.82	77	1467	214	149	61523	779
2022-05-05	SRR19048534	IonTorrent	864303	857285	99.19	4411532	65.61	4346736	0.99	65.45	40.02	39	4175710	0.95	65.32	41.02	40	607	86	52	64796	320
2022-05-05	SRR19048535	IonTorrent	718981	708147	98.49	4411532	65.61	4365463	0.99	65.51	31.57	31	4219128	0.96	65.31	32.33	32	870	249	100	46069	440
2022-05-05	SRR19048536	IonTorrent	1148540	1085228	94.49	4411532	65.61	4360344	0.99	65.53	46.83	47	4293106	0.97	65.36	47.46	47	927	141	90	51188	481
2022-05-05	SRR19048537	IonTorrent	1481219	679606	45.88	4411532	65.61	4349917	0.99	65.49	28.83	29	4244627	0.96	65.32	29.34	29	953	85	96	61615	471
2022-05-05	SRR19048538	IonTorrent	1987122	1977879	99.53	4411532	65.61	4366464	0.99	65.5	102.45	104	4318927	0.98	65.35	103.48	105	518	143	55	45068	275
2022-05-05	SRR19048539	IonTorrent	4376991	4360926	99.63	4411532	65.61	4374279	0.99	65.54	199.77	201	4338082	0.98	65.42	201.31	202	537	161	49	37253	293
2022-05-05	SRR19048540	IonTorrent	1703321	1686796	99.03	4411532	65.61	4371965	0.99	65.54	76.24	77	4319123	0.98	65.4	77.08	77	933	327	105	39567	476
2022-05-05	SRR19048541	IonTorrent	1200995	1196168	99.6	4411532	65.61	4375269	0.99	65.51	53.75	53	4314253	0.98	65.36	54.4	54	553	222	50	36263	294
2022-05-05	SRR19048542	IonTorrent	611091	608310	99.54	4411532	65.61	4372248	0.99	65.49	26.84	27	4226355	0.96	65.27	27.45	27	531	90	58	39284	276
2022-05-05	SRR19048543	IonTorrent	1157656	1149802	99.32	4411532	65.61	4371555	0.99	65.53	51.16	52	4306488	0.98	65.34	51.82	52	941	276	94	39977	482
2022-05-05	SRR19048544	IonTorrent	894545	888225	99.29	4411532	65.61	4360386	0.99	65.5	39.86	40	4271825	0.97	65.32	40.52	40	524	97	62	51146	285
2022-05-05	SRR19048545	IonTorrent	2166451	2147824	99.14	4411532	65.61	4361392	0.99	65.51	97.9	100	4318523	0.98	65.39	98.78	100	522	120	54	50140	287
2022-05-05	SRR19048546	IonTorrent	1347027	1342686	99.68	4411532	65.61	4354268	0.99	65.49	63.4	64	4299647	0.97	65.34	64.1	64	813	163	96	57264	423
2022-05-05	SRR19048547	IonTorrent	780012	774993	99.36	4411532	65.61	4334262	0.98	65.45	37.06	37	4254954	0.96	65.27	37.59	37	1351	209	138	77270	718
2022-05-05	SRR19048548	IonTorrent	1042889	1031954	98.95	4411532	65.61	4350080	0.99	65.47	47.14	47	4285758	0.97	65.3	47.73	48	528	127	66	61452	290
2022-05-05	SRR19048549	IonTorrent	1332627	1319477	99.01	4411532	65.61	4356278	0.99	65.46	63.04	64	4308897	0.98	65.33	63.64	64	875	121	91	55254	460
2022-05-05	SRR19048550	IonTorrent	2175487	2126713	97.76	4411532	65.61	4358202	0.99	65.47	101.99	104	4318878	0.98	65.35	102.86	104	562	110	61	53330	303
2022-05-05	SRR19048551	IonTorrent	1249745	1239268	99.16	4411532	65.61	4353065	0.99	65.45	60.36	61	4294737	0.97	65.3	61.06	61	2178	319	238	58467	1183
2022-05-05	SRR19048552	IonTorrent	1243095	1234285	99.29	4411532	65.61	4352311	0.99	65.47	60.99	62	4282693	0.97	65.3	61.84	62	924	280	85	59221	477
2022-05-05	SRR19048553	IonTorrent	1677139	1670991	99.63	4411532	65.61	4331170	0.98	65.51	75.06	76	4273153	0.97	65.34	75.96	77	821	238	74	80362	417
2022-05-05	SRR19048554	IonTorrent	1022468	1013080	99.08	4411532	65.61	4372341	0.99	65.54	44.1	44	4293116	0.97	65.36	44.77	45	903	103	89	39191	461
2022-05-05	SRR19048555	IonTorrent	1263805	1254089	99.23	4411532	65.61	4347909	0.99	65.48	59.21	60	4293452	0.97	65.35	59.88	60	877	240	95	63623	471
2022-05-05	SRR19048556	IonTorrent	1720945	1647621	95.74	4411532	65.61	4362684	0.99	65.48	76.54	77	4312628	0.98	65.34	77.32	77	957	138	120	48848	495
2022-05-05	SRR19048557	IonTorrent	1182377	1161562	98.24	4411532	65.61	4345083	0.98	65.48	54.33	54	4263564	0.97	65.31	55.13	54	917	110	81	66449	479
2022-05-05	SRR19048558	IonTorrent	1017870	1004077	98.64	4411532	65.61	4354738	0.99	65.47	45.93	46	4277609	0.97	65.32	46.64	46	2114	461	238	56794	1139
2022-05-05	SRR19048559	IonTorrent	1962094	1951148	99.44	4411532	65.61	4395321	1	65.57	81.29	82	4358977	0.99	65.45	81.89	82	551	205	58	16211	308
2022-05-05	SRR19048560	IonTorrent	887827	836087	94.17	4411532	65.61	4376406	0.99	65.54	34.82	35	4306774	0.98	65.37	35.27	35	808	120	115	35126	413
2022-05-05	SRR19048561	IonTorrent	587088	566364	96.47	4411532	65.61	4354550	0.99	65.49	24.46	24	4198929	0.95	65.25	25.05	25	886	110	124	56982	470
2022-05-05	SRR19048562	IonTorrent	1594716	1574997	98.76	4411532	65.61	4363082	0.99	65.51	75.57	77	4302739	0.98	65.39	76.53	77	951	260	104	48450	489
2022-05-05	SRR19048563	IonTorrent	1672656	1660682	99.28	4411532	65.61	4371951	0.99	65.5	77.02	78	4329134	0.98	65.38	77.71	78	531	153	68	39581	287
2022-05-05	SRR19048564	IonTorrent	620509	591884	95.39	4411532	65.61	4351116	0.99	65.47	25.65	26	4241333	0.96	65.28	26.1	26	822	168	90	60416	440
2022-05-05	SRR19048565	IonTorrent	2042647	1960371	95.97	4411532	65.61	4346784	0.99	65.53	89.34	90	4297749	0.97	65.38	90.27	90	2275	539	217	64748	1226
2022-05-05	SRR19048566	IonTorrent	2047379	1866642	91.17	4411532	65.61	4356968	0.99	65.53	84.69	85	4305052	0.98	65.38	85.62	86	1455	255	173	54564	772
2022-05-05	SRR19048567	IonTorrent	1846273	1765738	95.64	4411532	65.61	4346975	0.99	65.51	80.24	81	4309289	0.98	65.4	80.86	81	805	239	84	64557	403
2022-05-05	SRR19048568	IonTorrent	722536	632397	87.52	4411532	65.61	4371503	0.99	65.53	28.05	28	4273623	0.97	65.33	28.52	28	903	148	95	40029	470
2022-05-05	SRR19048569	IonTorrent	1070074	1021437	95.45	4411532	65.61	4369336	0.99	65.49	45.59	46	4302589	0.98	65.31	46.2	46	2073	367	248	42196	1112
2022-05-05	SRR19048570	IonTorrent	1663883	1649306	99.12	4411532	65.61	4386948	0.99	65.57	71.7	73	4319389	0.98	65.39	72.72	73	905	240	102	24584	468
2022-05-05	SRR19048571	IonTorrent	1360239	1348993	99.17	4411532	65.61	4377838	0.99	65.55	60.05	61	4313096	0.98	65.37	60.85	61	942	280	121	33694	469
2022-05-05	SRR19048572	IonTorrent	1110994	789968	71.1	4411532	65.61	4370721	0.99	65.53	34.4	35	4278561	0.97	65.33	35	35	922	159	78	40811	480
2022-05-05	SRR19048573	IonTorrent	718664	715959	99.62	4411532	65.61	4359192	0.99	65.49	30.33	30	4273266	0.97	65.29	30.8	31	841	129	75	52340	434
2022-05-05	SRR19048574	IonTorrent	1161153	1142830	98.42	4411532	65.61	4350419	0.99	65.5	53.11	54	4295523	0.97	65.36	53.69	54	923	143	105	61113	476
2022-05-05	SRR19048575	IonTorrent	1029902	988686	96	4411532	65.61	4360228	0.99	65.48	48.63	49	4294640	0.97	65.31	49.26	49	944	208	105	51304	475
2022-05-05	SRR19048576	IonTorrent	697100	569932	81.76	4411532	65.61	4351485	0.99	65.46	27.02	27	4194323	0.95	65.43	27.7	27	490	152	47	60047	264
2022-05-05	SRR19048577	IonTorrent	1384989	1377600	99.47	4411532	65.61	4369566	0.99	65.5	59.52	61	4323926	0.98	65.39	60.07	61	934	239	100	41966	476
2022-05-05	SRR19048578	IonTorrent	1874805	1853539	98.87	4411532	65.61	4338995	0.98	65.47	98.04	98	4301030	0.97	65.35	98.82	98	1454	414	191	72537	770
2022-05-05	SRR19048579	IonTorrent	1970379	1961804	99.56	4411532	65.61	4333215	0.98	65.43	109.22	111	4295271	0.97	65.32	110.09	111	810	169	148	78317	423
2022-05-05	SRR19048580	IonTorrent	1170628	1161603	99.23	4411532	65.61	4358751	0.99	65.47	59.27	60	4301923	0.98	65.31	59.96	60	1362	368	131	52781	729
2022-05-05	SRR19048581	IonTorrent	298559	296125	99.18	4411532	65.61	4347227	0.99	65.45	12.28	12	2924885	0.66	66.37	14.5	14	579	52	34	64305	296
2022-05-05	SRR19048582	IonTorrent	301760	300333	99.53	4411532	65.61	4333630	0.98	65.4	14.05	14	3495591	0.79	64.94	15.32	15	616	87	57	77902	322
2022-05-05	SRR19048583	IonTorrent	1096735	1087089	99.12	4411532	65.61	4320371	0.98	65.41	55.16	55	4253493	0.96	65.23	55.91	55	1362	353	201	91161	708
2022-05-05	SRR19048584	IonTorrent	1583576	1576026	99.52	4411532	65.61	4358575	0.99	65.46	83.27	84	4315689	0.98	65.34	84.02	85	847	162	176	52957	445
2022-05-05	SRR19048585	IonTorrent	1332583	1318271	98.93	4411532	65.61	4341915	0.98	65.43	68.7	69	4289536	0.97	65.32	69.44	69	930	295	147	69617	480
2022-05-05	SRR19048586	IonTorrent	2332957	2316130	99.28	4411532	65.61	4379483	0.99	65.51	107.35	108	4336305	0.98	65.39	108.32	108	936	185	130	32049	489
2022-05-05	SRR19048587	IonTorrent	1428039	1417265	99.25	4411532	65.61	4345082	0.98	65.43	76.32	77	4303813	0.98	65.32	76.98	78	573	120	115	66450	280
2022-05-05	SRR19048588	IonTorrent	1431868	1422561	99.35	4411532	65.61	4354314	0.99	65.45	76.74	77	4306819	0.98	65.32	77.51	77	1393	379	194	57218	741
2022-05-05	SRR19048589	IonTorrent	1321382	1313270	99.39	4411532	65.61	4360103	0.99	65.45	62.26	63	4314373	0.98	65.31	62.84	63	837	158	124	51429	424
2022-05-05	SRR19048590	IonTorrent	1260582	1252159	99.33	4411532	65.61	4361289	0.99	65.5	53.2	54	4309862	0.98	65.35	53.76	54	921	119	137	50243	471
2022-05-05	SRR19048591	IonTorrent	1501977	1493868	99.46	4411532	65.61	4364936	0.99	65.48	67.98	68	4319079	0.98	65.34	68.64	68	539	167	80	46596	296
2022-05-05	SRR19048592	IonTorrent	1792806	1782710	99.44	4411532	65.61	4346557	0.99	65.43	94.86	97	4305198	0.98	65.34	95.68	97	580	166	50	64975	330
2022-05-05	SRR19048593	IonTorrent	1408651	1401806	99.51	4411532	65.61	4351161	0.99	65.47	62.38	63	4304880	0.98	65.34	62.97	63	556	149	52	60371	293
2022-05-05	SRR19048594	IonTorrent	1450665	1396568	96.27	4411532	65.61	4333797	0.98	65.43	62.81	63	4272452	0.97	65.26	63.58	63	834	156	70	77735	439
2022-05-05	SRR19048595	IonTorrent	1525702	1514017	99.23	4411532	65.61	4337729	0.98	65.44	69.51	70	4287337	0.97	65.3	70.23	71	842	153	83	73803	444
2022-05-05	SRR19048596	IonTorrent	1847727	1817027	98.34	4411532	65.61	4337107	0.98	65.44	83.56	84	4286182	0.97	65.29	84.43	84	807	164	61	74425	424
2022-05-05	SRR19048597	IonTorrent	1098696	1047153	95.31	4411532	65.61	4340209	0.98	65.41	51.87	52	4273184	0.97	65.24	52.55	52	1416	298	142	71323	762
2022-05-05	SRR19048598	IonTorrent	1277975	1260700	98.65	4411532	65.61	4338653	0.98	65.43	61.16	62	4288404	0.97	65.3	61.78	62	927	344	100	72879	475
2022-05-05	SRR19048599	IonTorrent	934446	928334	99.35	4411532	65.61	4338840	0.98	65.47	44.04	44	4273180	0.97	65.29	44.61	45	916	121	84	72692	469
2022-05-05	SRR19048600	IonTorrent	1823561	1806611	99.07	4411532	65.61	4375607	0.99	65.51	75.64	76	4330475	0.98	65.37	76.35	77	2092	319	170	35925	1128
2022-05-05	SRR19048601	IonTorrent	1697380	1685117	99.28	4411532	65.61	4357362	0.99	65.53	75.73	77	4310031	0.98	65.38	76.48	77	1446	291	151	54170	769
2022-05-05	SRR19048602	IonTorrent	1491370	1476582	99.01	4411532	65.61	4369854	0.99	65.5	65.79	66	4299557	0.97	65.36	66.76	67	2089	384	227	41678	1132
2022-05-05	SRR19048603	IonTorrent	590849	588397	99.59	4411532	65.61	4357083	0.99	65.47	28.56	28	4233339	0.96	65.33	29.13	29	515	93	43	54449	272
2022-05-05	SRR19048604	IonTorrent	1576153	1538011	97.58	4411532	65.61	4359917	0.99	65.51	72.76	74	4313540	0.98	65.37	73.46	74	970	360	120	51615	490
2022-05-05	SRR19048605	IonTorrent	939048	930386	99.08	4411532	65.61	4330875	0.98	65.44	46.62	47	4271090	0.97	65.29	47.18	47	1391	352	195	80657	749
2022-05-05	SRR19048606	IonTorrent	2058907	1995161	96.9	4411532	65.61	4360445	0.99	65.51	98.98	101	4316265	0.98	65.37	99.91	101	935	304	112	51087	486
2022-05-05	SRR19048607	IonTorrent	2674803	2655745	99.29	4411532	65.61	4384563	0.99	65.56	116.14	119	4338721	0.98	65.4	117.28	119	568	152	70	26969	316
2022-05-05	SRR19048608	IonTorrent	433215	364374	84.11	4411532	65.61	4296989	0.97	65.37	18.48	18	3036537	0.69	64.96	21.55	20	615	68	54	114543	318
2022-05-05	SRR19048609	IonTorrent	880586	805610	91.49	4411532	65.61	4346187	0.99	65.44	38.12	38	4276848	0.97	65.28	38.61	39	543	76	43	65345	293
2022-05-05	SRR19048610	IonTorrent	960620	923741	96.16	4411532	65.61	4368831	0.99	65.53	41.18	41	4314126	0.98	65.38	41.61	42	882	237	86	42701	465
2022-05-05	SRR19048611	IonTorrent	1125351	1044467	92.81	4411532	65.61	4377739	0.99	65.54	39.83	40	4309170	0.98	65.38	40.34	40	517	104	57	33793	278
2022-05-05	SRR19048612	IonTorrent	1558013	1500012	96.28	4411532	65.61	4387534	0.99	65.55	61.82	62	4343894	0.98	65.43	62.36	62	1431	375	120	23998	763
2022-05-05	SRR19048613	IonTorrent	848415	388692	45.81	4411532	65.61	4346081	0.99	65.47	16.6	16	3140217	0.71	65.26	19.08	18	767	96	52	65451	338
2022-05-05	SRR19048614	IonTorrent	1124265	1105191	98.3	4411532	65.61	4365619	0.99	65.51	53.02	53	4309487	0.98	65.38	53.6	53	938	305	129	45913	487
2022-05-05	SRR19048615	IonTorrent	1530901	1446874	94.51	4411532	65.61	4369667	0.99	65.53	62.11	63	4318324	0.98	65.38	62.77	63	947	143	89	41865	488
2022-05-05	SRR19048616	IonTorrent	1085277	1054866	97.2	4411532	65.61	4327212	0.98	65.41	48.08	49	4233438	0.96	65.24	49	49	2112	336	182	84320	1143
2022-05-05	SRR19048617	IonTorrent	266183	264486	99.36	4411532	65.61	4307046	0.98	65.36	12.13	12	2881704	0.65	65.27	14.18	14	499	49	53	104486	269
2022-05-05	SRR19048618	IonTorrent	532873	522221	98	4411532	65.61	4278577	0.97	65.47	23.65	23	4087639	0.93	65.3	24.3	24	2361	259	178	132955	1302
2022-05-05	SRR19048619	IonTorrent	861362	850572	98.75	4411532	65.61	4359561	0.99	65.47	39.41	39	4279673	0.97	65.32	39.97	39	520	112	58	51971	273
2022-05-05	SRR19048620	IonTorrent	1586758	1362367	85.86	4411532	65.61	4381303	0.99	65.54	58.91	59	4329844	0.98	65.38	59.52	59	534	152	63	30229	308
2022-05-05	SRR19048621	IonTorrent	2600818	2499499	96.1	4411532	65.61	4353382	0.99	65.46	120.15	123	4313193	0.98	65.35	121.19	123	768	155	80	58150	385
2022-05-05	SRR19048622	IonTorrent	1990941	1969093	98.9	4411532	65.61	4349273	0.99	65.43	93.11	95	4310069	0.98	65.33	93.88	95	518	177	52	62259	274
2022-05-05	SRR19048623	IonTorrent	1392229	1385835	99.54	4411532	65.61	4361909	0.99	65.53	62.53	63	4313521	0.98	65.4	63.16	63	813	177	91	49623	424
2022-05-05	SRR19048624	IonTorrent	1663681	1655775	99.52	4411532	65.61	4361747	0.99	65.48	79.12	80	4316440	0.98	65.34	79.88	80	812	215	157	49785	417
2022-05-05	SRR19048625	IonTorrent	1438478	1430776	99.46	4411532	65.61	4349108	0.99	65.43	71.53	72	4306802	0.98	65.31	72.16	72	857	164	126	62424	455
2022-05-05	SRR19048626	IonTorrent	1561204	1550716	99.33	4411532	65.61	4375345	0.99	65.51	71.81	72	4323537	0.98	65.36	72.59	72	516	142	90	36187	268
2022-05-05	SRR19048627	IonTorrent	1198233	1186724	99.04	4411532	65.61	4341439	0.98	65.43	53.42	53	4281177	0.97	65.26	54.08	54	2056	345	258	70093	1098
2022-05-05	SRR19048628	IonTorrent	1142348	1133465	99.22	4411532	65.61	4335265	0.98	65.45	52.25	53	4273520	0.97	65.28	52.91	53	1413	219	231	76267	748
2022-05-05	SRR19048629	IonTorrent	1520077	1501480	98.78	4411532	65.61	4369375	0.99	65.52	69.37	70	4318995	0.98	65.38	70.09	70	935	230	108	42157	476
2022-05-05	SRR19048630	IonTorrent	1170681	1163101	99.35	4411532	65.61	4341105	0.98	65.45	53.23	54	4279259	0.97	65.27	53.91	54	871	136	139	70427	457
2022-05-05	SRR19048631	IonTorrent	1028169	1020319	99.24	4411532	65.61	4333808	0.98	65.45	47.45	48	4266936	0.97	65.26	48.09	48	1402	293	227	77724	744
2022-05-05	SRR19048632	IonTorrent	4146	4082	98.46	4411532	65.61	541318	0.12	65.69	1.23	1	0	0	0	0	0	0	0	0	3870214	0
2022-05-05	SRR19048633	IonTorrent	1327654	1321980	99.57	4411532	65.61	4308265	0.98	65.45	60.31	61	4256552	0.96	65.31	60.97	61	821	208	117	103267	442
2022-05-05	SRR19048634	IonTorrent	1406974	1398901	99.43	4411532	65.61	4353718	0.99	65.43	66.16	67	4300625	0.97	65.27	66.9	67	365	45	54	57814	181
2022-05-05	SRR19048635	IonTorrent	1093691	1088045	99.48	4411532	65.61	4353045	0.99	65.43	51.58	52	4296054	0.97	65.27	52.17	52	363	51	49	58487	179
2022-05-05	SRR19048636	IonTorrent	1876719	1865588	99.41	4411532	65.61	4355008	0.99	65.45	86.93	88	4313653	0.98	65.32	87.69	89	825	136	161	56524	420
2022-05-05	SRR19048637	IonTorrent	1381611	1339393	96.94	4411532	65.61	4320910	0.98	65.39	75.66	79	4221503	0.96	65.14	77.3	80	933	306	187	90622	473
2022-05-05	SRR19048638	IonTorrent	1431723	1424033	99.46	4411532	65.61	4350906	0.99	65.42	79.78	82	4285083	0.97	65.25	80.89	83	559	170	131	60626	316
2022-05-05	SRR19048639	IonTorrent	1562302	1553634	99.45	4411532	65.61	4340061	0.98	65.45	85.02	87	4276898	0.97	65.29	86.18	87	1438	448	221	71471	758
2022-05-05	SRR19048640	IonTorrent	1451173	1160209	79.95	4411532	65.61	4347767	0.99	65.49	56.34	56	4297578	0.97	65.37	56.91	56	1498	288	153	63765	731
2022-05-05	SRR19048641	IonTorrent	1827558	1816567	99.4	4411532	65.61	4350567	0.99	65.43	102.05	105	4298232	0.97	65.29	103.19	105	1389	413	232	60965	743
2022-05-05	SRR19048642	IonTorrent	1099509	1094687	99.56	4411532	65.61	4354972	0.99	65.46	55.31	56	4298962	0.97	65.31	55.95	56	519	56	104	56560	267
2022-05-05	SRR19048643	IonTorrent	1033202	1027344	99.43	4411532	65.61	4358305	0.99	65.45	49.01	50	4305519	0.98	65.3	49.53	50	558	117	95	53227	277
2022-05-05	SRR19048644	IonTorrent	1106208	1099228	99.37	4411532	65.61	4347083	0.99	65.43	53.95	55	4298142	0.97	65.31	54.49	55	536	314	95	64449	288
2022-05-05	SRR19048645	IonTorrent	1314003	1308936	99.61	4411532	65.61	4354912	0.99	65.44	63.98	65	4304707	0.98	65.3	64.66	65	564	232	77	56620	318
2022-05-05	SRR19048646	IonTorrent	1171724	1164803	99.41	4411532	65.61	4363340	0.99	65.47	52.92	54	4307383	0.98	65.3	53.53	54	534	222	105	48192	288
2022-05-05	SRR19048647	IonTorrent	1727016	1718186	99.49	4411532	65.61	4374686	0.99	65.52	63.26	64	4330369	0.98	65.38	63.84	64	537	86	54	36846	300
2022-05-05	SRR19048648	IonTorrent	1159160	1150378	99.24	4411532	65.61	4330594	0.98	65.51	52.23	53	4281896	0.97	65.37	52.76	53	1361	271	178	80938	730
2022-05-05	SRR19048649	IonTorrent	2613772	2601193	99.52	4411532	65.61	4378566	0.99	65.54	108.34	110	4338648	0.98	65.41	109.28	110	549	141	79	32966	292
2022-05-05	SRR19048650	IonTorrent	1311535	1302634	99.32	4411532	65.61	4360559	0.99	65.51	67.34	69	4303585	0.98	65.34	68.15	69	924	281	127	50973	479
2022-05-05	SRR19048651	IonTorrent	1846598	1828125	99	4411532	65.61	4363590	0.99	65.49	91.73	92	4318935	0.98	65.38	92.58	93	1411	392	167	47942	760
2022-05-05	SRR19048652	IonTorrent	1292931	1285093	99.39	4411532	65.61	4350154	0.99	65.45	59.12	60	4288735	0.97	65.28	59.88	60	853	200	106	61378	449
2022-05-05	SRR19048653	IonTorrent	1148446	1142089	99.45	4411532	65.61	4320751	0.98	65.42	58.02	59	4267647	0.97	65.28	58.65	59	1453	215	177	90781	773
2022-05-05	SRR19048654	IonTorrent	1169450	1162717	99.42	4411532	65.61	4325144	0.98	65.42	58.32	59	4272193	0.97	65.28	58.94	59	1403	391	210	86388	748
2022-05-05	SRR19048655	IonTorrent	1206307	1185229	98.25	4411532	65.61	4326627	0.98	65.43	57.36	57	4272153	0.97	65.28	57.99	58	1410	281	167	84905	749
2022-05-05	SRR19048656	IonTorrent	898132	892444	99.37	4411532	65.61	4356600	0.99	65.46	43.93	45	4294194	0.97	65.3	44.45	45	550	176	52	54932	303
2022-05-05	SRR19048657	IonTorrent	743414	713239	95.94	4411532	65.61	4350885	0.99	65.46	35.04	35	4270923	0.97	65.28	35.56	35	921	160	109	60647	470
2022-05-05	SRR19048658	IonTorrent	2386600	2369566	99.29	4411532	65.61	4353407	0.99	65.47	126.25	129	4315198	0.98	65.36	127.27	130	987	349	109	58125	495
2022-05-05	SRR19048659	IonTorrent	1242367	791817	63.73	4411532	65.61	4363302	0.99	65.46	36.68	37	4282912	0.97	65.28	37.21	37	654	98	43	48230	285
2022-05-05	SRR19048660	IonTorrent	650823	645901	99.24	4411532	65.61	4331539	0.98	65.43	35.05	35	4245193	0.96	65.26	35.58	36	901	291	109	79993	462
2022-05-05	SRR19048661	IonTorrent	1123169	1117847	99.53	4411532	65.61	4357729	0.99	65.49	50.38	51	4296478	0.97	65.36	50.99	51	533	133	47	53803	291
2022-05-05	SRR19048662	IonTorrent	1464737	1457843	99.53	4411532	65.61	4352450	0.99	65.45	82.45	83	4309081	0.98	65.34	83.18	84	529	79	61	59082	284
2022-05-05	SRR19048663	IonTorrent	788627	779909	98.89	4411532	65.61	4359456	0.99	65.47	36.94	37	4278087	0.97	65.31	37.48	37	900	132	101	52076	455
2022-05-05	SRR19048664	IonTorrent	1065151	1057726	99.3	4411532	65.61	4351036	0.99	65.49	50.2	51	4286377	0.97	65.34	50.84	51	898	147	95	60496	461
2022-05-05	SRR19048665	IonTorrent	1879120	1833009	97.55	4411532	65.61	4330912	0.98	65.48	81.07	83	4288774	0.97	65.35	81.79	83	2269	421	183	80620	1210
2022-05-05	SRR19048666	IonTorrent	1421238	1414505	99.53	4411532	65.61	4361332	0.99	65.51	64.96	66	4311079	0.98	65.37	65.64	66	938	211	92	50200	484
2022-05-05	SRR19048667	IonTorrent	2566997	2537258	98.84	4411532	65.61	4371780	0.99	65.51	123.98	127	4331433	0.98	65.39	125.06	127	810	312	153	39752	416
2022-05-05	SRR19048668	IonTorrent	1359752	1342040	98.7	4411532	65.61	4356587	0.99	65.49	62.81	63	4310995	0.98	65.36	63.4	64	935	326	105	54945	484
2022-05-05	SRR19048669	IonTorrent	609133	569002	93.41	4411532	65.61	4361764	0.99	65.49	23.82	23	4146886	0.94	65.21	24.55	24	1318	249	112	49768	709
2022-05-05	SRR19048670	IonTorrent	961200	955643	99.42	4411532	65.61	4351254	0.99	65.48	46.46	47	4289732	0.97	65.34	47.02	47	910	270	107	60278	466
2022-05-05	SRR19048671	IonTorrent	1295087	1287284	99.4	4411532	65.61	4356038	0.99	65.47	61.57	63	4307269	0.98	65.34	62.18	63	526	187	67	55494	284
2022-05-05	SRR19048672	IonTorrent	1680788	1673323	99.56	4411532	65.61	4360989	0.99	65.49	79.63	81	4316194	0.98	65.36	80.37	81	536	188	66	50543	291
2022-05-05	SRR19048673	IonTorrent	1147234	1110448	96.79	4411532	65.61	4367087	0.99	65.52	55.5	56	4311502	0.98	65.37	56.12	56	950	281	99	44445	490
2022-05-05	SRR19048674	IonTorrent	1288626	1268437	98.43	4411532	65.61	4360002	0.99	65.47	63.86	65	4311691	0.98	65.34	64.49	65	986	178	110	51530	514
2022-05-05	SRR19048675	IonTorrent	345295	341896	99.02	4411532	65.61	4341731	0.98	65.46	15.11	15	3580034	0.81	65.03	16.37	16	726	78	54	69801	382
2022-05-05	SRR19048676	IonTorrent	938773	930383	99.11	4411532	65.61	4339598	0.98	65.44	48.09	49	4272973	0.97	65.28	48.72	49	910	207	111	71934	473
2022-05-05	SRR19048677	IonTorrent	914304	898836	98.31	4411532	65.61	4355814	0.99	65.46	42.18	43	4283928	0.97	65.31	42.74	43	527	122	160	55718	280
2022-05-05	SRR19048678	IonTorrent	764218	760681	99.54	4411532	65.61	4350452	0.99	65.44	38.19	39	4266761	0.97	65.3	38.76	39	794	225	159	61080	419
2022-05-05	SRR19048679	IonTorrent	829050	821218	99.06	4411532	65.61	4342762	0.98	65.42	42.48	43	4271697	0.97	65.27	43.03	43	543	134	144	68770	290
2022-05-05	SRR19048680	IonTorrent	1120480	1032350	92.13	4411532	65.61	4359646	0.99	65.48	49.74	50	4300221	0.97	65.33	50.32	50	538	193	66	51886	303
2022-05-05	SRR19048681	IonTorrent	1238406	1114445	89.99	4411532	65.61	4378222	0.99	65.5	53.29	53	4317556	0.98	65.34	53.93	53	988	229	92	33310	498
2022-05-05	SRR19048682	IonTorrent	1116905	1076584	96.39	4411532	65.61	4370208	0.99	65.49	47.22	47	4308549	0.98	65.33	47.79	47	539	112	51	41324	288
2022-05-05	SRR19048683	IonTorrent	909231	895083	98.44	4411532	65.61	4359260	0.99	65.52	37.37	31	4241171	0.96	65.3	38.18	31	912	119	104	52272	461
2022-05-05	SRR19048684	IonTorrent	683621	653959	95.66	4411532	65.61	4378562	0.99	65.53	27.66	27	4250769	0.96	65.29	28.23	28	2028	302	179	32970	1090
2022-05-05	SRR19048685	IonTorrent	817340	811774	99.32	4411532	65.61	4332347	0.98	65.44	38.28	39	4260942	0.97	65.29	38.77	39	1412	205	202	79185	752
2022-05-05	SRR19048686	IonTorrent	912846	907626	99.43	4411532	65.61	4345799	0.99	65.47	45.23	46	4285440	0.97	65.31	45.76	46	916	240	100	65733	471
2022-05-05	SRR19048687	IonTorrent	1485028	1475471	99.36	4411532	65.61	4356385	0.99	65.48	73.72	75	4308472	0.98	65.34	74.46	75	572	75	54	55147	300
2022-05-05	SRR19048688	IonTorrent	1241455	1091551	87.93	4411532	65.61	4292065	0.97	65.3	47.32	50	4125927	0.94	64.91	48.98	51	2032	309	152	119467	1085
2022-05-05	SRR19048689	IonTorrent	1283486	1190858	92.78	4411532	65.61	4364485	0.99	65.48	57.09	58	4313269	0.98	65.36	57.67	58	540	169	51	47047	294
2022-05-05	SRR19048690	IonTorrent	1663134	1614334	97.07	4411532	65.61	4358135	0.99	65.45	73.11	74	4305036	0.98	65.33	73.92	75	981	165	77	53397	513
2022-05-05	SRR19048691	IonTorrent	1877002	1860295	99.11	4411532	65.61	4364099	0.99	65.47	89.76	91	4319867	0.98	65.36	90.6	91	967	268	88	47433	490
2022-05-05	SRR19048692	IonTorrent	1231723	1208090	98.08	4411532	65.61	4366043	0.99	65.47	53.42	54	4307194	0.98	65.32	54.06	54	986	197	85	45489	501
2022-05-05	SRR19048693	IonTorrent	1199417	1050165	87.56	4411532	65.61	4348708	0.99	65.43	43.19	44	4281138	0.97	65.24	43.76	44	786	115	104	62824	419
2022-05-05	SRR19048694	IonTorrent	849642	836694	98.48	4411532	65.61	4339124	0.98	65.45	35.27	35	4247813	0.96	65.27	35.87	36	788	130	71	72408	413
2022-05-05	SRR19048695	IonTorrent	1164421	1154237	99.13	4411532	65.61	4349127	0.99	65.42	53.56	55	4259072	0.97	65.24	54.56	55	939	270	121	62405	477
2022-05-05	SRR19048696	IonTorrent	2395437	2378557	99.3	4411532	65.61	4322768	0.98	65.44	125.42	130	4274120	0.97	65.32	126.75	131	859	279	99	88764	451
2022-05-05	SRR19048697	IonTorrent	1326799	1316681	99.24	4411532	65.61	4341036	0.98	65.42	67.78	70	4284658	0.97	65.29	68.57	70	909	309	108	70496	472
2022-05-05	SRR19048698	IonTorrent	1166831	1158555	99.29	4411532	65.61	4332934	0.98	65.4	52.77	54	4258073	0.97	65.2	53.57	54	1362	315	122	78598	721
2022-05-05	SRR19048699	IonTorrent	1545800	1535355	99.32	4411532	65.61	4346051	0.99	65.42	73.29	75	4288254	0.97	65.26	74.17	75	1419	425	135	65481	762
2022-05-05	SRR19048700	IonTorrent	1061575	876873	82.6	4411532	65.61	4355590	0.99	65.51	39.52	40	4278827	0.97	65.33	40.11	40	946	132	99	55942	493
2022-05-05	SRR19048701	IonTorrent	1841508	1822304	98.96	4411532	65.61	4347886	0.99	65.46	84.59	87	4299610	0.97	65.31	85.46	87	822	296	100	63646	424
2022-05-05	SRR19048702	IonTorrent	1735337	1724114	99.35	4411532	65.61	4365976	0.99	65.48	69.32	71	4316512	0.98	65.33	70.04	71	540	223	57	45556	285
2022-05-05	SRR19048703	IonTorrent	2276407	2263470	99.43	4411532	65.61	4368242	0.99	65.48	94.29	96	4320707	0.98	65.33	95.25	97	528	154	44	43290	290
2022-05-05	SRR19048704	IonTorrent	1387228	1367710	98.59	4411532	65.61	4350589	0.99	65.46	60.3	61	4300333	0.97	65.32	60.92	62	2164	332	217	60943	1167
2022-05-05	SRR19048705	IonTorrent	2574076	2419184	93.98	4411532	65.61	4338143	0.98	65.48	109.46	111	4293293	0.97	65.35	110.52	112	928	214	84	73389	465
2022-05-05	SRR19048706	IonTorrent	1118387	1105206	98.82	4411532	65.61	4329701	0.98	65.41	50.95	52	4255918	0.96	65.21	51.71	52	908	180	110	81831	463
2022-05-05	SRR19048707	IonTorrent	923913	862745	93.38	4411532	65.61	4317111	0.98	65.42	37.16	37	4208841	0.95	65.18	37.92	38	885	135	76	94421	450
2022-05-05	SRR19048708	IonTorrent	1767470	1741316	98.52	4411532	65.61	4350296	0.99	65.49	74.94	77	4290236	0.97	65.32	75.89	77	921	206	96	61236	467
2022-05-05	SRR19048709	IonTorrent	1850114	1769248	95.63	4411532	65.61	4381940	0.99	65.55	76.71	77	4344131	0.98	65.44	77.31	78	534	131	61	29592	280
2022-05-05	SRR19048710	IonTorrent	2124047	2101850	98.95	4411532	65.61	4370807	0.99	65.57	93.84	95	4331360	0.98	65.46	94.62	96	947	316	102	40725	487
2022-05-05	SRR19048711	IonTorrent	1353353	1337452	98.83	4411532	65.61	4352319	0.99	65.51	65.51	66	4299636	0.97	65.36	66.22	66	1477	278	163	59213	770
2022-05-05	SRR19048712	IonTorrent	1168281	1161317	99.4	4411532	65.61	4365247	0.99	65.52	51.12	52	4317344	0.98	65.39	51.6	52	919	118	94	46285	471
2022-05-05	SRR19048713	IonTorrent	1696791	1663565	98.04	4411532	65.61	4329232	0.98	65.51	76.6	78	4286933	0.97	65.4	77.27	78	2217	396	194	82300	1197
2022-05-05	SRR19048714	IonTorrent	1636363	1623301	99.2	4411532	65.61	4377817	0.99	65.54	73.42	74	4334676	0.98	65.42	74.08	74	1462	334	158	33715	782
2022-05-05	SRR19048715	IonTorrent	1614074	1427702	88.45	4411532	65.61	4373044	0.99	65.55	65.29	65	4329931	0.98	65.43	65.86	66	989	255	113	38488	491
2022-05-05	SRR19048716	IonTorrent	789549	781734	99.01	4411532	65.61	4318032	0.98	65.44	33.2	34	4223222	0.96	65.24	33.78	34	2229	327	183	93500	1217
2022-05-05	SRR19048717	IonTorrent	1011784	1005636	99.39	4411532	65.61	4341653	0.98	65.44	44.9	46	4276736	0.97	65.29	45.47	46	532	149	57	69879	291
2022-05-05	SRR19048718	IonTorrent	3166024	3146989	99.4	4411532	65.61	4352040	0.99	65.43	141.61	147	4306993	0.98	65.3	142.99	148	550	217	52	59492	286
2022-05-05	SRR19048719	IonTorrent	933194	907497	97.25	4411532	65.61	4330047	0.98	65.4	40.35	41	4227824	0.96	65.18	41.12	41	2070	329	216	81485	1124
2022-05-05	SRR19048720	IonTorrent	966899	954978	98.77	4411532	65.61	4342897	0.98	65.41	46.74	47	4273405	0.97	65.23	47.39	47	913	300	119	68635	459
2022-05-05	SRR19048721	IonTorrent	1065557	1051972	98.73	4411532	65.61	4339349	0.98	65.4	52.63	53	4278119	0.97	65.23	53.28	53	1371	325	160	72183	737
2022-05-05	SRR19048722	IonTorrent	1567558	1556493	99.29	4411532	65.61	4353017	0.99	65.46	67.46	69	4301843	0.98	65.31	68.19	69	551	70	124	58515	298
2022-05-05	SRR19048723	IonTorrent	1330801	1324536	99.53	4411532	65.61	4348989	0.99	65.42	69.98	70	4301923	0.98	65.29	70.65	70	369	63	22	62543	180
2022-05-05	SRR19048724	IonTorrent	1407133	1396055	99.21	4411532	65.61	4351552	0.99	65.44	62.41	63	4299493	0.97	65.29	63.08	63	916	138	158	59980	470
2022-05-05	SRR19048725	IonTorrent	1077928	1070232	99.29	4411532	65.61	4326158	0.98	65.42	59.59	60	4269994	0.97	65.27	60.27	60	940	309	117	85374	491
2022-05-05	SRR19048726	IonTorrent	1104966	1075835	97.36	4411532	65.61	4342646	0.98	65.48	52.67	53	4280556	0.97	65.33	53.31	53	535	178	72	68886	294
2022-05-05	SRR19048727	IonTorrent	1110859	1103383	99.33	4411532	65.61	4346045	0.99	65.43	50.46	51	4292289	0.97	65.28	51	51	539	126	55	65487	285
2022-05-05	SRR19048728	IonTorrent	933329	926380	99.26	4411532	65.61	4335365	0.98	65.39	45.83	46	4262819	0.97	65.22	46.49	46	538	120	60	76167	292
2022-05-05	SRR19048729	IonTorrent	1274953	1263695	99.12	4411532	65.61	4307234	0.98	65.4	69.55	70	4258306	0.97	65.27	70.25	70	2251	351	205	104298	1217
2022-05-05	SRR19048730	IonTorrent	1772583	1758555	99.21	4411532	65.61	4325390	0.98	65.42	86	87	4286135	0.97	65.31	86.68	87	1441	383	134	86142	759
2022-05-05	SRR19048731	IonTorrent	1026299	253764	24.73	4411532	65.61	421784	0.1	45.19	1.99	1	0	0	0	0	0	0	0	0	3989748	0
2022-05-05	SRR19048732	IonTorrent	1318130	1310250	99.4	4411532	65.61	4327544	0.98	65.43	63.73	65	4284205	0.97	65.31	64.29	65	1434	297	198	83988	761
2022-05-05	SRR19048733	IonTorrent	1417275	1408994	99.42	4411532	65.61	4328583	0.98	65.44	65.21	66	4288364	0.97	65.32	65.75	66	1426	276	176	82949	753
2022-05-05	SRR19048734	IonTorrent	1123886	1117954	99.47	4411532	65.61	4352223	0.99	65.46	49.54	50	4303187	0.98	65.32	50.02	50	545	192	79	59309	304
2022-05-05	SRR19048735	IonTorrent	834978	829049	99.29	4411532	65.61	4319422	0.98	65.41	44.63	45	4253126	0.96	65.25	45.21	45	1412	305	203	92110	753
2022-05-05	SRR19048736	IonTorrent	1643273	1633065	99.38	4411532	65.61	4344418	0.98	65.41	89.64	91	4305973	0.98	65.31	90.36	91	543	213	63	67114	285
2022-05-05	SRR19048737	IonTorrent	1080395	1071744	99.2	4411532	65.61	4348011	0.99	65.46	50.33	51	4291632	0.97	65.32	50.9	51	893	200	84	63521	460
2022-05-05	SRR19048738	IonTorrent	1642680	1627863	99.1	4411532	65.61	4325409	0.98	65.41	91.11	92	4283871	0.97	65.31	91.9	92	1454	377	187	86123	768
2022-05-05	SRR19048739	IonTorrent	1173081	1158947	98.8	4411532	65.61	4332630	0.98	65.41	63.8	65	4277940	0.97	65.29	64.51	65	925	279	68	78902	476
2022-05-05	SRR19048740	IonTorrent	1274726	1264104	99.17	4411532	65.61	4322532	0.98	65.41	68.25	69	4276986	0.97	65.3	68.89	69	1459	289	146	89000	770
2022-05-05	SRR19048741	IonTorrent	1485604	1476847	99.41	4411532	65.61	4334897	0.98	65.45	79.62	80	4293364	0.97	65.34	80.31	80	1453	301	188	76635	762
2022-05-05	SRR19048742	IonTorrent	731160	725562	99.23	4411532	65.61	4311996	0.98	65.39	45.84	46	4227739	0.96	65.19	46.59	46	1379	369	197	99536	736
2022-05-05	SRR19048743	IonTorrent	1240612	1234612	99.52	4411532	65.61	4350234	0.99	65.44	59.33	60	4303996	0.98	65.32	59.89	60	808	249	145	61298	429
2022-05-05	SRR19048744	IonTorrent	1146501	1136806	99.15	4411532	65.61	4330253	0.98	65.44	54.01	54	4274518	0.97	65.29	54.62	54	1415	347	163	81279	755
2022-05-05	SRR19048745	IonTorrent	1171348	1159701	99.01	4411532	65.61	4327773	0.98	65.43	56.37	57	4279135	0.97	65.3	56.93	57	1422	301	159	83759	755
2022-05-05	SRR19048746	IonTorrent	1324933	1277836	96.45	4411532	65.61	4329949	0.98	65.44	62.3	62	4282881	0.97	65.31	62.9	63	1417	361	158	81583	756
2022-05-05	SRR19048747	IonTorrent	1087289	1081727	99.49	4411532	65.61	4334737	0.98	65.46	52.37	53	4285468	0.97	65.32	52.89	53	1447	193	158	76795	778
2022-05-05	SRR19048748	IonTorrent	1104504	1093785	99.03	4411532	65.61	4352402	0.99	65.45	53.62	54	4290893	0.97	65.28	54.28	54	950	250	78	59130	476
2022-05-05	SRR19048749	IonTorrent	724996	719449	99.23	4411532	65.61	4314402	0.98	65.39	43.51	44	4237393	0.96	65.21	44.15	44	1393	369	125	97130	748
2022-05-05	SRR19048750	IonTorrent	2187129	2174028	99.4	4411532	65.61	4355473	0.99	65.49	105.91	108	4317289	0.98	65.37	106.77	108	950	283	97	56059	494
2022-05-05	SRR19048751	IonTorrent	1074639	1066329	99.23	4411532	65.61	4343539	0.98	65.45	51.43	51	4293782	0.97	65.32	51.94	51	919	207	113	67993	466
2022-05-05	SRR19048752	IonTorrent	1185172	1177121	99.32	4411532	65.61	4341584	0.98	65.46	58.28	59	4293201	0.97	65.33	58.85	59	958	297	89	69948	487
2022-05-05	SRR19048753	IonTorrent	2128375	2117172	99.47	4411532	65.61	4358047	0.99	65.5	98.41	100	4310308	0.98	65.35	99.42	101	871	331	97	53485	454
2022-05-05	SRR19048754	IonTorrent	2346271	2334862	99.51	4411532	65.61	4343026	0.98	65.45	126.64	130	4306031	0.98	65.34	127.64	130	546	207	59	68506	296
2022-05-05	SRR19048755	IonTorrent	1057039	1026486	97.11	4411532	65.61	4328287	0.98	65.45	53.02	54	4269851	0.97	65.3	53.64	54	915	306	100	83245	478
2022-05-05	SRR19048756	IonTorrent	1204111	1150517	95.55	4411532	65.61	4332026	0.98	65.49	52.17	53	4270170	0.97	65.32	52.83	53	831	231	78	79506	424
2022-05-05	SRR19048757	IonTorrent	1742629	1716535	98.5	4411532	65.61	4351108	0.99	65.5	82.72	84	4304739	0.98	65.36	83.54	84	1480	359	154	60424	771
2022-05-05	SRR19048758	IonTorrent	648680	644262	99.32	4411532	65.61	4365404	0.99	65.46	32.17	32	4265835	0.97	65.23	32.75	33	971	218	118	46128	495
2022-05-05	SRR19048759	IonTorrent	2436725	2420566	99.34	4411532	65.61	4358901	0.99	65.53	118.03	120	4315250	0.98	65.39	119.13	121	1474	284	154	52631	783
2022-05-05	SRR19048760	IonTorrent	802374	793597	98.91	4411532	65.61	4346104	0.99	65.48	37.76	38	4269778	0.97	65.3	38.3	38	2102	263	195	65428	1130
2022-05-05	SRR19048761	IonTorrent	839733	835766	99.53	4411532	65.61	4349091	0.99	65.47	40.89	41	4280974	0.97	65.3	41.42	41	872	242	113	62441	452
2022-05-05	SRR19048762	IonTorrent	1548976	1538973	99.35	4411532	65.61	4347830	0.99	65.46	79.41	81	4295444	0.97	65.32	80.28	81	920	322	114	63702	467
2022-05-05	SRR19048763	IonTorrent	2393331	2374494	99.21	4411532	65.61	4352233	0.99	65.51	117.72	121	4306940	0.98	65.37	118.87	121	918	290	110	59299	488
2022-05-05	SRR19048764	IonTorrent	1242502	1235311	99.42	4411532	65.61	4332934	0.98	65.39	62.17	64	4264112	0.97	65.21	63.04	64	1412	306	129	78598	756
2022-05-05	SRR19048765	IonTorrent	1385893	1376584	99.33	4411532	65.61	4340656	0.98	65.44	63.24	65	4284682	0.97	65.3	63.98	65	932	272	84	70876	483
2022-05-05	SRR19048766	IonTorrent	1007684	953939	94.67	4411532	65.61	4344742	0.98	65.46	47.8	48	4281077	0.97	65.3	48.4	48	855	322	142	66790	450
2022-05-05	SRR19048767	IonTorrent	1304387	1295978	99.36	4411532	65.61	4361187	0.99	65.5	56	57	4304718	0.98	65.34	56.65	57	921	119	108	50345	468
2022-05-05	SRR19048768	IonTorrent	1328873	1315242	98.97	4411532	65.61	4326773	0.98	65.41	61.96	63	4262684	0.97	65.26	62.79	63	934	278	121	84759	491
2022-05-05	SRR19048769	IonTorrent	1168534	1130301	96.73	4411532	65.61	4278169	0.97	65.48	50.52	51	4202751	0.95	65.33	51.3	51	2367	379	230	133363	1298
2022-05-05	SRR19048770	IonTorrent	2514076	2488017	98.96	4411532	65.61	4374951	0.99	65.55	106.4	108	4324228	0.98	65.45	107.55	108	987	257	100	36581	519
2022-05-05	SRR19048771	IonTorrent	1385018	1378867	99.56	4411532	65.61	4308950	0.98	65.41	62.77	64	4244989	0.96	65.24	63.61	64	807	230	84	102582	403
2022-05-05	SRR19048772	IonTorrent	2032402	2012814	99.04	4411532	65.61	4334694	0.98	65.43	82.8	85	4285547	0.97	65.3	83.67	86	927	105	91	76838	483
2022-05-05	SRR19048773	IonTorrent	1220739	1211227	99.22	4411532	65.61	4365825	0.99	65.45	50.12	51	4302886	0.98	65.28	50.76	51	504	148	57	45707	272
2022-05-05	SRR19048774	IonTorrent	1507315	1492463	99.01	4411532	65.61	4315398	0.98	65.37	66.9	68	4211972	0.95	65.1	68.37	69	2074	332	207	96134	1126
2022-05-05	SRR19048775	IonTorrent	796153	790389	99.28	4411532	65.61	4330042	0.98	65.4	33.08	33	4150746	0.94	65.12	33.99	33	499	99	67	81490	276
2022-05-05	SRR19048776	IonTorrent	974528	968691	99.4	4411532	65.61	4338802	0.98	65.45	42.94	43	4272573	0.97	65.31	43.49	44	802	119	113	72730	414
2022-05-05	SRR19048777	IonTorrent	1206122	1197775	99.31	4411532	65.61	4365123	0.99	65.48	55.17	56	4311189	0.98	65.34	55.79	56	800	137	98	46409	426
2022-05-05	SRR19048778	IonTorrent	1209474	1200366	99.25	4411532	65.61	4337345	0.98	65.44	52.81	53	4276253	0.97	65.28	53.46	53	928	150	74	74187	472
2022-05-05	SRR19048779	IonTorrent	899761	894056	99.37	4411532	65.61	4352627	0.99	65.43	40.58	41	4270772	0.97	65.22	41.23	41	554	97	63	58905	318
2022-05-05	SRR19048780	IonTorrent	845088	838826	99.26	4411532	65.61	4358355	0.99	65.45	39.73	40	4293219	0.97	65.3	40.23	40	539	98	73	53177	304
2022-05-05	SRR19048781	IonTorrent	1154543	1146296	99.29	4411532	65.61	4343850	0.98	65.46	53.77	54	4285289	0.97	65.32	54.38	54	807	140	101	67682	420
2022-05-05	SRR19048782	IonTorrent	731727	570813	78.01	4411532	65.61	4337319	0.98	65.42	25.24	25	4182742	0.95	65.16	25.86	26	817	286	94	74213	418
2022-05-05	SRR19048783	IonTorrent	3697901	2529215	68.4	4411532	65.61	4366425	0.99	65.57	105.68	107	4325855	0.98	65.43	106.58	107	1529	225	155	45107	791
2022-05-05	SRR19048784	IonTorrent	811974	767980	94.58	4411532	65.61	4374312	0.99	65.56	30.21	30	4292929	0.97	65.38	30.64	31	828	119	74	37220	451
2022-05-05	SRR19048785	IonTorrent	754253	746222	98.94	4411532	65.61	4370663	0.99	65.53	30.27	30	4269953	0.97	65.33	30.82	31	2051	210	172	40869	1119
2022-05-05	SRR19048786	IonTorrent	562673	551215	97.96	4411532	65.61	4350086	0.99	65.47	24.72	25	4205807	0.95	65.24	25.28	25	724	131	60	61446	391
2022-05-05	SRR19048787	IonTorrent	407526	396270	97.24	4411532	65.61	4371005	0.99	65.49	17.69	18	3964531	0.9	65.26	18.52	18	469	83	67	40527	237
2022-05-05	SRR19048788	IonTorrent	1168621	1158459	99.13	4411532	65.61	4346366	0.99	65.47	52.94	53	4299527	0.97	65.35	53.43	53	853	273	90	65166	447
2022-05-05	SRR19048791	IonTorrent	1422418	1399067	98.36	4411532	65.61	4356493	0.99	65.55	60.12	61	4293023	0.97	65.37	60.91	61	1445	228	149	55039	768
2022-05-05	SRR19048792	IonTorrent	840021	831787	99.02	4411532	65.61	4373672	0.99	65.51	36.8	37	4287990	0.97	65.3	37.41	37	909	120	100	37860	462
2022-05-05	SRR19048793	IonTorrent	1440702	1396301	96.92	4411532	65.61	4366290	0.99	65.52	63.53	64	4309348	0.98	65.35	64.28	64	1390	351	136	45242	745
2022-05-05	SRR19048794	IonTorrent	3625718	3552849	97.99	4411532	65.61	4387632	0.99	65.59	139.82	143	4357961	0.99	65.49	140.69	143	868	229	88	23900	454
2022-05-05	SRR19048795	IonTorrent	282024	276424	98.01	4411532	65.61	4362676	0.99	65.47	12.17	12	2974385	0.67	65.07	13.93	14	339	53	38	48856	176
2022-05-05	SRR19048796	IonTorrent	2531521	2506264	99	4411532	65.61	4349710	0.99	65.43	101.73	103	4301325	0.98	65.28	102.73	103	349	61	29	61822	174
2022-05-05	SRR19048797	IonTorrent	2556540	2516780	98.44	4411532	65.61	4354148	0.99	65.44	97.86	99	4311721	0.98	65.31	98.69	100	861	146	67	57384	443
2022-05-05	SRR19048798	IonTorrent	2474757	2443176	98.72	4411532	65.61	4371423	0.99	65.5	86.81	88	4326749	0.98	65.35	87.59	88	564	93	53	40109	283
2022-05-05	SRR19048799	IonTorrent	2567913	2534536	98.7	4411532	65.61	4351611	0.99	65.49	108.23	109	4310956	0.98	65.36	109.17	109	837	215	86	59921	455
2022-05-05	SRR19048800	IonTorrent	974340	965712	99.11	4411532	65.61	4326112	0.98	65.42	58.42	58	4262481	0.97	65.25	59.16	59	906	308	135	85420	455
2022-05-05	SRR19048801	IonTorrent	2111951	2091819	99.05	4411532	65.61	4360552	0.99	65.51	83.29	84	4318273	0.98	65.38	84.02	84	949	163	83	50980	489
2022-05-05	SRR19048802	IonTorrent	1655302	1645895	99.43	4411532	65.61	4365956	0.99	65.55	70.71	71	4321318	0.98	65.41	71.37	71	1473	229	140	45576	780
2022-05-05	SRR19048803	IonTorrent	1310627	1281757	97.8	4411532	65.61	4364368	0.99	65.5	54.45	55	4311310	0.98	65.35	55.03	55	832	164	59	47164	436
2022-05-05	SRR19048804	IonTorrent	1247074	1235752	99.09	4411532	65.61	4331155	0.98	65.4	69.79	71	4261374	0.97	65.22	70.77	71	943	319	142	80377	474
2022-05-05	SRR19048805	IonTorrent	2403327	2388916	99.4	4411532	65.61	4345079	0.98	65.44	131.81	134	4291830	0.97	65.29	133.27	135	855	269	140	66453	448
2022-05-05	SRR19048806	IonTorrent	961312	943846	98.18	4411532	65.61	4345758	0.99	65.42	50.81	51	4269619	0.97	65.22	51.55	51	522	198	102	65774	289
2022-05-05	SRR19048807	IonTorrent	2154067	2137466	99.23	4411532	65.61	4350304	0.99	65.48	114.37	116	4291926	0.97	65.31	115.77	117	943	279	96	61228	478
2022-05-05	SRR19048808	IonTorrent	604310	595334	98.51	4411532	65.61	4326751	0.98	65.4	31.98	32	4192270	0.95	65.12	32.73	32	772	150	130	84781	401
2022-05-05	SRR19048809	IonTorrent	1119517	1101015	98.35	4411532	65.61	4330266	0.98	65.41	58.04	59	4273807	0.97	65.26	58.7	60	535	224	62	81266	278
2022-05-05	SRR19048810	IonTorrent	433644	431117	99.42	4411532	65.61	4283770	0.97	65.35	24.6	25	4072324	0.92	65	25.46	25	1302	240	191	127762	701
2022-05-05	SRR19048811	IonTorrent	2044133	2035287	99.57	4411532	65.61	4328019	0.98	65.39	116.56	120	4289194	0.97	65.28	117.51	120	556	179	101	83513	304
2022-05-05	SRR19048812	IonTorrent	1820336	1804889	99.15	4411532	65.61	4299681	0.97	65.39	101.86	105	4251460	0.96	65.27	102.91	106	860	218	94	111851	434
2022-05-05	SRR19048813	IonTorrent	1908174	1836797	96.26	4411532	65.61	4336022	0.98	65.4	101.59	105	4290627	0.97	65.28	102.55	105	914	330	147	75510	461
2022-05-05	SRR19048814	IonTorrent	2314004	2282347	98.63	4411532	65.61	4367657	0.99	65.5	102.74	104	4319910	0.98	65.35	103.79	104	1425	247	137	43875	764
2022-05-05	SRR19048815	IonTorrent	1810684	1784122	98.53	4411532	65.61	4319098	0.98	65.47	97.34	98	4270992	0.97	65.33	98.34	99	868	158	99	92434	455
2022-05-05	SRR19048816	IonTorrent	1122970	1117314	99.5	4411532	65.61	4363927	0.99	65.47	55.03	56	4299950	0.97	65.3	55.75	56	526	179	49	47605	281
2022-05-05	SRR19048817	IonTorrent	1771248	1737867	98.12	4411532	65.61	4366193	0.99	65.48	90.72	92	4315452	0.98	65.33	91.69	92	809	174	137	45339	418
2022-05-05	SRR19048818	IonTorrent	1892605	1877814	99.22	4411532	65.61	4323751	0.98	65.46	98.77	100	4272910	0.97	65.31	99.84	101	2254	505	214	87781	1231
2022-05-05	SRR19048819	IonTorrent	1313709	1307891	99.56	4411532	65.61	4344843	0.98	65.45	72.81	74	4296498	0.97	65.31	73.53	74	876	282	138	66689	454
2022-05-05	SRR19048820	IonTorrent	1630118	1619116	99.33	4411532	65.61	4363832	0.99	65.47	88.36	90	4318810	0.98	65.35	89.18	90	784	173	104	47700	402
2022-05-05	SRR19048821	IonTorrent	1225570	1216704	99.28	4411532	65.61	4354196	0.99	65.45	67.69	69	4305466	0.98	65.31	68.37	69	532	174	60	57336	282
2022-05-05	SRR19048822	IonTorrent	1249920	1239679	99.18	4411532	65.61	4338960	0.98	65.45	67.84	69	4291240	0.97	65.32	68.5	69	2180	448	221	72572	1180
2022-05-05	SRR19048823	IonTorrent	1757831	1745861	99.32	4411532	65.61	4362960	0.99	65.5	92.76	94	4313261	0.98	65.36	93.73	94	934	284	103	48572	493
2022-05-05	SRR19048824	IonTorrent	1260715	1253308	99.41	4411532	65.61	4341818	0.98	65.43	70.4	70	4283113	0.97	65.28	71.26	70	758	144	83	69714	407
2022-05-05	SRR19048825	IonTorrent	1629762	1551388	95.19	4411532	65.61	4344471	0.98	65.46	73.98	75	4298217	0.97	65.33	74.69	75	920	213	113	67061	456
2022-05-05	SRR19048826	IonTorrent	1622281	1598296	98.52	4411532	65.61	4365449	0.99	65.49	72.83	74	4319568	0.98	65.35	73.52	74	520	122	60	46083	277
2022-05-05	SRR19048827	IonTorrent	1607749	1586825	98.7	4411532	65.61	4372353	0.99	65.49	71.67	73	4325652	0.98	65.36	72.36	73	2090	376	192	39179	1125
2022-06-09	IT2778	240522	3806671	1274761	33.49	4411532	65.61	4385122	0.99	65.49	36.64	37	4369905	0.99	65.47	36.75	37	14020	1433	599	26410	7256
2022-06-09	IT2781	240522	2710891	1208837	44.59	4411532	65.61	4372015	0.99	65.48	33.79	34	4355353	0.99	65.45	33.9	34	15602	1683	564	39517	8573
2022-06-09	IT2852	240522	3803478	959091	25.22	4411532	65.61	4366931	0.99	65.35	26.44	26	4326811	0.98	65.29	26.64	26	14498	1260	413	44601	8057
2022-06-09	IT2875	240522	6267760	2438394	38.9	4411532	65.61	4389227	0.99	65.59	66.75	67	4379917	0.99	65.57	66.88	67	6190	654	362	22305	2306
2022-06-09	IT2881	240522	5457876	4119349	75.48	4411532	65.61	4393151	1	65.6	113.84	117	4387893	0.99	65.58	113.97	117	2597	518	330	18381	1131
2022-06-09	IT2886	240522	3910003	2819863	72.12	4411532	65.61	4399100	1	65.58	82.34	84	4385607	0.99	65.55	82.58	84	2885	378	284	12432	1207
2022-06-09	IT2887	240522	6361922	4906947	77.13	4411532	65.61	4404660	1	65.61	132.21	136	4401604	1	65.6	132.29	136	1999	379	203	6872	983
2022-06-09	IT2889	240522	4781756	1339060	28	4411532	65.61	4385324	0.99	65.5	38.36	38	4364652	0.99	65.47	38.52	39	13380	1037	668	26208	5651
2022-06-09	IT2891	240522	5912173	5139950	86.94	4411532	65.61	4396077	1	65.61	138.82	142	4393469	1	65.6	138.9	142	1927	292	192	15455	970
2022-06-09	IT2896	240522	5715611	4290745	75.07	4411532	65.61	4405228	1	65.61	120.09	122	4401669	1	65.6	120.18	122	2020	410	227	6304	910
2022-06-09	IT2898	240522	5079786	2033900	40.04	4411532	65.61	4384169	0.99	65.56	54.68	55	4375096	0.99	65.54	54.78	55	7362	786	306	27363	3104
2022-06-09	IT2978	240522	1208431	903241	74.74	4411532	65.61	4395295	1	65.54	25.9	25	4369479	0.99	65.51	26.01	25	8106	1017	347	16237	4679
2022-06-09	IT2986	240522	1094979	864374	78.94	4411532	65.61	4398602	1	65.55	23.7	23	4377067	0.99	65.53	23.79	23	9537	1035	332	12930	5480
2022-06-09	IT2992	240522	2561017	1975761	77.15	4411532	65.61	4381514	0.99	65.6	60.32	61	4370936	0.99	65.58	60.45	61	2752	473	314	30018	1378
2022-06-09	IT3058	200522	2439066	2099545	86.08	4411532	65.61	4366274	0.99	65.58	61.09	53	4348917	0.99	65.54	61.3	53	4945	636	310	45258	2681
2022-06-09	IT3059	200522	2558813	1906924	74.52	4411532	65.61	4391078	1	65.61	54.19	52	4377521	0.99	65.58	54.32	52	5191	535	318	20454	2600
2022-06-09	IT3060	200522	2439129	1519380	62.29	4411532	65.61	4386526	0.99	65.59	41.34	41	4369686	0.99	65.56	41.47	41	8491	854	451	25006	4442
2022-06-09	IT3063	200522	3004909	1391117	46.29	4411532	65.61	4390963	1	65.58	37.13	35	4375483	0.99	65.54	37.24	35	11392	1283	478	20569	5941
2022-06-09	IT3068	200522	3392222	2514461	74.12	4411532	65.61	4361942	0.99	65.55	73.12	71	4343437	0.98	65.51	73.41	71	4299	785	397	49590	2126
2022-06-09	IT3070	200522	3305773	2440696	73.83	4411532	65.61	4371215	0.99	65.55	70.14	66	4353340	0.99	65.5	70.4	66	4005	335	330	40317	1995
2022-06-09	IT3073	200522	2040017	1348027	66.08	4411532	65.61	4360587	0.99	65.47	37.41	38	4324514	0.98	65.41	37.68	38	8304	961	566	50945	4377
2022-06-09	IT3074	200522	3144034	1794963	57.09	4411532	65.61	4386319	0.99	65.6	51.3	51	4368474	0.99	65.55	51.48	51	5629	542	350	25213	2537
2022-06-09	IT3076	200522	1733941	1176403	67.85	4411532	65.61	4389252	0.99	65.55	31.39	31	4360840	0.99	65.49	31.56	31	8877	1048	457	22280	4917
2022-06-09	IT3077	240522	1582217	973400	61.52	4411532	65.61	4380609	0.99	65.55	24.39	24	4352159	0.99	65.5	24.52	24	11909	1077	381	30923	6307
2022-06-09	IT3080	200522	3019336	1522633	50.43	4411532	65.61	4390235	1	65.59	40.84	40	4376650	0.99	65.57	40.95	40	9299	968	412	21297	4593
2022-06-09	IT3081	200522	2498482	1518637	60.78	4411532	65.61	4383315	0.99	65.6	43.12	43	4370037	0.99	65.58	43.22	43	6704	808	392	28217	3399
2022-06-09	IT3090	200522	2707060	1701120	62.84	4411532	65.61	4391855	1	65.59	49.44	50	4374309	0.99	65.55	49.6	50	4435	682	354	19677	2144
2022-06-09	IT3093	200522	2925729	1825928	62.41	4411532	65.61	4393266	1	65.57	50.43	47	4378896	0.99	65.54	50.58	47	7486	1039	474	18266	3808
2022-06-09	IT3097	200522	2427811	1840678	75.82	4411532	65.61	4374120	0.99	65.55	52.58	52	4351076	0.99	65.5	52.83	52	5768	785	486	37412	2884
2022-06-09	IT3101	200522	3538909	2277765	64.36	4411532	65.61	4398505	1	65.61	66.44	57	4385805	0.99	65.58	66.61	57	4590	541	254	13027	2152
2022-06-09	IT3111	240522	4457247	2827414	63.43	4411532	65.61	4387180	0.99	65.6	80.46	74	4376811	0.99	65.57	80.63	74	4549	525	271	24352	1879
2022-06-09	IT3204	200522	2829485	2703848	95.56	4411532	65.61	4389491	1	65.61	78.34	78	4376497	0.99	65.58	78.55	78	3716	300	308	22041	1856
2022-06-09	IT3205	240522	4876538	4704124	96.46	4411532	65.61	4404417	1	65.6	140.53	143	4390377	1	65.56	140.95	143	3644	452	379	7115	1884
2022-06-09	IT3207	200522	3889316	3665102	94.24	4411532	65.61	4395463	1	65.61	107.3	107	4382999	0.99	65.57	107.59	107	3918	342	267	16069	1835
2022-06-09	IT3208	200522	3212232	3053996	95.07	4411532	65.61	4382178	0.99	65.58	92.76	93	4365705	0.99	65.53	93.08	93	3243	231	222	29354	1632
2022-06-09	IT3209	200522	4264316	3887947	91.17	4411532	65.61	4389341	0.99	65.6	116.06	115	4376796	0.99	65.56	116.38	115	3659	181	124	22191	1712
2022-06-09	IT3210	200522	3492811	3213250	92	4411532	65.61	4386761	0.99	65.6	92.79	94	4375321	0.99	65.57	93.02	94	4555	445	292	24771	2104
2022-06-09	IT3211	200522	4319326	3772493	87.34	4411532	65.61	4391510	1	65.6	106.98	104	4382006	0.99	65.57	107.19	104	4833	400	240	20022	2051
2022-06-09	IT3212	240522	1223289	1166180	95.33	4411532	65.61	4260705	0.97	65.29	32.46	32	4234987	0.96	65.26	32.64	32	21055	1208	562	150827	11782
2022-06-09	IT3213	240522	6195017	5597996	90.36	4411532	65.61	4356951	0.99	65.61	164.1	163	4352608	0.99	65.6	164.26	164	2786	549	278	54581	1368
2022-06-09	IT3215	240522	5459718	5140775	94.16	4411532	65.61	4375741	0.99	65.6	146.54	149	4367145	0.99	65.58	146.82	149	3804	631	437	35791	1861
2022-06-09	IT3216	240522	2485407	2387307	96.05	4411532	65.61	4366586	0.99	65.56	71.75	71	4348670	0.99	65.51	72.02	71	4340	477	361	44946	2208
2022-06-09	IT3217	240522	4685437	4413796	94.2	4411532	65.61	4371290	0.99	65.6	131.08	134	4361218	0.99	65.57	131.37	134	3743	527	384	40242	1835
2022-06-09	IT3219	240522	3164121	2980041	94.18	4411532	65.61	4379219	0.99	65.58	90.12	91	4362807	0.99	65.53	90.44	91	3220	356	291	32313	1481
2022-06-09	IT3221	240522	2422577	2301412	95	4411532	65.61	4355508	0.99	65.47	70.3	71	4334460	0.98	65.43	70.61	71	3823	216	136	56024	1697
2022-06-09	IT3222	240522	4253593	3788525	89.07	4411532	65.61	4286903	0.97	65.58	108.52	108	4274439	0.97	65.56	108.83	108	5196	831	461	124629	2596
2022-06-09	IT3224	240522	2706605	2495392	92.2	4411532	65.61	4345999	0.99	65.4	76.61	79	4321553	0.98	65.35	77.01	79	4565	496	343	65533	2178
2022-06-09	IT3226	240522	2655693	2480831	93.42	4411532	65.61	4379367	0.99	65.55	75.46	76	4361326	0.99	65.51	75.75	76	3699	287	244	32165	1781
2022-06-09	SRR19115670	90522	6840653	6759543	98.81	4411532	65.61	4387472	0.99	65.59	215.55	220	4383407	0.99	65.59	215.75	220	1317	358	229	24060	637
2022-06-09	SRR19115671	90522	6897669	6825211	98.95	4411532	65.61	4385061	0.99	65.62	222.47	226	4381163	0.99	65.62	222.66	226	2039	432	381	26471	1001
2022-06-09	SRR19115672	90522	7549920	7465427	98.88	4411532	65.61	4391564	1	65.61	244.8	249	4386464	0.99	65.6	245.08	249	3444	918	729	19968	1741
2022-06-09	SRR19115673	90522	4239676	4212881	99.37	4411532	65.61	4396847	1	65.6	130.31	129	4395430	1	65.6	130.35	129	1702	484	409	14685	851
2022-06-09	SRR19115674	90522	3965676	3919962	98.85	4411532	65.61	4386667	0.99	65.61	123.53	126	4378269	0.99	65.6	123.76	126	1782	390	354	24865	902
2022-06-09	SRR19115675	90522	4660996	4596725	98.62	4411532	65.61	4383004	0.99	65.6	145.34	148	4376295	0.99	65.59	145.55	148	3587	673	726	28528	1805
2022-06-09	SRR19115676	90522	3892473	3848636	98.87	4411532	65.61	4390218	1	65.62	120.16	119	4387292	0.99	65.62	120.23	119	2087	473	390	21314	997
2022-06-09	SRR19115677	90522	3527660	3495334	99.08	4411532	65.61	4392955	1	65.6	109.24	110	4389185	0.99	65.59	109.34	110	1411	407	220	18577	719
2022-06-09	SRR19115678	90522	3036503	3010598	99.15	4411532	65.61	4401148	1	65.61	93.95	94	4398111	1	65.61	94.02	94	1490	324	215	10384	761
2022-06-09	SRR19115679	90522	7506013	7396081	98.54	4411532	65.61	4389005	0.99	65.6	234.25	239	4386596	0.99	65.59	234.37	239	3511	905	742	22527	1797
2022-06-09	SRR19115680	90522	5223520	5173203	99.04	4411532	65.61	4395991	1	65.61	159.15	159	4393835	1	65.61	159.23	159	2443	962	540	15541	1217
2022-06-09	SRR19115681	90522	4058459	4023979	99.15	4411532	65.61	4389018	0.99	65.61	127	127	4385645	0.99	65.61	127.1	127	1701	345	341	22514	841
2022-06-09	SRR19115682	90522	8692898	8577416	98.67	4411532	65.61	4397807	1	65.61	266.74	262	4396331	1	65.61	266.83	262	2777	832	527	13725	1383
2022-06-09	SRR19115683	90522	10392631	10279241	98.91	4411532	65.61	4392562	1	65.63	324.82	332	4389550	1	65.62	325.05	332	2090	414	376	18970	1004
2022-06-09	SRR19115684	90522	4442710	4382628	98.65	4411532	65.61	4386233	0.99	65.62	134.67	134	4380876	0.99	65.61	134.83	134	2701	436	436	25299	1280
2022-06-09	SRR19115685	90522	5070137	5023297	99.08	4411532	65.61	4379620	0.99	65.62	163.76	165	4375542	0.99	65.61	163.91	165	2061	395	360	31912	1024
2022-06-09	SRR19115686	90522	4743688	4696929	99.01	4411532	65.61	4389796	1	65.62	151.91	151	4387020	0.99	65.62	152	151	1957	468	397	21736	944
2022-06-09	SRR19115687	90522	9078212	8969747	98.81	4411532	65.61	4399317	1	65.61	293.2	299	4396256	1	65.6	293.41	299	3596	1000	746	12215	1841
2022-06-09	SRR19115688	90522	5509189	5453171	98.98	4411532	65.61	4389658	1	65.61	178.14	182	4384581	0.99	65.6	178.34	182	1967	582	309	21874	933
2022-06-09	SRR19115689	90522	4595924	4532426	98.62	4411532	65.61	4387244	0.99	65.62	138.43	138	4383928	0.99	65.62	138.53	138	2036	486	378	24288	1036
2022-06-09	SRR19115690	90522	11073700	10954902	98.93	4411532	65.61	4400058	1	65.62	333.06	338	4398198	1	65.61	333.2	338	2487	799	390	11474	1190
2022-06-09	SRR19115691	90522	4953082	4909225	99.11	4411532	65.61	4372963	0.99	65.61	161.97	163	4366894	0.99	65.6	162.19	163	2491	783	548	38569	1243
2022-06-09	SRR19115692	90522	8791569	8716618	99.15	4411532	65.61	4389115	0.99	65.61	282.95	282	4386858	0.99	65.61	283.1	282	1699	441	339	22417	867
2022-06-09	SRR19115693	90522	6837937	6765379	98.94	4411532	65.61	4409482	1	65.61	219.1	224	4406131	1	65.6	219.26	224	2202	399	387	2050	1057
2022-06-09	SRR19115694	90522	9937592	9850190	99.12	4411532	65.61	4388917	0.99	65.62	322.03	324	4386763	0.99	65.61	322.19	325	1783	339	240	22615	916
2022-06-09	SRR19115695	90522	6021274	5966552	99.09	4411532	65.61	4398546	1	65.61	194.38	197	4394829	1	65.6	194.54	197	1386	337	187	12986	725
2022-06-09	SRR19115696	90522	3401891	3366009	98.95	4411532	65.61	4393160	1	65.61	103.08	103	4390769	1	65.61	103.14	103	1728	468	257	18372	818
2022-06-09	SRR19115697	90522	5281578	5234022	99.1	4411532	65.61	4393336	1	65.6	169.77	169	4389374	0.99	65.59	169.92	169	1239	356	201	18196	623
2022-06-09	SRR19115698	90522	8162603	8058149	98.72	4411532	65.61	4379369	0.99	65.6	263.6	268	4375482	0.99	65.6	263.83	268	2005	528	308	32163	993
2022-06-09	SRR19115699	90522	5552194	5499240	99.05	4411532	65.61	4367916	0.99	65.63	180.47	183	4363316	0.99	65.62	180.66	183	2309	460	405	43616	1108
2022-06-09	SRR19115700	90522	11280467	11070873	98.14	4411532	65.61	4393965	1	65.64	299.74	301	4392630	1	65.64	299.83	301	2592	674	410	17567	1349
2022-06-09	SRR19115701	90522	9875890	9735749	98.58	4411532	65.61	4404973	1	65.61	316.18	321	4401719	1	65.6	316.41	321	2511	676	305	6559	1239
2022-06-09	SRR19115702	90522	11276302	11088914	98.34	4411532	65.61	4400083	1	65.62	352.24	337	4395552	1	65.61	352.6	337	2099	526	451	11449	1035
2022-06-09	SRR19115703	90522	8509776	8403570	98.75	4411532	65.61	4391297	1	65.61	265.91	272	4388175	0.99	65.61	266.09	272	2061	702	313	20235	987
2022-06-09	SRR19115704	90522	6443533	6362433	98.74	4411532	65.61	4401227	1	65.62	203.08	192	4398674	1	65.61	203.2	192	1744	308	241	10305	898
2022-06-09	SRR19115705	90522	4497900	4458483	99.12	4411532	65.61	4397131	1	65.62	144.97	146	4389009	0.99	65.62	145.24	146	2167	365	348	14401	1096
2022-06-09	SRR19115706	90522	6795607	6733627	99.09	4411532	65.61	4368531	0.99	65.61	220.39	221	4365414	0.99	65.61	220.54	221	2082	624	297	43001	1014
2022-06-09	SRR19115707	90522	7200914	7137012	99.11	4411532	65.61	4386672	0.99	65.61	231.09	235	4383258	0.99	65.6	231.27	235	1475	467	259	24860	732
2022-06-09	SRR19115708	90522	5795425	5729868	98.87	4411532	65.61	4392040	1	65.62	187.84	190	4387408	0.99	65.61	188.03	190	2391	469	398	19492	1161
2022-06-09	SRR19115709	90522	5962137	5903349	99.01	4411532	65.61	4396769	1	65.61	189.77	181	4394045	1	65.61	189.89	181	2472	972	567	14763	1211
2022-06-09	SRR19115710	90522	7082727	7023909	99.17	4411532	65.61	4387612	0.99	65.61	226.77	230	4384660	0.99	65.61	226.92	230	1266	352	319	23920	614
2022-06-09	SRR19115711	90522	9443309	9336307	98.87	4411532	65.61	4376474	0.99	65.61	297.46	301	4372737	0.99	65.6	297.71	301	3428	1008	708	35058	1749
2022-06-09	SRR19115712	90522	10047584	9932782	98.86	4411532	65.61	4393245	1	65.61	312.27	319	4389254	0.99	65.6	312.55	319	1921	524	365	18287	967
2022-06-09	SRR19303772	200522	2793032	2757018	98.71	4411532	65.61	4387795	0.99	65.61	84.42	85	4372523	0.99	65.58	84.7	85	2452	424	361	23737	1383
2022-06-09	SRR19303773	200522	3548663	525706	14.81	4411532	65.61	4340054	0.98	65.56	16	16	4269336	0.97	65.52	16.19	16	5712	275	209	71478	2171
2022-06-09	SRR19303774	200522	5344524	2833068	53.01	4411532	65.61	4379547	0.99	65.61	87.75	90	4365374	0.99	65.58	88.01	90	2475	413	368	31985	1055
2022-06-09	SRR19303775	200522	3080708	1263321	41.01	4411532	65.61	4389662	1	65.58	38.46	39	4361008	0.99	65.52	38.68	39	4919	596	376	21870	2522
2022-06-09	SRR19303776	200522	3217035	799325	24.85	4411532	65.61	4369937	0.99	65.56	24.76	25	4317769	0.98	65.49	25	25	3480	341	260	41595	1894
2022-06-09	SRR19303777	200522	6005820	5863647	97.63	4411532	65.61	4386146	0.99	65.62	183.36	188	4376840	0.99	65.59	183.74	188	1828	414	327	25386	927
2022-06-09	SRR19303778	200522	3029202	2976515	98.26	4411532	65.61	4394791	1	65.6	91.25	93	4377690	0.99	65.56	91.58	93	3706	714	620	16741	2040
2022-06-09	SRR19303779	200522	3001715	1154378	38.46	4411532	65.61	4385534	0.99	65.57	34.9	35	4345493	0.99	65.51	35.17	35	3538	273	169	25998	2060
2022-06-09	SRR19303780	200522	3400925	3361005	98.83	4411532	65.61	4384001	0.99	65.59	103.45	106	4369325	0.99	65.56	103.77	106	1800	243	257	27531	1021
2022-06-09	SRR19303781	200522	5956118	5912560	99.27	4411532	65.61	4381596	0.99	65.61	191.3	195	4378484	0.99	65.6	191.43	195	1666	474	442	29936	743
2022-06-09	SRR19303782	200522	2911976	2867480	98.47	4411532	65.61	4380781	0.99	65.61	86.57	88	4363377	0.99	65.57	86.88	88	2259	312	318	30751	1304
2022-06-09	SRR19303783	200522	4022283	3960535	98.46	4411532	65.61	4379421	0.99	65.6	127.58	130	4370009	0.99	65.58	127.84	130	3334	836	663	32111	1730
2022-06-09	SRR19303784	200522	3351742	3126187	93.27	4411532	65.61	4391470	1	65.6	94.75	96	4378805	0.99	65.57	95	96	3020	606	233	20062	1392
2022-06-09	SRR19303785	200522	3244461	3154955	97.24	4411532	65.61	4384518	0.99	65.6	97.55	100	4367979	0.99	65.56	97.89	100	1923	421	384	27014	1085
2022-06-09	SRR19303786	200522	3380587	3346400	98.99	4411532	65.61	4382756	0.99	65.58	103.62	106	4371000	0.99	65.56	103.88	106	1598	255	245	28776	881
2022-06-09	SRR19303787	200522	2972630	2779644	93.51	4411532	65.61	4366969	0.99	65.6	85.63	87	4350412	0.99	65.56	85.93	87	2872	666	367	44563	1534
2022-06-09	SRR19303788	200522	3349481	1349019	40.28	4411532	65.61	4386031	0.99	65.58	41.44	42	4363198	0.99	65.53	41.63	42	4040	296	156	25501	2202
2022-06-09	SRR19303789	200522	3090435	2981869	96.49	4411532	65.61	4388308	0.99	65.6	92.06	94	4373719	0.99	65.57	92.34	94	2234	496	318	23224	1151
2022-06-09	SRR19303790	200522	3926718	3884478	98.92	4411532	65.61	4385494	0.99	65.62	119.65	123	4362113	0.99	65.59	120.27	123	2176	400	360	26038	1171
2022-06-09	SRR19303791	200522	3387041	2524288	74.53	4411532	65.61	4371287	0.99	65.59	78.23	80	4356730	0.99	65.56	78.47	80	4325	612	521	40245	2155
2022-06-09	SRR19303792	200522	3915306	335613	8.57	4411532	65.61	4357338	0.99	65.53	10.21	10	4198416	0.95	65.57	10.47	10	3023	316	267	54194	1406
2022-06-09	SRR19303793	200522	3465100	2946709	85.04	4411532	65.61	4399734	1	65.6	90.64	93	4384852	0.99	65.56	90.93	93	2165	280	233	11798	1106
2022-06-09	SRR19303794	200522	27760790	27264078	98.21	4411532	65.61	4393659	1	65.62	871.53	895	4391594	1	65.62	871.94	896	4420	797	696	17873	2518
2022-06-09	SRR19303795	200522	2276656	2263376	99.42	4411532	65.61	4349837	0.99	65.61	71.33	71	4335599	0.98	65.58	71.55	71	1923	399	270	61695	1091
2022-06-09	SRR19303796	200522	7049938	6383970	90.55	4411532	65.61	4386168	0.99	65.62	197.12	193	4379845	0.99	65.6	197.39	193	2703	549	346	25364	1186
2022-06-09	SRR19303797	200522	3079481	3055280	99.21	4411532	65.61	4382986	0.99	65.6	94.79	92	4372014	0.99	65.57	95.01	92	1835	484	281	28546	1010
2022-06-09	SRR19303798	200522	8234641	8105389	98.43	4411532	65.61	4397221	1	65.61	248.08	247	4393586	1	65.6	248.28	247	2597	421	384	14311	1340
2022-06-09	SRR19303799	200522	7910929	7764397	98.15	4411532	65.61	4392097	1	65.62	238.08	239	4388612	0.99	65.61	238.26	239	2221	280	255	19435	1213
2022-06-09	SRR19303800	200522	7592699	7474482	98.44	4411532	65.61	4397416	1	65.62	226.69	220	4393540	1	65.61	226.88	220	4020	867	748	14116	2130
2022-06-09	SRR19303801	200522	3477626	3448694	99.17	4411532	65.61	4401203	1	65.61	105.94	104	4390782	1	65.59	106.17	104	1866	374	236	10329	1037
2022-06-09	SRR19303802	200522	3475428	3435843	98.86	4411532	65.61	4375490	0.99	65.61	106.15	104	4364005	0.99	65.59	106.4	104	2825	576	468	36042	1559
2022-06-09	SRR19303803	200522	3569326	3529116	98.87	4411532	65.61	4382683	0.99	65.62	108.86	108	4374259	0.99	65.61	109.06	108	2235	474	354	28849	1236
2022-06-09	SRR19303804	200522	4133863	4097199	99.11	4411532	65.61	4407240	1	65.62	125.25	120	4399517	1	65.6	125.46	120	1768	298	166	4292	999
2022-06-09	SRR19303805	200522	3147321	3006178	95.52	4411532	65.61	4393531	1	65.59	96.46	96	4386660	0.99	65.57	96.61	96	1803	352	244	18001	613
2022-06-09	SRR19303806	200522	5672379	2227481	39.27	4411532	65.61	4386797	0.99	65.62	67.77	66	4375708	0.99	65.59	67.92	66	3676	446	308	24735	1815
2022-06-09	SRR19303807	200522	6138774	6073025	98.93	4411532	65.61	4387599	0.99	65.61	184.44	187	4382279	0.99	65.6	184.65	187	1813	427	301	23933	953
2022-06-09	SRR19303808	200522	7453146	7217448	96.84	4411532	65.61	4389367	0.99	65.63	220.06	218	4386230	0.99	65.63	220.21	218	2872	546	398	22165	1347
2022-06-09	SRR19303809	200522	3886985	3768085	96.94	4411532	65.61	4394292	1	65.61	116.92	117	4387492	0.99	65.6	117.09	117	1739	247	208	17240	943
2022-06-09	SRR19303810	200522	9843938	9709230	98.63	4411532	65.61	4401502	1	65.62	311.6	312	4398394	1	65.61	311.82	312	1946	463	224	10030	1064
2022-06-09	SRR19303811	200522	3600383	3542455	98.39	4411532	65.61	4403523	1	65.61	108.33	109	4393235	1	65.59	108.57	109	1733	425	227	8009	947
2022-06-09	SRR19303812	200522	3692594	3618854	98	4411532	65.61	4374389	0.99	65.6	116.3	116	4365637	0.99	65.58	116.53	116	2497	718	518	37143	1314
2022-06-09	SRR19303813	200522	7781066	2163627	27.81	4411532	65.61	4399729	1	65.6	69.2	68	4388213	0.99	65.58	69.37	68	2513	373	201	11803	1123
2022-06-09	SRR19303814	200522	3196407	3145060	98.39	4411532	65.61	4360508	0.99	65.61	100.31	101	4346874	0.99	65.58	100.61	101	1904	422	370	51024	1010
2022-06-09	SRR19303815	200522	4627981	4272520	92.32	4411532	65.61	4391354	1	65.61	137.41	136	4386000	0.99	65.6	137.56	136	2105	232	228	20178	778
2022-06-09	SRR19303816	200522	5206784	5171863	99.33	4411532	65.61	4391525	1	65.63	165.84	157	4390425	1	65.62	165.88	157	1709	312	441	20007	778
2022-06-09	SRR19303817	200522	5106269	4882757	95.62	4411532	65.61	4378532	0.99	65.61	155.8	158	4373373	0.99	65.6	155.98	158	2871	670	456	33000	1304
2022-06-09	SRR19303818	200522	8101576	7779325	96.02	4411532	65.61	4354919	0.99	65.62	250.42	254	4351353	0.99	65.61	250.62	254	2361	477	295	56613	1104
2022-06-09	SRR19303819	200522	7268463	6786628	93.37	4411532	65.61	4378095	0.99	65.61	209.14	213	4373782	0.99	65.59	209.34	213	2490	492	297	33437	1099
2022-06-09	SRR19303820	200522	9663134	855141	8.85	4411532	65.61	4380177	0.99	65.53	25.07	25	4343801	0.98	65.47	25.25	25	12077	592	248	31355	4818
2022-06-09	SRR19303821	200522	3080462	3049537	99	4411532	65.61	4370387	0.99	65.6	93.41	95	4354077	0.99	65.56	93.74	95	2507	561	409	41145	1372
2022-06-09	SRR19303822	200522	2783877	2751237	98.83	4411532	65.61	4394272	1	65.61	83.39	85	4384647	0.99	65.58	83.56	85	1698	454	247	17260	881
2022-06-09	SRR19303823	200522	3175289	3130404	98.59	4411532	65.61	4374691	0.99	65.61	95.81	97	4356366	0.99	65.58	96.18	97	2828	577	435	36841	1638
2022-06-09	SRR19303824	200522	3029467	2994702	98.85	4411532	65.61	4386737	0.99	65.63	87.61	89	4379282	0.99	65.62	87.75	89	2917	456	413	24795	1634
2022-06-09	SRR19303825	200522	3747762	3689905	98.46	4411532	65.61	4378328	0.99	65.6	113.77	115	4366259	0.99	65.58	114.07	116	2171	424	270	33204	1197
2022-06-09	SRR19303826	200522	4407392	4360859	98.94	4411532	65.61	4399295	1	65.61	134.44	137	4389083	0.99	65.58	134.74	137	2642	741	507	12237	1425
2022-06-09	SRR19303827	200522	8318351	8211028	98.71	4411532	65.61	4405923	1	65.61	263.35	264	4401953	1	65.6	263.58	264	2023	271	228	5609	1127
2022-06-09	SRR19303828	200522	3289819	3254122	98.91	4411532	65.61	4385505	0.99	65.62	100.76	103	4370664	0.99	65.58	101.08	103	2071	327	314	26027	1160
2022-06-09	SRR19303829	200522	3152841	3119260	98.93	4411532	65.61	4373539	0.99	65.6	95.99	97	4359105	0.99	65.57	96.29	97	2699	704	500	37993	1499
2022-06-09	SRR19303830	200522	3040860	3006897	98.88	4411532	65.61	4371460	0.99	65.6	92.84	94	4355236	0.99	65.56	93.16	94	2648	459	393	40072	1503
2022-06-09	SRR19303831	200522	3055587	3033464	99.28	4411532	65.61	4389590	1	65.59	93.62	96	4377100	0.99	65.56	93.87	96	1864	406	399	21942	1023
2022-06-09	SRR19303832	200522	2890933	2855410	98.77	4411532	65.61	4390267	1	65.61	87.68	89	4374132	0.99	65.57	87.98	89	2679	748	434	21265	1499
2022-06-09	SRR19303833	200522	3078971	3038161	98.67	4411532	65.61	4347645	0.99	65.58	94.57	97	4332074	0.98	65.55	94.88	97	3595	582	504	63887	1944
2022-06-09	SRR19303834	200522	3638319	3591780	98.72	4411532	65.61	4388629	0.99	65.6	110.96	114	4372941	0.99	65.56	111.33	114	3505	716	553	22903	1864
2022-06-09	SRR19303835	200522	3243425	3210770	98.99	4411532	65.61	4389284	0.99	65.61	98.23	100	4374152	0.99	65.58	98.55	101	2045	291	364	22248	1064
2022-06-09	SRR19303836	200522	2930231	2890531	98.65	4411532	65.61	4383807	0.99	65.58	87.69	89	4369732	0.99	65.54	87.95	89	3401	638	536	27725	1804
2022-06-09	SRR19303837	200522	4472756	4377042	97.86	4411532	65.61	4382574	0.99	65.61	137.74	139	4374005	0.99	65.59	138	139	1945	396	343	28958	996
2022-06-09	SRR19303838	200522	7040308	6952831	98.76	4411532	65.61	4378007	0.99	65.62	213.93	214	4373072	0.99	65.6	214.16	214	2515	691	516	33525	1319
2022-06-09	SRR19303839	200522	6354029	6147118	96.74	4411532	65.61	4383671	0.99	65.62	198.58	202	4375509	0.99	65.6	198.93	202	2306	352	395	27861	1194
2022-06-09	SRR19303840	200522	12089303	11854493	98.06	4411532	65.61	4385900	0.99	65.63	372.71	368	4383873	0.99	65.62	372.88	368	3784	933	704	25632	2092
2022-06-09	SRR19303841	200522	3598979	3541059	98.39	4411532	65.61	4394446	1	65.61	109.44	110	4382313	0.99	65.58	109.73	110	1407	289	144	17086	826
2022-06-09	SRR19303842	200522	3877906	3834659	98.88	4411532	65.61	4353732	0.99	65.6	119.65	122	4339053	0.98	65.57	120.03	122	1772	413	190	57800	1044
2022-06-09	SRR19303843	200522	3482260	3437238	98.71	4411532	65.61	4391177	1	65.6	104.97	105	4378295	0.99	65.57	105.26	105	2796	558	440	20355	1551
2022-06-09	SRR19303844	200522	4584559	4531372	98.84	4411532	65.61	4369795	0.99	65.62	140.75	144	4357825	0.99	65.59	141.12	144	2133	311	373	41737	1110
2022-06-09	SRR19303845	200522	4932160	4877030	98.88	4411532	65.61	4383236	0.99	65.61	150.85	154	4373501	0.99	65.59	151.17	155	2104	516	351	28296	1146
2022-06-09	SRR19303846	200522	3548779	3508985	98.88	4411532	65.61	4390206	1	65.6	107.65	109	4378891	0.99	65.57	107.91	109	1583	527	216	21326	896
2022-06-09	SRR19303847	200522	3426033	3388505	98.9	4411532	65.61	4391581	1	65.61	104.53	106	4376541	0.99	65.57	104.87	106	2057	377	339	19951	1171
2022-06-09	SRR19303848	200522	3609689	3569865	98.9	4411532	65.61	4376059	0.99	65.61	112.68	114	4365256	0.99	65.58	112.95	115	1830	420	369	35473	944
2022-06-09	SRR19303849	200522	3184417	3149331	98.9	4411532	65.61	4380700	0.99	65.59	98.98	100	4365590	0.99	65.55	99.3	100	2290	524	430	30832	1184
2022-06-09	SRR19303850	200522	4015723	3871864	96.42	4411532	65.61	4399421	1	65.6	120.06	121	4390517	1	65.58	120.29	121	1306	262	187	12111	667
2022-06-09	SRR19303851	200522	8887526	8517422	95.84	4411532	65.61	4401515	1	65.62	272.89	278	4397560	1	65.61	273.13	278	2035	365	231	10017	1053
2022-06-09	SRR19303852	200522	3551572	3518069	99.06	4411532	65.61	4374949	0.99	65.6	109.06	109	4366644	0.99	65.59	109.26	109	2281	769	407	36583	1217
2022-06-09	SRR19303853	200522	3286112	3243381	98.7	4411532	65.61	4383953	0.99	65.61	100.26	102	4370373	0.99	65.57	100.55	102	2002	263	317	27579	1110
2022-06-09	SRR19303854	200522	2970425	2919022	98.27	4411532	65.61	4380544	0.99	65.59	90.11	91	4362229	0.99	65.55	90.46	91	1875	284	276	30988	1112
2022-06-09	SRR19303855	200522	4747334	4688355	98.76	4411532	65.61	4385837	0.99	65.6	142.37	145	4376958	0.99	65.58	142.64	145	1808	507	262	25695	1030
2022-06-09	SRR19303856	200522	2913923	2876619	98.72	4411532	65.61	4365153	0.99	65.6	88.81	90	4350428	0.99	65.56	89.09	90	2553	491	390	46379	1414
2022-06-09	SRR19303857	200522	4421906	4384139	99.15	4411532	65.61	4383576	0.99	65.59	135.87	139	4370439	0.99	65.56	136.26	139	1835	368	288	27956	1054
2022-06-09	SRR19303858	200522	3079449	3047891	98.98	4411532	65.61	4383811	0.99	65.61	93.01	94	4368296	0.99	65.57	93.32	94	2236	287	345	27721	1226
2022-06-09	SRR19303859	200522	2905853	2871041	98.8	4411532	65.61	4386224	0.99	65.61	88.64	90	4370710	0.99	65.57	88.93	90	2187	338	346	25308	1200
2022-06-09	SRR19303860	200522	3790725	3751467	98.96	4411532	65.61	4388422	0.99	65.61	115.64	118	4374359	0.99	65.58	115.99	118	2272	510	371	23110	1236
2022-06-09	SRR19303861	200522	2856010	2822704	98.83	4411532	65.61	4379525	0.99	65.59	87.64	89	4362833	0.99	65.55	87.95	89	1643	514	212	32007	961
2022-06-09	SRR19303862	200522	5626083	5394278	95.88	4411532	65.61	4392156	1	65.62	172.8	174	4387477	0.99	65.61	172.97	174	2463	466	449	19376	1223
2022-06-09	SRR19303863	200522	3621946	3569146	98.54	4411532	65.61	4387149	0.99	65.59	111.88	114	4370295	0.99	65.55	112.29	114	3190	903	616	24383	1651
2022-06-09	SRR19303864	200522	2970574	2939304	98.95	4411532	65.61	4392475	1	65.59	91.49	93	4376199	0.99	65.56	91.81	93	1363	294	224	19057	752
2022-06-09	SRR19303865	200522	4474298	3999731	89.39	4411532	65.61	4354521	0.99	65.61	124.25	126	4340883	0.98	65.58	124.61	126	2004	354	281	57011	1117
2022-06-09	SRR19303866	200522	5124653	5081651	99.16	4411532	65.61	4386824	0.99	65.6	158.91	163	4377195	0.99	65.57	159.24	163	1279	276	255	24708	649
2022-06-09	SRR19303867	200522	5377374	5323644	99	4411532	65.61	4390062	1	65.6	161.24	163	4382700	0.99	65.59	161.5	163	2667	685	494	21470	1424
2022-06-09	SRR19303868	200522	4619246	4591307	99.4	4411532	65.61	4392979	1	65.61	150.49	153	4391623	1	65.61	150.53	153	1684	370	399	18553	756
2022-06-09	SRR19303869	200522	3655954	3612431	98.81	4411532	65.61	4390819	1	65.6	109.92	112	4379654	0.99	65.57	110.18	112	1670	252	160	20713	955
2022-06-09	SRR19303870	200522	3009292	2965259	98.54	4411532	65.61	4389090	0.99	65.6	90.28	92	4379741	0.99	65.58	90.46	92	2056	176	218	22442	1170
2022-06-09	SRR19303871	200522	4972808	4901479	98.57	4411532	65.61	4378380	0.99	65.61	151.83	154	4368329	0.99	65.59	152.16	154	3360	782	624	33152	1880
2022-06-09	SRR19303872	200522	3234115	3202339	99.02	4411532	65.61	4345881	0.99	65.62	98.99	94	4336221	0.98	65.6	99.19	94	1901	411	259	65651	1063
2022-06-09	SRR19303873	200522	6214625	6143041	98.85	4411532	65.61	4393311	1	65.63	184.82	181	4388073	0.99	65.63	185.04	181	2262	551	341	18221	1248
2022-06-09	SRR19303874	200522	5100735	5010724	98.24	4411532	65.61	4399695	1	65.61	152.55	151	4392901	1	65.6	152.77	151	2654	886	458	11837	1352
2022-06-09	SRR19303875	200522	7682108	7565529	98.48	4411532	65.61	4362114	0.99	65.6	241.9	247	4356582	0.99	65.58	242.2	247	3780	857	610	49418	1950
2022-06-09	SRR19303876	200522	7648931	6717438	87.82	4411532	65.61	4391794	1	65.61	215.29	219	4386977	0.99	65.6	215.52	219	2340	394	225	19738	960
2022-06-09	SRR19303877	200522	3296239	3257362	98.82	4411532	65.61	4393451	1	65.61	100.12	99	4384137	0.99	65.59	100.32	99	1478	269	211	18081	775
2022-06-09	SRR19303878	200522	2840646	2800808	98.6	4411532	65.61	4392567	1	65.62	88.65	87	4383656	0.99	65.6	88.82	87	2142	451	375	18965	1040
2022-06-09	SRR19303879	200522	3517748	3478019	98.87	4411532	65.61	4401846	1	65.62	107.42	106	4394755	1	65.61	107.58	106	2068	330	235	9686	1166
2022-06-09	SRR19303880	200522	5946897	5877801	98.84	4411532	65.61	4403787	1	65.62	185.37	189	4398896	1	65.61	185.57	189	1763	400	229	7745	861
2022-06-09	SRR19303881	200522	5853677	5783765	98.81	4411532	65.61	4390978	1	65.63	176.28	172	4388805	0.99	65.62	176.37	172	2428	431	380	20554	1225
2022-06-09	SRR19303882	200522	7598280	7485731	98.52	4411532	65.61	4388508	0.99	65.62	227.63	229	4383616	0.99	65.6	227.88	230	2017	475	384	23024	978
2022-06-09	SRR19303883	200522	3485600	3441819	98.74	4411532	65.61	4360540	0.99	65.61	108.74	107	4351646	0.99	65.59	108.95	108	1769	536	268	50992	911
2022-06-09	SRR19303884	200522	3947125	847133	21.46	4411532	65.61	1767955	0.4	42.73	5.01	2	1981	0	54.01	12.32	7	0	0	198	2643577	0
2022-06-09	SRR19303885	200522	3892473	3833787	98.49	4411532	65.61	4389272	0.99	65.61	118.37	118	4382732	0.99	65.6	118.54	118	3757	728	638	22260	1976
2022-06-09	SRR19303886	200522	500766	490746	98	4411532	65.61	4368634	0.99	65.56	14.9	14	4293811	0.97	65.52	15.09	15	3780	585	435	42898	2056
2022-06-09	SRR19303887	200522	5430004	5334827	98.25	4411532	65.61	4353709	0.99	65.61	172.86	177	4348083	0.99	65.6	173.08	177	1887	615	262	57823	948
2022-06-09	SRR19303888	200522	7515263	7413695	98.65	4411532	65.61	4389418	0.99	65.61	237.99	235	4385318	0.99	65.6	238.21	235	1841	401	260	22114	969
2022-06-09	SRR19303889	200522	5873093	5797188	98.71	4411532	65.61	4367028	0.99	65.61	185.38	184	4361667	0.99	65.6	185.6	184	1997	660	295	44504	1002
2022-06-09	SRR19303890	200522	12297118	12119699	98.56	4411532	65.61	4384737	0.99	65.62	372.56	377	4380063	0.99	65.61	372.95	377	1845	645	325	26795	1040
2022-06-09	SRR19303891	200522	4159236	4108595	98.78	4411532	65.61	4385174	0.99	65.61	129.96	130	4378173	0.99	65.59	130.15	130	1582	551	235	26358	843
2022-06-09	SRR19303892	200522	2971591	2915608	98.12	4411532	65.61	4392619	1	65.62	89.92	89	4381179	0.99	65.59	90.14	89	2142	432	417	18913	1099
2022-06-09	SRR19303893	200522	3247389	3184718	98.07	4411532	65.61	4387186	0.99	65.62	97.69	95	4378040	0.99	65.6	97.88	95	2112	502	338	24346	1113
2022-06-09	SRR19303894	200522	5077529	4974662	97.97	4411532	65.61	4397721	1	65.6	153.2	147	4391993	1	65.59	153.39	148	3325	895	651	13811	1708
2022-06-09	SRR19303895	200522	4293974	4232980	98.58	4411532	65.61	4388982	0.99	65.63	127.39	128	4381887	0.99	65.61	127.58	128	2617	429	378	22550	1380
2022-06-09	SRR19303896	200522	3650391	3604889	98.75	4411532	65.61	4385038	0.99	65.63	113.04	115	4378586	0.99	65.61	113.2	115	2573	489	409	26494	1332
2022-06-09	SRR19303897	200522	3778278	3715508	98.34	4411532	65.61	4388974	0.99	65.6	114.68	116	4373367	0.99	65.57	115.07	116	3384	1038	647	22558	1748
2022-06-09	SRR19303898	200522	3353060	3315953	98.89	4411532	65.61	4399016	1	65.61	101.96	103	4391395	1	65.59	102.13	103	1643	263	159	12516	900
2022-06-09	SRR19303899	200522	5823447	5189662	89.12	4411532	65.61	4385887	0.99	65.6	167.36	169	4378655	0.99	65.58	167.62	169	3752	856	535	25645	1590
2022-06-09	SRR19303900	200522	3054296	3007935	98.48	4411532	65.61	4389088	0.99	65.6	89.32	90	4379500	0.99	65.58	89.5	90	4032	710	638	22444	2190
2022-06-09	SRR19303901	200522	3320205	3276309	98.68	4411532	65.61	4384467	0.99	65.6	103.74	105	4373702	0.99	65.58	103.98	105	1616	609	237	27065	838
2022-06-09	SRR19303902	200522	4928684	4900136	99.42	4411532	65.61	4391079	1	65.63	161.32	162	4390527	1	65.63	161.34	162	1714	297	430	20453	782
2022-06-09	SRR19303903	200522	3211830	3100095	96.52	4411532	65.61	4376276	0.99	65.6	102.19	103	4373896	0.99	65.6	102.24	103	2433	726	562	35256	1071
2022-06-09	SRR19303904	200522	2573382	2552791	99.2	4411532	65.61	4382364	0.99	65.61	83.95	85	4380294	0.99	65.6	83.99	85	1539	296	364	29168	682
2022-06-09	SRR19303905	200522	5617900	5576101	99.26	4411532	65.61	4399076	1	65.61	184.2	186	4398268	1	65.61	184.23	186	1125	336	223	12456	505
2022-06-09	SRR19303906	200522	6332799	6275802	99.1	4411532	65.61	4387040	0.99	65.61	202.85	205	4386094	0.99	65.61	202.89	205	1479	544	358	24492	658
2022-06-09	SRR19303907	200522	7708404	5126425	66.5	4411532	65.61	4393760	1	65.61	163.84	165	4393544	1	65.61	163.85	165	2448	208	263	17772	672
2022-06-09	SRR19303908	200522	8953761	8763097	97.87	4411532	65.61	4388853	0.99	65.63	270.89	274	4388277	0.99	65.63	270.93	274	1734	340	439	22679	759
2022-06-09	SRR19303909	200522	6193627	6146367	99.24	4411532	65.61	4401161	1	65.6	197.86	200	4400482	1	65.6	197.89	200	3125	932	853	10371	1547
2022-06-09	SRR19303910	200522	7589565	7535435	99.29	4411532	65.61	4395282	1	65.62	241.58	244	4394902	1	65.62	241.6	244	1734	431	395	16250	763
2022-06-09	SRR19303911	200522	7724435	7610659	98.53	4411532	65.61	4392112	1	65.61	244.81	245	4388141	0.99	65.6	245.02	245	2351	717	362	19420	1180
2022-06-09	SRR19303912	200522	4939877	4908657	99.37	4411532	65.61	4386351	0.99	65.61	159.86	161	4385719	0.99	65.61	159.88	161	1106	287	181	25181	506
2022-06-09	SRR19303913	200522	4000083	3956552	98.91	4411532	65.61	4390477	1	65.61	118.91	117	4389933	1	65.61	118.93	117	1785	420	409	21055	758
2022-06-09	SRR19303914	200522	3911820	3860687	98.69	4411532	65.61	4391743	1	65.6	122.65	120	4390764	1	65.6	122.68	120	1616	289	339	19789	671
2022-06-09	SRR19303915	200522	3627031	3606904	99.45	4411532	65.61	4388619	0.99	65.61	118.21	120	4385765	0.99	65.61	118.28	120	1616	376	358	22913	733
2022-06-09	SRR19303916	200522	6821293	6761804	99.13	4411532	65.61	4394634	1	65.62	205.48	203	4394365	1	65.62	205.49	203	1874	414	480	16898	799
2022-06-09	SRR19303917	200522	3300633	3167191	95.96	4411532	65.61	4378099	0.99	65.61	95.63	92	4376431	0.99	65.61	95.67	92	2907	667	595	33433	1198
2022-06-09	SRR19303918	200522	4242536	4073426	96.01	4411532	65.61	4378855	0.99	65.6	131.19	133	4376237	0.99	65.59	131.26	133	3233	769	718	32677	1503
2022-06-09	SRR19303919	200522	2067927	2049342	99.1	4411532	65.61	4393329	1	65.58	65.65	66	4387167	0.99	65.56	65.74	66	1094	297	197	18203	506
2022-06-09	SRR19303920	200522	5058365	5011369	99.07	4411532	65.61	4395157	1	65.62	163.16	165	4392508	1	65.61	163.26	165	1626	381	376	16375	744
2022-06-09	SRR19303921	200522	3265187	3243014	99.32	4411532	65.61	4380514	0.99	65.58	106.19	108	4375004	0.99	65.56	106.32	108	996	257	182	31018	467
2022-06-09	SRR19303922	200522	4277292	4210080	98.43	4411532	65.61	4385595	0.99	65.62	135.54	137	4378940	0.99	65.6	135.73	137	2117	403	345	25937	1061
2022-06-09	SRR19303923	200522	5411580	5270768	97.4	4411532	65.61	4383269	0.99	65.61	172.58	172	4382145	0.99	65.61	172.63	172	1611	383	341	28263	691
2022-06-09	SRR19303924	200522	5884432	5643673	95.91	4411532	65.61	4393970	1	65.61	183.11	186	4391542	1	65.61	183.21	186	1871	388	354	17562	734
2022-06-09	SRR19303925	200522	3297768	3269718	99.15	4411532	65.61	4378550	0.99	65.61	105.34	106	4376362	0.99	65.61	105.4	106	2174	692	537	32982	1037
2022-06-09	SRR19303926	200522	5236284	5181727	98.96	4411532	65.61	4382658	0.99	65.61	163.35	165	4381545	0.99	65.61	163.39	165	1604	348	382	28874	725
2022-06-09	SRR19303927	200522	5247722	5208158	99.25	4411532	65.61	4392005	1	65.61	165.74	169	4390462	1	65.61	165.79	169	1802	343	366	19527	809
2022-06-09	SRR19303928	200522	8851141	8676645	98.03	4411532	65.61	4405716	1	65.61	229.99	232	4405625	1	65.61	230	232	1359	344	309	5816	605
2022-06-09	SRR19303929	200522	6021781	5986382	99.41	4411532	65.61	4400261	1	65.61	189.63	193	4399580	1	65.61	189.66	193	1032	262	231	11271	471
2022-06-09	SRR19303930	200522	7057599	7033770	99.66	4411532	65.61	4393754	1	65.6	226.14	231	4392820	1	65.6	226.19	231	950	296	195	17778	453
2022-06-09	SRR19303931	200522	5160090	635015	12.31	4411532	65.61	4357552	0.99	65.51	19.85	19	4334296	0.98	65.47	19.93	19	6838	629	316	53980	3258
2022-06-09	SRR19303932	200522	3360682	3313084	98.58	4411532	65.61	4381493	0.99	65.6	101.69	104	4367723	0.99	65.57	101.99	104	2341	349	342	30039	1269
2022-06-09	SRR19303933	200522	12097896	6317796	52.22	4411532	65.61	4386677	0.99	65.62	196.47	190	4384540	0.99	65.61	196.56	190	2223	389	220	24855	1083
2022-06-09	SRR19303934	200522	3504833	3463372	98.82	4411532	65.61	4379763	0.99	65.6	106.87	109	4368124	0.99	65.57	107.14	109	1851	424	329	31769	930
2022-06-09	SRR19303935	200522	3882602	3834166	98.75	4411532	65.61	4392969	1	65.59	119.65	122	4378414	0.99	65.56	120.03	122	1255	368	207	18563	703
2022-06-09	SRR19303936	200522	4214909	4164912	98.81	4411532	65.61	4385857	0.99	65.6	130.55	133	4373452	0.99	65.56	130.91	133	1588	473	334	25675	820
2022-06-09	SRR19303937	200522	3219137	3184353	98.92	4411532	65.61	4388560	0.99	65.58	98.33	100	4373885	0.99	65.55	98.64	100	1723	288	359	22972	889
2022-06-09	SRR19303938	200522	3734835	3653807	97.83	4411532	65.61	4387885	0.99	65.62	115.48	116	4382095	0.99	65.61	115.63	116	2462	519	363	23647	1292
2022-06-09	SRR19303939	200522	3011181	2984471	99.11	4411532	65.61	4390622	1	65.59	93.08	95	4374867	0.99	65.55	93.39	95	1454	286	204	20910	803
2022-06-09	SRR19303940	200522	6104811	6047815	99.07	4411532	65.61	4389261	0.99	65.61	184.12	189	4381333	0.99	65.58	184.44	189	1427	286	249	22271	769
2022-06-09	SRR19303941	200522	3613545	3568076	98.74	4411532	65.61	4384712	0.99	65.6	109.44	111	4369937	0.99	65.56	109.79	111	2086	298	294	26820	1189
2022-06-09	SRR19303942	200522	3493464	3458700	99	4411532	65.61	4373905	0.99	65.61	104.86	105	4360996	0.99	65.58	105.15	106	2759	494	467	37627	1545
2022-06-09	SRR19303943	200522	3025291	2979790	98.5	4411532	65.61	4390901	1	65.61	91.37	93	4373364	0.99	65.57	91.71	93	2352	429	333	20631	1279
2022-06-09	SRR19303944	200522	2911121	2882653	99.02	4411532	65.61	4383842	0.99	65.6	89.04	91	4368607	0.99	65.56	89.33	91	1780	434	341	27690	1052
2022-06-09	SRR19303945	200522	3713200	3674126	98.95	4411532	65.61	4387164	0.99	65.6	113.13	116	4371568	0.99	65.57	113.51	116	1618	363	186	24368	967
2022-06-09	SRR19303946	200522	3007615	2955203	98.26	4411532	65.61	4378523	0.99	65.6	91.18	92	4362800	0.99	65.56	91.49	92	1885	297	331	33009	967
2022-06-09	SRR19303947	200522	2904491	2871026	98.85	4411532	65.61	4388311	0.99	65.61	88.91	91	4371142	0.99	65.57	89.24	91	1581	317	158	23221	963
2022-06-09	SRR19303948	200522	2928252	2898939	99	4411532	65.61	4382182	0.99	65.6	89.69	91	4362929	0.99	65.56	90.05	91	1529	178	190	29350	946
2022-06-09	SRR19303949	200522	6515563	5610539	86.11	4411532	65.61	4384827	0.99	65.61	180.19	184	4379142	0.99	65.6	180.42	184	2321	542	373	26705	1013
2022-06-09	SRR19303950	200522	3380711	3346678	98.99	4411532	65.61	4381695	0.99	65.62	102.81	104	4365673	0.99	65.58	103.16	104	2168	288	349	29837	1237
2022-06-09	SRR19303951	200522	5447178	5380889	98.78	4411532	65.61	4394759	1	65.61	165.43	165	4389714	1	65.59	165.62	165	1427	372	217	16773	741
2022-06-09	SRR19303952	200522	3436187	3391962	98.71	4411532	65.61	4385660	0.99	65.6	104	106	4370277	0.99	65.57	104.35	106	2231	485	285	25872	1210
2022-06-09	SRR19303953	200522	3811968	3779484	99.15	4411532	65.61	4381006	0.99	65.6	116.38	119	4367894	0.99	65.56	116.71	119	1607	368	244	30526	905
2022-06-09	SRR19303954	200522	2946966	2910618	98.77	4411532	65.61	4383284	0.99	65.6	90.09	91	4364134	0.99	65.55	90.45	91	1969	391	293	28248	1125
2022-06-09	SRR19303955	200522	4516728	4457646	98.69	4411532	65.61	4392139	1	65.6	138.42	141	4381796	0.99	65.57	138.73	141	1902	519	372	19393	966
2022-06-09	SRR19303956	200522	2940459	2905027	98.8	4411532	65.61	4383201	0.99	65.61	90.32	92	4365997	0.99	65.57	90.65	92	2100	372	347	28331	1160
2022-06-09	SRR19303957	200522	3098979	3065845	98.93	4411532	65.61	4369106	0.99	65.6	94.75	96	4352664	0.99	65.57	95.08	97	1964	378	336	42426	1171
2022-06-09	SRR19303958	200522	3971018	3939296	99.2	4411532	65.61	4398670	1	65.6	120.91	124	4387374	0.99	65.58	121.2	124	2699	642	457	12862	1478
2022-06-09	SRR19303959	200522	3427409	3398031	99.14	4411532	65.61	4383148	0.99	65.6	104.41	104	4368011	0.99	65.57	104.75	104	1865	382	202	28384	1090
2022-06-09	SRR19303960	200522	9428765	9239348	97.99	4411532	65.61	4383951	0.99	65.62	295.93	304	4380093	0.99	65.61	296.19	304	2308	515	327	27581	1215
2022-06-09	SRR19303961	200522	4313294	4268772	98.97	4411532	65.61	4383993	0.99	65.61	130.18	132	4374147	0.99	65.59	130.46	132	2056	306	288	27539	1139
2022-06-09	SRR19303962	200522	2953102	2913077	98.64	4411532	65.61	4402320	1	65.61	88.88	91	4388256	0.99	65.57	89.14	91	2180	279	290	9212	1178
2022-06-09	SRR19303963	200522	3305097	3265883	98.81	4411532	65.61	4387844	0.99	65.62	98.7	100	4377061	0.99	65.59	98.93	100	2138	403	364	23688	1073
2022-06-09	SRR19303964	200522	3937930	3465901	88.01	4411532	65.61	4380607	0.99	65.57	108.71	111	4364277	0.99	65.53	109.09	111	1398	282	249	30925	637
2022-06-09	SRR19303965	200522	4714446	4664995	98.95	4411532	65.61	4390470	1	65.61	143.71	147	4383886	0.99	65.59	143.92	147	1485	364	221	21062	741
2022-06-09	SRR19303966	200522	3692375	3643511	98.68	4411532	65.61	4382849	0.99	65.61	114.28	116	4372889	0.99	65.59	114.53	116	2728	836	451	28683	1417
2022-06-09	SRR19303967	200522	2490729	2457608	98.67	4411532	65.61	4389350	0.99	65.63	77.33	78	4378105	0.99	65.6	77.52	78	2387	453	348	22182	1286
2022-06-09	SRR19303968	200522	3768324	3723941	98.82	4411532	65.61	4395568	1	65.62	108.9	109	4391119	1	65.61	109	109	2506	518	383	15964	1281
2022-06-09	SRR19303969	200522	2979474	2940499	98.69	4411532	65.61	4384801	0.99	65.61	92.31	94	4373702	0.99	65.59	92.53	94	1978	459	321	26731	1027
2022-06-09	SRR19303970	200522	2868266	2809453	97.95	4411532	65.61	4385655	0.99	65.59	85.97	86	4370854	0.99	65.55	86.24	86	3413	919	560	25877	1814
2022-06-09	SRR19303971	200522	2372630	2336425	98.47	4411532	65.61	4379157	0.99	65.6	72.28	71	4368232	0.99	65.58	72.45	71	1850	700	313	32375	1003
2022-06-09	SRR19303972	200522	4545577	4476200	98.47	4411532	65.61	4377557	0.99	65.62	137.65	138	4368020	0.99	65.59	137.94	138	2000	369	378	33975	1031
2022-06-09	SRR19303973	200522	5097906	5015011	98.37	4411532	65.61	4396825	1	65.61	153.66	148	4391308	1	65.59	153.84	148	1872	531	425	14707	982
2022-06-09	SRR19303974	200522	10984942	10772033	98.06	4411532	65.61	4384066	0.99	65.62	347.91	355	4380663	0.99	65.61	348.18	355	2135	663	347	27466	1170
2022-06-09	SRR19303975	200522	4547307	4487668	98.69	4411532	65.61	4386485	0.99	65.62	142.91	146	4374178	0.99	65.59	143.29	146	1786	427	357	25047	930
2022-06-09	SRR19303976	200522	4517148	4447559	98.46	4411532	65.61	4395021	1	65.61	140.33	132	4391064	1	65.6	140.45	132	2246	603	276	16511	1087
2022-06-09	SRR19303977	200522	4088619	4013453	98.16	4411532	65.61	4399264	1	65.59	123.84	124	4389331	0.99	65.57	124.11	125	3318	791	672	12268	1700
2022-06-09	SRR19303978	200522	3343494	3299779	98.69	4411532	65.61	4364103	0.99	65.62	106.2	108	4349587	0.99	65.58	106.53	108	2125	493	382	47429	1115
2022-06-09	SRR19303979	200522	3775157	3717933	98.48	4411532	65.61	4373100	0.99	65.6	117.7	120	4358732	0.99	65.57	118.06	120	2370	588	494	38432	1272
2022-06-09	SRR19303980	200522	4420761	4360473	98.64	4411532	65.61	4397202	1	65.61	132.44	132	4392148	1	65.6	132.59	132	1791	521	258	14330	892
2022-06-09	SRR19303981	200522	877324	860893	98.13	4411532	65.61	4360080	0.99	65.58	26.03	25	4330038	0.98	65.54	26.17	25	3581	607	285	51452	2069
2022-06-09	SRR19303982	200522	2854563	2810136	98.44	4411532	65.61	4387366	0.99	65.61	85.62	84	4378773	0.99	65.59	85.77	84	1843	529	212	24166	990
2022-06-09	SRR19303983	200522	3289747	3246762	98.69	4411532	65.61	4390802	1	65.62	99.51	100	4383091	0.99	65.6	99.68	100	2432	619	310	20730	1190
2022-06-09	SRR19303984	200522	8138179	8024923	98.61	4411532	65.61	4393937	1	65.61	257.38	260	4389162	0.99	65.6	257.66	260	1820	539	386	17595	953
2022-06-09	SRR19303985	200522	5200228	4323946	83.15	4411532	65.61	4392842	1	65.61	124.67	125	4391335	1	65.61	124.71	125	2234	416	229	18690	876
2022-06-09	SRR19303986	200522	3700138	3646315	98.55	4411532	65.61	4389183	0.99	65.63	111.15	111	4379000	0.99	65.6	111.39	111	2338	328	337	22349	1311
2022-06-09	SRR19303987	200522	4050238	3971768	98.06	4411532	65.61	4382926	0.99	65.62	121.08	121	4373037	0.99	65.59	121.34	121	2011	436	339	28606	1038
2022-06-09	SRR19303988	200522	3837889	3792617	98.82	4411532	65.61	4387639	0.99	65.61	119.81	118	4378666	0.99	65.59	120.04	118	1830	557	386	23893	938
2022-06-09	SRR19303989	200522	3021146	2986783	98.86	4411532	65.61	4394265	1	65.61	92.04	93	4387015	0.99	65.59	92.18	93	1781	205	221	17267	906
2022-06-09	SRR19303990	200522	6910645	6828920	98.82	4411532	65.61	4399775	1	65.61	218.99	222	4392741	1	65.59	219.33	223	1736	402	304	11757	907
2022-06-09	SRR19303991	200522	3129763	3092925	98.82	4411532	65.61	4392545	1	65.61	96.19	98	4385299	0.99	65.59	96.34	98	1790	215	166	18987	902
2022-06-09	SRR19303992	200522	3920635	3882402	99.02	4411532	65.61	4367964	0.99	65.57	124.86	127	4356678	0.99	65.54	125.17	128	1703	571	286	43568	949
2022-06-09	SRR19303993	200522	3421054	3367467	98.43	4411532	65.61	4389390	0.99	65.6	105.78	106	4381748	0.99	65.59	105.96	106	3633	817	652	22142	1912
2022-06-09	SRR19303994	200522	909257	897793	98.74	4411532	65.61	4371471	0.99	65.56	28.04	28	4328581	0.98	65.51	28.27	28	2826	491	275	40061	1667
2022-06-09	SRR19303995	200522	3620440	3579981	98.88	4411532	65.61	4384702	0.99	65.61	112.61	115	4374358	0.99	65.58	112.87	115	1712	343	357	26830	907
2022-06-09	SRR19303996	200522	7684560	7549129	98.24	4411532	65.61	4355958	0.99	65.62	213.96	217	4350211	0.99	65.6	214.23	217	2704	520	253	55574	1655
2022-06-09	SRR19303997	200522	5574582	5488708	98.46	4411532	65.61	4396258	1	65.62	166.11	155	4392855	1	65.61	166.23	155	1709	460	244	15274	881
2022-06-09	SRR19303998	200522	3196134	3149384	98.54	4411532	65.61	4386483	0.99	65.62	95.24	97	4369771	0.99	65.59	95.58	97	2394	294	274	25049	1346
2022-06-09	SRR19303999	200522	4575839	4519028	98.76	4411532	65.61	4375229	0.99	65.61	140.11	139	4368096	0.99	65.59	140.33	139	2488	551	563	36303	1310
2022-06-09	SRR19304000	200522	4841611	4793332	99	4411532	65.61	4382365	0.99	65.61	144.86	145	4375224	0.99	65.59	145.08	145	1648	558	315	29167	889
2022-06-09	SRR19304001	200522	14198741	14030340	98.81	4411532	65.61	4399443	1	65.63	450.59	464	4395078	1	65.61	451.03	464	2179	557	352	12089	1179
2022-06-09	SRR19304002	200522	5459053	5396233	98.85	4411532	65.61	4388615	0.99	65.62	171.69	177	4381339	0.99	65.6	171.96	177	1824	387	347	22917	968
2022-06-09	SRR19304003	200522	3033091	2993365	98.69	4411532	65.61	4382794	0.99	65.62	94.22	93	4373031	0.99	65.6	94.41	93	1970	418	326	28738	1036
2022-06-09	SRR19304004	200522	9667270	9547122	98.76	4411532	65.61	4395433	1	65.61	305.33	308	4390476	1	65.6	305.67	308	2683	788	510	16099	1445
2022-06-09	SRR19304005	200522	3990795	3947115	98.91	4411532	65.61	4381100	0.99	65.61	127.18	130	4369747	0.99	65.58	127.49	130	1711	472	328	30432	962
2022-06-09	SRR19304006	200522	4272869	4226028	98.9	4411532	65.61	4402421	1	65.62	131.24	132	4397123	1	65.61	131.39	133	1781	384	226	9111	901
2022-06-09	SRR19304007	200522	7158665	7069765	98.76	4411532	65.61	4392365	1	65.62	214.79	216	4389288	0.99	65.61	214.93	216	1873	221	194	19167	1046
2022-06-09	SRR19304008	200522	4188690	4122686	98.42	4411532	65.61	4396936	1	65.6	130.14	124	4391307	1	65.59	130.3	124	3294	714	703	14596	1704
2022-06-09	SRR19304009	200522	4271412	4225749	98.93	4411532	65.61	4392439	1	65.61	131.96	134	4386825	0.99	65.6	132.12	134	1741	430	226	19093	878
2022-06-09	SRR19304010	200522	4444634	4404827	99.1	4411532	65.61	4384435	0.99	65.62	136.16	139	4379306	0.99	65.6	136.31	139	1875	421	328	27097	987
2022-06-09	SRR19304011	200522	7913085	7804954	98.63	4411532	65.61	4394911	1	65.63	250.32	245	4390687	1	65.62	250.55	245	2596	552	450	16621	1401
2022-06-09	SRR19304012	200522	6019966	5918440	98.31	4411532	65.61	4395676	1	65.61	181.23	183	4387426	0.99	65.59	181.56	183	2160	506	402	15856	1114
2022-06-09	SRR19304013	200522	4689981	4613820	98.38	4411532	65.61	4389879	1	65.61	147.91	151	4377324	0.99	65.57	148.31	151	1876	544	347	21653	956
2022-06-09	SRR19304014	200522	3002885	2962161	98.64	4411532	65.61	4397327	1	65.61	92.57	92	4385883	0.99	65.59	92.8	92	1524	322	236	14205	810
2022-06-09	SRR19304015	200522	3421353	3367478	98.43	4411532	65.61	4390327	1	65.6	107.44	109	4377345	0.99	65.57	107.73	109	2365	617	450	21205	1214
2022-06-09	SRR19304016	200522	5583213	5507736	98.65	4411532	65.61	4379126	0.99	65.63	176.78	171	4372903	0.99	65.61	177.02	171	2954	810	535	32406	1612
2022-06-09	SRR19304017	200522	3091713	3051862	98.71	4411532	65.61	4386716	0.99	65.6	97.46	97	4376958	0.99	65.58	97.66	97	1461	335	218	24816	740
2022-06-09	SRR19304018	200522	6933086	6848987	98.79	4411532	65.61	4403991	1	65.61	208.5	210	4399372	1	65.6	208.71	210	2475	570	300	7541	1295
2022-06-09	SRR19304019	200522	3890381	3845604	98.85	4411532	65.61	4376128	0.99	65.61	122.74	125	4366025	0.99	65.58	123.01	125	2310	631	498	35404	1192
2022-06-09	SRR19304020	200522	2590556	2547888	98.35	4411532	65.61	4389980	1	65.62	80.36	81	4379489	0.99	65.6	80.54	81	2537	679	322	21552	1359
2022-06-09	SRR19304021	200522	3195866	3140333	98.26	4411532	65.61	4380657	0.99	65.59	97.09	97	4370695	0.99	65.56	97.3	97	2233	416	324	30875	1123
2022-06-09	SRR19304022	200522	4176259	4127328	98.83	4411532	65.61	4385160	0.99	65.61	132.11	133	4377433	0.99	65.59	132.33	133	1398	519	255	26372	736
2022-06-09	SRR19304023	200522	5774703	5689352	98.52	4411532	65.61	4402437	1	65.61	174.9	176	4395719	1	65.6	175.16	176	2554	752	450	9095	1306
2022-06-09	SRR19304024	200522	664237	652469	98.23	4411532	65.61	4379211	0.99	65.59	19.91	19	4331860	0.98	65.54	20.08	19	2848	606	393	32321	1584
2022-06-09	SRR19304025	200522	5421260	5340160	98.5	4411532	65.61	4349146	0.99	65.59	172.93	177	4340874	0.98	65.57	173.24	177	3375	867	566	62386	1755
2022-06-09	SRR19304026	200522	2815181	2785768	98.96	4411532	65.61	4393121	1	65.6	88.18	90	4378700	0.99	65.57	88.45	90	1369	254	184	18411	717
2022-06-09	SRR19304027	200522	2820213	2672378	94.76	4411532	65.61	4386807	0.99	65.62	83.81	85	4375528	0.99	65.59	84.01	86	1820	430	348	24725	947
2022-06-09	SRR19304028	200522	4531656	4480933	98.88	4411532	65.61	4379556	0.99	65.61	143.75	146	4370596	0.99	65.58	144.03	146	1604	473	327	31976	873
2022-06-09	SRR19304029	200522	11109143	10884903	97.98	4411532	65.61	4398327	1	65.62	348.45	337	4396034	1	65.61	348.63	337	2367	379	255	13205	1136
2022-06-09	SRR19304030	200522	4038259	3990058	98.81	4411532	65.61	4376848	0.99	65.62	122.83	118	4366012	0.99	65.59	123.12	118	2912	619	492	34684	1615
2022-06-09	SRR19304031	200522	3294790	3260939	98.97	4411532	65.61	4391646	1	65.61	99.99	102	4378578	0.99	65.58	100.27	102	2103	270	320	19886	1137
2022-06-09	SRR19304032	200522	3768449	3724096	98.82	4411532	65.61	4391911	1	65.62	113.44	115	4381624	0.99	65.6	113.69	116	2292	414	355	19621	1216
2022-06-09	SRR19304033	200522	3612416	3575776	98.99	4411532	65.61	4388441	0.99	65.61	107.84	110	4378159	0.99	65.58	108.08	110	1726	301	175	23091	1039
2022-06-09	SRR19304034	200522	3958134	3923974	99.14	4411532	65.61	4383608	0.99	65.6	122.65	125	4375054	0.99	65.58	122.88	125	1388	422	251	27924	711
2022-06-09	SRR19304035	200522	5881081	5341282	90.82	4411532	65.61	4391768	1	65.62	171.72	175	4385458	0.99	65.61	171.96	175	2713	458	354	19764	1179
2022-06-09	SRR19304036	200522	2921898	659693	22.58	4411532	65.61	770003	0.17	44.95	4.92	2	522	0	22.61	12.02	9	0	0	81	3641529	0
2022-06-09	SRR19304037	200522	2960350	2919824	98.63	4411532	65.61	4400649	1	65.61	89.56	91	4387393	0.99	65.57	89.81	91	2744	616	439	10883	1455
2022-06-09	SRR19304038	200522	3238124	3196937	98.73	4411532	65.61	4371144	0.99	65.6	98.09	99	4360486	0.99	65.57	98.31	99	2116	572	277	40388	1044
2022-06-09	SRR19304039	200522	4763737	4721053	99.1	4411532	65.61	4404753	1	65.61	142.95	145	4401636	1	65.6	143.05	145	1706	332	266	6779	858
2022-06-09	SRR19304040	200522	4008700	3955675	98.68	4411532	65.61	4400680	1	65.61	117.89	107	4395839	1	65.6	118.01	107	2934	840	498	10852	1553
2022-06-09	SRR19304041	200522	4448618	4404268	99	4411532	65.61	4366750	0.99	65.62	137.27	137	4359803	0.99	65.6	137.48	137	1873	511	346	44782	898
2022-06-09	SRR19304042	200522	3644047	3600008	98.79	4411532	65.61	4390802	1	65.63	109.25	106	4382228	0.99	65.61	109.45	106	2407	503	404	20730	1245
2022-06-09	SRR19304043	200522	4380710	4314674	98.49	4411532	65.61	4394085	1	65.61	133.73	129	4387977	0.99	65.59	133.91	129	3525	790	679	17447	1812
2022-06-09	SRR19304044	200522	4113050	4060640	98.73	4411532	65.61	4377077	0.99	65.61	125.11	125	4367589	0.99	65.59	125.37	125	2660	691	465	34455	1359
2022-06-09	SRR19304045	200522	3171291	3136012	98.89	4411532	65.61	4388295	0.99	65.62	92.52	93	4379521	0.99	65.6	92.69	93	2105	376	173	23237	1206
2022-06-09	SRR19304046	200522	5394685	5313606	98.5	4411532	65.61	4379879	0.99	65.63	171.18	174	4374396	0.99	65.61	171.39	174	2314	560	387	31653	1213
2022-06-09	SRR19304047	200522	2970628	2936422	98.85	4411532	65.61	4384880	0.99	65.61	90.48	88	4374542	0.99	65.58	90.68	88	1970	373	337	26652	1107
2022-06-09	SRR19304048	200522	3286688	3248450	98.84	4411532	65.61	4394828	1	65.61	100.55	102	4384353	0.99	65.58	100.78	102	1522	272	225	16704	781
2022-06-09	SRR19304049	200522	3041982	3006294	98.83	4411532	65.61	4381898	0.99	65.62	92.27	92	4372084	0.99	65.6	92.46	92	2345	363	331	29634	1251
2022-06-09	SRR19304050	200522	3669812	3631950	98.97	4411532	65.61	4373334	0.99	65.61	112.26	112	4360547	0.99	65.58	112.57	112	2772	539	426	38198	1566
2022-06-09	SRR19304051	200522	3040281	3003770	98.8	4411532	65.61	4388366	0.99	65.63	91.12	92	4379676	0.99	65.61	91.28	92	2286	286	346	23166	1220
2022-06-09	SRR19304052	200522	3083869	3046734	98.8	4411532	65.61	4389015	0.99	65.63	90.82	92	4380664	0.99	65.61	90.98	92	2458	485	359	22517	1323
2022-06-09	SRR19304053	200522	2953895	2918279	98.79	4411532	65.61	4389142	0.99	65.62	89.49	86	4378179	0.99	65.6	89.69	87	2382	450	376	22390	1265
2022-06-09	SRR19304054	200522	4257206	4213574	98.98	4411532	65.61	4397500	1	65.6	128.91	126	4391525	1	65.59	129.08	126	1919	578	359	14032	1003
2022-06-09	SRR19304055	200522	3010131	2972792	98.76	4411532	65.61	4391406	1	65.62	91.02	90	4378774	0.99	65.59	91.26	90	2371	434	371	20126	1311
2022-06-09	SRR19304056	200522	4315047	4272685	99.02	4411532	65.61	4384278	0.99	65.61	131.52	135	4371096	0.99	65.58	131.89	135	2055	248	296	27254	1154
2022-06-09	SRR19304057	200522	2911537	2553264	87.69	4411532	65.61	4381293	0.99	65.6	82.17	83	4371872	0.99	65.58	82.33	83	2960	484	329	30239	1172
2022-06-09	SRR19304058	200522	9451831	9357629	99	4411532	65.61	4400775	1	65.61	292.19	288	4397850	1	65.6	292.38	289	1920	414	291	10757	987
2022-06-09	SRR19304059	200522	3198111	3164910	98.96	4411532	65.61	4389740	1	65.61	94.62	91	4382069	0.99	65.59	94.77	91	2107	439	392	21792	1109
2022-06-09	SRR19304060	200522	3665382	3628534	98.99	4411532	65.61	4385810	0.99	65.62	108.28	109	4378067	0.99	65.6	108.46	109	1941	266	225	25722	1093
2022-06-09	SRR19304061	200522	5335113	5270621	98.79	4411532	65.61	4384975	0.99	65.61	163.6	166	4375972	0.99	65.59	163.92	166	1989	332	353	26557	1103
2022-06-09	SRR19304062	200522	2822875	2792289	98.92	4411532	65.61	4384585	0.99	65.61	88.32	89	4371924	0.99	65.58	88.55	89	1595	345	267	26947	831
2022-06-09	SRR19304063	200522	4406191	4357916	98.9	4411532	65.61	4392863	1	65.6	137.98	140	4384237	0.99	65.58	138.24	140	2515	666	477	18669	1321
2022-06-09	SRR19304064	200522	5896744	790687	13.41	4411532	65.61	4366675	0.99	65.55	25.43	25	4341088	0.98	65.48	25.55	25	4375	491	431	44857	2079
2022-06-09	SRR19304065	200522	5971729	5903281	98.85	4411532	65.61	4398934	1	65.61	181.99	183	4398602	1	65.6	182	183	3187	823	896	12598	1540
2022-06-09	SRR19304066	200522	2167781	2129698	98.24	4411532	65.61	4400839	1	65.6	68.97	69	4397557	1	65.59	69.02	69	3025	758	741	10693	1479
2022-06-09	SRR19304067	200522	4492116	4159572	92.6	4411532	65.61	4357577	0.99	65.59	137.28	139	4356498	0.99	65.59	137.31	139	3504	1058	737	53955	1629
2022-06-09	SRR19304068	200522	12958269	12875322	99.36	4411532	65.61	4385027	0.99	65.63	426.37	433	4384553	0.99	65.63	426.42	433	1643	404	375	26505	758
2022-06-09	SRR19304069	200522	2652705	2630157	99.15	4411532	65.61	4379577	0.99	65.58	85.64	86	4375928	0.99	65.57	85.71	86	908	194	172	31955	420
2022-06-09	SRR19304070	200522	5728979	5690930	99.34	4411532	65.61	4387050	0.99	65.61	185.51	187	4386364	0.99	65.61	185.54	187	1114	314	222	24482	518
2022-06-09	SRR19304071	200522	6476968	6421914	99.15	4411532	65.61	4370653	0.99	65.63	203.29	205	4368990	0.99	65.63	203.37	205	1756	391	441	40879	785
2022-06-09	SRR19304072	200522	11529504	11391332	98.8	4411532	65.61	4356464	0.99	65.63	366.79	368	4354232	0.99	65.62	366.98	368	2243	604	267	55068	1264
2022-06-09	SRR19304073	200522	4648047	4612711	99.24	4411532	65.61	4394291	1	65.62	148.59	150	4393401	1	65.62	148.62	150	1718	344	468	17241	769
2022-06-09	SRR19304074	200522	5574593	5503981	98.73	4411532	65.61	4392614	1	65.62	180.07	182	4390784	1	65.62	180.14	182	1723	343	385	18918	770
2022-06-09	SRR19304075	200522	3088518	2914087	94.35	4411532	65.61	4390835	1	65.58	95.66	97	4385633	0.99	65.57	95.76	97	1324	194	225	20697	500
2022-06-09	SRR19304076	200522	3906954	3785274	96.89	4411532	65.61	4381872	0.99	65.59	123.91	126	4377464	0.99	65.58	124.03	126	1214	391	212	29660	484
2022-06-09	SRR19304077	200522	2790101	2709053	97.1	4411532	65.61	4358118	0.99	65.61	89.13	90	4352922	0.99	65.6	89.23	90	1046	201	179	53414	499
2022-06-09	SRR19304078	200522	5352605	5315484	99.31	4411532	65.61	4388651	0.99	65.62	172.53	174	4387241	0.99	65.62	172.58	174	1672	389	385	22881	745
2022-06-09	SRR19304079	200522	4309081	4272249	99.15	4411532	65.61	4381625	0.99	65.6	140.62	142	4376026	0.99	65.58	140.79	142	1519	297	312	29907	702
2022-06-09	SRR19304080	200522	2947213	2931632	99.47	4411532	65.61	4390755	1	65.56	97.23	99	4387417	0.99	65.55	97.3	99	1431	332	324	20777	639
2022-06-09	SRR19304081	200522	4033607	4013679	99.51	4411532	65.61	4385528	0.99	65.61	127.07	128	4384584	0.99	65.61	127.1	128	1442	442	377	26004	699
2022-06-09	SRR19304082	200522	5765147	5720396	99.22	4411532	65.61	4401404	1	65.6	184.56	186	4400857	1	65.6	184.58	186	3121	995	825	10128	1548
2022-06-09	SRR19304083	200522	9129943	8989896	98.47	4411532	65.61	4382272	0.99	65.59	288.59	289	4378664	0.99	65.58	288.82	289	2378	592	394	29260	1128
2022-06-09	SRR19304084	200522	4605282	4536342	98.5	4411532	65.61	4379274	0.99	65.63	144.19	145	4378812	0.99	65.63	144.21	145	1678	364	410	32258	765
2022-06-09	SRR19304085	200522	5388594	5288197	98.14	4411532	65.61	4379494	0.99	65.62	167.2	168	4378748	0.99	65.62	167.23	168	2285	953	568	32038	1064
2022-06-09	SRR19304086	200522	5337186	5305212	99.4	4411532	65.61	4385343	0.99	65.62	169.23	171	4384894	0.99	65.62	169.25	171	1744	336	377	26189	799
2022-06-09	SRR19304087	200522	4084753	4048602	99.11	4411532	65.61	4384323	0.99	65.61	132.97	134	4383448	0.99	65.61	133	134	1397	468	328	27209	649
2022-06-09	SRR19304088	200522	4501744	4479918	99.52	4411532	65.61	4390788	1	65.61	145.1	146	4389957	1	65.61	145.13	146	1063	498	191	20744	530
2022-06-09	SRR19304089	200522	3844330	3661345	95.24	4411532	65.61	4386625	0.99	65.6	118.73	119	4385886	0.99	65.6	118.75	119	1494	543	258	24907	540
2022-06-09	SRR19304090	200522	3109190	3067333	98.65	4411532	65.61	4372538	0.99	65.61	97.78	98	4371715	0.99	65.61	97.8	98	2294	656	575	38994	1098
2022-06-09	SRR19304091	200522	3985703	3961222	99.39	4411532	65.61	4393475	1	65.62	126.6	128	4392844	1	65.61	126.62	128	1181	343	274	18057	516
2022-06-09	SRR19304092	200522	4261589	4167419	97.79	4411532	65.61	4379682	0.99	65.61	139.04	140	4377365	0.99	65.6	139.11	140	2313	723	560	31850	1058
2022-06-09	SRR19304093	200522	4684823	4630212	98.83	4411532	65.61	4382071	0.99	65.62	151.71	154	4381429	0.99	65.62	151.73	154	1615	279	360	29461	746
2022-06-09	SRR19304094	200522	3797784	2489309	65.55	4411532	65.61	4354725	0.99	65.59	80.49	79	4343841	0.98	65.56	80.67	80	5428	852	626	56807	2219
2022-06-09	SRR19304095	200522	10245422	9632053	94.01	4411532	65.61	4382517	0.99	65.63	308.55	310	4379446	0.99	65.62	308.76	310	2725	501	369	29015	1268
2022-06-09	SRR19304096	200522	7356539	7219026	98.13	4411532	65.61	4326995	0.98	65.64	223.32	210	4320713	0.98	65.63	223.64	210	4140	1049	725	84537	2191
2022-06-09	SRR19304097	200522	3088541	3041286	98.47	4411532	65.61	4391331	1	65.6	93.99	96	4378148	0.99	65.57	94.25	96	1717	227	183	20201	979
2022-06-09	SRR19304098	200522	4936960	4874908	98.74	4411532	65.61	4394530	1	65.61	157.33	160	4386930	0.99	65.59	157.59	160	1609	293	210	17002	828
2022-06-09	SRR19304099	200522	7017723	6949965	99.03	4411532	65.61	4381810	0.99	65.61	214.53	222	4374623	0.99	65.59	214.86	222	1855	258	188	29722	1107
2022-06-09	SRR19304100	200522	3483510	3446717	98.94	4411532	65.61	4391815	1	65.58	106.07	109	4378341	0.99	65.55	106.38	109	2338	549	260	19717	1272
2022-06-09	SRR19304101	200522	2994423	2845446	95.02	4411532	65.61	4375513	0.99	65.6	87.19	89	4358910	0.99	65.56	87.5	89	2112	403	233	36019	1271
2022-06-09	SRR19304102	200522	6457883	6402249	99.14	4411532	65.61	4390722	1	65.62	194.38	193	4385383	0.99	65.61	194.6	193	1931	302	227	20810	1079
2022-06-09	SRR19304103	200522	7700497	7632640	99.12	4411532	65.61	4384506	0.99	65.61	234.14	241	4379622	0.99	65.6	234.4	241	2357	460	353	27026	1277
2022-06-09	SRR19304104	200522	3109567	2582404	83.05	4411532	65.61	4391461	1	65.59	79.7	81	4373231	0.99	65.55	80.01	81	3076	308	212	20071	1231
2022-06-09	SRR19304105	200522	3514437	3484249	99.14	4411532	65.61	4384899	0.99	65.59	107.89	111	4371885	0.99	65.57	108.19	111	1593	199	175	26633	932
2022-06-09	SRR19304106	200522	3062481	3023896	98.74	4411532	65.61	4376716	0.99	65.59	93.07	95	4360568	0.99	65.55	93.4	95	3469	604	591	34816	1883
2022-06-09	SRR19304107	200522	3216843	3183272	98.96	4411532	65.61	4381320	0.99	65.61	98.89	101	4365216	0.99	65.57	99.23	101	2035	360	371	30212	1074
2022-06-09	SRR19304108	200522	3358420	3316661	98.76	4411532	65.61	4373423	0.99	65.6	103.12	104	4357179	0.99	65.57	103.48	104	2564	600	463	38109	1405
2022-06-09	SRR19304109	200522	2374553	2134819	89.9	4411532	65.61	4386715	0.99	65.6	68.87	70	4373117	0.99	65.56	69.07	70	2342	268	222	24817	923
2022-06-09	SRR19304110	200522	13334001	13178638	98.83	4411532	65.61	4382353	0.99	65.61	422.15	429	4377115	0.99	65.6	422.64	429	1865	483	368	29179	949
2022-06-09	SRR19304111	200522	6930783	6859450	98.97	4411532	65.61	4369661	0.99	65.65	210.43	215	4362811	0.99	65.63	210.74	216	2436	441	369	41871	1396
2022-06-09	SRR19304112	200522	3363553	3329116	98.98	4411532	65.61	4393300	1	65.58	102.73	105	4381115	0.99	65.55	102.99	105	2303	569	257	18232	1219
2022-06-09	SRR19304113	200522	4636455	4590426	99.01	4411532	65.61	4394255	1	65.6	142.8	146	4381734	0.99	65.57	143.19	146	1560	240	224	17277	876
2022-06-09	SRR19304114	200522	5712690	4130682	72.31	4411532	65.61	4394551	1	65.6	125.93	128	4386915	0.99	65.58	126.13	128	4025	759	691	16981	2008
2022-06-09	SRR19304115	200522	8567443	8075088	94.25	4411532	65.61	4389741	1	65.62	243.63	247	4386931	0.99	65.62	243.78	247	2549	435	355	21791	1044
2022-06-09	SRR19304116	200522	4803501	4749931	98.88	4411532	65.61	4376834	0.99	65.61	147.74	152	4365776	0.99	65.59	148.1	152	2862	523	457	34698	1621
2022-06-09	SRR19304117	200522	6393181	6335440	99.1	4411532	65.61	4391931	1	65.59	190.31	195	4387866	0.99	65.58	190.48	195	1739	490	364	19601	890
2022-06-09	SRR19304118	200522	3952845	3915143	99.05	4411532	65.61	4380034	0.99	65.6	120.44	123	4369596	0.99	65.58	120.71	123	1793	513	328	31498	1030
2022-06-09	SRR19304119	200522	4937439	4884364	98.93	4411532	65.61	4381149	0.99	65.62	151.54	155	4371089	0.99	65.59	151.87	155	2406	397	369	30383	1331
2022-06-09	SRR19304120	200522	3373763	3159776	93.66	4411532	65.61	4382642	0.99	65.64	101.05	103	4372884	0.99	65.61	101.26	103	8133	461	244	28890	2268
2022-06-09	SRR19304121	200522	4701013	4656965	99.06	4411532	65.61	4386072	0.99	65.62	143.96	148	4376911	0.99	65.6	144.24	148	2177	372	349	25460	1220
2022-06-09	SRR19304122	200522	3535457	3491623	98.76	4411532	65.61	4385993	0.99	65.61	105.2	108	4374043	0.99	65.58	105.47	108	2544	443	235	25539	1416
2022-06-09	SRR19304123	200522	4219531	4166025	98.73	4411532	65.61	4391045	1	65.61	127	129	4381079	0.99	65.59	127.27	130	2115	406	376	20487	1088
2022-06-09	SRR19304124	200522	4904825	4845931	98.8	4411532	65.61	4382693	0.99	65.6	149.98	154	4374427	0.99	65.58	150.25	154	2177	350	326	28839	1210
2022-06-09	SRR19304125	200522	4883246	4826722	98.84	4411532	65.61	4371446	0.99	65.61	147.66	150	4362882	0.99	65.59	147.94	150	2428	507	495	40086	1261
2022-06-09	SRR19304126	200522	3215291	3165376	98.45	4411532	65.61	4385061	0.99	65.59	97.54	99	4372639	0.99	65.57	97.79	99	1760	290	257	26471	1017
2022-06-09	SRR19304127	200522	4771819	4729133	99.11	4411532	65.61	4357822	0.99	65.6	147.95	151	4348981	0.99	65.58	148.24	151	2055	471	242	53710	1195
2022-06-22	IT2995	220622	1110522	1090589	98.21	4411532	65.61	4366112	0.99	65.36	33.11	33	4324235	0.98	65.28	33.38	33	9790	413	190	45420	5859
2022-06-22	IT2996	220622	1319865	1293739	98.02	4411532	65.61	4333451	0.98	65.23	39.36	40	4284419	0.97	65.14	39.76	40	11205	574	312	78081	6648
2022-06-22	IT2998	220622	2173543	2137144	98.33	4411532	65.61	4340664	0.98	65.36	66.4	67	4311518	0.98	65.29	66.82	68	8598	284	249	70868	5118
2022-06-22	IT3000	220622	963699	781604	81.1	4411532	65.61	4393674	1	65.2	22.46	21	4358413	0.99	65.17	22.59	22	21184	582	195	17858	12356
2022-06-22	IT3001	220622	950852	930525	97.86	4411532	65.61	4354162	0.99	65.47	27.9	27	4319416	0.98	65.41	28.07	28	8680	503	199	57370	5277
2022-06-22	IT3003	220622	1035567	999579	96.52	4411532	65.61	4383958	0.99	65.09	26.56	26	4360294	0.99	65.05	26.67	26	26541	675	194	27574	15766
2022-06-22	IT3004	220622	485199	471239	97.12	4411532	65.61	4369362	0.99	65.32	14	14	4266516	0.97	65.23	14.24	14	13290	632	406	42170	7588
2022-06-22	IT3006	220622	2399726	2303765	96	4411532	65.61	4392518	1	65.37	59.68	41	4381638	0.99	65.37	59.82	41	16424	1075	546	19014	9502
2022-06-22	IT3007	220622	611801	592643	96.87	4411532	65.61	4379743	0.99	65.22	16.57	15	4305783	0.98	65.16	16.78	15	16183	541	207	31789	9483
2022-06-22	IT3008	220622	656897	629195	95.78	4411532	65.61	4325077	0.98	65.04	18.31	18	4244478	0.96	64.94	18.58	18	19509	591	235	86455	11397
2022-06-22	IT3010	220622	633504	620162	97.89	4411532	65.61	4375990	0.99	65.47	18.71	18	4300960	0.97	65.37	18.95	19	5864	245	135	35542	3478
2022-06-22	IT3011	220622	1368247	1336414	97.67	4411532	65.61	4394871	1	65.43	39.46	39	4369199	0.99	65.38	39.65	40	11461	887	344	16661	6777
2022-06-22	IT3012	220622	713469	697095	97.71	4411532	65.61	4369768	0.99	65.47	20.6	17	4268615	0.97	65.5	20.97	18	9063	543	251	41764	5350
2022-06-22	IT3013	220622	242507	233944	96.47	4411532	65.61	4238359	0.96	65.56	6.84	6	3608608	0.82	65.84	7.64	6	5707	566	210	173173	3277
2022-06-22	IT3014	220622	685148	669832	97.76	4411532	65.61	4342076	0.98	65.4	20.17	20	4286339	0.97	65.33	20.36	20	11281	556	228	69456	6698
2022-06-22	IT3015	220622	492175	478169	97.15	4411532	65.61	4370565	0.99	65.43	13.62	13	4262076	0.97	65.38	13.86	13	8506	503	270	40967	5033
2022-06-22	IT3016	220622	622692	584929	93.94	4411532	65.61	4342447	0.98	65.42	12.59	12	4296531	0.97	65.46	12.7	12	33820	2305	986	69085	21532
2022-06-22	IT3017	220622	2391736	2319946	97	4411532	65.61	4382900	0.99	65.55	64.47	65	4375008	0.99	65.53	64.58	65	3663	538	234	28632	2116
2022-06-22	IT3020	220622	3962963	3861169	97.43	4411532	65.61	4399726	1	65.55	102.67	105	4396151	1	65.54	102.75	105	5596	480	312	11806	3323
2022-06-22	IT3022	220622	1542288	1500257	97.27	4411532	65.61	4381692	0.99	65.41	42.54	38	4378557	0.99	65.41	42.57	38	15961	1410	514	29840	9342
2022-06-22	IT3023	220622	1671424	1153832	69.03	4411532	65.61	4391533	1	65.15	33	32	4385158	0.99	65.14	33.05	32	28207	1533	747	19999	16549
2022-06-22	IT3033	220622	3152738	3070600	97.39	4411532	65.61	4398209	1	65.56	88.96	83	4397262	1	65.56	88.98	83	4952	972	482	13323	2763
2022-06-22	IT3034	220622	3328480	2629138	78.99	4411532	65.61	4393932	1	65.12	74.85	74	4384580	0.99	65.24	74.89	74	22812	642	255	17600	13815
2022-06-22	IT3037	220622	1454674	1425141	97.97	4411532	65.61	4382271	0.99	65.15	42.43	42	4377991	0.99	65.14	42.47	42	23893	807	264	29261	14064
2022-06-22	IT3038	220622	644090	625124	97.06	4411532	65.61	4381635	0.99	65.5	18.66	18	4319268	0.98	65.43	18.85	18	7279	580	301	29897	4218
2022-06-22	IT3040	220622	1788864	1748198	97.73	4411532	65.61	4378693	0.99	65.58	52.58	53	4359954	0.99	65.54	52.77	53	4194	614	278	32839	2528
2022-06-22	IT3117	220622	5041195	4191477	83.14	4411532	65.61	4381309	0.99	65.6	127.47	129	4378198	0.99	65.59	127.56	129	2401	426	351	30223	1047
2022-06-22	IT3120	220622	2757744	1553498	56.33	4411532	65.61	4358531	0.99	65.6	47.8	41	4353555	0.99	65.59	47.85	41	8451	1094	494	53001	4089
2022-06-22	IT3121	220622	3639594	2765174	75.97	4411532	65.61	4400900	1	65.6	84.78	85	4396624	1	65.59	84.86	85	2383	577	257	10632	994
2022-06-22	IT3122	220622	2696980	1754924	65.07	4411532	65.61	4382980	0.99	65.6	53.63	50	4377045	0.99	65.59	53.69	50	6260	757	460	28552	2841
2022-06-22	IT3445	220622	1417503	1376454	97.1	4411532	65.61	4377168	0.99	65.57	40.87	40	4368022	0.99	65.55	40.95	40	7528	979	459	34364	3923
2022-06-22	IT3446	220622	3491328	3152772	90.3	4411532	65.61	4379374	0.99	65.6	87.53	88	4377132	0.99	65.6	87.57	88	2767	469	314	32158	1272
2022-06-22	IT3447	220622	1629014	1510821	92.74	4411532	65.61	4353753	0.99	65.51	45.92	45	4345292	0.98	65.49	46	45	7951	1244	435	57779	4347
2022-06-22	IT3448	220622	2769051	2297814	82.98	4411532	65.61	4385542	0.99	65.58	67.93	64	4382031	0.99	65.57	67.98	64	6793	959	395	25990	3378
2022-06-22	IT3449	220622	5370648	4091686	76.19	4411532	65.61	4399188	1	65.6	111.49	108	4397955	1	65.6	111.52	108	4221	954	527	12344	1879
2022-06-22	IT3450	220622	5886762	5330809	90.56	4411532	65.61	4327754	0.98	65.61	159.09	147	4323188	0.98	65.6	159.25	147	3964	1043	601	83778	2042
2022-06-22	IT3451	220622	6823350	4508483	66.07	4411532	65.61	4394819	1	65.59	117.64	113	4388319	0.99	65.57	117.81	113	4857	721	412	16713	2289
2022-06-22	IT3452	220622	3611264	3505469	97.07	4411532	65.61	4350032	0.99	65.54	107.68	110	4326736	0.98	65.47	108.22	110	2637	274	254	61500	1411
2022-06-22	IT3453	220622	1390066	1275469	91.76	4411532	65.61	4391576	1	65.43	33.5	33	4365796	0.99	65.37	33.67	33	16176	890	236	19956	9360
2022-06-22	IT3454	220622	4036635	3721366	92.19	4411532	65.61	4388583	0.99	65.6	110.31	110	4377009	0.99	65.57	110.57	110	2966	282	238	22949	1456
2022-06-22	IT3457	220622	3254350	3104567	95.4	4411532	65.61	4383682	0.99	65.59	93.56	87	4368649	0.99	65.55	93.86	87	3049	352	235	27850	1570
2022-06-22	IT3458	220622	3893584	3137444	80.58	4411532	65.61	4369535	0.99	65.58	89.62	91	4356495	0.99	65.54	89.87	91	3429	605	390	41997	1700
2022-06-22	IT3459	220622	4060434	3238388	79.75	4411532	65.61	4399730	1	65.6	89.3	89	4390270	1	65.57	89.47	89	3802	788	376	11802	1903
2022-06-22	IT3461	220622	2985131	2012447	67.42	4411532	65.61	4350718	0.99	65.57	59.72	55	4344656	0.98	65.56	59.8	55	6724	725	460	60814	3146
2022-06-24	2017FPG001	230622	513506	509531	99.23	4411532	65.61	4388027	0.99	65.56	23.45	23	4304023	0.98	65.46	23.79	23	528	194	77	23505	280
2022-06-24	2017FPG002	230622	2423290	2378139	98.14	4411532	65.61	4376363	0.99	65.6	117.75	119	4355394	0.99	65.54	118.28	119	1529	545	241	35169	800
2022-06-24	2017FPG003	230622	3092887	3075359	99.43	4411532	65.61	4377406	0.99	65.58	149.88	152	4353274	0.99	65.5	150.67	152	858	335	149	34126	450
2022-06-24	2017FPG006	230622	2713949	2705233	99.68	4411532	65.61	4389169	0.99	65.6	133.93	135	4373415	0.99	65.56	134.39	136	572	179	60	22363	307
2022-06-24	2017FPG009	230622	2761324	2746370	99.46	4411532	65.61	4366296	0.99	65.57	141.61	143	4341168	0.98	65.48	142.4	144	931	363	130	45236	483
2022-06-24	2017FPG010	230622	263518	261658	99.29	4411532	65.61	4366654	0.99	65.52	13.11	13	3537937	0.8	65.58	14.59	14	765	107	106	44878	391
2022-06-24	2017FPG011	230622	2622598	2606869	99.4	4411532	65.61	4391290	1	65.59	133	135	4367665	0.99	65.51	133.68	135	994	350	178	20242	508
2022-06-24	2017FPG012	230622	3211167	3180424	99.04	4411532	65.61	4395799	1	65.61	98.06	98	4392534	1	65.61	98.12	98	1529	547	228	15733	820
2022-06-24	2017FPG013	230622	2232985	2222075	99.51	4411532	65.61	4376061	0.99	65.6	114.04	114	4353833	0.99	65.53	114.58	115	1545	509	290	35471	801
2022-06-24	2017FPG014	230622	2167160	2158351	99.59	4411532	65.61	4369731	0.99	65.59	113.39	114	4356254	0.99	65.55	113.71	114	849	425	120	41801	431
2022-06-24	2017FPG015	230622	3406427	3383221	99.32	4411532	65.61	4394892	1	65.61	127.59	128	4392667	1	65.61	127.64	128	1559	707	236	16640	834
2022-06-24	2017FPG016	230622	16141001	15743953	97.54	4411532	65.61	4407314	1	65.61	699.39	714	4400435	1	65.59	700.45	714	640	418	63	4218	333
2022-06-24	2017FPG017	230622	1443864	621428	43.04	4411532	65.61	4376762	0.99	65.61	18.92	17	3934599	0.89	66.27	20.2	18	1392	310	104	34770	679
2022-06-24	2017FPG018	230622	2041508	1980457	97.01	4411532	65.61	4396878	1	65.6	103.06	104	4381786	0.99	65.55	103.39	104	1063	459	213	14654	541
2022-06-24	2017FPG019	230622	2178217	2171364	99.69	4411532	65.61	4392985	1	65.6	112.9	114	4383100	0.99	65.57	113.14	114	613	444	139	18547	333
2022-06-24	2017FPG020	230622	2778924	2757394	99.23	4411532	65.61	4389564	1	65.61	131.04	132	4370805	0.99	65.56	131.57	132	976	401	171	21968	500
2022-06-24	2017FPG021	230622	341456	331966	97.22	4411532	65.61	4368665	0.99	65.56	15.44	15	3616044	0.82	65.7	17.06	16	756	89	130	42867	390
2022-06-24	2017FPG022	230622	980059	964492	98.41	4411532	65.61	4381887	0.99	65.59	36.35	36	4266851	0.97	65.38	37.13	36	927	149	120	29645	491
2022-06-24	2017FPG023	230622	724588	707710	97.67	4411532	65.61	4378088	0.99	65.57	34.73	35	4277145	0.97	65.41	35.38	35	954	271	162	33444	493
2022-06-24	2017FPG024	230622	2475419	2467148	99.67	4411532	65.61	4348532	0.99	65.63	118.2	118	4342994	0.98	65.61	118.34	118	937	396	133	63000	495
2022-06-24	2017FPG028	230622	606694	541654	89.28	4411532	65.61	4373090	0.99	65.6	19.18	17	3728907	0.85	66.03	21.17	19	1204	294	84	38442	643
2022-06-24	2017FPG029	230622	3481283	3461751	99.44	4411532	65.61	4398797	1	65.59	169.83	168	4359800	0.99	65.46	171.22	169	1455	810	171	12735	768
2022-06-24	2017FPG031	230622	2147954	2137529	99.51	4411532	65.61	4397436	1	65.61	105.31	105	4390627	1	65.59	105.45	105	1545	699	328	14096	830
2022-06-24	2017FPG032	230622	489259	483327	98.79	4411532	65.61	4373905	0.99	65.54	24.39	24	4298412	0.97	65.42	24.71	24	985	183	125	37627	496
2022-06-24	2017FPG033	230622	1704427	1688475	99.06	4411532	65.61	4386181	0.99	65.62	86.2	86	4378708	0.99	65.61	86.33	86	1036	463	244	25351	523
2022-06-24	2017FPG034	230622	2079415	2053982	98.78	4411532	65.61	4380775	0.99	65.58	96.91	99	4323971	0.98	65.41	98.03	99	966	379	171	30757	501
2022-06-24	2017FPG035	230622	446272	440243	98.65	4411532	65.61	4364906	0.99	65.54	22.74	23	4105374	0.93	65.39	23.7	23	866	249	123	46626	450
2022-06-24	2017FPG036	230622	341098	336611	98.68	4411532	65.61	4360464	0.99	65.53	16.83	17	3798847	0.86	65.6	18.21	18	783	141	151	51068	398
2022-06-24	2017FPG037	230622	275392	262881	95.46	4411532	65.61	4340614	0.98	65.55	12.3	12	2886231	0.65	65.68	14.85	14	1404	143	180	70918	776
2022-06-24	2017FPG039	230622	425914	422226	99.13	4411532	65.61	4367593	0.99	65.53	21.5	21	4095426	0.93	65.45	22.38	22	501	151	102	43939	261
2022-06-24	2017FPG040	230622	2770954	2756754	99.49	4411532	65.61	4377175	0.99	65.55	140.71	143	4328305	0.98	65.4	142.19	144	849	243	118	34357	433
2022-06-24	2017FPG041	230622	1272174	83523	6.57	4411532	65.61	3299484	0.75	65.95	3.32	2	91046	0.02	71.26	18.78	10	1599	79	52	1112048	244
2022-06-24	2017FPG042	230622	761387	638734	83.89	4411532	65.61	4381111	0.99	65.6	20.08	19	4028433	0.91	65.85	21.12	20	836	187	119	30421	423
2022-06-24	2017FPG043	230622	311898	304146	97.51	4411532	65.61	4358644	0.99	65.51	14.37	14	3469017	0.79	65.77	16.15	15	402	68	63	52888	223
2022-06-24	2017FPG044	230622	2050946	855693	41.72	4411532	65.61	4380535	0.99	65.58	28.89	29	4246289	0.96	65.48	29.55	29	877	217	118	30997	448
2022-06-24	2017FPG045	230622	812680	785163	96.61	4411532	65.61	4390653	1	65.59	27.36	26	4239102	0.96	65.55	28.03	27	917	134	117	20879	476
2022-06-24	2017FPG046	230622	718989	238268	33.14	4411532	65.61	4328637	0.98	65.58	7.9	7	1681826	0.38	67.7	11.94	11	521	47	30	82895	105
2022-06-24	2017FPG047	230622	2568430	1582650	61.62	4411532	65.61	4377123	0.99	65.6	56.01	56	4318493	0.98	65.45	56.66	56	1485	355	201	34409	784
2022-06-24	2017FPG048	230622	579528	570977	98.52	4411532	65.61	4378927	0.99	65.58	23.08	23	4140894	0.94	65.19	23.98	23	911	146	130	32605	471
2022-06-24	2017FPG049	230622	676574	662243	97.88	4411532	65.61	4399132	1	65.6	24.13	23	4185802	0.95	65.59	24.91	23	499	114	49	12400	272
2022-06-24	2017FPG050	230622	1863849	1827596	98.05	4411532	65.61	4396151	1	65.6	68.78	67	4341968	0.98	65.5	69.53	67	917	306	142	15381	468
2022-06-24	2017FPG051	230622	1311974	1279915	97.56	4411532	65.61	4383385	0.99	65.59	46.13	45	4312053	0.98	65.47	46.75	46	855	362	87	28147	466
2022-06-24	2017FPG052	230622	2033917	1490345	73.27	4411532	65.61	4399482	1	65.6	53.67	54	4349034	0.99	65.46	54.18	54	546	226	67	12050	289
2022-06-24	2017FPG053	230622	1099231	1086704	98.86	4411532	65.61	4376241	0.99	65.6	43.42	43	4312558	0.98	65.43	43.94	43	1418	370	234	35291	764
2022-06-24	2017FPG054	230622	1571447	1541733	98.11	4411532	65.61	4390230	1	65.62	46.96	46	4355074	0.99	65.52	47.28	47	953	183	119	21302	492
2022-06-24	2017FPG055	230622	699429	664854	95.06	4411532	65.61	4381768	0.99	65.6	24.71	24	4182980	0.95	65.46	25.46	24	894	138	137	29764	459
2022-06-24	2017FPG056	230622	701428	690377	98.42	4411532	65.61	4370991	0.99	65.58	27.9	27	4219488	0.96	65.29	28.64	27	845	227	120	40541	445
2022-06-24	2017FPG057	230622	748239	733021	97.97	4411532	65.61	4387984	0.99	65.58	26.61	26	4198741	0.95	65.61	27.44	27	2015	460	238	23548	1068
2022-06-24	2017FPG058	230622	825769	803407	97.29	4411532	65.61	4381040	0.99	65.59	27.14	26	4211811	0.95	65.66	27.89	26	505	90	43	30492	276
2022-06-24	2017FPG059	230622	816214	799939	98.01	4411532	65.61	4388625	0.99	65.58	29.45	29	4252412	0.96	65.41	30.13	29	539	41	61	22907	294
2022-06-24	2017FPG060	230622	701141	682449	97.33	4411532	65.61	4379612	0.99	65.58	24.34	24	4168902	0.95	65.49	25.19	24	868	124	81	31920	439
2022-06-24	2018FPG001	230622	651431	632937	97.16	4411532	65.61	4378562	0.99	65.57	22.75	22	4130131	0.94	65.67	23.65	23	805	149	101	32970	426
2022-06-24	2018FPG002	230622	1418690	1384193	97.57	4411532	65.61	4396090	1	65.59	49.66	49	4338082	0.98	65.46	50.21	49	914	162	134	15442	472
2022-06-24	2018FPG004	230622	1100982	1089437	98.95	4411532	65.61	4365999	0.99	65.55	42.71	42	4294886	0.97	65.36	43.3	42	817	370	113	45533	441
2022-06-24	2018FPG005	230622	677696	665869	98.25	4411532	65.61	4384697	0.99	65.56	26.45	26	4220947	0.96	65.23	27.19	26	515	77	65	26835	293
2022-06-24	2018FPG006	230622	1125218	1095736	97.38	4411532	65.61	4356378	0.99	65.6	38.78	38	4267284	0.97	65.46	39.42	39	845	193	112	55154	445
2022-06-24	2018FPG008	230622	433508	428005	98.73	4411532	65.61	4363836	0.99	65.57	21.53	21	4091723	0.93	65.44	22.41	21	1344	314	181	47696	719
2022-06-24	2018FPG009	230622	1259488	561731	44.6	4411532	65.61	4378975	0.99	65.58	15.79	15	3735801	0.85	65.96	17.3	16	747	169	77	32557	365
2022-06-24	2018FPG010	230622	470524	355809	75.62	4411532	65.61	4367159	0.99	65.59	11.5	11	2868801	0.65	66.7	14.15	13	590	46	59	44373	293
2022-06-24	2018FPG011	230622	960637	931397	96.96	4411532	65.61	4379912	0.99	65.59	33.39	33	4285576	0.97	65.49	33.95	33	534	95	68	31620	292
2022-06-24	2018FPG012	230622	723092	692308	95.74	4411532	65.61	4382119	0.99	65.57	30.02	30	4252962	0.96	65.36	30.72	30	515	110	51	29413	270
2022-06-24	2018FPG013	230622	1428887	1371008	95.95	4411532	65.61	4390778	1	65.59	49.25	49	4325245	0.98	65.44	49.87	49	1416	381	161	20754	750
2022-06-24	2018FPG014	230622	958815	943655	98.42	4411532	65.61	4391781	1	65.57	34.69	34	4294930	0.97	65.4	35.31	35	2058	360	227	19751	1111
2022-06-24	2018FPG015	230622	1580722	1523025	96.35	4411532	65.61	4392333	1	65.59	52.71	52	4337751	0.98	65.49	53.27	52	601	163	72	19199	320
2022-06-24	2018FPG016	230622	966991	938385	97.04	4411532	65.61	4374982	0.99	65.6	32.35	31	4278540	0.97	65.6	32.88	32	1399	413	158	36550	751
2022-06-24	2018FPG017	230622	762339	732465	96.08	4411532	65.61	4376694	0.99	65.56	25.08	24	4150968	0.94	65.53	26.05	25	1963	315	186	34838	1076
2022-06-24	2018FPG018	230622	874091	842105	96.34	4411532	65.61	4378350	0.99	65.61	28.41	26	4226369	0.96	65.75	29.1	27	1394	284	128	33182	748
2022-06-24	2018FPG019	230622	618147	603807	97.68	4411532	65.61	4391868	1	65.59	22.61	21	4111841	0.93	65.67	23.59	22	777	165	111	19664	407
2022-06-24	2018FPG020	230622	3886395	3639542	93.65	4411532	65.61	4406835	1	65.6	124.87	122	4363466	0.99	65.51	126.01	123	970	122	129	4697	516
2022-06-24	2018FPG021	230622	1126493	1095696	97.27	4411532	65.61	4388458	0.99	65.61	41.15	37	4314457	0.98	65.53	41.68	38	935	230	114	23074	484
2022-06-24	2018FPG022	230622	1105754	1060166	95.88	4411532	65.61	4383086	0.99	65.61	41.81	40	4314680	0.98	65.47	42.32	40	962	137	178	28446	491
2022-06-24	2018FPG023	230622	1618793	1575474	97.32	4411532	65.61	4380191	0.99	65.6	61.74	61	4343084	0.98	65.51	62.18	61	1482	470	184	31341	807
2022-06-24	2018FPG024	230622	814387	801585	98.43	4411532	65.61	4388108	0.99	65.57	32.01	31	4256100	0.96	65.38	32.75	32	505	227	48	23424	284
2022-06-24	2018FPG025	230622	940538	898887	95.57	4411532	65.61	4379526	0.99	65.59	38.26	38	4291761	0.97	65.43	38.9	38	960	348	195	32006	501
2022-06-24	2018FPG026	230622	1195753	1154224	96.53	4411532	65.61	4391775	1	65.58	47.24	47	4314185	0.98	65.4	47.97	47	1423	472	165	19757	753
2022-06-24	2018FPG027	230622	942286	913489	96.94	4411532	65.61	4385695	0.99	65.57	38.79	38	4300419	0.97	65.39	39.42	39	816	145	123	25837	411
2022-06-24	2018FPG028	230622	839046	819705	97.69	4411532	65.61	4372941	0.99	65.56	35.75	35	4271021	0.97	65.37	36.44	36	799	182	138	38591	415
2022-06-24	2018FPG029	230622	438121	421652	96.24	4411532	65.61	4375869	0.99	65.58	17.56	17	3882770	0.88	65.39	18.88	18	814	87	126	35663	413
2022-06-24	2018FPG030	230622	965585	927756	96.08	4411532	65.61	4388591	0.99	65.57	40	39	4294828	0.97	65.38	40.73	40	2061	372	255	22941	1104
2022-06-24	2018FPG031	230622	1034912	995497	96.19	4411532	65.61	4378467	0.99	65.57	42.77	42	4283948	0.97	65.41	43.57	43	2131	472	292	33065	1142
2022-06-24	2018FPG032	230622	1292824	1233351	95.4	4411532	65.61	4387841	0.99	65.59	51	50	4329611	0.98	65.46	51.58	50	1390	630	198	23691	731
2022-06-24	2018FPG033	230622	419647	411404	98.04	4411532	65.61	4382653	0.99	65.57	19.7	19	3911645	0.89	65.7	21.16	20	814	253	137	28879	410
2022-06-24	2018FPG034	230622	2722657	2712674	99.63	4411532	65.61	4384471	0.99	65.56	135.62	126	4342516	0.98	65.43	136.82	126	569	242	106	27061	291
2022-06-24	2018FPG035	230622	610170	585993	96.04	4411532	65.61	4387587	0.99	65.55	25.01	25	4210531	0.95	65.37	25.75	25	2003	387	223	23945	1087
2022-06-24	2018FPG036	230622	291352	279651	95.98	4411532	65.61	4360409	0.99	65.51	12.08	12	3019483	0.68	65.55	14.44	14	970	225	80	51123	522
2022-06-24	2018FPG037	230622	624116	595089	95.35	4411532	65.61	4368001	0.99	65.57	25.47	25	4207807	0.95	65.4	26.15	25	1363	306	154	43531	738
2022-06-24	2018FPG039	230622	875897	840911	96.01	4411532	65.61	4384760	0.99	65.57	35.26	35	4294108	0.97	65.4	35.86	35	528	197	54	26772	282
2022-06-24	2018FPG040	230622	534016	517244	96.86	4411532	65.61	4388078	0.99	65.54	23.8	24	4248783	0.96	65.45	24.29	24	328	57	40	23454	171
2022-06-24	2018FPG041	230622	1071716	1066997	99.56	4411532	65.61	4384313	0.99	65.58	55.86	56	4354323	0.99	65.48	56.21	56	567	164	115	27219	309
2022-06-24	2018FPG042	230622	592048	563946	95.25	4411532	65.61	4375818	0.99	65.6	23.35	21	4075796	0.92	65.49	24.51	21	1347	411	185	35714	716
2022-06-24	2018FPG043	230622	2895568	2881622	99.52	4411532	65.61	4382157	0.99	65.59	141.63	139	4334161	0.98	65.43	143.08	140	949	342	159	29375	490
2022-06-24	2018FPG044	230622	2760447	2747103	99.52	4411532	65.61	4387469	0.99	65.6	134.32	135	4337854	0.98	65.46	135.73	135	1020	364	149	24063	546
2022-06-24	2018FPG045	230622	2556729	2541016	99.39	4411532	65.61	4384356	0.99	65.55	123.23	120	4330728	0.98	65.38	124.64	120	1412	502	185	27176	740
2022-06-24	2018FPG046	230622	436314	431766	98.96	4411532	65.61	4371455	0.99	65.54	21.71	22	4109013	0.93	65.43	22.6	22	508	140	75	40077	280
2022-06-24	2018FPG047	230622	2506936	419476	16.73	4411532	65.61	4399331	1	65.57	18.82	18	4136805	0.94	65.51	19.54	19	958	94	87	12201	432
2022-06-24	2018FPG048	230622	3908868	3846605	98.41	4411532	65.61	4392586	1	65.59	180.94	184	4370140	0.99	65.52	181.82	184	866	360	161	18946	456
2022-06-24	2018FPG050	230622	2926379	2915945	99.64	4411532	65.61	4372604	0.99	65.56	151.11	154	4323684	0.98	65.4	152.71	155	529	326	65	38928	294
2022-06-24	2018FPG051	230622	2589323	2574209	99.42	4411532	65.61	4370736	0.99	65.54	132.97	136	4314621	0.98	65.38	134.57	137	946	417	171	40796	492
2022-06-24	2018FPG052	230622	1383150	1370016	99.05	4411532	65.61	4368477	0.99	65.57	70.34	71	4280937	0.97	65.36	71.59	72	531	228	120	43055	279
2022-06-24	2018FPG053	230622	666841	648516	97.25	4411532	65.61	4369067	0.99	65.58	30.72	29	4241425	0.96	65.45	31.38	29	1397	368	192	42465	754
2022-06-24	2018FPG054	230622	303637	297167	97.87	4411532	65.61	4371963	0.99	65.56	14.82	14	3461041	0.78	65.51	16.76	16	734	111	100	39569	379
2022-06-24	2019FPG001	230622	2092318	2076269	99.23	4411532	65.61	4361566	0.99	65.54	100.17	101	4300876	0.97	65.37	101.43	101	1461	423	194	49966	775
2022-06-24	2019FPG002	230622	1567740	1546688	98.66	4411532	65.61	4365741	0.99	65.51	70.56	71	4297043	0.97	65.34	71.51	71	2099	402	307	45791	1144
2022-06-24	2019FPG003	230622	3273304	3253250	99.39	4411532	65.61	4375588	0.99	65.57	158.85	163	4329143	0.98	65.42	160.45	163	952	326	177	35944	486
2022-06-24	2019FPG004	230622	2150547	2143165	99.66	4411532	65.61	4386741	0.99	65.59	110.04	111	4368248	0.99	65.53	110.48	111	929	415	157	24791	487
2022-06-24	2019FPG005	230622	3144193	3124564	99.38	4411532	65.61	4382592	0.99	65.55	159.71	162	4333808	0.98	65.39	161.38	163	1473	670	231	28940	782
2022-06-24	2019FPG006	230622	3143502	3117673	99.18	4411532	65.61	4376258	0.99	65.55	160.02	163	4329011	0.98	65.4	161.65	164	2157	478	280	35274	1180
2022-06-24	2019FPG007	230622	2227171	2217367	99.56	4411532	65.61	4361812	0.99	65.58	110.66	110	4321541	0.98	65.45	111.56	110	811	345	96	49720	410
2022-06-24	2019FPG008	230622	1297276	1290643	99.49	4411532	65.61	4376871	0.99	65.56	69.26	71	4283051	0.97	65.36	70.54	71	829	315	131	34661	434
2022-06-24	2019FPG009	230622	1727894	1714438	99.22	4411532	65.61	4391410	1	65.56	90.99	92	4328739	0.98	65.39	92.15	93	981	420	177	20122	501
2022-06-24	2019FPG010	230622	2386792	2379012	99.67	4411532	65.61	4380367	0.99	65.56	116.15	113	4332394	0.98	65.41	117.32	113	551	170	62	31165	301
2022-06-24	2019FPG011	230622	2287323	2278733	99.62	4411532	65.61	4372786	0.99	65.54	111.6	107	4323265	0.98	65.39	112.75	107	882	291	123	38746	466
2022-06-24	2019FPG013	230622	2359766	2351279	99.64	4411532	65.61	4401678	1	65.61	96.77	97	4399284	1	65.6	96.82	97	610	298	76	9854	330
2022-06-24	2019FPG014	230622	2058533	2050994	99.63	4411532	65.61	4395015	1	65.61	99.07	100	4386341	0.99	65.58	99.25	100	625	326	105	16517	348
2022-06-24	2019FPG015	230622	2579848	2568819	99.57	4411532	65.61	4385030	0.99	65.58	131.63	133	4336958	0.98	65.43	132.96	133	984	353	141	26502	503
2022-06-24	2019FPG016	230622	2671684	2659675	99.55	4411532	65.61	4389798	1	65.59	134.62	135	4343822	0.98	65.44	135.9	136	1416	469	179	21734	760
2022-06-24	2019FPG017	230622	3097733	3080779	99.45	4411532	65.61	4383723	0.99	65.6	159.97	163	4341602	0.98	65.46	161.39	163	962	408	143	27809	487
2022-06-24	2019FPG018	230622	2241351	2227459	99.38	4411532	65.61	4392429	1	65.62	101.27	102	4380284	0.99	65.57	101.53	102	1012	355	191	19103	504
2022-06-24	2019FPG019	230622	2567536	2553456	99.45	4411532	65.61	4388491	0.99	65.59	130.9	133	4345351	0.98	65.45	132.07	133	978	411	143	23041	500
2022-06-24	2019FPG020	230622	2844519	2824509	99.3	4411532	65.61	4374746	0.99	65.59	145.94	149	4331665	0.98	65.45	147.27	149	850	370	142	36786	443
2022-06-24	2019FPG021	230622	2601467	2586587	99.43	4411532	65.61	4372779	0.99	65.58	131.75	134	4328049	0.98	65.45	132.98	134	1491	437	226	38753	786
2022-06-24	2019FPG022	230622	2578406	2566956	99.56	4411532	65.61	4387451	0.99	65.57	132.13	134	4346404	0.99	65.44	133.25	135	830	352	183	24081	440
2022-06-24	2019FPG023	230622	3749888	3732253	99.53	4411532	65.61	4379623	0.99	65.55	189.4	195	4330308	0.98	65.39	191.45	195	580	151	85	31909	313
2022-06-24	2019FPG024	230622	2882839	2869229	99.53	4411532	65.61	4396641	1	65.6	145.63	147	4359274	0.99	65.48	146.75	148	557	178	83	14891	310
2022-06-24	2019FPG026	230622	2913600	2900291	99.54	4411532	65.61	4378232	0.99	65.58	149.39	152	4336702	0.98	65.45	150.7	153	839	227	107	33300	442
2022-06-24	2019FPG027	230622	2532486	2522066	99.59	4411532	65.61	4391240	1	65.59	130.69	132	4351790	0.99	65.46	131.73	132	837	293	149	20292	427
2022-06-24	2019FPG028	230622	3400502	3383289	99.49	4411532	65.61	4375982	0.99	65.58	172.12	175	4330059	0.98	65.43	173.83	176	996	372	161	35550	520
2022-06-24	2019FPG029	230622	1223379	1216924	99.47	4411532	65.61	4375629	0.99	65.58	55.21	55	4315405	0.98	65.44	55.91	56	824	217	89	35903	433
2022-06-24	2019FPG031	230622	8649363	8609881	99.54	4411532	65.61	4387722	0.99	65.59	429.91	444	4352786	0.99	65.47	433.25	445	600	126	69	23810	323
2022-06-24	2019FPG032	230622	1944779	1936179	99.56	4411532	65.61	4367566	0.99	65.5	97.36	99	4311804	0.98	65.33	98.52	99	536	128	67	43966	284
2022-06-24	2019FPG033	230622	1228750	1221754	99.43	4411532	65.61	4366248	0.99	65.56	62.75	61	4325162	0.98	65.44	63.29	61	1494	432	238	45284	785
2022-06-24	2019FPG035	230622	1971512	1963703	99.6	4411532	65.61	4392303	1	65.61	97.18	97	4387223	0.99	65.6	97.27	97	1029	463	229	19229	521
2022-06-24	2019FPG036	230622	2211941	2197697	99.36	4411532	65.61	4388743	0.99	65.62	112.76	113	4376699	0.99	65.58	113.05	113	1024	398	224	22789	523
2022-06-24	2019FPG037	230622	1803386	1796082	99.59	4411532	65.61	4393356	1	65.6	94.41	95	4376469	0.99	65.54	94.74	95	600	316	92	18176	310
2022-06-24	2019FPG039	230622	2376278	2365755	99.56	4411532	65.61	4397024	1	65.61	110.58	111	4392487	1	65.6	110.68	111	1557	725	230	14508	840
2022-06-24	2019FPG040	230622	2586119	2523541	97.58	4411532	65.61	4401078	1	65.6	112.53	114	4381702	0.99	65.54	112.99	114	480	63	58	10454	257
2022-06-24	2019FPG041	230622	1889177	1880178	99.52	4411532	65.61	4380211	0.99	65.62	95.08	95	4371676	0.99	65.6	95.24	95	1033	461	157	31321	521
2022-06-24	2019FPG042	230622	1266285	1260485	99.54	4411532	65.61	4370368	0.99	65.55	64.03	64	4327990	0.98	65.42	64.6	64	953	386	158	41164	485
2022-06-24	2019FPG043	230622	491074	488080	99.39	4411532	65.61	4386204	0.99	65.6	20.61	20	4276854	0.97	65.55	20.98	20	567	109	99	25328	328
2022-06-24	2019FPG044	230622	1683232	1666149	98.99	4411532	65.61	4385051	0.99	65.58	78.53	78	4359207	0.99	65.51	78.95	79	2178	611	379	26481	1160
2022-06-24	2019FPG045	230622	2430534	2417712	99.47	4411532	65.61	4372548	0.99	65.62	121.55	123	4352661	0.99	65.56	122.06	123	1090	481	162	38984	544
2022-06-24	2019FPG046	230622	1963904	1948402	99.21	4411532	65.61	4384544	0.99	65.59	99.81	100	4370168	0.99	65.55	100.11	100	2235	845	446	26988	1195
2022-06-24	2019FPG047	230622	1929194	1917048	99.37	4411532	65.61	4376288	0.99	65.6	100.75	101	4356834	0.99	65.54	101.17	101	1563	584	266	35244	830
2022-06-24	2019FPG049	230622	2219818	2211699	99.63	4411532	65.61	4397034	1	65.6	109.67	111	4383078	0.99	65.55	109.98	111	378	232	77	14498	199
2022-06-24	2019FPG051	230622	1681065	1670443	99.37	4411532	65.61	4389197	0.99	65.6	86.75	87	4366097	0.99	65.56	87.17	87	2242	791	417	22335	1206
2022-06-24	2020FPG001	230622	2300221	2287823	99.46	4411532	65.61	4399638	1	65.59	118.43	120	4372810	0.99	65.5	119.09	120	333	51	78	11894	173
2022-06-24	2020FPG002	230622	2627328	2610017	99.34	4411532	65.61	4384361	0.99	65.57	128.67	129	4356363	0.99	65.48	129.46	130	1514	586	231	27171	802
2022-06-24	2020FPG004	230622	1682922	1676618	99.63	4411532	65.61	4372972	0.99	65.55	87.24	88	4337377	0.98	65.44	87.91	88	545	147	83	38560	302
2022-06-24	2020FPG006	230622	1996166	1972568	98.82	4411532	65.61	4387355	0.99	65.62	93.86	93	4369699	0.99	65.57	94.21	93	979	484	190	24177	498
2022-06-24	2020FPG008	230622	1893113	1883861	99.51	4411532	65.61	4383533	0.99	65.58	93.63	90	4364991	0.99	65.52	94	91	592	197	102	27999	312
2022-06-24	2020FPG009	230622	2127820	2117567	99.52	4411532	65.61	4382694	0.99	65.6	107.99	109	4367285	0.99	65.55	108.34	109	883	279	146	28838	448
2022-06-24	2020FPG012	230622	2259519	2243194	99.28	4411532	65.61	4399288	1	65.6	114.5	115	4390633	1	65.58	114.69	115	2257	1003	449	12244	1218
2022-06-24	2020FPG013	230622	2391203	2373180	99.25	4411532	65.61	4383587	0.99	65.62	118.34	119	4372679	0.99	65.59	118.61	119	1000	454	188	27945	514
2022-06-24	2020FPG014	230622	1769651	1762420	99.59	4411532	65.61	4396732	1	65.6	89.49	90	4377605	0.99	65.54	89.85	90	1450	728	245	14800	773
2022-06-24	2020FPG015	230622	1967413	1959283	99.59	4411532	65.61	4364424	0.99	65.59	103.04	104	4340700	0.98	65.52	103.56	104	949	488	123	47108	483
2022-06-24	2020FPG016	230622	1909057	1899713	99.51	4411532	65.61	4406259	1	65.61	96.25	97	4373478	0.99	65.56	96.93	97	600	330	79	5273	311
2022-06-24	2020FPG017	230622	1884751	1877933	99.64	4411532	65.61	4375106	0.99	65.57	97.6	98	4351290	0.99	65.49	98.1	98	930	479	141	36426	485
2022-06-24	2020FPG018	230622	2359887	2344656	99.35	4411532	65.61	4376722	0.99	65.58	113.17	114	4353732	0.99	65.5	113.74	114	852	278	137	34810	447
2022-06-24	2020FPG030	230622	1388062	1380743	99.47	4411532	65.61	4368139	0.99	65.55	69.46	70	4348228	0.99	65.49	69.75	70	960	394	160	43393	488
2022-06-24	2020FPG031	230622	2398216	2387750	99.56	4411532	65.61	4393614	1	65.6	119.95	121	4376753	0.99	65.54	120.38	121	583	129	93	17918	306
2022-06-24	2020FPG032	230622	2436192	2423731	99.49	4411532	65.61	4357600	0.99	65.61	120.53	121	4343087	0.98	65.56	120.91	122	959	333	143	53932	499
2022-06-24	2020FPG033	230622	2023576	2006369	99.15	4411532	65.61	4382928	0.99	65.59	100.36	101	4357368	0.99	65.51	100.91	101	970	427	217	28604	493
2022-06-24	2020FPG034	230622	2033935	2021068	99.37	4411532	65.61	4377401	0.99	65.58	103.21	104	4345571	0.99	65.5	103.93	104	985	469	167	34131	508
2022-06-24	2020FPG039	230622	2406687	2393782	99.46	4411532	65.61	4373477	0.99	65.6	121.77	122	4356384	0.99	65.54	122.22	122	1539	456	270	38055	813
2022-06-24	2020FPG042	230622	2255990	2241641	99.36	4411532	65.61	4400712	1	65.6	113.44	114	4387610	0.99	65.55	113.75	114	2229	974	384	10820	1197
2022-06-24	2020FPG044	230622	1969811	1957997	99.4	4411532	65.61	4365489	0.99	65.61	101.94	103	4344746	0.98	65.54	102.39	103	1033	417	203	46043	520
2022-07-21	IT2865	200722	833334	776510	93.18	4411532	65.61	4381616	0.99	65.04	20.76	19	4349166	0.99	65.02	20.89	20	31580	2056	667	29916	18753
2022-07-21	IT2868	200722	826876	767269	92.79	4411532	65.61	4384809	0.99	65.39	20.49	20	4365527	0.99	65.38	20.56	20	16460	1927	527	26723	9957
2022-07-21	IT2878	200722	2547121	2440637	95.82	4411532	65.61	4387197	0.99	65.28	68.94	68	4384211	0.99	65.28	68.98	68	17257	594	338	24335	9834
2022-07-21	IT2880	200722	2118550	1149181	54.24	4411532	65.61	4386323	0.99	64.66	35.43	35	4354467	0.99	64.95	35.52	35	46717	893	437	25209	28263
2022-07-21	IT2882	200722	1412577	1367523	96.81	4411532	65.61	4393291	1	65.03	36.27	33	4386873	0.99	65.02	36.31	33	33006	1422	474	18241	19472
2022-07-21	IT2894	200722	5022195	957262	19.06	4411532	65.61	4388787	0.99	64.62	26.24	25	4375990	0.99	64.61	26.31	25	71587	3131	1381	22745	40265
2022-07-21	IT2899	200722	1011416	974479	96.35	4411532	65.61	4384857	0.99	65.2	26.59	22	4363470	0.99	65.19	26.71	23	23316	1596	448	26675	13915
2022-07-21	IT2900	200722	2046724	1971765	96.34	4411532	65.61	4397778	1	65.52	52.6	51	4395308	1	65.52	52.63	51	7717	717	343	13754	4419
2022-07-21	IT2903	200722	2637512	2567689	97.35	4411532	65.61	4395372	1	65.1	71.67	73	4377111	0.99	65.27	71.79	73	25032	698	456	16160	14633
2022-07-21	IT2930	200722	2131546	2089236	98.02	4411532	65.61	4387174	0.99	65.46	63.69	63	4379260	0.99	65.44	63.79	63	8357	520	354	24358	4880
2022-07-21	IT2933	200722	964902	928445	96.22	4411532	65.61	4392343	1	65.28	24.86	24	4376323	0.99	65.27	24.94	24	22942	2546	848	19189	13986
2022-07-21	IT2936	200722	2291966	2226584	97.15	4411532	65.61	4388815	0.99	65.59	64.75	65	4383436	0.99	65.58	64.82	65	2810	562	322	22717	1581
2022-07-21	IT3029	200722	765166	739128	96.6	4411532	65.61	4392013	1	65.5	22.93	22	4365248	0.99	65.48	23.04	23	7804	629	333	19519	4385
2022-07-21	IT3030	200722	1020354	982898	96.33	4411532	65.61	4386279	0.99	65.17	29.38	25	4367639	0.99	65.16	29.49	26	26489	1074	314	25253	15327
2022-07-21	IT3036	200722	1703386	1650235	96.88	4411532	65.61	4394138	1	65.34	50.3	49	4388983	0.99	65.33	50.36	49	14561	480	212	17394	8586
2022-07-21	IT3057	200722	3624828	3003142	82.85	4411532	65.61	4392984	1	65.62	92.12	88	4388403	0.99	65.62	92.2	88	2641	513	322	18548	1193
2022-07-21	IT3133	200722	5641178	5535037	98.12	4411532	65.61	4296821	0.97	65.62	170.9	152	4285983	0.97	65.6	171.32	152	3694	911	477	114711	2012
2022-07-21	IT3172	200722	2827261	2684260	94.94	4411532	65.61	4386439	0.99	65.61	83.2	85	4373112	0.99	65.58	83.44	85	2223	426	317	25093	1101
2022-07-21	IT3185	200722	2419821	2282411	94.32	4411532	65.61	4390509	1	65.59	70.48	71	4377228	0.99	65.56	70.67	72	2406	652	333	21023	1164
2022-07-21	IT3191	200722	3249570	3135272	96.48	4411532	65.61	4385479	0.99	65.61	98.35	96	4376640	0.99	65.59	98.53	97	2674	315	292	26053	1256
2022-07-21	IT3192	200722	4571225	4231340	92.56	4411532	65.61	4395957	1	65.61	132.4	121	4386405	0.99	65.58	132.67	121	2708	375	356	15575	1182
2022-07-21	IT3195	200722	3258684	3112502	95.51	4411532	65.61	4374180	0.99	65.6	97.27	97	4360572	0.99	65.57	97.55	97	2748	465	430	37352	1473
2022-07-21	IT3196	200722	3221857	3099043	96.19	4411532	65.61	4382826	0.99	65.61	97.65	97	4368911	0.99	65.58	97.94	97	2870	394	365	28706	1277
2022-07-21	IT3197	200722	2536059	2478474	97.73	4411532	65.61	4388562	0.99	65.59	78.94	80	4369058	0.99	65.54	79.26	80	1986	195	217	22970	930
2022-07-21	IT3198	200722	2799780	2697362	96.34	4411532	65.61	4392784	1	65.58	84.88	77	4377635	0.99	65.55	85.14	78	4613	656	521	18748	2169
2022-07-21	IT3228	200722	3449749	870119	25.22	4411532	65.61	4390198	1	65.54	25.89	25	4367990	0.99	65.52	25.99	25	11617	1314	403	21334	5677
2022-07-21	IT3229	200722	5871833	5166237	87.98	4411532	65.61	4391172	1	65.62	148.34	149	4387092	0.99	65.61	148.47	149	3487	411	375	20360	1620
2022-07-21	IT3230	200722	2976272	2863515	96.21	4411532	65.61	4373736	0.99	65.6	90.01	91	4359962	0.99	65.57	90.27	91	2517	450	322	37796	1225
2022-07-21	IT3232	200722	5016898	4511661	89.93	4411532	65.61	4391831	1	65.62	128.12	128	4388076	0.99	65.61	128.23	128	3870	437	372	19701	1716
2022-07-21	IT3233	200722	3936127	3600163	91.46	4411532	65.61	4376180	0.99	65.6	109.23	111	4366169	0.99	65.58	109.47	111	2935	586	431	35352	1421
2022-07-21	IT3234	200722	3048952	2902512	95.2	4411532	65.61	4356914	0.99	65.59	89.9	86	4343857	0.98	65.56	90.15	86	2720	454	239	54618	1309
2022-07-21	IT3235	200722	3456170	3305323	95.64	4411532	65.61	4388318	0.99	65.6	104.09	104	4374508	0.99	65.56	104.4	104	2355	253	238	23214	1066
2022-07-21	IT3236	200722	4091282	3870880	94.61	4411532	65.61	4366608	0.99	65.6	116.58	117	4356840	0.99	65.59	116.83	117	3130	510	254	44924	1451
2022-07-21	IT3239	200722	3731021	3604589	96.61	4411532	65.61	4391157	1	65.6	109.91	111	4381587	0.99	65.58	110.14	111	3395	655	417	20375	1594
2022-07-21	IT3241	200722	2083904	2004919	96.21	4411532	65.61	4385999	0.99	65.56	63.12	62	4365177	0.99	65.52	63.39	62	3344	418	194	25533	1548
2022-07-21	IT3242	200722	2835105	2681347	94.58	4411532	65.61	4392398	1	65.59	83.61	81	4370992	0.99	65.55	83.99	81	4753	778	501	19134	2274
2022-07-21	IT3243	200722	4949022	4623242	93.42	4411532	65.61	4394113	1	65.61	141.77	143	4387977	0.99	65.6	141.95	143	2637	291	302	17419	1214
2022-07-21	IT3244	200722	4133467	3958578	95.77	4411532	65.61	4389134	0.99	65.59	124.45	124	4378263	0.99	65.56	124.74	124	2511	250	213	22398	1051
2022-07-21	IT3245	200722	4643347	4407726	94.93	4411532	65.61	4378207	0.99	65.61	133.65	136	4370233	0.99	65.59	133.88	136	3253	610	477	33325	1627
2022-07-21	IT3246	200722	5239658	4917912	93.86	4411532	65.61	4383295	0.99	65.6	146.51	148	4377622	0.99	65.59	146.69	148	3203	433	387	28237	1504
2022-07-21	IT3248	200722	4986257	4641041	93.08	4411532	65.61	4396025	1	65.6	135.19	136	4391476	1	65.59	135.33	137	2799	567	201	15507	1263
2022-07-21	IT3249	200722	3811829	3630386	95.24	4411532	65.61	4388150	0.99	65.61	107.9	108	4380273	0.99	65.59	108.08	108	3699	506	361	23382	1624
2022-07-21	IT3251	200722	1485442	1424128	95.87	4411532	65.61	4389546	1	65.54	42.52	42	4370069	0.99	65.5	42.68	42	6675	590	391	21986	3462
2022-07-21	IT3252	200722	3116822	2997839	96.18	4411532	65.61	4389949	1	65.59	90.28	91	4378314	0.99	65.56	90.51	92	2522	343	205	21583	1149
2022-07-21	IT3253	200722	4247002	3812546	89.77	4411532	65.61	4394287	1	65.6	110.44	111	4383146	0.99	65.58	110.71	111	4441	707	567	17245	2143
2022-07-21	IT3254	200722	3010489	2481246	82.42	4411532	65.61	4333654	0.98	65.62	76.94	78	4316298	0.98	65.59	77.23	78	4506	786	540	77878	2172
2022-07-21	IT3255	200722	3763412	3481197	92.5	4411532	65.61	4383331	0.99	65.6	97.96	98	4376939	0.99	65.58	98.1	98	2910	605	339	28201	1284
2022-07-21	IT3256	200722	2543268	2473865	97.27	4411532	65.61	4386809	0.99	65.58	77.77	77	4368151	0.99	65.54	78.07	78	2117	401	148	24723	1027
2022-07-21	IT3257	200722	3410121	3214279	94.26	4411532	65.61	4382286	0.99	65.61	94.83	92	4373653	0.99	65.59	95	92	3454	433	386	29246	1555
2022-07-21	IT3262	200722	1288888	1270407	98.57	4411532	65.61	4367609	0.99	65.55	40	40	4341032	0.98	65.49	40.21	40	5558	571	436	43923	3098
2022-07-21	IT3263	200722	834179	821517	98.48	4411532	65.61	4377393	0.99	65.5	25.78	25	4332965	0.98	65.44	25.99	25	6727	394	252	34139	3784
2022-07-21	IT3264	200722	2039587	2013524	98.72	4411532	65.61	4356285	0.99	65.56	64.67	64	4334519	0.98	65.51	64.96	65	2950	471	241	55247	1575
2022-07-21	IT3265	200722	1427851	1404439	98.36	4411532	65.61	4363346	0.99	65.48	44.34	44	4341326	0.98	65.44	44.53	44	6855	489	266	48186	3807
2022-07-21	IT3266	200722	2936468	2892818	98.51	4411532	65.61	4358073	0.99	65.58	89.87	87	4347885	0.99	65.56	90.06	87	3279	435	276	53459	1760
2022-07-21	IT3267	200722	2535397	2499340	98.58	4411532	65.61	4386461	0.99	65.57	78.36	76	4374573	0.99	65.54	78.55	76	2794	283	250	25071	1465
2022-07-21	IT3268	200722	923874	908563	98.34	4411532	65.61	4371707	0.99	65.45	28.68	28	4337985	0.98	65.4	28.86	28	8769	561	263	39825	5134
2022-07-21	IT3269	200722	2873296	2831670	98.55	4411532	65.61	4294193	0.97	65.6	90.63	91	4272153	0.97	65.56	91.07	91	4473	972	444	117339	2350
2022-07-21	IT3271	200722	1654502	1628727	98.44	4411532	65.61	4377820	0.99	65.56	52.04	53	4346517	0.99	65.49	52.37	53	3045	392	292	33712	1581
2022-07-21	IT3273	200722	1422376	1402779	98.62	4411532	65.61	4389940	1	65.51	44.13	44	4364291	0.99	65.45	44.35	44	5899	270	167	21592	3394
2022-07-21	IT3274	200722	1502431	1480114	98.51	4411532	65.61	4378892	0.99	65.53	46.27	46	4352647	0.99	65.48	46.51	46	4673	345	305	32640	2593
2022-07-21	IT3345	200722	1800553	1776982	98.69	4411532	65.61	4355172	0.99	65.55	56.92	55	4335941	0.98	65.52	57.13	55	3788	390	256	56360	2093
2022-07-21	IT3346	200722	2533848	2494003	98.43	4411532	65.61	4333379	0.98	65.57	78.53	80	4312509	0.98	65.53	78.89	80	5337	664	551	78153	2994
2022-07-21	IT3347	200722	1023124	1001209	97.86	4411532	65.61	4389443	0.99	65.22	30.42	29	4367584	0.99	65.19	30.54	29	22682	984	443	22089	13111
2022-07-21	IT3348	200722	3638646	3563967	97.95	4411532	65.61	4408997	1	65.12	101.98	103	4400939	1	65.21	102.05	103	23298	360	159	2535	14311
2022-07-21	IT3350	200722	2242281	2204354	98.31	4411532	65.61	4380404	0.99	65.6	70.17	70	4364909	0.99	65.57	70.39	70	2514	361	310	31128	1261
2022-07-21	IT3351	200722	1503587	1364870	90.77	4411532	65.61	4395900	1	64.92	41.73	35	4384758	0.99	64.91	41.82	35	36151	1050	445	15632	21155
2022-07-21	IT3352	200722	2520096	2445714	97.05	4411532	65.61	4397687	1	65.57	66.53	65	4392401	1	65.56	66.61	65	4696	537	323	13845	2499
2022-07-21	IT3355	200722	2428631	2395904	98.65	4411532	65.61	4393855	1	65.6	75.95	75	4380233	0.99	65.57	76.16	75	1929	388	182	17677	1014
2022-07-21	IT3357	200722	1413495	1361231	96.3	4411532	65.61	4390758	1	65.53	42.97	43	4369290	0.99	65.49	43.15	43	6064	408	329	20774	3362
2022-07-21	IT3358	200722	3179712	2955666	92.95	4411532	65.61	4390382	1	65.58	91.77	93	4383786	0.99	65.56	91.9	93	2779	324	150	21150	1277
2022-07-21	IT3359	200722	1578691	1550481	98.21	4411532	65.61	4366674	0.99	65.56	48.05	47	4345477	0.99	65.53	48.26	47	5136	723	269	44858	2722
2022-07-21	IT3362	200722	6206912	6042895	97.36	4411532	65.61	4396031	1	65.61	161.62	164	4395250	1	65.61	161.64	164	3010	398	374	15501	1541
2022-07-21	IT3363	200722	3385142	3335395	98.53	4411532	65.61	4360902	0.99	65.6	106.15	104	4352516	0.99	65.58	106.33	104	1833	582	264	50630	956
2022-07-21	IT3364	200722	3119060	1741578	55.84	4411532	65.61	4398161	1	65.42	53.51	52	4389767	1	65.4	53.6	52	12669	558	425	13371	6559
2022-07-21	IT3365	200722	3046636	2995796	98.33	4411532	65.61	4377308	0.99	65.6	93.67	92	4369096	0.99	65.58	93.83	92	3033	567	441	34224	1594
2022-07-21	IT3366	200722	2819594	2766139	98.1	4411532	65.61	4390692	1	65.57	87.15	86	4378580	0.99	65.54	87.36	86	4994	733	562	20840	2589
2022-07-21	IT3367	200722	3329329	3280772	98.54	4411532	65.61	4396103	1	65.59	102.88	105	4385248	0.99	65.56	103.11	105	2081	408	251	15429	1012
2022-07-21	IT3368	200722	2074663	2042663	98.46	4411532	65.61	4395503	1	65.47	64.03	54	4384683	0.99	65.45	64.17	54	8091	457	216	16029	4613
2022-07-21	IT3369	200722	5126873	5055418	98.61	4411532	65.61	4401409	1	65.6	156.88	158	4394402	1	65.58	157.11	158	1974	395	250	10123	997
2022-07-21	IT3370	200722	3716239	3654505	98.34	4411532	65.61	4379694	0.99	65.61	115.08	108	4372268	0.99	65.59	115.26	108	2220	511	420	31838	1163
2022-07-21	IT3371	200722	5759521	3790117	65.81	4411532	65.61	4379689	0.99	65.48	101.29	101	4377433	0.99	65.47	101.34	101	11975	676	570	31843	5391
2022-07-21	IT3372	200722	4229167	4178668	98.81	4411532	65.61	4385642	0.99	65.59	132.08	133	4378978	0.99	65.57	132.26	133	2454	490	384	25890	1261
2022-07-21	IT3373	200722	1329679	1269798	95.5	4411532	65.61	4377556	0.99	64.15	28.35	27	4371643	0.99	64.14	28.38	27	77160	3509	867	33976	45250
2022-07-21	IT3374	200722	1645509	1620013	98.45	4411532	65.61	4386127	0.99	65.55	50.65	50	4370696	0.99	65.51	50.8	50	4228	366	262	25405	2357
2022-07-21	IT3376	200722	1259654	1229695	97.62	4411532	65.61	4382260	0.99	65.54	38.77	38	4359281	0.99	65.5	38.94	38	5417	435	280	29272	3040
2022-07-21	IT3377	200722	800259	786776	98.32	4411532	65.61	4373600	0.99	65.49	24.76	24	4332608	0.98	65.43	24.95	24	8556	844	490	37932	4791
2022-07-21	IT3378	200722	2612778	2577490	98.65	4411532	65.61	4378273	0.99	65.59	81.46	82	4365447	0.99	65.56	81.68	83	2024	432	265	33259	1082
2022-07-21	IT3379	200722	2094815	2068514	98.74	4411532	65.61	4389208	0.99	65.57	64.68	65	4377654	0.99	65.54	64.84	65	2653	363	163	22324	1387
2022-07-21	IT3380	200722	1797392	1769462	98.45	4411532	65.61	4373549	0.99	65.57	55.29	55	4357002	0.99	65.54	55.48	55	3757	641	386	37983	2074
2022-07-21	IT3382	200722	839370	827219	98.55	4411532	65.61	4382293	0.99	65.51	26.01	26	4345483	0.99	65.45	26.18	26	6865	540	252	29239	3839
2022-07-21	IT3383	200722	1979231	1950020	98.52	4411532	65.61	4375029	0.99	65.56	60.74	61	4362533	0.99	65.53	60.89	61	4508	608	422	36503	2486
2022-07-21	IT3384	200722	2560746	2516661	98.28	4411532	65.61	4372470	0.99	65.57	74.41	73	4362600	0.99	65.55	74.57	73	4111	564	469	39062	2234
2022-07-21	IT3385	200722	2487188	2456893	98.78	4411532	65.61	4390242	1	65.57	76.95	76	4379229	0.99	65.54	77.12	76	3239	375	378	21290	1753
2022-07-21	IT3386	200722	891966	878398	98.48	4411532	65.61	4375417	0.99	65.5	27.44	27	4334145	0.98	65.43	27.65	28	6418	552	289	36115	3758
2022-07-21	IT3387	200722	1407499	1387314	98.57	4411532	65.61	4386160	0.99	65.56	43.99	43	4362856	0.99	65.52	44.19	43	4338	363	344	25372	2384
2022-07-21	IT3388	200722	2645481	2608594	98.61	4411532	65.61	4386411	0.99	65.59	81.33	82	4373617	0.99	65.56	81.55	82	2404	368	333	25121	1174
2022-07-21	IT3390	200722	2022308	1990141	98.41	4411532	65.61	4332793	0.98	65.57	63	63	4307575	0.98	65.53	63.33	63	5474	703	474	78739	3091
2022-07-21	IT3391	200722	2671314	2635304	98.65	4411532	65.61	4395348	1	65.59	83.59	83	4382692	0.99	65.57	83.8	83	1593	402	171	16184	830
2022-07-21	IT3392	200722	2216736	2186759	98.65	4411532	65.61	4363309	0.99	65.59	69.74	68	4347521	0.99	65.55	69.97	68	2185	541	303	48223	1137
2022-07-21	IT3393	200722	2698763	2568708	95.18	4411532	65.61	4386570	0.99	65.5	61.36	60	4384712	0.99	65.5	61.38	60	8290	829	419	24962	4578
2022-07-21	IT3394	200722	670472	658284	98.18	4411532	65.61	4341965	0.98	65.37	20.24	20	4291974	0.97	65.32	20.43	20	12601	846	463	69567	7392
2022-07-21	IT3395	200722	1705155	1674852	98.22	4411532	65.61	4379611	0.99	65.57	53.25	52	4352261	0.99	65.51	53.54	52	3857	611	570	31921	2020
2022-07-21	IT3396	200722	2704436	2635229	97.44	4411532	65.61	4394048	1	65.51	72.34	73	4390325	1	65.5	72.4	73	7120	504	300	17484	3790
2022-07-21	IT3397	200722	2786227	2747804	98.62	4411532	65.61	4394324	1	65.58	87.11	88	4379095	0.99	65.54	87.39	88	2136	458	279	17208	1083
2022-07-21	IT3425	200722	3114780	3052042	97.99	4411532	65.61	4391875	1	65.6	95.86	66	4381326	0.99	65.59	96.07	66	3239	509	364	19657	1714
2022-07-21	IT3426	200722	3084266	3036011	98.44	4411532	65.61	4389494	1	65.58	96.51	98	4371895	0.99	65.54	96.86	98	3382	722	535	22038	1756
2022-07-21	IT3427	200722	3445973	3381217	98.12	4411532	65.61	4395666	1	65.59	100.16	98	4389325	0.99	65.58	100.3	98	2385	325	264	15866	1221
2022-07-21	IT3428	200722	880056	862353	97.99	4411532	65.61	4384494	0.99	65.43	25.25	25	4353322	0.99	65.38	25.39	25	11707	906	383	27038	6949
2022-07-21	IT3429	200722	1963290	1936104	98.62	4411532	65.61	4392952	1	65.54	60.71	61	4373724	0.99	65.5	60.95	61	4740	617	363	18580	2616
2022-07-21	IT3430	200722	1502997	1478988	98.4	4411532	65.61	4388795	0.99	65.53	46.67	47	4362920	0.99	65.47	46.91	47	4498	484	278	22737	2366
2022-07-21	IT3431	200722	3517776	3457598	98.29	4411532	65.61	4379321	0.99	65.58	110.3	113	4358396	0.99	65.54	110.8	113	3282	716	541	32211	1695
2022-07-21	IT3432	200722	3760468	3665831	97.48	4411532	65.61	4357327	0.99	65.61	101.75	102	4352737	0.99	65.6	101.85	102	2795	537	282	54205	1349
2022-07-21	IT3433	200722	3006347	2961045	98.49	4411532	65.61	4371805	0.99	65.57	94.43	95	4357833	0.99	65.54	94.71	95	1992	344	330	39727	1003
2022-07-21	IT3434	200722	3168073	3126063	98.67	4411532	65.61	4380785	0.99	65.59	99.41	100	4365281	0.99	65.56	99.74	100	2038	457	328	30747	1070
2022-07-21	IT3435	200722	3377012	3268725	96.79	4411532	65.61	4402629	1	65.59	87.56	84	4398588	1	65.59	87.63	84	4034	807	397	8903	2135
2022-07-21	IT3436	200722	2280363	2162239	94.82	4411532	65.61	4400121	1	65.44	47.47	47	4398576	1	65.43	47.49	47	14242	1123	359	11411	8354
2022-07-21	IT3437	200722	1897325	1872093	98.67	4411532	65.61	4389562	1	65.58	59.46	60	4365846	0.99	65.52	59.75	60	2569	437	277	21970	1273
2022-07-21	IT3438	200722	3770522	3703160	98.21	4411532	65.61	4333270	0.98	65.6	112.12	111	4322968	0.98	65.58	112.37	111	4193	1102	666	78262	2160
2022-07-21	IT3439	200722	3192650	3151982	98.73	4411532	65.61	4370381	0.99	65.59	99.72	101	4353675	0.99	65.55	100.07	101	2486	553	407	41151	1310
2022-07-21	IT3440	200722	2370934	2338311	98.62	4411532	65.61	4392055	1	65.58	73.57	72	4372068	0.99	65.53	73.88	73	2831	647	353	19477	1476
2022-07-21	IT3441	200722	784266	771937	98.43	4411532	65.61	4379206	0.99	65.53	24.26	24	4340107	0.98	65.47	24.43	24	5964	554	315	32326	3358
2022-07-21	IT3442	200722	2375566	2310173	97.25	4411532	65.61	4382171	0.99	65.59	73.44	73	4365427	0.99	65.55	73.7	73	2354	452	302	29361	1140
2022-07-21	IT3443	200722	2540381	2506113	98.65	4411532	65.61	4395846	1	65.59	79.82	80	4381770	0.99	65.55	80.05	80	2495	361	324	15686	1215
2022-07-21	IT3444	200722	1648343	1580434	95.88	4411532	65.61	4357197	0.99	65.56	49.54	49	4335563	0.98	65.51	49.76	49	3752	599	272	54335	1805
2022-07-21	IT3456	200722	3384603	3301349	97.54	4411532	65.61	4384049	0.99	65.61	92.87	90	4381121	0.99	65.61	92.93	90	2855	454	390	27483	1396
2022-07-21	IT3460	200722	1710058	1684361	98.5	4411532	65.61	4397073	1	65.56	50.39	50	4384118	0.99	65.53	50.52	50	5043	316	202	14459	2700
2022-07-21	IT3463	200722	4070585	4008420	98.47	4411532	65.61	4353539	0.99	65.58	123.15	125	4344096	0.98	65.56	123.4	125	3607	653	508	57993	1885
2022-08-18	IT3258	180822	2105728	2065739	98.1	4411532	65.61	4385756	0.99	65.6	64.42	63	4185421	0.95	67.83	65.34	64	876	239	126	25776	453
2022-08-18	IT3259	180822	3471207	3425285	98.68	4411532	65.61	4398197	1	65.61	106.16	104	4303620	0.98	66.59	107.02	104	937	204	121	13335	491
2022-08-18	IT3260	180822	2824554	2786495	98.65	4411532	65.61	4389580	1	65.6	86.32	86	4255988	0.96	67.18	87.02	86	857	122	88	21952	432
2022-08-18	IT3261	180822	203189	197917	97.41	4411532	65.61	4218249	0.96	65.54	5.57	5	744091	0.17	65.37	10.49	10	158	4	5	193283	76
2022-08-18	IT3398	180822	1917445	1883262	98.22	4411532	65.61	4388164	0.99	65.6	57.95	59	4311341	0.98	65.48	58.76	59	909	117	96	23368	466
2022-08-18	IT3412	180822	584518	566192	96.86	4411532	65.61	4398676	1	65.59	16.69	16	3837457	0.87	65.55	17.86	17	743	50	46	12856	398
2022-08-18	IT3413	180822	1113932	1096761	98.46	4411532	65.61	4388509	0.99	65.58	33.66	32	4274623	0.97	65.47	34.28	32	1356	174	163	23023	710
2022-08-18	IT3414	180822	468679	457050	97.52	4411532	65.61	4365526	0.99	65.58	12.78	12	3187347	0.72	65.43	14.95	14	1027	110	88	46006	546
2022-08-18	IT3415	180822	1823838	1791586	98.23	4411532	65.61	4357544	0.99	65.61	56.61	46	4143875	0.94	65.77	59.02	49	858	196	83	53988	447
2022-08-18	IT3416	180822	546391	525026	96.09	4411532	65.61	4351571	0.99	65.59	14.05	14	3504510	0.79	65.66	15.77	15	669	91	79	59961	381
2022-08-18	IT3417	180822	2796474	2754365	98.49	4411532	65.61	4397946	1	65.61	83.54	83	4364910	0.99	65.54	84.08	83	1431	252	125	13586	778
2022-08-18	IT3418	180822	830068	811308	97.74	4411532	65.61	4377215	0.99	65.58	24.09	23	4191440	0.95	65.66	24.73	24	887	86	87	34317	448
2022-08-18	IT3419	180822	1488380	1455743	97.81	4411532	65.61	4399967	1	65.6	39.94	39	4276135	0.97	67.01	40.27	40	567	110	44	11565	301
2022-08-18	IT3420	180822	681240	667741	98.02	4411532	65.61	4376999	0.99	65.58	19.5	19	4015586	0.91	65.58	20.43	20	726	97	89	34533	385
2022-08-18	IT3421	180822	1385427	1363357	98.41	4411532	65.61	4372281	0.99	65.6	41.69	42	4298179	0.97	65.49	42.23	42	1412	194	135	39251	752
2022-08-18	IT3675	180822	200916	166609	82.92	4411532	65.61	3839220	0.87	65.49	4.26	4	380838	0.09	66.94	9.7	9	135	4	2	572312	25
2022-08-18	IT3676	180822	716540	703620	98.2	4411532	65.61	4384972	0.99	65.59	21.78	21	4002439	0.91	65.72	22.97	22	474	43	36	26560	266
2022-08-18	IT3681	180822	2669851	2618731	98.09	4411532	65.61	4401956	1	65.61	81.93	73	4309671	0.98	65.64	83.44	74	1440	303	180	9576	770
2022-08-18	IT3682	180822	684277	673754	98.46	4411532	65.61	4374338	0.99	65.57	20.32	20	3962443	0.9	65.58	21.46	21	456	70	34	37194	256
2022-08-18	IT3687	180822	1480084	1445800	97.68	4411532	65.61	4400620	1	65.59	44.61	44	4335862	0.98	65.49	45.11	45	977	155	95	10912	507
2022-08-18	IT3696	180822	1285873	1264913	98.37	4411532	65.61	4402008	1	65.59	39.19	36	4323409	0.98	65.53	39.68	36	986	208	84	9524	512
2022-08-18	IT3700	180822	4381782	4332888	98.88	4411532	65.61	4388813	0.99	65.6	137.02	140	4359940	0.99	65.55	137.83	141	861	142	116	22719	450
2022-08-18	IT3701	180822	1824419	1799510	98.63	4411532	65.61	4386653	0.99	65.61	56.69	57	4319682	0.98	65.51	57.4	58	922	238	139	24879	474
2022-08-18	IT3702	180822	2368723	2341880	98.87	4411532	65.61	4360539	0.99	65.6	74.21	75	4311728	0.98	65.51	74.91	76	806	277	104	50993	406
2022-08-18	IT3703	180822	2158697	2128234	98.59	4411532	65.61	4395177	1	65.6	66.26	67	4350387	0.99	65.53	66.81	67	383	71	38	16355	203
2022-08-18	IT3704	180822	2070990	2040657	98.54	4411532	65.61	4396387	1	65.61	63.65	65	4341750	0.98	65.51	64.31	65	934	247	120	15145	486
2022-08-18	IT3705	180822	2767531	2732206	98.72	4411532	65.61	4401503	1	65.61	86.14	88	4354044	0.99	65.51	86.94	88	358	76	56	10029	195
2022-08-18	IT3706	180822	3494893	3431604	98.19	4411532	65.61	4388070	0.99	65.61	108.3	99	4325470	0.98	65.59	109.67	100	589	163	67	23462	320
2022-08-23	IT2931	230822	400524	358144	89.42	4411532	65.61	4372112	0.99	65.57	10.5	10	2322409	0.53	71.41	13.66	13	357	59	45	39420	206
2022-08-23	IT2932	230822	1618357	1110910	68.64	4411532	65.61	4330109	0.98	65.46	32.36	22	3498422	0.79	65.03	38.73	29	1101	145	97	81423	594
2022-08-23	IT2938	230822	25011	13815	55.24	4411532	65.61	1044480	0.24	65.4	1.59	1	103	0	83.5	8.02	8	0	0	0	3367052	0
2022-08-23	IT2939	230822	725016	666777	91.97	4411532	65.61	4390074	1	65.61	18.89	18	3843163	0.87	69.16	19.88	19	796	117	80	21458	407
2022-08-23	IT3277	230822	2739461	2684733	98	4411532	65.61	4392028	1	65.6	84.18	82	4352378	0.99	65.53	84.83	83	1436	297	168	19504	773
2022-08-23	IT3279	230822	1365301	1341848	98.28	4411532	65.61	4393372	1	65.59	41.4	41	4308033	0.98	65.48	42.02	41	529	59	31	18160	294
2022-08-23	IT3280	230822	2100000	2061934	98.19	4411532	65.61	4388457	0.99	65.61	64.31	64	4332814	0.98	65.52	64.98	64	932	130	121	23075	485
2022-08-23	IT3281	230822	1840368	1814848	98.61	4411532	65.61	4356809	0.99	65.6	57.13	56	4278681	0.97	65.82	57.79	56	848	170	86	54723	452
2022-08-23	IT3282	230822	3403952	3346467	98.31	4411532	65.61	4401892	1	65.6	104.67	102	4365619	0.99	65.53	105.43	103	1437	357	174	9640	780
2022-08-23	IT3283	230822	3114749	3062707	98.33	4411532	65.61	4392505	1	65.61	96.92	97	4360738	0.99	65.55	97.53	97	566	98	55	19027	303
2022-08-23	IT3284	230822	2032757	1995339	98.16	4411532	65.61	4351957	0.99	65.57	62.19	63	4284669	0.97	65.45	63	63	2203	323	233	59575	1176
2022-08-23	IT3285	230822	3016440	2967820	98.39	4411532	65.61	4400919	1	65.61	93.53	95	4339001	0.98	65.57	94.7	95	538	86	63	10613	296
2022-08-23	IT3286	230822	2250813	2200548	97.77	4411532	65.61	4382327	0.99	65.6	66.29	66	4337612	0.98	65.52	66.85	66	832	142	138	29205	425
2022-08-23	IT3287	230822	2042110	2002646	98.07	4411532	65.61	4392381	1	65.59	61.97	62	4323820	0.98	65.46	62.78	62	1422	301	150	19151	762
2022-08-23	IT3288	230822	1684407	1660094	98.56	4411532	65.61	4357200	0.99	65.59	52.92	46	4272053	0.97	65.47	53.77	46	776	144	66	54332	384
2022-08-23	IT3289	230822	3049927	3005785	98.55	4411532	65.61	4378182	0.99	65.59	96.11	77	4319500	0.98	65.48	97.26	78	873	283	99	33350	454
2022-08-23	IT3299	230822	1785278	1761132	98.65	4411532	65.61	4381949	0.99	65.61	54.9	54	4319599	0.98	65.52	55.55	55	850	190	126	29583	467
2022-08-23	IT3399	230822	1180159	1160369	98.32	4411532	65.61	4376982	0.99	65.6	35.68	35	4298794	0.97	65.52	36.14	36	1420	200	149	34550	756
2022-08-23	IT3400	230822	7413750	7261271	97.94	4411532	65.61	4377902	0.99	65.61	226.17	215	4372356	0.99	65.6	226.42	215	878	198	84	33630	467
2022-08-23	IT3401	230822	961865	945602	98.31	4411532	65.61	4384628	0.99	65.59	28.9	28	4235405	0.96	65.55	29.57	28	803	146	116	26904	424
2022-08-23	IT3402	230822	950911	929251	97.72	4411532	65.61	4354534	0.99	65.58	27.67	27	4227824	0.96	65.49	28.21	28	2179	345	241	56998	1188
2022-08-23	IT3403	230822	369016	355380	96.3	4411532	65.61	4363476	0.99	65.59	9.67	9	2308627	0.52	65.81	12.62	12	470	43	33	48056	258
2022-08-23	IT3404	230822	2086195	2053112	98.41	4411532	65.61	4382645	0.99	65.61	62.65	62	4358491	0.99	65.59	62.92	62	907	229	97	28887	495
2022-08-23	IT3405	230822	504110	489193	97.04	4411532	65.61	4360590	0.99	65.58	13.27	13	3289625	0.75	65.2	15.44	14	1043	115	98	50942	571
2022-08-23	IT3406	230822	284984	272617	95.66	4411532	65.61	4343026	0.98	65.59	7.36	7	1364784	0.31	65.85	11.31	11	273	35	75	68506	149
2022-08-23	IT3407	230822	1181438	1160775	98.25	4411532	65.61	4386792	0.99	65.61	34.54	34	4205013	0.95	67.38	34.99	34	825	176	92	24740	446
2022-08-23	IT3408	230822	2423751	2364887	97.57	4411532	65.61	4394916	1	65.62	74.57	60	4307475	0.98	65.64	75.83	61	990	152	144	16616	509
2022-08-23	IT3409	230822	1597847	1570538	98.29	4411532	65.61	4384612	0.99	65.59	49.12	47	4280317	0.97	65.69	50.07	48	554	133	84	26920	303
2022-08-23	IT3410	230822	1954064	1922436	98.38	4411532	65.61	4381677	0.99	65.61	61.08	61	4302656	0.98	65.65	61.99	61	953	169	125	29855	498
2022-08-23	IT3411	230822	492887	475273	96.43	4411532	65.61	4378438	0.99	65.6	13.08	12	2942983	0.67	71.11	15.44	14	601	38	91	33094	316
2022-08-23	IT3464	230822	3685211	3623665	98.33	4411532	65.61	4395453	1	65.61	108.17	109	4367255	0.99	65.54	108.79	109	539	61	68	16079	281
2022-08-23	IT3465	230822	50570	46774	92.49	4411532	65.61	2363189	0.54	65.85	2.28	2	8595	0	67.82	8.6	8	7	0	0	2048343	7
2022-08-23	IT3495	230822	5213549	66094	1.27	4411532	65.61	102593	0.02	38.06	5.67	2	15	0	0	62.87	30	0	0	8	4308939	0
2022-08-23	IT3677	230822	1270557	1248192	98.24	4411532	65.61	4390147	1	65.59	38.38	38	4301454	0.98	65.5	38.96	39	789	148	76	21385	407
2022-08-23	IT3678	230822	827499	812485	98.19	4411532	65.61	4384164	0.99	65.61	25.1	23	4064780	0.92	65.82	26.37	24	869	81	110	27368	455
2022-08-23	IT3679	230822	1190031	1169374	98.26	4411532	65.61	4356247	0.99	65.61	36.41	35	4260672	0.97	65.59	36.99	35	832	213	110	55285	450
2022-08-23	IT3680	230822	844617	827380	97.96	4411532	65.61	4389290	0.99	65.59	25.08	25	4189889	0.95	65.56	25.8	25	772	127	99	22242	404
2022-08-23	IT3683	230822	3034524	2904466	95.71	4411532	65.61	4402261	1	65.61	91.69	89	4350619	0.99	65.61	92.61	90	1444	383	174	9271	774
2022-08-23	IT3684	230822	1822100	1787348	98.09	4411532	65.61	4389396	0.99	65.59	56.5	57	4327010	0.98	65.5	57.14	57	1385	308	156	22136	736
2022-08-23	IT3685	230822	708339	689325	97.32	4411532	65.61	4348564	0.99	65.59	21.98	21	4042069	0.92	65.65	22.88	22	786	164	95	62968	424
2022-08-23	IT3686	230822	2272204	2237857	98.49	4411532	65.61	4382879	0.99	65.6	71.08	68	4346610	0.99	65.55	71.55	68	574	55	69	28653	296
2022-08-23	IT3688	230822	2131305	2101050	98.58	4411532	65.61	4400257	1	65.6	66.77	67	4342650	0.98	65.5	67.47	67	1477	244	192	11275	792
2022-08-23	IT3689	230822	185218	180222	97.3	4411532	65.61	4197299	0.95	65.56	5.13	5	584636	0.13	66.11	10.52	10	63	4	7	214233	29
2022-08-23	IT3690	230822	1860357	1830228	98.38	4411532	65.61	4395805	1	65.6	57.79	52	4335887	0.98	65.52	58.38	52	840	178	124	15727	434
2022-08-23	IT3691	230822	1819174	1792807	98.55	4411532	65.61	4362450	0.99	65.6	56.86	51	4317124	0.98	65.55	57.32	51	830	210	92	49082	414
2022-08-23	IT3692	230822	1847941	1813945	98.16	4411532	65.61	4385086	0.99	65.61	55.11	55	4346238	0.99	65.55	55.51	55	875	146	104	26446	481
2022-08-23	IT3693	230822	2172215	2142121	98.61	4411532	65.61	4358719	0.99	65.59	68.23	68	4296944	0.97	65.49	69.02	68	797	208	75	52813	399
2022-08-23	IT3694	230822	1619495	1590864	98.23	4411532	65.61	4363047	0.99	65.59	50.44	49	4291462	0.97	65.5	51.07	50	752	202	75	48485	382
2022-08-23	IT3695	230822	2113771	2084022	98.59	4411532	65.61	4379583	0.99	65.59	66.54	66	4314091	0.98	65.51	67.35	66	534	104	51	31949	281
2022-08-23	IT3697	230822	1539104	1499397	97.42	4411532	65.61	4388730	0.99	65.62	46.16	45	4318424	0.98	65.54	46.73	46	946	137	99	22802	488
2022-08-23	IT3698	230822	1595930	1564102	98.01	4411532	65.61	4383414	0.99	65.58	48.03	48	4323445	0.98	65.5	48.54	48	998	121	81	28118	519
2022-08-23	IT3794	230822	3157561	3097591	98.1	4411532	65.61	4395496	1	65.6	95.07	95	4356387	0.99	65.51	95.81	95	1402	262	162	16036	753
2022-08-23	IT3796	230822	3115033	3059502	98.22	4411532	65.61	4384971	0.99	65.6	96.81	95	4341652	0.98	65.51	97.62	95	979	196	128	26561	490
2022-08-23	IT3797	230822	2318507	2263647	97.63	4411532	65.61	4383170	0.99	65.59	72.09	72	4315680	0.98	65.48	73.01	73	943	199	95	28362	482
2022-09-13	IT3066	70922	1923407	1893610	98.45	4411532	65.61	4382779	0.99	65.59	57.95	58	4369839	0.99	65.57	58.09	58	3447	511	302	28753	1886
2022-09-13	IT3079	70922	1333935	1311775	98.34	4411532	65.61	4390543	1	65.56	40.71	40	4372747	0.99	65.54	40.84	40	5992	602	309	20989	3466
2022-09-13	IT3087	70922	1733942	1710208	98.63	4411532	65.61	4388850	0.99	65.55	52.9	52	4373214	0.99	65.52	53.05	52	4896	478	371	22682	2679
2022-09-13	IT3092	70922	2177799	2140197	98.27	4411532	65.61	4397396	1	65.54	65.8	64	4385139	0.99	65.52	65.96	64	6822	714	600	14136	3800
2022-09-13	IT3098	70922	1457159	1433150	98.35	4411532	65.61	4390152	1	65.49	44.38	43	4367797	0.99	65.45	44.57	43	8485	600	354	21380	4816
2022-09-13	IT3099	70922	1948802	1924044	98.73	4411532	65.61	4378621	0.99	65.59	60.07	59	4356467	0.99	65.55	60.34	59	2855	327	300	32911	1583
2022-09-13	IT3100	70922	1816484	1789909	98.54	4411532	65.61	4401907	1	65.54	54.99	54	4390246	1	65.53	55.11	54	5871	640	341	9625	3263
2022-09-13	IT3110	70922	1147615	1128551	98.34	4411532	65.61	4389219	0.99	65.43	34.8	34	4366273	0.99	65.4	34.94	34	11503	522	333	22313	6700
2022-09-13	IT3113	70922	1321598	1304595	98.71	4411532	65.61	4382850	0.99	65.5	40.45	40	4362858	0.99	65.47	40.6	40	7260	435	246	28682	4188
2022-09-13	IT3115	70922	1178906	1163707	98.71	4411532	65.61	4385247	0.99	65.35	35.89	33	4363345	0.99	65.31	36.03	33	13561	378	196	26285	7839
2022-09-13	IT3125	70922	719621	709450	98.59	4411532	65.61	4347961	0.99	65.51	22.18	22	4301247	0.98	65.46	22.35	22	6131	371	190	63571	3635
2022-09-13	IT3126	70922	881794	870933	98.77	4411532	65.61	4392994	1	65.49	26.94	26	4361869	0.99	65.45	27.08	26	7682	540	272	18538	4401
2022-09-13	IT3128	70922	870962	857133	98.41	4411532	65.61	4380019	0.99	65.5	26.58	26	4346897	0.99	65.46	26.73	26	8178	428	321	31513	4670
2022-09-13	IT3131	70922	1316543	1297801	98.58	4411532	65.61	4384353	0.99	65.52	40.3	40	4362324	0.99	65.48	40.46	40	7012	430	347	27179	4097
2022-09-13	IT3132	70922	1191584	1175895	98.68	4411532	65.61	4393703	1	65.53	36.35	35	4370038	0.99	65.5	36.51	35	5716	504	357	17829	3299
2022-09-13	IT3276	70922	2550718	2357685	92.43	4411532	65.61	4386949	0.99	65.58	68.62	69	4377117	0.99	65.56	68.76	69	2971	345	253	24583	1621
2022-09-13	IT3312	70922	1424848	1403230	98.48	4411532	65.61	4361510	0.99	65.51	43.18	41	4335213	0.98	65.49	43.4	41	6301	341	277	50022	3616
2022-09-13	IT3313	70922	936814	922429	98.46	4411532	65.61	4392399	1	65.38	28.38	28	4361826	0.99	65.35	28.53	28	12528	401	289	19133	7415
2022-09-13	IT3315	70922	2216013	2169425	97.9	4411532	65.61	4385979	0.99	65.53	64.25	44	4379186	0.99	65.53	64.34	44	7359	470	269	25553	4165
2022-09-13	IT3316	70922	774179	761932	98.42	4411532	65.61	4358791	0.99	64.98	23.37	23	4328520	0.98	64.95	23.49	23	30324	551	221	52741	17737
2022-09-13	IT3319	70922	2406099	2373489	98.64	4411532	65.61	4356769	0.99	65.57	73.65	67	4341549	0.98	65.55	73.88	67	3471	601	264	54763	1903
2022-09-13	IT3320	70922	904112	890513	98.5	4411532	65.61	4379429	0.99	65.29	27.49	27	4351428	0.99	65.25	27.63	27	15975	382	216	32103	9402
2022-09-13	IT3327	70922	2436595	2393993	98.25	4411532	65.61	4383455	0.99	65.46	73.13	73	4372764	0.99	65.44	73.3	73	10255	702	567	28077	5960
2022-09-13	IT3328	70922	1182039	1162312	98.33	4411532	65.61	4389248	0.99	65.23	35.5	35	4367999	0.99	65.19	35.64	35	19960	490	305	22284	11699
2022-09-13	IT3338	70922	2901717	2861765	98.62	4411532	65.61	4397006	1	65.57	87.09	70	4389884	1	65.56	87.21	70	3867	345	148	14526	2240
2022-09-13	IT3422	70922	1630799	1568019	96.15	4411532	65.61	4388280	0.99	65.52	44.16	44	4379082	0.99	65.51	44.24	44	8289	591	235	23252	4660
2022-09-13	IT3423	70922	1849443	1482563	80.16	4411532	65.61	4387726	0.99	65.37	39.32	39	4378300	0.99	65.35	39.39	39	17007	999	382	23806	9724
2022-09-13	IT3424	70922	1286250	1087797	84.57	4411532	65.61	4386009	0.99	65.38	28.61	28	4374721	0.99	65.37	28.66	28	17356	1121	452	25523	9962
2022-09-13	IT3480	70922	3407191	3360710	98.64	4411532	65.61	4393792	1	65.61	104.12	106	4381671	0.99	65.58	104.39	106	3155	718	387	17740	1741
2022-09-13	IT3481	70922	1017332	1002681	98.56	4411532	65.61	4355374	0.99	65.46	30.83	30	4320954	0.98	65.41	31.03	31	7827	411	177	56158	4672
2022-09-13	IT3482	70922	4358038	4052353	92.99	4411532	65.61	4399397	1	65.59	121.15	112	4393106	1	65.58	121.31	112	3378	279	167	12135	1661
2022-09-13	IT3483	70922	2761371	2725455	98.7	4411532	65.61	4385364	0.99	65.6	84.96	87	4368026	0.99	65.56	85.27	87	2079	286	167	26168	1202
2022-09-13	IT3484	70922	2587184	2552517	98.66	4411532	65.61	4393152	1	65.59	78.68	76	4376430	0.99	65.58	78.95	77	2100	171	188	18380	1175
2022-09-13	IT3485	70922	1842187	1811264	98.32	4411532	65.61	4389273	0.99	65.57	55.61	56	4369859	0.99	65.53	55.82	56	3137	263	257	22259	1817
2022-09-13	IT3486	70922	2268856	2238757	98.67	4411532	65.61	4359525	0.99	65.57	69.63	70	4345119	0.98	65.55	69.84	71	2869	413	229	52007	1654
2022-09-13	IT3487	70922	3842652	3781027	98.4	4411532	65.61	4387452	0.99	65.6	116.16	100	4377928	0.99	65.58	116.39	100	3030	399	389	24080	1646
2022-09-13	IT3488	70922	2967338	2916347	98.28	4411532	65.61	4384552	0.99	65.6	89.69	72	4372242	0.99	65.58	89.91	73	3430	386	350	26980	1863
2022-09-13	IT3489	70922	4625247	4557483	98.53	4411532	65.61	4361579	0.99	65.61	134.33	135	4355038	0.99	65.6	134.53	135	2494	324	242	49953	1437
2022-09-13	IT3490	70922	3853504	3791667	98.4	4411532	65.61	4356623	0.99	65.58	118.97	121	4343365	0.98	65.55	119.3	121	3736	710	483	54909	1968
2022-09-13	IT3491	70922	4158342	4090738	98.37	4411532	65.61	4399671	1	65.6	124.49	126	4389744	1	65.58	124.76	126	2287	323	205	11861	1264
2022-09-13	IT3492	70922	4250265	4195783	98.72	4411532	65.61	4378007	0.99	65.6	127.67	130	4361557	0.99	65.57	128.13	130	3259	560	398	33525	1839
2022-09-13	IT3493	70922	4811128	4741156	98.55	4411532	65.61	4380880	0.99	65.62	142.62	143	4375812	0.99	65.61	142.77	144	2833	383	299	30652	1613
2022-09-13	IT3494	70922	2704166	2661686	98.43	4411532	65.61	4384453	0.99	65.57	82.86	81	4368997	0.99	65.53	83.12	81	3410	469	347	27079	1812
2022-09-13	IT3496	70922	5614563	5332940	94.98	4411532	65.61	4381627	0.99	65.63	159.46	161	4377491	0.99	65.62	159.6	161	2587	432	350	29905	1308
2022-09-13	IT3497	70922	5548602	5377298	96.91	4411532	65.61	4373680	0.99	65.62	155.11	157	4369870	0.99	65.61	155.24	157	2282	523	250	37852	1363
2022-09-13	IT3498	70922	5763402	5612109	97.37	4411532	65.61	4390102	1	65.63	166.39	170	4386089	0.99	65.62	166.53	170	2823	508	379	21430	1569
2022-09-13	IT3499	70922	5834293	5600739	96	4411532	65.61	4383423	0.99	65.59	167.8	173	4376102	0.99	65.57	168.07	173	2158	263	199	28109	1283
2022-09-13	IT3500	70922	3593047	3491703	97.18	4411532	65.61	4375878	0.99	65.61	106.97	108	4364981	0.99	65.58	107.22	108	3048	728	410	35654	1707
2022-09-13	IT3501	70922	4888180	3665825	74.99	4411532	65.61	4393050	1	65.61	112.14	114	4381596	0.99	65.59	112.41	114	2828	545	329	18482	1401
2022-09-13	IT3502	70922	4903387	4664703	95.13	4411532	65.61	4394187	1	65.63	140.02	141	4387974	0.99	65.61	140.21	141	3040	395	307	17345	1601
2022-09-13	IT3503	70922	2828820	2563061	90.61	4411532	65.61	4390727	1	65.59	76.19	77	4380905	0.99	65.57	76.35	77	2182	274	156	20805	1206
2022-09-13	IT3504	70922	3956469	3817045	96.48	4411532	65.61	4386603	0.99	65.61	111.43	114	4377273	0.99	65.58	111.66	114	2066	339	189	24929	1187
2022-09-13	IT3505	70922	5406234	5138859	95.05	4411532	65.61	4392986	1	65.61	155.86	160	4384998	0.99	65.59	156.13	160	2569	447	346	18546	1395
2022-09-13	IT3506	70922	4808406	4666574	97.05	4411532	65.61	4392627	1	65.63	128.92	130	4388452	0.99	65.61	129.04	130	3100	545	323	18905	1686
2022-09-13	IT3507	70922	4480643	4385096	97.87	4411532	65.61	4380918	0.99	65.61	130.09	133	4372239	0.99	65.59	130.34	133	2269	489	234	30614	1254
2022-09-13	IT3508	70922	5734770	5620895	98.01	4411532	65.61	4382628	0.99	65.59	167.14	171	4377740	0.99	65.58	167.31	171	2470	472	345	28904	1384
2022-09-13	IT3510	70922	5984034	5829706	97.42	4411532	65.61	4390199	1	65.63	170.68	174	4386457	0.99	65.62	170.82	174	2897	447	332	21333	1581
2022-09-13	IT3512	70922	3312092	3184438	96.15	4411532	65.61	4393975	1	65.62	95.29	97	4386512	0.99	65.6	95.44	97	2665	389	341	17557	1412
2022-09-16	IT3513	70922	5342429	5207103	97.47	4411532	65.61	4397367	1	65.61	155.18	159	4390598	1	65.6	155.41	159	2780	454	332	14165	1461
2022-09-16	IT3514	70922	19761	19055	96.43	4411532	65.61	1617336	0.37	64.86	1.57	1	554056	0.13	64.8	2.46	2	334	38	9	2794196	152
2022-09-16	IT3515	70922	4604618	4467436	97.02	4411532	65.61	4389094	0.99	65.62	135.69	140	4379978	0.99	65.59	135.96	140	2065	355	210	22438	1163
2022-09-16	IT3516	70922	6650415	6472585	97.33	4411532	65.61	4388807	0.99	65.62	185.12	190	4385192	0.99	65.62	185.27	190	2627	542	265	22725	1546
2022-09-16	IT3517	70922	4391825	4234016	96.41	4411532	65.61	4385501	0.99	65.61	128.96	129	4377774	0.99	65.59	129.18	129	2178	419	285	26031	1196
2022-09-16	IT3518	70922	4787511	4652911	97.19	4411532	65.61	4405321	1	65.62	137.08	139	4401938	1	65.61	137.18	139	2255	351	207	6211	1280
2022-09-16	IT3519	70922	5451873	5262280	96.52	4411532	65.61	4403142	1	65.62	155.18	158	4398358	1	65.61	155.34	158	1965	360	146	8390	1147
2022-09-16	IT3520	70922	4786131	4609125	96.3	4411532	65.61	4393788	1	65.62	139.27	143	4386712	0.99	65.61	139.48	143	2613	477	291	17744	1469
2022-09-16	IT3522	70922	6345081	6173853	97.3	4411532	65.61	4389886	1	65.62	188.57	191	4384529	0.99	65.6	188.79	191	2225	483	263	21646	1219
2022-09-16	IT3523	70922	5711540	5476890	95.89	4411532	65.61	4387609	0.99	65.62	163.99	169	4381947	0.99	65.6	164.19	169	2263	366	177	23923	1327
2022-09-16	IT3524	70922	6185636	5973666	96.57	4411532	65.61	4388754	0.99	65.62	173.52	178	4383479	0.99	65.61	173.72	178	2291	577	199	22778	1318
2022-09-16	IT3525	70922	5288581	5148419	97.35	4411532	65.61	4402555	1	65.62	144.41	146	4398918	1	65.61	144.52	146	2560	786	270	8977	1384
2022-09-16	IT3526	70922	5171902	5017101	97.01	4411532	65.61	4389698	1	65.62	151.73	155	4383849	0.99	65.6	151.92	155	2180	336	283	21834	1250
2022-09-16	IT3527	70922	4913714	4758973	96.85	4411532	65.61	4336894	0.98	65.63	146.56	152	4327597	0.98	65.61	146.86	152	4079	906	599	74638	2290
2022-09-16	IT3528	70922	2757021	2663344	96.6	4411532	65.61	4382504	0.99	65.6	73.26	74	4373431	0.99	65.59	73.4	74	4382	669	571	29028	2371
2022-09-16	IT3529	70922	3906338	3790745	97.04	4411532	65.61	4396018	1	65.59	117.05	119	4384806	0.99	65.56	117.33	120	2769	598	300	15514	1479
2022-09-16	IT3530	70922	4360500	4216832	96.71	4411532	65.61	4400096	1	65.61	128.03	131	4390992	1	65.59	128.27	131	2022	207	198	11436	1186
2022-09-16	IT3532	70922	4211416	4094204	97.22	4411532	65.61	4337584	0.98	65.63	124.93	129	4323307	0.98	65.61	125.32	129	3992	893	536	73948	2243
2022-09-16	IT3533	70922	5596354	5423948	96.92	4411532	65.61	4395642	1	65.62	153.29	157	4391517	1	65.61	153.42	157	2447	611	313	15890	1391
2022-09-16	IT3534	70922	5391207	5278816	97.92	4411532	65.61	4394104	1	65.61	153.94	157	4388782	0.99	65.6	154.12	157	2454	471	351	17428	1436
2022-09-16	IT3536	70922	6163807	5806894	94.21	4411532	65.61	4389110	0.99	65.62	168.8	173	4383984	0.99	65.6	168.99	173	2233	369	176	22422	1249
2022-09-16	IT3537	70922	5319746	5161531	97.03	4411532	65.61	4385420	0.99	65.61	156.27	159	4378479	0.99	65.59	156.51	160	2110	541	241	26112	1240
2022-09-16	IT3538	70922	5954126	5830003	97.92	4411532	65.61	4394967	1	65.62	172.21	171	4389889	1	65.6	172.4	171	2577	572	343	16565	1456
2022-09-16	IT3539	70922	5027488	4923825	97.94	4411532	65.61	4393790	1	65.63	145.39	146	4388747	0.99	65.62	145.55	146	2947	468	344	17742	1598
2022-09-16	IT3540	70922	3633597	3530242	97.16	4411532	65.61	4392202	1	65.62	109.19	109	4381218	0.99	65.59	109.44	109	2725	464	375	19330	1469
2022-09-16	IT3542	70922	1330529	1276635	95.95	4411532	65.61	4361095	0.99	65.49	37.82	38	4329905	0.98	65.42	38.06	38	8101	766	366	50437	4911
2022-09-16	IT3543	70922	5814123	5672713	97.57	4411532	65.61	4391775	1	65.61	163.28	163	4385904	0.99	65.59	163.49	164	2638	359	332	19757	1479
2022-09-16	IT3544	70922	7030987	6778687	96.41	4411532	65.61	4408609	1	65.62	195.95	197	4405155	1	65.62	196.1	197	3000	515	383	2923	1628
2022-09-16	IT3545	70922	4266730	4136753	96.95	4411532	65.61	4394245	1	65.61	126.06	127	4386689	0.99	65.59	126.26	127	2429	367	367	17287	1365
2022-09-16	IT3546	70922	5806664	5677789	97.78	4411532	65.61	4391854	1	65.63	170.63	173	4386986	0.99	65.62	170.81	173	2833	461	328	19678	1594
2022-09-16	IT3548	70922	6225630	6028700	96.84	4411532	65.61	4392182	1	65.62	176.37	180	4386366	0.99	65.61	176.6	180	2280	295	203	19350	1327
2022-09-16	IT3549	70922	5026302	4916844	97.82	4411532	65.61	4392151	1	65.61	145.58	146	4386770	0.99	65.59	145.75	146	2170	309	167	19381	1289
2022-09-16	IT3550	70922	2472959	2397872	96.96	4411532	65.61	4377349	0.99	65.6	71.49	73	4363293	0.99	65.57	71.7	73	2725	300	364	34183	1461
2022-09-16	IT3551	70922	5845901	5635337	96.4	4411532	65.61	4337948	0.98	65.64	164.43	168	4330469	0.98	65.63	164.7	168	4280	758	561	73584	2427
2022-09-16	IT3552	70922	4328971	4245489	98.07	4411532	65.61	4402957	1	65.62	126.41	128	4394195	1	65.6	126.64	128	3213	727	365	8575	1771
2022-09-16	IT3553	70922	3757431	3644906	97.01	4411532	65.61	4399673	1	65.61	109.63	112	4389071	0.99	65.58	109.88	112	2091	284	189	11859	1219
2022-09-16	IT3554	70922	3815228	3696638	96.89	4411532	65.61	4360299	0.99	65.61	113.55	116	4351254	0.99	65.58	113.77	116	2221	512	243	51233	1275
2022-09-16	IT3555	70922	3567006	3450428	96.73	4411532	65.61	4400760	1	65.61	104.9	107	4389432	0.99	65.58	105.15	107	2064	284	194	10772	1214
2022-09-16	IT3556	70922	4776410	4669239	97.76	4411532	65.61	4387974	0.99	65.63	139.5	142	4381534	0.99	65.61	139.69	142	2652	373	331	23558	1493
2022-09-16	IT3557	70922	4938640	4832911	97.86	4411532	65.61	4362666	0.99	65.61	146.05	148	4354727	0.99	65.59	146.31	148	2289	503	262	48866	1319
2022-09-16	IT3558	70922	2975879	2603826	87.5	4411532	65.61	4335817	0.98	65.62	78.37	80	4313778	0.98	65.59	78.74	80	4286	760	529	75715	2311
2022-09-16	IT3559	70922	3998991	3667134	91.7	4411532	65.61	4388065	0.99	65.59	107.54	110	4380671	0.99	65.56	107.7	110	4211	612	521	23467	2267
2022-09-16	IT3560	70922	4191217	3928983	93.74	4411532	65.61	4385105	0.99	65.62	118.45	121	4377854	0.99	65.6	118.64	121	2694	396	349	26427	1398
2022-09-16	IT3561	70922	3842297	3646666	94.91	4411532	65.61	4357243	0.99	65.59	111.32	114	4346704	0.99	65.56	111.57	114	3994	726	478	54289	2116
2022-09-16	IT3562	70922	6036279	5637859	93.4	4411532	65.61	4370096	0.99	65.6	171.97	177	4362783	0.99	65.59	172.25	177	2581	517	274	41436	1456
2022-09-16	IT3563	70922	6932584	5993672	86.46	4411532	65.61	4400511	1	65.61	170.24	175	4397397	1	65.61	170.35	175	2176	513	361	11021	1053
2022-09-16	IT3564	70922	3661795	3510346	95.86	4411532	65.61	4390823	1	65.61	106.64	109	4382067	0.99	65.59	106.84	109	2401	473	339	20709	1306
2022-09-16	IT3565	70922	5451500	5282537	96.9	4411532	65.61	4402099	1	65.62	152.85	155	4397515	1	65.61	153	155	3144	787	365	9433	1757
2022-09-16	IT3566	70922	4136240	3819238	92.34	4411532	65.61	4387029	0.99	65.61	114.94	118	4379793	0.99	65.6	115.12	118	2437	359	312	24503	1367
2022-09-16	IT3567	70922	2805807	2561928	91.31	4411532	65.61	4389558	1	65.62	75.77	77	4378989	0.99	65.59	75.93	77	2737	514	301	21974	1497
2022-09-16	IT3568	70922	4704379	4554810	96.82	4411532	65.61	4384769	0.99	65.63	138.23	141	4378203	0.99	65.61	138.43	141	2691	411	337	26763	1507
2022-09-16	IT3569	70922	3788192	3591692	94.81	4411532	65.61	4395947	1	65.61	107.96	110	4388394	0.99	65.59	108.13	110	2051	411	202	15585	1152
2022-09-16	IT3570	70922	5434456	5226358	96.17	4411532	65.61	4405358	1	65.62	157.42	153	4400239	1	65.61	157.59	153	2772	437	349	6174	1531
2022-09-16	IT3572	70922	3506846	3181539	90.72	4411532	65.61	4384358	0.99	65.61	95.27	97	4378258	0.99	65.6	95.39	97	2594	456	230	27174	1355
2022-09-16	IT3573	70922	2992932	2885059	96.4	4411532	65.61	4380754	0.99	65.62	85.93	87	4371808	0.99	65.6	86.09	87	2644	332	318	30778	1434
2022-09-16	IT3574	70922	4921938	4807791	97.68	4411532	65.61	4394051	1	65.62	144.14	147	4387729	0.99	65.6	144.34	147	2120	361	197	17481	1225
2022-09-16	IT3584	70922	772960	752823	97.39	4411532	65.61	4382057	0.99	65.44	21.24	21	4344040	0.98	65.4	21.38	21	11694	718	355	29475	6782
2022-09-16	IT3587	70922	4471308	4389767	98.18	4411532	65.61	4367215	0.99	65.6	133.28	137	4360803	0.99	65.59	133.47	137	2614	612	254	44317	1461
2022-09-16	IT3671	70922	1387029	1330019	95.89	4411532	65.61	4379922	0.99	65.49	38.71	39	4357559	0.99	65.45	38.88	39	7135	410	165	31610	4186
2022-09-16	IT3672	70922	1052685	1019389	96.84	4411532	65.61	4392034	1	65.46	29.81	30	4361606	0.99	65.4	29.99	30	8652	330	194	19498	5093
2022-09-16	IT3673	70922	1703538	1650109	96.86	4411532	65.61	4383875	0.99	65.57	49.43	50	4362925	0.99	65.53	49.64	50	3841	406	276	27657	2228
2022-09-16	IT3675	70922	427679	347652	81.29	4411532	65.61	4300584	0.97	65.01	7.94	7	4064435	0.92	66.13	8.24	8	29037	443	307	110948	17278
2022-09-16	IT3676	70922	1538218	1508825	98.09	4411532	65.61	4389246	0.99	65.47	46.09	45	4378570	0.99	65.45	46.19	45	8458	374	250	22286	4947
2022-09-16	IT3707	70922	6079907	5946205	97.8	4411532	65.61	4390490	1	65.62	171.27	176	4386728	0.99	65.61	171.41	176	2365	580	265	21042	1392
2022-09-16	IT3711	70922	5608056	5350111	95.4	4411532	65.61	4388723	0.99	65.61	154.07	157	4382506	0.99	65.59	154.28	157	2262	509	288	22809	1322
2022-09-16	IT3712	70922	3897348	3814864	97.88	4411532	65.61	4396718	1	65.6	115.3	117	4388506	0.99	65.58	115.51	117	2265	592	379	14814	1284
2022-09-16	IT3713	70922	6370003	6175014	96.94	4411532	65.61	4388003	0.99	65.61	172.42	176	4385458	0.99	65.61	172.51	176	3369	741	427	23529	1862
2022-09-16	IT3714	70922	6348322	6201108	97.68	4411532	65.61	4388298	0.99	65.62	177.09	179	4385116	0.99	65.61	177.21	179	3510	788	424	23234	1922
2022-09-16	IT3715	70922	4667693	4539117	97.25	4411532	65.61	4393323	1	65.61	136.86	140	4388136	0.99	65.59	137.01	140	3372	621	390	18209	1790
2022-09-16	IT3716	70922	5657004	5476098	96.8	4411532	65.61	4394094	1	65.61	163.98	167	4388196	0.99	65.6	164.19	167	2461	609	382	17438	1380
2022-09-16	IT3717	70922	5885211	5773295	98.1	4411532	65.61	4382830	0.99	65.62	170.79	173	4375754	0.99	65.61	171.06	173	2726	390	372	28702	1520
2022-09-16	IT3753	70922	4219975	4136110	98.01	4411532	65.61	4396393	1	65.62	124.83	121	4390640	1	65.6	124.98	121	4176	622	443	15139	2112
2022-09-16	IT3772	70922	3893714	3817578	98.04	4411532	65.61	4390696	1	65.63	115.7	115	4384803	0.99	65.62	115.84	116	3583	399	345	20836	1822
2022-09-16	IT3780	70922	3400017	3338880	98.2	4411532	65.61	4376086	0.99	65.61	102.75	101	4361004	0.99	65.58	103.09	101	3447	509	377	35446	2004
2022-09-16	IT3790	70922	3116621	3056416	98.07	4411532	65.61	4370724	0.99	65.61	93.89	87	4358771	0.99	65.59	94.12	87	3342	670	416	40808	1670
2022-09-16	IT3791	70922	3806950	3745611	98.39	4411532	65.61	4381007	0.99	65.61	116.94	114	4365659	0.99	65.58	117.32	114	3108	387	342	30525	1554
2022-09-16	IT3792	70922	1293319	1276829	98.72	4411532	65.61	4382789	0.99	65.55	40.13	40	4339237	0.98	65.47	40.48	40	2722	253	114	28743	1571
2022-09-16	IT3793	70922	719415	707701	98.37	4411532	65.61	4368110	0.99	65.54	22.27	22	4291892	0.97	65.44	22.58	22	3451	472	261	43422	1887
2022-09-16	IT3794	70922	1968082	1939731	98.56	4411532	65.61	4375532	0.99	65.6	60.58	59	4354604	0.99	65.56	60.83	59	3710	461	438	36000	1943
2022-09-16	IT3798	70922	2147094	2120450	98.76	4411532	65.61	4394631	1	65.6	66.33	66	4369897	0.99	65.55	66.67	66	2311	335	126	16901	1248
2022-09-16	IT3799	70922	2465945	2424115	98.3	4411532	65.61	4394102	1	65.59	74.61	75	4374576	0.99	65.55	74.91	75	3973	648	564	17430	2148
2022-09-16	IT3800	70922	2953430	2846198	96.37	4411532	65.61	4399171	1	65.63	83.06	80	4393789	1	65.62	83.15	80	4442	361	414	12361	2197
2022-09-16	IT3801	70922	749576	738370	98.51	4411532	65.61	4371669	0.99	65.54	23.32	23	4307185	0.98	65.45	23.59	23	3578	497	269	39863	1946
2022-09-16	IT3802	70922	2672513	2633008	98.52	4411532	65.61	4380331	0.99	65.61	82.93	82	4358763	0.99	65.56	83.3	82	2718	235	325	31201	1410
2022-09-16	IT3803	70922	3984346	3932845	98.71	4411532	65.61	4388954	0.99	65.59	123.44	124	4370856	0.99	65.54	123.92	124	2199	381	160	22578	1210
2022-09-16	IT3804	70922	4069070	4025469	98.93	4411532	65.61	4379168	0.99	65.61	126.67	128	4365447	0.99	65.57	127.05	128	2940	288	258	32364	1618
2022-09-16	IT3806	70922	1960912	1901292	96.96	4411532	65.61	4398030	1	65.61	54.16	47	4386381	0.99	65.6	54.29	47	8381	759	345	13502	3877
2022-09-16	IT3807	70922	4358119	4275865	98.11	4411532	65.61	4400684	1	65.62	129.4	133	4395045	1	65.61	129.56	133	3942	477	399	10848	2000
2022-09-16	IT3809	70922	4074737	3977033	97.6	4411532	65.61	4399754	1	65.62	120.11	109	4395157	1	65.61	120.23	109	6267	827	676	11778	2885
2022-09-16	IT3810	70922	3297312	3226064	97.84	4411532	65.61	4386725	0.99	65.63	96.45	88	4381585	0.99	65.62	96.55	88	5351	416	339	24807	2277
2022-09-16	IT3811	70922	3251761	3177257	97.71	4411532	65.61	4398295	1	65.63	94.93	81	4393805	1	65.62	95.02	81	5697	468	341	13237	2305
2022-09-16	IT3812	70922	3328897	3227272	96.95	4411532	65.61	4401736	1	65.63	96.98	85	4396817	1	65.62	97.07	85	4942	376	352	9796	2102
2022-09-16	IT3813	70922	3491429	3409420	97.65	4411532	65.61	4380202	0.99	65.62	103.92	94	4374745	0.99	65.61	104.04	94	4558	389	298	31330	1970
2022-09-16	IT3814	70922	3736601	3607054	96.53	4411532	65.61	4390951	1	65.64	108.58	94	4387321	0.99	65.63	108.66	94	5073	408	338	20581	2199
2022-09-16	IT3815	70922	2183177	2154855	98.7	4411532	65.61	4371257	0.99	65.59	67.43	68	4346894	0.99	65.56	67.77	68	2165	245	222	40275	1201
2022-09-16	IT3817	70922	3515757	3440980	97.87	4411532	65.61	4401061	1	65.62	103.4	83	4395866	1	65.62	103.51	83	6240	407	203	10471	2536
2022-09-16	IT3818	70922	4124379	4038992	97.93	4411532	65.61	4381729	0.99	65.61	121.38	121	4373343	0.99	65.59	121.6	121	3116	366	311	29803	1571
2022-09-16	IT3819	70922	3996173	3906551	97.76	4411532	65.61	4399037	1	65.62	118.08	107	4394745	1	65.61	118.19	107	4214	437	296	12495	1842
2022-09-16	IT3820	70922	4356241	4257087	97.72	4411532	65.61	4379607	0.99	65.62	128.38	116	4373184	0.99	65.61	128.56	116	4035	602	408	31925	2107
2022-09-16	IT3821	70922	3614570	3500304	96.84	4411532	65.61	4370681	0.99	65.62	107.16	102	4363838	0.99	65.61	107.31	102	4044	492	302	40851	1834
2022-09-16	IT3822	70922	2660365	2579709	96.97	4411532	65.61	4398479	1	65.61	78.16	73	4388840	0.99	65.6	78.31	73	5559	713	610	13053	2660
2022-09-16	IT3823	70922	855825	835687	97.65	4411532	65.61	4384002	0.99	65.59	24.13	21	4352273	0.99	65.57	24.26	21	5170	687	300	27530	2766
2022-09-16	IT3824	70922	2518706	2461797	97.74	4411532	65.61	4380122	0.99	65.63	73.4	58	4371274	0.99	65.62	73.52	58	6601	403	329	31410	2681
2022-09-16	IT3834	70922	5394264	5190932	96.23	4411532	65.61	4389412	0.99	65.63	157.58	157	4385312	0.99	65.62	157.72	157	3739	642	366	22120	1898
2022-09-16	IT3837	70922	3948536	3825777	96.89	4411532	65.61	4393870	1	65.61	117.51	105	4383925	0.99	65.6	117.75	106	2862	398	275	17662	1367
2022-09-16	IT3887	70922	2405117	2322643	96.57	4411532	65.61	4393408	1	65.62	70.51	64	4382518	0.99	65.6	70.66	64	4956	642	437	18124	2303
2022-09-16	IT3890	70922	1773632	1712183	96.54	4411532	65.61	4381474	0.99	65.6	52.29	48	4364174	0.99	65.58	52.46	48	4760	533	256	30058	2276
2022-09-16	IT3891	70922	3185711	3101616	97.36	4411532	65.61	4396242	1	65.61	93.03	86	4388186	0.99	65.6	93.19	87	4501	625	396	15290	2081
2022-09-16	IT3893	70922	3147067	3014413	95.78	4411532	65.61	4397377	1	65.61	92.08	89	4389411	0.99	65.6	92.23	89	4290	706	471	14155	1982
2022-09-16	IT3894	70922	4375341	4233266	96.75	4411532	65.61	4391614	1	65.62	125.76	118	4387866	0.99	65.61	125.86	118	3229	261	221	19918	1483
2022-09-16	IT3895	70922	3293570	3211695	97.51	4411532	65.61	4403435	1	65.62	97.48	95	4395996	1	65.61	97.63	95	3427	295	212	8097	1636
2022-09-16	IT3896	70922	2830597	2769580	97.84	4411532	65.61	4300872	0.97	65.65	84.81	82	4289414	0.97	65.64	85.02	82	5564	852	599	110660	2873
2022-09-16	IT3897	70922	3625491	3552179	97.98	4411532	65.61	4399279	1	65.63	106.99	106	4392811	1	65.62	107.13	106	4065	382	389	12253	1881
2022-09-16	IT3899	70922	3496301	3375233	96.54	4411532	65.61	4378483	0.99	65.64	102.89	97	4370549	0.99	65.63	103.06	98	3732	462	378	33049	1683
2022-09-16	IT3902	70922	2732897	2669751	97.69	4411532	65.61	4383793	0.99	65.62	81.76	76	4374934	0.99	65.6	81.9	76	4018	453	290	27739	1863
2022-09-16	IT3905	70922	3842671	3720303	96.82	4411532	65.61	4382587	0.99	65.64	113.25	104	4378419	0.99	65.63	113.35	104	4453	406	351	28945	2041
2022-09-16	IT3911	70922	2500945	2469580	98.75	4411532	65.61	4383401	0.99	65.59	77.58	78	4359237	0.99	65.54	77.98	79	2425	347	289	28131	1305
2022-09-16	IT3912	70922	2323809	2292560	98.66	4411532	65.61	4388480	0.99	65.59	71.82	72	4354122	0.99	65.52	72.34	72	2591	232	276	23052	1388
2022-09-16	IT3913	70922	4820370	4762360	98.8	4411532	65.61	4395765	1	65.62	146.06	149	4387065	0.99	65.6	146.33	149	2490	349	299	15767	1384
2022-09-16	IT3915	70922	1039475	1022921	98.41	4411532	65.61	4372233	0.99	65.57	31.62	31	4313444	0.98	65.47	31.98	31	3935	291	257	39299	2291
2022-09-16	IT3916	70922	2613276	2573956	98.5	4411532	65.61	4387414	0.99	65.61	80.62	80	4365845	0.99	65.56	80.98	80	2744	284	361	24118	1442
2022-09-16	IT3923	70922	1919448	1890175	98.47	4411532	65.61	4370934	0.99	65.59	59.77	59	4344362	0.98	65.54	60.08	59	3368	457	323	40598	1818
2022-09-16	IT3927	70922	2119155	2095442	98.88	4411532	65.61	4397063	1	65.59	65.88	66	4367144	0.99	65.52	66.28	66	2042	205	194	14469	1155
2022-09-16	IT3928	70922	4713215	4630380	98.24	4411532	65.61	4399990	1	65.62	141.49	139	4394124	1	65.61	141.67	139	4273	587	335	11542	2041
2022-09-16	IT3930	70922	1811103	1788431	98.75	4411532	65.61	4358718	0.99	65.58	56.49	57	4330019	0.98	65.52	56.83	57	2140	339	208	52814	1174
2022-09-16	IT3931	70922	2952169	2918363	98.85	4411532	65.61	4379954	0.99	65.6	91.1	92	4363286	0.99	65.56	91.41	92	2222	270	218	31578	1269
2022-09-16	IT3932	70922	2251165	2225579	98.86	4411532	65.61	4342418	0.98	65.59	70.3	70	4310305	0.98	65.55	70.78	70	2335	388	241	69114	1337
2022-09-16	IT3934	70922	3332809	3290435	98.73	4411532	65.61	4387988	0.99	65.6	101.1	73	4373879	0.99	65.58	101.39	73	2618	356	279	23544	1402
2022-09-16	IT3937	70922	4622669	4563348	98.72	4411532	65.61	4390212	1	65.61	140.76	142	4378364	0.99	65.57	141.12	143	2902	402	296	21320	1503
2022-09-16	IT3942	70922	2630370	2589309	98.44	4411532	65.61	4389953	1	65.6	81.27	80	4366741	0.99	65.54	81.67	81	3440	606	364	21579	1736
2022-09-16	IT3943	70922	3104978	3055393	98.4	4411532	65.61	4384131	0.99	65.6	96.01	95	4362445	0.99	65.55	96.46	95	2480	352	232	27401	1349
2022-09-16	IT3944	70922	3295363	3257163	98.84	4411532	65.61	4382087	0.99	65.58	102.19	103	4364861	0.99	65.54	102.56	103	2140	221	220	29445	1155
2022-09-16	IT3945	70922	2585552	2554532	98.8	4411532	65.61	4383462	0.99	65.59	80.1	81	4359933	0.99	65.54	80.5	81	2192	268	337	28070	1233
2022-09-16	IT3947	70922	3703207	3658597	98.8	4411532	65.61	4379563	0.99	65.61	114.11	116	4365360	0.99	65.58	114.46	116	2598	391	300	31969	1429
2022-09-16	IT3950	70922	4554681	4503416	98.87	4411532	65.61	4390128	1	65.61	140.24	143	4374080	0.99	65.58	140.73	143	1936	295	189	21404	1165
2022-09-16	IT3952	70922	3995148	3943618	98.71	4411532	65.61	4385242	0.99	65.61	123.55	126	4370830	0.99	65.58	123.93	126	2601	249	332	26290	1457
2022-09-16	IT3953	70922	4144455	4100427	98.94	4411532	65.61	4359525	0.99	65.62	129.02	129	4347828	0.99	65.59	129.35	129	2457	408	248	52007	1369
2022-09-16	IT3954	70922	1573914	1550073	98.49	4411532	65.61	4375792	0.99	65.6	48.77	47	4341503	0.98	65.53	49.1	47	3453	377	319	35740	1786
2022-09-16	IT3956	70922	4605243	4516663	98.08	4411532	65.61	4370570	0.99	65.65	137.57	140	4364477	0.99	65.64	137.75	140	3365	574	353	40962	1724
2022-09-16	IT3957	70922	2710861	2651918	97.83	4411532	65.61	4392869	1	65.62	82.13	76	4379016	0.99	65.6	82.37	76	4404	398	392	18663	1964
2022-09-16	IT3958	70922	6814900	6699987	98.31	4411532	65.61	4393684	1	65.64	203.12	206	4390634	1	65.63	203.26	206	3119	324	289	17848	1632
2022-09-16	IT3959	70922	4529219	4436328	97.95	4411532	65.61	4393082	1	65.63	132.44	126	4389333	0.99	65.62	132.54	126	4915	560	388	18450	2295
2022-09-16	IT3962	70922	3533227	3461455	97.97	4411532	65.61	4394314	1	65.63	104.53	102	4387349	0.99	65.61	104.68	102	4017	423	367	17218	1942
2022-09-16	IT3963	70922	3786733	3719713	98.23	4411532	65.61	4384665	0.99	65.62	112.67	115	4377244	0.99	65.6	112.85	115	2681	324	309	26867	1503
2022-09-16	IT3966	70922	3200055	3136437	98.01	4411532	65.61	4394400	1	65.62	92.88	89	4388305	0.99	65.61	92.99	89	4480	459	380	17132	1968
2022-09-16	IT3969	70922	3317790	3252335	98.03	4411532	65.61	4401957	1	65.61	97.31	92	4394209	1	65.6	97.47	92	4314	728	406	9575	2209
2022-09-16	IT3972	70922	3626870	3480232	95.96	4411532	65.61	4388074	0.99	65.64	104.84	96	4383523	0.99	65.64	104.93	96	5947	426	439	23458	2557
2022-09-16	IT3973	70922	3270758	3196776	97.74	4411532	65.61	4400650	1	65.63	95.73	94	4394057	1	65.61	95.86	94	4215	378	364	10882	1976
2022-09-16	IT3984	70922	3450217	3404884	98.69	4411532	65.61	4395718	1	65.6	106.59	108	4376623	0.99	65.56	107.02	108	2065	259	169	15814	1175
2022-09-16	IT3985	70922	2409041	2366694	98.24	4411532	65.61	4394959	1	65.61	73.92	73	4371202	0.99	65.55	74.28	73	3015	331	300	16573	1543
2022-09-16	IT3986	70922	2314698	2273454	98.22	4411532	65.61	4392328	1	65.6	70.8	69	4372082	0.99	65.56	71.09	69	3803	596	400	19204	1908
2022-09-16	IT3988	70922	4231467	4181044	98.81	4411532	65.61	4387383	0.99	65.61	130.7	134	4371418	0.99	65.58	131.15	134	2361	376	265	24149	1386
2022-09-16	IT3989	70922	2005576	1974151	98.43	4411532	65.61	4374447	0.99	65.59	62.17	62	4345458	0.99	65.52	62.53	63	2632	343	261	37085	1332
2022-09-16	IT3991	70922	3782615	3713684	98.18	4411532	65.61	4388480	0.99	65.62	112.29	111	4382187	0.99	65.61	112.44	111	3851	601	320	23052	1899
2022-09-16	IT3994	70922	3244080	3194675	98.48	4411532	65.61	4373561	0.99	65.62	99.79	102	4356276	0.99	65.59	100.15	102	2514	335	305	37971	1366
2022-09-16	IT3997	70922	2949344	1839386	62.37	4411532	65.61	4371723	0.99	66.2	52.65	48	4331741	0.98	66.01	53.06	49	136357	1688	2152	39809	35214
2022-09-16	IT4001	70922	1043830	1023929	98.09	4411532	65.61	4354599	0.99	65.55	32.06	32	4291171	0.97	65.46	32.46	32	5053	559	457	56933	2817
2022-09-16	IT4002	70922	2489391	2456580	98.68	4411532	65.61	4394850	1	65.59	76.92	78	4373512	0.99	65.55	77.26	79	2045	236	204	16682	1162
2022-09-16	IT4003	70922	4410834	3190961	72.34	4411532	65.61	4396871	1	65.59	98.75	101	4381444	0.99	65.56	99.07	101	2697	444	310	14661	1308
2022-09-16	IT4004	70922	858580	844078	98.31	4411532	65.61	4375415	0.99	65.57	26.48	25	4323124	0.98	65.5	26.73	26	4246	492	308	36117	2272
2022-09-16	IT4005	70922	4586465	4531430	98.8	4411532	65.61	4396333	1	65.62	141.11	144	4384674	0.99	65.59	141.47	145	2751	396	393	15199	1542
2022-09-16	IT4006	70922	2888197	2846599	98.56	4411532	65.61	4401628	1	65.61	88.47	87	4384840	0.99	65.58	88.77	87	3769	738	371	9904	1840
2022-09-16	IT4007	70922	3259880	3215366	98.63	4411532	65.61	4364154	0.99	65.6	101.28	97	4347426	0.99	65.56	101.64	97	2697	440	266	47378	1403
2022-09-16	IT4008	70922	3735938	3677691	98.44	4411532	65.61	4384506	0.99	65.61	115.17	117	4368485	0.99	65.57	115.56	118	2645	436	360	27026	1386
2022-09-29	IT2755	200922	5579736	5441530	97.52	4411532	65.61	4395381	1	65.6	160.01	158	4380761	0.99	65.57	160.49	159	1480	456	172	16151	794
2022-09-29	IT2786	200922	4357801	4086139	93.77	4411532	65.61	4367534	0.99	65.6	118.9	119	4358974	0.99	65.59	119.11	119	850	331	91	43998	430
2022-09-29	IT2788	200922	1691302	9295	0.55	4411532	65.61	646936	0.15	66.79	1.56	1	55	0	96.36	10	8	0	0	0	3764596	0
2022-09-29	IT2789	200922	3879095	3167064	81.64	4411532	65.61	4381117	0.99	65.61	89.8	89	4022394	0.91	71.26	90.36	90	736	202	92	30415	382
2022-09-29	IT2791	200922	1868546	868703	46.49	4411532	65.61	4405251	1	65.61	23.81	20	3805774	0.86	71.71	24.99	20	1135	209	121	6281	622
2022-09-29	IT2793	200922	4285086	2815410	65.7	4411532	65.61	4395209	1	65.62	84.49	84	4378950	0.99	65.6	84.74	84	975	164	123	16323	505
2022-09-29	IT2794	200922	633270	543536	85.83	4411532	65.61	4387123	0.99	65.59	14.04	14	3606958	0.82	65.7	15.56	15	453	87	45	24409	260
2022-09-29	IT2795	200922	344829	198478	57.56	4411532	65.61	4143246	0.94	65.34	5.01	5	532958	0.12	70.86	9.97	10	88	2	16	268286	47
2022-09-29	IT2796	200922	14076267	5443393	38.67	4411532	65.61	4393805	1	65.61	157.78	160	4381227	0.99	65.58	158.16	160	917	301	102	17727	475
2022-09-29	IT2798	200922	2187123	2085587	95.36	4411532	65.61	4356366	0.99	65.61	58.81	59	4324838	0.98	65.55	59.16	59	874	178	77	55166	461
2022-09-29	IT2800	200922	551011	502390	91.18	4411532	65.61	4334919	0.98	65.53	12.68	12	3355807	0.76	64.98	14.78	14	569	52	35	76613	290
2022-09-29	IT2801	200922	1893542	1814118	95.81	4411532	65.61	4360361	0.99	65.5	52.44	42	4076983	0.92	65.43	55.59	45	1313	188	120	51171	720
2022-09-29	IT2802	200922	3687	3105	84.21	4411532	65.61	95910	0.02	63.48	1.84	2	0	0	0	0	0	0	0	0	4315622	0
2022-09-29	IT2803	200922	5625858	5392476	95.85	4411532	65.61	4390849	1	65.61	159.41	161	4381799	0.99	65.6	159.71	161	991	227	94	20683	526
2022-09-29	IT2804	200922	3220877	1565805	48.61	4411532	65.61	4368395	0.99	65.61	45.09	44	4338916	0.98	65.59	45.31	44	818	192	89	43137	406
2022-09-29	IT2805	200922	2306902	2122178	91.99	4411532	65.61	4401824	1	65.61	56.89	55	4380818	0.99	65.6	57.11	55	564	107	51	9708	294
2022-09-29	IT2806	200922	1185250	214697	18.11	4411532	65.61	4154903	0.94	65.47	6.14	5	966987	0.22	65.14	12.2	11	306	40	35	256629	158
2022-09-29	IT2807	200922	4727140	4598062	97.27	4411532	65.61	4379262	0.99	65.61	137	138	4364760	0.99	65.58	137.4	138	955	324	88	32270	489
2022-09-29	IT2808	200922	10230	4513	44.12	4411532	65.61	362994	0.08	64.87	1.47	1	22	0	59.09	8	8	0	0	0	4048538	0
2022-09-29	IT2810	200922	2199552	2129084	96.8	4411532	65.61	4385146	0.99	65.61	59.84	58	4369089	0.99	65.6	60.02	59	854	178	93	26386	443
2022-09-29	IT2812	200922	883853	837771	94.79	4411532	65.61	4392137	1	65.61	23.45	22	4222557	0.96	65.65	24.05	23	1348	185	157	19395	717
2022-09-29	IT2818	200922	1816342	436394	24.03	4411532	65.61	4261465	0.97	65.48	11.91	8	1885608	0.43	64.52	20.92	15	706	34	29	150067	331
2022-09-29	IT2820	200922	2136565	2043292	95.63	4411532	65.61	4393852	1	65.61	58.11	53	4368655	0.99	65.58	58.38	53	1428	284	171	17680	763
2022-09-29	IT2821	200922	3039617	2969160	97.68	4411532	65.61	4386364	0.99	65.61	90.29	90	4092624	0.93	70.16	90.71	90	782	155	149	25168	410
2022-09-29	IT2824	200922	3353981	2798255	83.43	4411532	65.61	4394383	1	65.6	82.06	83	4367057	0.99	65.55	82.49	83	835	200	133	17149	431
2022-09-29	IT2825	200922	2883326	2656123	92.12	4411532	65.61	4390001	1	65.61	78.45	79	4362318	0.99	65.57	78.87	79	994	296	103	21531	520
2022-09-29	IT2827	200922	3068921	3004972	97.92	4411532	65.61	4384622	0.99	65.61	89.34	90	4365646	0.99	65.57	89.67	90	853	213	93	26910	458
2022-09-29	IT2831	200922	3386124	3318988	98.02	4411532	65.61	4400728	1	65.61	98.72	100	4380502	0.99	65.57	99.12	100	549	84	43	10804	295
2022-09-29	IT2832	200922	1835958	1784790	97.21	4411532	65.61	4395992	1	65.6	52.26	51	4361765	0.99	65.57	52.58	51	1448	274	179	15540	780
2022-09-29	IT2833	200922	17704	9505	53.69	4411532	65.61	647454	0.15	65.24	1.62	2	3	0	66.67	8	8	0	0	0	3764078	0
2022-09-29	IT2835	200922	3105475	3029289	97.55	4411532	65.61	4405223	1	65.62	87.9	88	4388058	0.99	65.6	88.19	88	985	221	152	6309	507
2022-09-29	IT2836	200922	227188	186061	81.9	4411532	65.61	4211000	0.95	65.65	5.17	5	488235	0.11	75.88	10.17	10	81	4	3	200532	42
2022-09-29	IT2837	200922	2077542	1985032	95.55	4411532	65.61	4331959	0.98	65.61	60.95	60	4268871	0.97	65.52	61.69	60	2474	326	216	79573	1354
2022-09-29	IT2839	200922	219796	172075	78.29	4411532	65.61	3977469	0.9	65.37	5.17	4	579851	0.13	69.13	11.6	10	246	50	26	434063	122
2022-09-29	IT2840	200922	534338	86419	16.17	4411532	65.61	3182463	0.72	65.19	2.92	2	65852	0.01	62.33	9.68	9	48	4	1	1229069	17
2022-09-29	IT2842	200922	2262304	2192181	96.9	4411532	65.61	4393013	1	65.61	61.93	61	4374820	0.99	65.59	62.13	62	891	266	113	18519	472
2022-09-29	IT2843	200922	705236	624619	88.57	4411532	65.61	4382278	0.99	65.58	17.9	18	4008434	0.91	65.65	18.83	18	470	55	46	29254	268
2022-09-29	IT2844	200922	31018	25486	82.17	4411532	65.61	1649665	0.37	64.66	1.87	2	915	0	68.31	8.6	8	1	0	0	2761867	0
2022-09-29	IT2845	200922	1684194	890713	52.89	4411532	65.61	4370318	0.99	65.58	25.6	19	3895947	0.88	65.36	27.83	21	726	141	63	41214	376
2022-09-29	IT2846	200922	1208095	1145352	94.81	4411532	65.61	4384277	0.99	65.61	31.4	30	3990684	0.9	70.87	31.82	31	817	109	126	27255	430
2022-09-29	IT2847	200922	542595	511146	94.2	4411532	65.61	4321009	0.98	65.61	13.92	13	3367976	0.76	65.76	15.96	15	1821	120	107	90523	1003
2022-09-29	IT2851	200922	572913	385517	67.29	4411532	65.61	4381651	0.99	65.57	10.05	10	2590013	0.59	65.84	12.77	12	1159	100	82	29881	630
2022-09-29	IT2855	200922	65690	55103	83.88	4411532	65.61	2394391	0.54	65.55	2.28	2	8320	0	70.25	8.96	8	6	0	0	2017141	3
2022-09-29	IT2856	200922	3053072	898108	29.42	4411532	65.61	4357908	0.99	65.61	26.48	25	4214386	0.96	65.55	27.06	25	903	151	67	53624	431
2022-09-29	IT2858	200922	1306967	1278686	97.84	4411532	65.61	4360273	0.99	65.6	38.01	35	4276524	0.97	65.51	38.58	35	775	193	61	51259	389
2022-09-29	IT2859	200922	1637278	1087516	66.42	4411532	65.61	4391724	1	65.6	29.68	28	4302959	0.98	65.57	30.09	28	567	99	41	19808	280
2022-09-29	IT2860	200922	1806375	695009	38.48	4411532	65.61	4374302	0.99	65.57	21.24	21	4062368	0.92	65.63	22.21	21	898	67	80	37230	443
2022-09-29	IT2861	200922	745236	672950	90.3	4411532	65.61	4376771	0.99	65.6	14.69	14	3696904	0.84	65.43	16.23	15	738	59	70	34761	369
2022-09-29	IT2904	200922	260514	236916	90.94	4411532	65.61	4311565	0.98	65.57	6.81	6	1221922	0.28	66.87	11.14	11	217	10	12	99967	121
2022-09-29	IT2905	200922	3373573	3286480	97.42	4411532	65.61	4389522	1	65.62	94.83	95	4377376	0.99	65.6	95.05	95	975	228	128	22010	497
2022-09-29	IT2906	200922	97510	56277	57.71	4411532	65.61	2858253	0.65	65.58	2.38	2	13895	0	66.13	9.11	9	34	0	0	1553279	2
2022-09-29	IT2907	200922	1378353	1315598	95.45	4411532	65.61	4391998	1	65.6	36.72	33	4112933	0.93	69.13	37.41	33	902	157	81	19534	480
2022-09-29	IT2908	200922	134104	75513	56.31	4411532	65.61	2704285	0.61	65.06	3.18	2	119695	0.03	63.71	9.61	9	50	3	6	1707247	21
2022-09-29	IT2909	200922	4043572	3921665	96.99	4411532	65.61	4393647	1	65.6	121.96	58	4285457	0.97	65.53	124.82	60	1415	215	192	17885	743
2022-09-29	IT2910	200922	468464	406618	86.8	4411532	65.61	4356784	0.99	65.57	11.43	11	2956244	0.67	65.51	13.85	13	450	45	40	54748	245
2022-09-29	IT2911	200922	1002900	934937	93.22	4411532	65.61	4388845	0.99	65.59	24.72	24	3953950	0.9	70.79	25.21	25	711	56	61	22687	370
2022-09-29	IT2912	200922	2211380	2128615	96.26	4411532	65.61	4385638	0.99	65.59	61.26	61	4366306	0.99	65.58	61.48	61	554	155	81	25894	307
2022-09-29	IT2913	200922	998988	874177	87.51	4411532	65.61	4374492	0.99	65.6	26.34	26	4239823	0.96	65.5	26.88	26	510	68	72	37040	266
2022-09-29	IT2914	200922	6257903	649440	10.38	4411532	65.61	4357526	0.99	65.56	17.14	15	3267244	0.74	71.32	19.52	17	1126	95	80	54006	512
2022-09-29	IT2915	200922	2910225	2233439	76.74	4411532	65.61	4394331	1	65.59	61.69	62	4371371	0.99	65.55	61.96	62	848	93	96	17201	449
2022-09-29	IT2916	200922	3187057	3104060	97.4	4411532	65.61	4387196	0.99	65.63	89.02	89	4372923	0.99	65.6	89.26	89	971	204	150	24336	507
2022-09-29	IT2918	200922	4272213	3793980	88.81	4411532	65.61	4393127	1	65.62	118.95	116	4383314	0.99	65.62	119.16	116	1000	187	110	18405	521
2022-09-29	IT2919	200922	5808163	5702874	98.19	4411532	65.61	4360293	0.99	65.62	174.33	173	4354964	0.99	65.61	174.52	173	943	272	111	51239	504
2022-09-29	IT2920	200922	2647848	2492028	94.12	4411532	65.61	4396260	1	65.61	73.3	73	4381507	0.99	65.59	73.5	73	584	150	56	15272	318
2022-09-29	IT2921	200922	2458206	2373753	96.56	4411532	65.61	4393726	1	65.62	67.16	63	4378599	0.99	65.61	67.34	63	977	214	89	17806	499
2022-09-29	IT2922	200922	4617621	4484673	97.12	4411532	65.61	4385277	0.99	65.62	136.66	125	4375010	0.99	65.61	136.93	125	988	281	128	26255	503
2022-09-29	IT2923	200922	4080590	3899184	95.55	4411532	65.61	4308796	0.98	65.63	115.88	93	4286064	0.97	65.6	116.44	93	2485	658	228	102736	1371
2022-09-29	IT2924	200922	2101231	2048539	97.49	4411532	65.61	4386902	0.99	65.61	62.06	62	4361070	0.99	65.6	62.35	62	858	215	95	24630	457
2022-09-29	IT2925	200922	3406684	3162141	92.82	4411532	65.61	4390962	1	65.61	87.22	69	4382440	0.99	65.61	87.35	69	928	326	94	20570	496
2022-09-29	IT2926	200922	3767666	3694979	98.07	4411532	65.61	4393717	1	65.62	114.01	113	4379378	0.99	65.59	114.32	113	1017	170	105	17815	511
2022-09-29	IT2927	200922	1478745	1422263	96.18	4411532	65.61	4392402	1	65.61	41.63	32	4313986	0.98	65.61	42.21	32	1428	254	175	19130	767
2022-09-29	IT2940	200922	2725585	2642303	96.94	4411532	65.61	4405227	1	65.6	76.49	76	4385983	0.99	65.58	76.77	76	999	182	111	6305	518
2022-09-29	IT2941	200922	3897661	3827243	98.19	4411532	65.61	4391887	1	65.6	118.58	117	4367628	0.99	65.54	119.16	117	549	123	47	19645	290
2022-09-29	IT2942	200922	2583817	2454739	95	4411532	65.61	4387670	0.99	65.61	70.68	71	4367177	0.99	65.58	70.95	71	1012	196	86	23862	514
2022-09-29	IT2944	200922	458149	430958	94.07	4411532	65.61	4375044	0.99	65.59	12.23	12	3173295	0.72	65.76	14.22	14	589	46	35	36488	311
2022-09-29	IT2945	200922	3081231	2999841	97.36	4411532	65.61	4387916	0.99	65.61	86.57	87	4371822	0.99	65.58	86.85	87	895	286	82	23616	473
2022-09-29	IT2946	200922	172443	160237	92.92	4411532	65.61	4113638	0.93	65.56	4.74	4	436684	0.1	67.49	10.04	10	170	12	7	297894	104
2022-09-29	IT2947	200922	1696327	1607142	94.74	4411532	65.61	4390826	1	65.61	45.37	45	4358548	0.99	65.58	45.62	45	839	189	104	20706	451
2022-09-29	IT2948	200922	3824561	3737013	97.71	4411532	65.61	4386140	0.99	65.6	109.93	111	4373811	0.99	65.58	110.21	111	570	163	98	25392	314
2022-09-29	IT2949	200922	2718185	2645810	97.34	4411532	65.61	4398489	1	65.6	75.02	75	4384215	0.99	65.58	75.22	75	538	94	73	13043	284
2022-09-29	IT2950	200922	3983176	2952463	74.12	4411532	65.61	4392294	1	65.61	90.95	91	4369877	0.99	65.57	91.33	91	561	132	78	19238	296
2022-09-29	IT2951	200922	1343209	1287659	95.86	4411532	65.61	4384252	0.99	65.61	35.03	35	4329349	0.98	65.56	35.34	35	946	91	76	27280	484
2022-09-29	IT2952	200922	3070878	2989229	97.34	4411532	65.61	4391200	1	65.62	85.83	85	4364326	0.99	65.57	86.29	85	988	149	134	20332	510
2022-09-29	IT2953	200922	5809015	5590205	96.23	4411532	65.61	4403133	1	65.61	162.71	160	4393361	1	65.59	163.02	160	1482	380	174	8399	796
2022-09-29	IT2954	200922	6318425	6172764	97.69	4411532	65.61	4404687	1	65.61	181.12	181	4395147	1	65.59	181.47	181	1009	310	108	6845	526
2022-09-29	IT2955	200922	4753501	4612500	97.03	4411532	65.61	4401031	1	65.6	136.13	137	4389383	0.99	65.57	136.45	137	857	161	103	10501	452
2022-09-29	IT2956	200922	122814	119975	97.69	4411532	65.61	4055623	0.92	65.46	3.89	3	187218	0.04	64.8	10.04	10	41	0	10	355909	21
2022-09-29	IT2957	200922	3519666	3205958	91.09	4411532	65.61	4392703	1	65.61	96.5	98	4368371	0.99	65.56	96.96	98	875	265	102	18829	458
2022-09-29	IT2958	200922	499756	468911	93.83	4411532	65.61	4356315	0.99	65.57	12.93	13	3339757	0.76	65.45	14.77	14	566	58	41	55217	287
2022-09-29	IT2959	200922	5929571	5823994	98.22	4411532	65.61	4398567	1	65.61	177.55	180	4386033	0.99	65.58	178.01	180	865	200	118	12965	447
2022-09-29	IT2960	200922	2181498	69455	3.18	4411532	65.61	2252078	0.51	65.15	2.69	2	14770	0	94.54	42.8	11	414	10	1	2159454	71
2022-09-29	IT2961	200922	2273422	923739	40.63	4411532	65.61	4374742	0.99	65.6	24.83	23	4216214	0.96	65.55	25.45	23	1471	156	102	36790	740
2022-09-29	IT2962	200922	3692910	3581012	96.97	4411532	65.61	4385758	0.99	65.61	100.97	101	4376715	0.99	65.59	101.15	101	900	195	131	25774	478
2022-09-29	IT2963	200922	6588880	6084390	92.34	4411532	65.61	4379605	0.99	65.62	184.61	188	4368589	0.99	65.6	185.03	188	911	112	139	31927	474
2022-09-29	IT2964	200922	7776615	7571235	97.36	4411532	65.61	4393459	1	65.62	220.03	222	4388507	0.99	65.61	220.25	222	1050	170	132	18073	529
2022-09-29	IT2965	200922	8421828	8222243	97.63	4411532	65.61	4372819	0.99	65.59	250.12	253	4364565	0.99	65.57	250.55	253	1027	241	95	38713	514
2022-09-29	IT2967	200922	5565092	5030012	90.39	4411532	65.61	4391126	1	65.62	143.31	144	4383560	0.99	65.61	143.52	144	1014	331	94	20406	529
2022-09-29	IT2968	200922	7148143	6994881	97.86	4411532	65.61	4391246	1	65.62	211.77	210	4383824	0.99	65.6	212.1	210	896	307	102	20286	482
2022-09-29	IT3004	200922	797920	772609	96.83	4411532	65.61	4386302	0.99	65.58	23.22	23	4106102	0.93	65.43	24.12	23	1916	209	161	25230	1033
2022-09-29	IT3007	200922	2242310	2181943	97.31	4411532	65.61	4405566	1	65.61	63.77	53	4347920	0.99	66.12	64.11	53	1000	309	93	5966	523
2022-09-29	IT3008	200922	2057201	2001563	97.3	4411532	65.61	4384220	0.99	65.62	60.04	57	4171879	0.95	68.5	60.66	58	911	179	101	27312	468
2022-09-29	IT3010	200922	1373398	1344580	97.9	4411532	65.61	4391902	1	65.59	41.61	42	4289856	0.97	65.43	42.32	42	524	56	65	19630	285
2022-09-29	IT3013	200922	681583	658727	96.65	4411532	65.61	4383309	0.99	65.6	19.49	16	3414166	0.77	66.5	22.72	19	1060	191	107	28223	569
2022-09-29	IT3014	200922	2489489	2440132	98.02	4411532	65.61	4357878	0.99	65.61	75.5	76	4319645	0.98	65.55	76.05	76	872	201	98	53654	467
2022-09-29	IT3015	200922	550377	522625	94.96	4411532	65.61	4380400	0.99	65.57	14.85	14	3272548	0.74	65.69	17.26	16	581	38	33	31132	307
2022-09-29	IT3016	200922	3648215	3548962	97.28	4411532	65.61	4383828	0.99	65.62	100.88	100	4087949	0.93	70.17	101.84	101	875	170	115	27704	452
2022-09-29	IT3025	200922	903725	878849	97.25	4411532	65.61	4384491	0.99	65.6	26.71	25	4249111	0.96	65.55	27.25	25	792	222	88	27041	416
2022-09-29	IT3027	200922	402527	388979	96.63	4411532	65.61	4375494	0.99	65.57	11.74	11	2622515	0.59	71.68	14.06	13	312	55	23	36038	175
2022-09-29	IT3028	200922	1681753	1653593	98.33	4411532	65.61	4384911	0.99	65.61	52.38	53	4291150	0.97	66.02	52.98	53	922	138	121	26621	470
2022-09-29	IT3038	200922	837291	811246	96.89	4411532	65.61	4388325	0.99	65.6	24.42	24	4113607	0.93	65.54	25.31	24	863	122	100	23207	440
2022-09-29	IT3061	200922	1433450	1407525	98.19	4411532	65.61	4390530	1	65.6	44.58	44	4316711	0.98	65.51	45.11	44	846	199	90	21002	441
2022-09-29	IT3062	200922	1710012	1677553	98.1	4411532	65.61	4388665	0.99	65.6	52.96	52	4325264	0.98	65.51	53.51	52	524	68	74	22867	291
2022-09-29	IT3064	200922	1979778	1900822	96.01	4411532	65.61	4393534	1	65.6	59.64	58	4342680	0.98	65.53	60.16	58	961	198	121	17998	502
2022-09-29	IT3065	200922	3132339	3074501	98.15	4411532	65.61	4393134	1	65.6	96.89	97	4364998	0.99	65.55	97.41	97	1419	313	148	18398	770
2022-09-29	IT3072	200922	747232	733286	98.13	4411532	65.61	4368790	0.99	65.59	21.78	21	4085653	0.93	65.58	22.61	22	1292	154	107	42742	680
2022-09-29	IT3075	200922	2821808	2769387	98.14	4411532	65.61	4369159	0.99	65.61	88.39	89	4328406	0.98	65.56	89.07	89	1472	287	157	42373	788
2022-09-29	IT3078	200922	3028060	2978587	98.37	4411532	65.61	4374584	0.99	65.6	95.38	96	4332567	0.98	65.52	96.15	96	1427	287	142	36948	766
2022-09-29	IT3082	200922	2355689	2240077	95.09	4411532	65.61	4387952	0.99	65.6	70.73	70	4344606	0.98	65.53	71.3	71	877	308	117	23580	465
2022-09-29	IT3084	200922	2186209	2145223	98.13	4411532	65.61	4357880	0.99	65.61	68.75	67	4313862	0.98	65.55	69.3	68	892	234	106	53652	467
2022-09-29	IT3089	200922	3751594	3692827	98.43	4411532	65.61	4393509	1	65.62	112.14	109	4379805	0.99	65.6	112.44	110	989	232	114	18023	503
2022-09-29	IT3095	200922	2206767	2159340	97.85	4411532	65.61	4399687	1	65.61	67.91	65	4351852	0.99	65.55	68.48	65	555	118	65	11845	301
2022-09-29	IT3096	200922	1325946	1296911	97.81	4411532	65.61	4378675	0.99	65.6	40.75	40	4304252	0.98	65.5	41.26	40	2134	340	222	32857	1158
2022-09-29	IT3102	200922	1100978	1079769	98.07	4411532	65.61	4378079	0.99	65.6	33.86	32	4166310	0.94	65.64	35.02	33	783	162	101	33453	406
2022-09-29	IT3103	200922	371593	365160	98.27	4411532	65.61	4376619	0.99	65.57	11.43	11	2640497	0.6	65.15	14.06	13	344	36	45	34913	195
2022-09-29	IT3104	200922	2244931	2200867	98.04	4411532	65.61	4398171	1	65.6	69.71	69	4345532	0.99	65.55	70.37	70	1423	330	178	13361	779
2022-09-29	IT3108	200922	3344674	3291291	98.4	4411532	65.61	4397006	1	65.6	104.22	105	4361312	0.99	65.53	104.93	105	1489	410	153	14526	800
2022-09-29	IT3114	200922	1434863	1407858	98.12	4411532	65.61	4381199	0.99	65.62	44.71	44	4311164	0.98	65.53	45.23	44	934	149	121	30333	475
2022-09-29	IT3116	200922	1928602	1885271	97.75	4411532	65.61	4401414	1	65.61	59.32	58	4334017	0.98	65.55	60.01	58	1459	270	145	10118	785
2022-09-29	IT3118	200922	2567635	2461489	95.87	4411532	65.61	4394379	1	65.6	78.02	77	4357132	0.99	65.54	78.54	77	541	96	67	17153	288
2022-09-29	IT3124	200922	2235551	2200646	98.44	4411532	65.61	4390108	1	65.61	68.9	67	4362355	0.99	65.59	69.24	67	889	299	112	21424	478
2022-09-29	IT3127	200922	4141892	3979829	96.09	4411532	65.61	4363066	0.99	65.59	120.74	122	4337414	0.98	65.54	121.36	122	2346	394	248	48466	1252
2022-09-29	IT3129	200922	6485655	6358847	98.04	4411532	65.61	4326756	0.98	65.62	198.47	201	4276863	0.97	65.61	200.7	202	2527	660	232	84776	1394
2022-09-29	IT3130	200922	2262058	2221890	98.22	4411532	65.61	4400360	1	65.6	68.83	66	4343849	0.98	65.5	69.52	66	1423	363	161	11172	763
2022-09-29	IT3214	200922	1386163	1334998	96.31	4411532	65.61	4326641	0.98	65.63	36.12	34	4258803	0.97	65.6	36.56	35	2431	331	201	84891	1339
2022-09-29	IT3218	200922	1857985	1809531	97.39	4411532	65.61	4390952	1	65.62	56.94	44	4141483	0.94	65.72	59.73	47	921	183	141	20580	486
2022-09-29	IT3219	200922	3195688	3124035	97.76	4411532	65.61	4395989	1	65.62	97.98	94	4368134	0.99	65.6	98.49	94	968	232	125	15543	496
2022-09-29	IT3220	200922	1751371	5299	0.3	4411532	65.61	193723	0.04	67.28	1.99	1	0	0	0	0	0	0	0	4	4217809	0
2022-09-29	IT3223	200922	301556	226302	75.04	4411532	65.61	4271562	0.97	65.59	6.45	6	1103046	0.25	66.88	10.82	10	185	13	26	139970	92
2022-09-29	IT3225	200922	826374	776912	94.01	4411532	65.61	4390014	1	65.6	20.18	20	4155190	0.94	65.63	20.86	20	808	87	72	21518	420
2022-09-29	IT3227	200922	436214	263919	60.5	4411532	65.61	4324864	0.98	65.57	7.12	7	1400516	0.32	66.48	11.12	11	254	22	10	86668	143
2022-09-29	IT3228	200922	2028164	1671189	82.4	4411532	65.61	4356020	0.99	65.6	52.43	50	4303320	0.98	65.53	52.94	51	876	178	97	55512	464
2022-09-29	IT3261	200922	2216124	2168765	97.86	4411532	65.61	4384903	0.99	65.61	67.9	66	4324759	0.98	65.51	68.68	66	931	159	119	26629	481
2022-09-29	IT3394	200922	2139236	2101575	98.24	4411532	65.61	4358010	0.99	65.58	65.43	65	4300558	0.97	65.5	66.15	65	2242	366	231	53522	1231
2022-09-29	IT3412	200922	964328	930581	96.5	4411532	65.61	4403181	1	65.6	27.59	27	4293968	0.97	65.55	28.04	27	838	63	98	8351	445
2022-09-29	IT3414	200922	829003	795412	95.95	4411532	65.61	4373752	0.99	65.59	22.54	22	4143870	0.94	65.45	23.34	22	1329	190	104	37780	702
2022-09-29	IT3416	200922	1042273	975304	93.57	4411532	65.61	4360285	0.99	65.61	26.16	26	4073677	0.92	68.43	26.68	26	783	197	88	51247	422
2022-09-29	IT3420	200922	1038503	1002598	96.54	4411532	65.61	4380979	0.99	65.59	29.84	29	4271777	0.97	65.51	30.34	30	794	103	131	30553	417
2022-09-29	IT3575	200922	715977	700397	97.82	4411532	65.61	4374904	0.99	65.58	20.38	20	3980587	0.9	65.51	21.5	21	826	69	93	36628	436
2022-09-29	IT3576	200922	4699274	4603056	97.95	4411532	65.61	4337663	0.98	65.63	143.9	143	4289041	0.97	65.6	145.41	144	2495	488	245	73869	1358
2022-09-29	IT3577	200922	323105	316664	98.01	4411532	65.61	4375337	0.99	65.56	9.7	9	2128598	0.48	66.36	12.68	12	398	60	67	36195	206
2022-09-29	IT3578	200922	2358783	2323995	98.53	4411532	65.61	4383710	0.99	65.61	72.95	72	4336639	0.98	65.53	73.59	73	969	163	122	27822	496
2022-09-29	IT3660	200922	260373	248025	95.26	4411532	65.61	4296977	0.97	65.62	6.88	6	1101528	0.25	68.33	11.96	11	210	17	29	114555	119
2022-09-29	IT3661	200922	900922	787435	87.4	4411532	65.61	4382769	0.99	65.58	23.19	23	4116096	0.93	65.74	24.18	24	822	160	86	28763	417
2022-09-29	IT3662	200922	332280	268778	80.89	4411532	65.61	4354329	0.99	65.56	7.97	8	1458127	0.33	66.72	11.67	11	264	5	17	57203	150
2022-09-29	IT3663	200922	5090487	5031328	98.84	4411532	65.61	4359488	0.99	65.62	160.13	158	4287191	0.97	65.67	162.65	160	909	288	123	52044	480
2022-09-29	IT3664	200922	1244	810	65.11	4411532	65.61	72393	0.02	66.02	1.06	1	0	0	0	0	0	0	0	0	4339139	0
2022-09-29	IT3665	200922	2063801	2023230	98.03	4411532	65.61	4382970	0.99	65.61	63.44	63	4330636	0.98	65.53	64.05	63	735	202	125	28562	384
2022-09-29	IT3666	200922	2021233	1981865	98.05	4411532	65.61	4397149	1	65.61	61.54	62	4330583	0.98	65.49	62.3	63	924	183	133	14383	476
2022-09-29	IT3667	200922	895591	874885	97.69	4411532	65.61	4391382	1	65.6	26.57	26	4200021	0.95	65.61	27.35	27	793	134	94	20150	434
2022-09-29	IT3668	200922	1684228	1652454	98.11	4411532	65.61	4391651	1	65.6	51.6	52	4329477	0.98	65.54	52.17	52	1466	197	216	19881	790
2022-09-29	IT3669	200922	1265113	1233217	97.48	4411532	65.61	4361183	0.99	65.6	37.98	38	4270995	0.97	65.56	38.57	38	782	145	96	50349	390
2022-09-29	IT3670	200922	2423049	2378375	98.16	4411532	65.61	4395805	1	65.6	74.66	75	4358613	0.99	65.53	75.19	76	560	178	73	15727	309
2022-09-29	IT3674	200922	2305347	2231461	96.8	4411532	65.61	4395913	1	65.59	68.85	69	4330969	0.98	65.45	69.73	69	536	168	69	15619	289
2022-09-29	IT3682	200922	687408	653858	95.12	4411532	65.61	4373626	0.99	65.57	20.91	21	4066883	0.92	65.5	21.75	21	486	87	31	37906	269
2022-09-29	IT3708	200922	2220663	2173468	97.87	4411532	65.61	4390570	1	65.61	68.82	66	4309480	0.98	65.6	69.9	67	857	217	106	20962	455
2022-09-29	IT3709	200922	2267110	2225210	98.15	4411532	65.61	4397858	1	65.6	70.2	71	4349631	0.99	65.53	70.84	71	538	141	55	13674	288
2022-09-29	IT3710	200922	5015696	4842157	96.54	4411532	65.61	4405152	1	65.61	153.45	158	4381522	0.99	65.55	154.19	158	555	138	64	6380	297
2022-09-29	IT3718	200922	4952649	4864790	98.23	4411532	65.61	4368363	0.99	65.6	150.46	154	4345082	0.98	65.55	151.19	154	828	335	123	43169	416
2022-09-29	IT3719	200922	4112255	4046494	98.4	4411532	65.61	4401001	1	65.61	124.43	128	4365506	0.99	65.55	125.35	128	521	258	51	10531	274
2022-09-29	IT3720	200922	4074849	3994725	98.03	4411532	65.61	4394312	1	65.61	123.56	117	4361543	0.99	65.56	124.38	118	969	163	117	17220	503
2022-09-29	IT3722	200922	4630764	4542977	98.1	4411532	65.61	4379430	0.99	65.61	138.71	132	4356951	0.99	65.58	139.35	133	944	263	102	32102	491
2022-09-29	IT3731	200922	3997276	3927182	98.25	4411532	65.61	4390593	1	65.62	120.6	106	4362089	0.99	65.58	121.29	106	977	176	133	20939	510
2022-09-29	IT3732	200922	3704488	3645115	98.4	4411532	65.61	4395575	1	65.59	113.96	116	4361704	0.99	65.52	114.74	116	1009	219	105	15957	525
2022-09-29	IT3736	200922	795797	780966	98.14	4411532	65.61	4382534	0.99	65.58	24.77	24	4147478	0.94	65.46	25.61	25	1327	240	146	28998	706
2022-09-29	IT3737	200922	4312018	4232081	98.15	4411532	65.61	4380975	0.99	65.61	133.57	128	4356057	0.99	65.57	134.22	128	1487	258	154	30557	793
2022-09-29	IT3738	200922	7104664	6987142	98.35	4411532	65.61	4392756	1	65.62	224.53	229	4363042	0.99	65.54	225.92	229	989	174	136	18776	507
2022-09-29	IT3739	200922	4056847	3982177	98.16	4411532	65.61	4358512	0.99	65.62	126.83	124	4328995	0.98	65.56	127.57	124	913	222	108	53020	467
2022-09-29	IT3740	200922	2741940	2694932	98.29	4411532	65.61	4383100	0.99	65.6	86.3	86	4324362	0.98	65.48	87.3	86	867	259	85	28432	453
2022-09-29	IT3741	200922	6058879	5927494	97.83	4411532	65.61	4398703	1	65.6	187.06	176	4374873	0.99	65.55	187.94	177	2150	423	231	12829	1164
2022-09-29	IT3742	200922	2470178	2431975	98.45	4411532	65.61	4359628	0.99	65.6	78.08	79	4297432	0.97	65.49	79.01	79	796	163	104	51904	405
2022-09-29	IT3743	200922	2338768	2305353	98.57	4411532	65.61	4395086	1	65.59	73.63	73	4323892	0.98	65.45	74.63	74	539	140	40	16446	283
2022-09-29	IT3744	200922	3185590	3141279	98.61	4411532	65.61	4391617	1	65.6	98.25	93	4361586	0.99	65.54	98.83	93	559	164	54	19915	285
2022-09-29	IT3745	200922	4986417	4910624	98.48	4411532	65.61	4388129	0.99	65.6	154.91	155	4361252	0.99	65.54	155.73	155	1465	339	190	23403	792
2022-09-29	IT3746	200922	5902706	5799180	98.25	4411532	65.61	4396945	1	65.61	182.56	178	4379787	0.99	65.57	183.17	178	1439	433	192	14587	772
2022-09-29	IT3747	200922	8172601	8056218	98.58	4411532	65.61	4365268	0.99	65.61	255.83	260	4343739	0.98	65.56	257	261	930	311	102	46264	493
2022-09-29	IT3748	200922	4500987	4438399	98.61	4411532	65.61	4398866	1	65.61	141.21	142	4357615	0.99	65.51	142.39	143	1442	282	174	12666	765
2022-09-29	IT3749	200922	3881956	3815901	98.3	4411532	65.61	4386588	0.99	65.61	121.36	123	4338256	0.98	65.51	122.53	124	953	188	136	24944	482
2022-09-29	IT3750	200922	3310694	3258891	98.44	4411532	65.61	4386257	0.99	65.61	103.3	103	4335330	0.98	65.5	104.34	103	953	132	96	25275	482
2022-09-29	IT3752	200922	2034211	1994385	98.04	4411532	65.61	4394999	1	65.6	62.67	60	4340705	0.98	65.52	63.26	60	1418	261	166	16533	752
2022-09-29	IT3754	200922	3591486	3533522	98.39	4411532	65.61	4356964	0.99	65.61	113.41	113	4316607	0.98	65.54	114.33	113	865	205	108	54568	449
2022-09-29	IT3755	200922	1286740	1260381	97.95	4411532	65.61	4386241	0.99	65.6	39.9	39	4277718	0.97	65.48	40.61	39	933	245	103	25291	488
2022-09-29	IT3756	200922	4864099	4778390	98.24	4411532	65.61	4383688	0.99	65.61	152.8	156	4343032	0.98	65.51	154.08	156	972	223	131	27844	492
2022-09-29	IT3757	200922	1784081	1742419	97.66	4411532	65.61	4386500	0.99	65.61	55.2	54	4305029	0.98	65.49	56	55	944	101	108	25032	482
2022-09-29	IT3758	200922	2365669	2328102	98.41	4411532	65.61	4380598	0.99	65.6	74.1	74	4318327	0.98	65.48	74.97	74	850	163	84	30934	436
2022-09-29	IT3759	200922	4222280	4146875	98.21	4411532	65.61	4390223	1	65.61	131.63	121	4362762	0.99	65.56	132.34	121	914	170	98	21309	492
2022-09-29	IT3761	200922	2371210	2314379	97.6	4411532	65.61	4397477	1	65.6	72.81	72	4332613	0.98	65.51	73.65	72	2117	412	208	14055	1143
2022-09-29	IT3762	200922	6275308	6179259	98.47	4411532	65.61	4392130	1	65.61	189.25	193	4371356	0.99	65.56	190.06	193	1475	362	159	19402	793
2022-09-29	IT3776	200922	1934928	1897374	98.06	4411532	65.61	4386619	0.99	65.6	59.48	52	4316338	0.98	65.52	60.2	52	816	122	85	24913	427
2022-09-29	IT3777	200922	2658772	2611419	98.22	4411532	65.61	4395682	1	65.61	82.77	83	4330707	0.98	65.49	83.79	84	545	184	73	15850	310
2022-09-29	IT3778	200922	1507675	1482206	98.31	4411532	65.61	4376320	0.99	65.57	46.99	47	4246855	0.96	65.38	48.04	47	831	165	93	35212	428
2022-09-29	IT3794	200922	1968082	1939731	98.56	4411532	65.61	4375532	0.99	65.6	60.58	59	4281918	0.97	65.46	61.6	60	1415	255	143	36000	762
2022-09-29	IT3805	200922	2366450	2306435	97.46	4411532	65.61	4395976	1	65.59	71.41	73	4330567	0.98	65.51	72.3	73	2099	426	221	15556	1139
2022-09-29	IT3839	200922	3736412	3669004	98.2	4411532	65.61	4397059	1	65.6	115.44	114	4353323	0.99	65.51	116.43	115	2130	365	215	14473	1142
2022-09-29	IT3841	200922	1092046	1068208	97.82	4411532	65.61	4382860	0.99	65.6	33.5	32	4239076	0.96	65.46	34.25	32	893	78	116	28672	462
2022-09-29	IT3842	200922	2755446	2708596	98.3	4411532	65.61	4394417	1	65.6	86.35	86	4339311	0.98	65.49	87.25	87	962	147	84	17115	494
2022-09-29	IT3846	200922	4145777	4035537	97.34	4411532	65.61	4399048	1	65.6	127.13	123	4364587	0.99	65.54	127.97	123	2160	404	217	12484	1166
2022-09-29	IT3847	200922	2199234	2161021	98.26	4411532	65.61	4389797	1	65.6	65.74	66	4321223	0.98	65.48	66.6	66	965	209	131	21735	494
2022-09-29	IT3848	200922	1954332	1916305	98.05	4411532	65.61	4386313	0.99	65.59	59.96	54	4330392	0.98	65.53	60.54	54	824	143	120	25219	427
2022-09-29	IT3850	200922	5546187	5421391	97.75	4411532	65.61	4393718	1	65.62	172.41	167	4375469	0.99	65.59	173.02	167	987	183	111	17814	501
2022-09-29	IT3854	200922	5180146	5095658	98.37	4411532	65.61	4397009	1	65.61	162.08	160	4368103	0.99	65.54	163.03	160	554	251	51	14523	307
2022-09-29	IT3856	200922	3109470	3047241	98	4411532	65.61	4391989	1	65.62	97.09	92	4345013	0.98	65.53	97.97	92	967	197	102	19543	493
2022-09-29	IT3858	200922	1941286	1897568	97.75	4411532	65.61	4384195	0.99	65.62	59.65	53	4326468	0.98	65.55	60.23	53	954	111	107	27337	485
2022-09-29	IT3859	200922	3904777	3827743	98.03	4411532	65.61	4390766	1	65.61	121.7	117	4346276	0.99	65.55	122.77	117	972	261	104	20766	510
2022-09-29	IT3860	200922	5578737	5489725	98.4	4411532	65.61	4395691	1	65.61	172.7	172	4368847	0.99	65.55	173.65	173	569	156	63	15841	324
2022-09-29	IT3886	200922	2172504	2120112	97.59	4411532	65.61	4389609	1	65.62	67.38	65	4331939	0.98	65.53	68.08	65	950	148	91	21923	493
2022-09-29	IT3888	200922	1721696	1681053	97.64	4411532	65.61	4382668	0.99	65.6	53.59	53	4301721	0.98	65.48	54.38	53	854	282	113	28864	458
2022-09-29	IT3892	200922	438005	426353	97.34	4411532	65.61	4371520	0.99	65.56	13.07	12	2841846	0.64	65.32	15.77	14	1379	189	90	40012	728
2022-09-29	IT3897	200922	2728072	2667312	97.77	4411532	65.61	4381739	0.99	65.62	83.68	76	4343775	0.98	65.57	84.26	76	948	175	130	29793	500
2022-09-29	IT3901	200922	7047466	6931603	98.36	4411532	65.61	4389504	1	65.62	222.36	226	4361140	0.99	65.55	223.7	227	941	178	113	22028	483
2022-09-29	IT3903	200922	1774327	1742058	98.18	4411532	65.61	4397127	1	65.6	54.86	52	4320421	0.98	65.51	55.57	52	566	61	52	14405	301
2022-09-29	IT3965	200922	1199230	1125664	93.87	4411532	65.61	4372979	0.99	65.61	34.78	31	4270583	0.97	65.57	35.32	31	1386	200	132	38553	747
2022-09-29	IT3968	200922	1470227	1432920	97.46	4411532	65.61	4397516	1	65.61	43.38	34	4291218	0.97	65.57	44.16	35	860	164	107	14016	440
2022-10-07	IT2972	41022	5437026	5311177	97.69	4411532	65.61	4393646	1	65.6	152.56	156	4370053	0.99	65.58	153.33	156	909	136	83	17886	478
2022-10-07	IT2987	41022	346617	322821	93.13	4411532	65.61	4315737	0.98	65.59	8.28	7	1480734	0.34	66.86	14.08	12	459	54	32	95795	238
2022-10-07	IT2990	41022	888343	859552	96.76	4411532	65.61	4388431	0.99	65.6	24.2	23	4166965	0.94	65.61	24.95	23	812	174	97	23101	435
2022-10-07	IT2993	41022	201052	189064	94.04	4411532	65.61	4129972	0.94	65.52	5.03	4	545701	0.12	66.08	10.79	10	109	4	2	281560	52
2022-10-07	IT2994	41022	4388928	4287758	97.69	4411532	65.61	4395092	1	65.6	126.27	127	4371620	0.99	65.55	126.86	127	995	167	131	16440	501
2022-10-07	IT3005	41022	5248166	5140605	97.95	4411532	65.61	4385479	0.99	65.62	154.31	157	4365943	0.99	65.57	154.92	157	985	160	114	26053	501
2022-10-07	IT3018	41022	3988313	3890464	97.55	4411532	65.61	4389500	1	65.61	113.76	115	4367487	0.99	65.57	114.26	115	984	267	114	22032	515
2022-10-07	IT3019	41022	5716180	5609885	98.14	4411532	65.61	4399933	1	65.61	168.52	172	4381650	0.99	65.56	169.15	172	1455	369	163	11599	789
2022-10-07	IT3032	41022	3662423	3574654	97.6	4411532	65.61	4393057	1	65.62	105.61	103	4369317	0.99	65.57	106.1	104	975	142	114	18475	503
2022-10-07	IT3041	41022	5157169	5056439	98.05	4411532	65.61	4396328	1	65.6	153.39	154	4370618	0.99	65.54	154.19	154	1454	415	170	15204	785
2022-10-07	IT3042	41022	3339188	3279390	98.21	4411532	65.61	4376995	0.99	65.6	100.24	100	4335280	0.98	65.51	101.07	100	948	205	113	34537	498
2022-10-07	IT3043	41022	3347995	3275067	97.82	4411532	65.61	4382135	0.99	65.62	97.05	99	4349205	0.99	65.55	97.67	99	956	147	127	29397	492
2022-10-07	IT3047	41022	2007878	1967087	97.97	4411532	65.61	4390484	1	65.61	58.16	59	4332977	0.98	65.52	58.75	59	939	199	94	21048	479
2022-10-07	IT3048	41022	2984111	2929778	98.18	4411532	65.61	4394860	1	65.6	88.74	90	4353411	0.99	65.52	89.45	90	1435	301	142	16672	783
2022-10-07	IT3050	41022	4123603	4055161	98.34	4411532	65.61	4384042	0.99	65.6	122.32	123	4353802	0.99	65.53	123.07	123	587	140	81	27490	314
2022-10-07	IT3055	41022	860804	836753	97.21	4411532	65.61	4391581	1	65.61	24.8	24	4176438	0.95	65.59	25.54	24	881	125	79	19951	436
2022-10-07	IT3067	41022	737007	718914	97.55	4411532	65.61	4384841	0.99	65.59	21.51	21	4049226	0.92	65.54	22.47	22	1270	200	126	26691	679
2022-10-07	IT3085	41022	966173	941941	97.49	4411532	65.61	4388866	0.99	65.61	28.47	28	4244317	0.96	65.55	29.06	28	906	172	96	22666	463
2022-10-07	IT3086	41022	2306260	2256557	97.84	4411532	65.61	4386857	0.99	65.6	69.1	68	4349336	0.99	65.57	69.57	68	571	118	77	24675	309
2022-10-07	IT3088	41022	508095	497086	97.83	4411532	65.61	4382125	0.99	65.59	14.94	14	3509143	0.8	65.88	16.49	16	768	50	108	29407	402
2022-10-07	IT3089	41022	554500	522962	94.31	4411532	65.61	4376712	0.99	65.61	15.57	15	3604204	0.82	65.73	17.11	16	783	95	56	34820	394
2022-10-07	IT3308	41022	3845662	3519894	91.53	4411532	65.61	4362849	0.99	65.61	98.83	100	4341908	0.98	65.56	99.25	100	818	206	83	48683	414
2022-10-07	IT3318	41022	708914	643220	90.73	4411532	65.61	4390431	1	65.59	18.33	18	4003872	0.91	65.64	19.31	19	475	42	59	21101	247
2022-10-07	IT3321	41022	2234124	2184592	97.78	4411532	65.61	4383135	0.99	65.6	66.53	66	4315779	0.98	65.48	67.37	67	878	357	85	28397	459
2022-10-07	IT3323	41022	2973065	2899864	97.54	4411532	65.61	4404392	1	65.6	84.63	86	4366259	0.99	65.52	85.25	86	543	134	44	7140	297
2022-10-07	IT3335	41022	2957835	2888903	97.67	4411532	65.61	4358326	0.99	65.61	84.13	85	4319973	0.98	65.52	84.76	86	875	205	108	53206	464
2022-10-07	IT3344	41022	2333517	2275963	97.53	4411532	65.61	4396240	1	65.6	65.83	66	4362894	0.99	65.54	66.23	66	959	248	115	15292	493
2022-10-07	IT3521	41022	4199089	4104322	97.74	4411532	65.61	4354398	0.99	65.58	123.21	127	4322128	0.98	65.51	124.02	127	2277	368	229	57134	1211
2022-10-07	IT3579	41022	3574287	70380	1.97	4411532	65.61	228082	0.05	40.11	5.24	1	44	0	27.27	85.55	43	0	0	13	4183450	0
2022-10-07	IT3581	41022	1390154	1363118	98.06	4411532	65.61	4387327	0.99	65.61	41.89	35	4154028	0.94	65.66	43.64	37	888	159	98	24205	445
2022-10-07	IT3583	41022	2886831	2175175	75.35	4411532	65.61	4390778	1	65.61	55.13	55	4362006	0.99	65.58	55.41	55	1403	247	153	20754	757
2022-10-07	IT3585	41022	2320371	2281679	98.33	4411532	65.61	4392275	1	65.61	70.92	68	4336918	0.98	65.53	71.63	68	942	153	115	19257	490
2022-10-07	IT3586	41022	3501724	3430664	97.97	4411532	65.61	4390545	1	65.61	107.11	105	4359733	0.99	65.56	107.74	105	870	220	115	20987	455
2022-10-07	IT3588	41022	2100958	2048212	97.49	4411532	65.61	4399344	1	65.61	62.53	48	4355077	0.99	65.6	63	48	356	83	53	12188	188
2022-10-07	IT3589	41022	2815795	58061	2.06	4411532	65.61	1065593	0.24	64.84	3.42	2	33	0	60.61	99.06	90	0	0	43	3345939	0
2022-10-07	IT3591-2	41022	2685347	2640393	98.33	4411532	65.61	4392980	1	65.6	79.2	80	4344750	0.98	65.51	79.93	81	567	92	51	18552	304
2022-10-07	IT3591	41022	1429264	1406527	98.41	4411532	65.61	4364236	0.99	65.6	44.3	43	4262369	0.97	65.51	45.04	44	797	93	97	47296	419
2022-10-07	IT3592-2	41022	3277968	3211213	97.96	4411532	65.61	4387415	0.99	65.6	97.13	97	4351831	0.99	65.53	97.8	97	969	174	121	24117	495
2022-10-07	IT3592	41022	1892577	1867037	98.65	4411532	65.61	4394996	1	65.61	57.35	50	4354951	0.99	65.58	57.73	50	575	144	77	16536	314
2022-10-07	IT3593	41022	2190918	2153480	98.29	4411532	65.61	4402521	1	65.61	66.47	65	4349482	0.99	65.54	67.07	65	1471	279	175	9011	787
2022-10-07	IT3594	41022	1704082	1673592	98.21	4411532	65.61	4388660	0.99	65.61	51.93	49	4324887	0.98	65.55	52.47	50	563	169	63	22872	298
2022-10-07	IT3596	41022	2578884	2533265	98.23	4411532	65.61	4390481	1	65.62	78.6	76	4349869	0.99	65.57	79.18	76	974	158	115	21051	515
2022-10-07	IT3597	41022	1253093	1225785	97.82	4411532	65.61	4393994	1	65.62	37.37	35	4311010	0.98	65.6	37.84	35	928	204	86	17538	482
2022-10-07	IT3598	41022	2497744	2406204	96.34	4411532	65.61	4401214	1	65.61	73.93	70	4363063	0.99	65.57	74.42	70	878	171	101	10318	467
2022-10-07	IT3600	41022	4152105	4071084	98.05	4411532	65.61	4395985	1	65.6	124.43	127	4360736	0.99	65.52	125.31	127	971	185	134	15547	493
2022-10-07	IT3601	41022	1627599	711924	43.74	4411532	65.61	4356773	0.99	65.59	20.98	20	3903818	0.88	65.67	22.21	21	869	113	88	54759	356
2022-10-07	IT3602	41022	1446836	1418083	98.01	4411532	65.61	4360078	0.99	65.59	43.86	44	4229181	0.96	65.67	44.92	44	2262	375	256	51454	1211
2022-10-07	IT3603	41022	3970009	3893653	98.08	4411532	65.61	4403126	1	65.6	115.58	117	4371795	0.99	65.53	116.3	117	576	229	56	8406	317
2022-10-07	IT3604	41022	2136716	2099572	98.26	4411532	65.61	4378100	0.99	65.6	65.68	66	4318996	0.98	65.52	66.39	66	1436	230	148	33432	762
2022-10-07	IT3606	41022	1173949	1154110	98.31	4411532	65.61	4394400	1	65.59	35.17	32	4279928	0.97	65.6	35.79	32	531	175	46	17132	287
2022-10-07	IT3607	41022	2836332	2788377	98.31	4411532	65.61	4390139	1	65.61	86.81	79	4350559	0.99	65.56	87.44	79	972	216	122	21393	492
2022-10-07	IT3608	41022	1509661	1473408	97.6	4411532	65.61	4363873	0.99	65.6	45.39	39	4285095	0.97	65.56	45.98	39	804	210	75	47659	407
2022-10-07	IT3609	41022	1206562	1186770	98.36	4411532	65.61	4365388	0.99	65.56	37.15	37	4196176	0.95	65.39	38.28	38	2040	259	194	46144	1129
2022-10-07	IT3610	41022	1814786	1787323	98.49	4411532	65.61	4375563	0.99	65.6	55.5	56	4300507	0.97	65.47	56.27	56	1403	315	169	35969	763
2022-10-07	IT3611	41022	1957577	1917882	97.97	4411532	65.61	4395181	1	65.62	58.58	55	4356510	0.99	65.57	58.96	55	954	181	133	16351	492
2022-10-07	IT3612	41022	1372659	1139389	83.01	4411532	65.61	4391611	1	65.6	33.36	33	4310173	0.98	65.56	33.78	33	934	162	111	19921	511
2022-10-07	IT3613	41022	1096809	1078355	98.32	4411532	65.61	4390644	1	65.61	33.4	30	4266319	0.97	65.57	34.02	31	500	63	68	20888	268
2022-10-07	IT3614	41022	2424960	2390717	98.59	4411532	65.61	4393447	1	65.6	74.49	75	4343991	0.98	65.51	75.19	75	615	116	36	18085	330
2022-10-07	IT3615	41022	4117300	146949	3.57	4411532	65.61	3496335	0.79	64.86	3.77	3	16384	0	5.96	66.67	38	475	5	55	915197	266
2022-10-07	IT3616	41022	1141373	1122316	98.33	4411532	65.61	4399072	1	65.6	34.59	32	4264935	0.97	65.55	35.32	32	565	110	42	12460	302
2022-10-07	IT3617	41022	802041	785177	97.9	4411532	65.61	4386802	0.99	65.57	24.01	24	4153795	0.94	65.5	24.84	24	549	78	63	24730	301
2022-10-07	IT3618	41022	572765	559100	97.61	4411532	65.61	4378985	0.99	65.56	17.38	17	3839003	0.87	65.63	18.52	18	707	103	72	32547	379
2022-10-07	IT3619	41022	1844350	1812351	98.27	4411532	65.61	4389404	0.99	65.6	56.43	56	4328833	0.98	65.5	57.04	56	834	225	114	22128	445
2022-10-07	IT3620	41022	989271	966928	97.74	4411532	65.61	4387325	0.99	65.59	29.83	29	4241865	0.96	65.51	30.47	30	507	74	37	24207	268
2022-10-07	IT3621	41022	514515	502211	97.61	4411532	65.61	4386167	0.99	65.58	15.34	15	3589329	0.81	65.79	16.82	16	678	108	46	25365	366
2022-10-07	IT3622	41022	650187	636904	97.96	4411532	65.61	4389882	1	65.6	19.62	19	3970629	0.9	65.74	20.65	19	465	50	59	21650	254
2022-10-07	IT3623	41022	877644	860272	98.02	4411532	65.61	4374316	0.99	65.59	26.66	26	4200413	0.95	65.47	27.36	27	1373	200	121	37216	729
2022-10-07	IT3624	41022	595608	582526	97.8	4411532	65.61	4380105	0.99	65.6	18.15	18	3853269	0.87	65.68	19.31	18	818	79	80	31427	416
2022-10-07	IT3625	41022	1129470	1093476	96.81	4411532	65.61	4385272	0.99	65.59	34.01	33	4252035	0.96	65.46	34.73	33	496	53	78	26260	279
2022-10-07	IT3626	41022	4421156	4326913	97.87	4411532	65.61	4357173	0.99	65.6	135.82	112	4303136	0.98	65.48	137.38	113	876	207	106	54359	457
2022-10-07	IT3627	41022	3304399	3236692	97.95	4411532	65.61	4404741	1	65.6	96.87	99	4371494	0.99	65.53	97.5	99	880	175	83	6791	460
2022-10-07	IT3628	41022	3091899	3025772	97.86	4411532	65.61	4384667	0.99	65.58	89.33	91	4345059	0.98	65.5	90.04	91	1024	153	97	26865	526
2022-10-07	IT3629	41022	3054849	2998258	98.15	4411532	65.61	4398146	1	65.61	89.92	90	4368504	0.99	65.55	90.43	91	327	119	39	13386	181
2022-10-07	IT3630	41022	2815518	2749217	97.65	4411532	65.61	4363475	0.99	65.59	83.45	84	4314468	0.98	65.49	84.25	84	805	174	113	48057	404
2022-10-07	IT3631	41022	2906497	2850765	98.08	4411532	65.61	4393511	1	65.62	86.72	83	4362772	0.99	65.57	87.2	83	957	243	143	18021	501
2022-10-07	IT3632	41022	2727146	2657845	97.46	4411532	65.61	4386040	0.99	65.62	76.87	75	4362457	0.99	65.58	77.21	75	1000	184	128	25492	521
2022-10-07	IT3633	41022	3585377	3509798	97.89	4411532	65.61	4380187	0.99	65.6	107.51	98	4337102	0.98	65.51	108.45	99	740	98	97	31345	378
2022-10-07	IT3634	41022	4465265	4382530	98.15	4411532	65.61	4395985	1	65.61	132.06	132	4378943	0.99	65.57	132.5	132	585	138	62	15547	307
2022-10-07	IT3635	41022	3810520	3740831	98.17	4411532	65.61	4398789	1	65.6	112.29	114	4374535	0.99	65.54	112.83	114	552	136	50	12743	294
2022-10-07	IT3636	41022	1717336	1678596	97.74	4411532	65.61	4384319	0.99	65.59	50.64	51	4302731	0.98	65.47	51.37	51	924	112	107	27213	471
2022-10-07	IT3637	41022	1069548	1045818	97.78	4411532	65.61	4394019	1	65.59	30.72	31	4235920	0.96	65.46	31.48	31	911	162	119	17513	455
2022-10-07	IT3638	41022	5567452	5461515	98.1	4411532	65.61	4395347	1	65.59	166.81	172	4366771	0.99	65.52	167.8	172	997	233	118	16185	517
2022-10-07	IT3639	41022	1327988	1299819	97.88	4411532	65.61	4386823	0.99	65.6	37.65	37	4301199	0.97	65.49	38.18	38	929	137	91	24709	484
2022-10-07	IT3640	41022	3365206	3293123	97.86	4411532	65.61	4391348	1	65.62	99.12	99	4353464	0.99	65.54	99.86	99	966	209	102	20184	501
2022-10-07	IT3641	41022	3652995	3581664	98.05	4411532	65.61	4401993	1	65.6	108.23	108	4365650	0.99	65.52	109	109	970	276	113	9539	505
2022-10-07	IT3642	41022	2571254	2510919	97.65	4411532	65.61	4383847	0.99	65.59	73.52	57	4348434	0.99	65.56	73.99	57	560	127	62	27685	317
2022-10-07	IT3643	41022	2315040	2262696	97.74	4411532	65.61	4395950	1	65.59	67.78	67	4344573	0.98	65.51	68.41	67	2125	372	231	15582	1142
2022-10-07	IT3644	41022	3004716	2940874	97.88	4411532	65.61	4385321	0.99	65.61	87	88	4349189	0.99	65.54	87.61	88	970	184	96	26211	501
2022-10-07	IT3645	41022	2071437	2035708	98.28	4411532	65.61	4362799	0.99	65.6	61.04	61	4316222	0.98	65.53	61.57	61	793	270	75	48733	403
2022-10-07	IT3646	41022	722579	703085	97.3	4411532	65.61	4379817	0.99	65.56	19.7	19	4023095	0.91	65.57	20.67	20	484	44	64	31715	249
2022-10-07	IT3647	41022	4725742	4645643	98.31	4411532	65.61	4391052	1	65.62	143.45	149	4360704	0.99	65.57	144.35	149	978	196	100	20480	504
2022-10-07	IT3648	41022	2055121	2011703	97.89	4411532	65.61	4392908	1	65.6	59.76	60	4339717	0.98	65.51	60.34	60	1429	222	172	18624	759
2022-10-07	IT3649	41022	1514903	1474305	97.32	4411532	65.61	4397898	1	65.6	41.78	42	4320508	0.98	65.48	42.35	42	1403	249	149	13634	753
2022-10-07	IT3650	41022	2176622	2137075	98.18	4411532	65.61	4362993	0.99	65.6	63.67	64	4326656	0.98	65.56	64.09	64	831	256	112	48539	417
2022-10-07	IT3651	41022	3840314	3759924	97.91	4411532	65.61	4377543	0.99	65.6	114.52	117	4342412	0.98	65.52	115.33	117	1469	295	170	33989	792
2022-10-07	IT3652	41022	2510558	2463800	98.14	4411532	65.61	4387793	0.99	65.6	74.93	76	4347918	0.99	65.52	75.49	76	774	198	71	23739	417
2022-10-07	IT3653	41022	4775152	4664541	97.68	4411532	65.61	4402834	1	65.61	130.2	128	4390568	1	65.59	130.51	128	2223	408	196	8698	1205
2022-10-07	IT3654	41022	2480128	2409906	97.17	4411532	65.61	4404032	1	65.61	69.33	69	4375939	0.99	65.56	69.69	69	1462	360	155	7500	795
2022-10-07	IT3655	41022	2941878	2774590	94.31	4411532	65.61	4397348	1	65.61	81.91	83	4370544	0.99	65.57	82.32	83	551	193	74	14184	295
2022-10-07	IT3656	41022	2846860	2797405	98.26	4411532	65.61	4397418	1	65.6	83.84	84	4367904	0.99	65.55	84.3	84	545	177	41	14114	295
2022-10-07	IT3657	41022	3253518	3185926	97.92	4411532	65.61	4386817	0.99	65.62	96.8	98	4341178	0.98	65.52	97.68	98	920	175	87	24715	473
2022-10-07	IT3658	41022	1442514	1399610	97.03	4411532	65.61	4382790	0.99	65.62	38.3	38	4314244	0.98	65.57	38.72	38	934	176	108	28742	490
2022-10-07	IT3659	41022	2892872	2816813	97.37	4411532	65.61	4369818	0.99	65.61	75.58	71	4339778	0.98	65.59	76.02	71	916	272	69	41714	466
2022-10-07	IT3721	41022	6465493	6346695	98.16	4411532	65.61	4397439	1	65.62	193.29	199	4369862	0.99	65.57	194.43	199	978	170	125	14093	507
2022-10-07	IT3723	41022	2635390	2550880	96.79	4411532	65.61	4388870	0.99	65.59	79.56	80	4327599	0.98	65.47	80.5	80	1414	323	157	22662	758
2022-10-07	IT3724	41022	2389021	2350058	98.37	4411532	65.61	4387851	0.99	65.58	73.21	74	4320317	0.98	65.46	74.15	74	850	138	93	23681	450
2022-10-07	IT3725	41022	2561370	2520926	98.42	4411532	65.61	4385791	0.99	65.6	79.23	80	4320625	0.98	65.48	80.22	81	936	146	92	25741	484
2022-10-07	IT3727	41022	3467688	3403893	98.16	4411532	65.61	4397426	1	65.61	102.98	103	4363638	0.99	65.62	103.6	103	1425	243	136	14106	760
2022-10-07	IT3728	41022	3761440	3680330	97.84	4411532	65.61	4394350	1	65.61	110	113	4364983	0.99	65.54	110.63	113	941	152	129	17182	480
2022-10-07	IT3729	41022	1611712	1586604	98.44	4411532	65.61	4387755	0.99	65.58	49.28	49	4292503	0.97	65.44	50.1	50	826	123	108	23777	429
2022-10-07	IT3730	41022	1372575	1345011	97.99	4411532	65.61	4379380	0.99	65.58	41.67	42	4258675	0.97	65.4	42.55	42	536	68	61	32152	293
2022-10-07	IT3763	41022	1610978	1579823	98.07	4411532	65.61	4396991	1	65.61	48.78	47	4307221	0.98	65.5	49.55	48	916	135	111	14541	473
2022-10-07	IT3764	41022	1720799	1687262	98.05	4411532	65.61	4383037	0.99	65.59	52.36	52	4277748	0.97	65.48	53.35	52	857	179	73	28495	464
2022-10-07	IT3765	41022	1834232	1780747	97.08	4411532	65.61	4389607	1	65.59	55.28	55	4300392	0.97	65.44	56.18	55	822	122	113	21925	440
2022-10-07	IT3766	41022	2278253	2229712	97.87	4411532	65.61	4394349	1	65.58	69.37	66	4311619	0.98	65.45	70.44	67	2063	318	192	17183	1108
2022-10-07	IT3767	41022	4124412	4058464	98.4	4411532	65.61	4397513	1	65.61	124.9	122	4368967	0.99	65.56	125.6	122	1418	289	174	14019	754
2022-10-07	IT3768	41022	364970	355934	97.52	4411532	65.61	4378393	0.99	65.57	10.64	10	2099008	0.48	65.58	14.46	13	1052	105	80	33139	560
2022-10-07	IT3769	41022	2591757	2552667	98.49	4411532	65.61	4351306	0.99	65.61	80.57	78	4288389	0.97	65.52	81.54	79	859	206	109	60226	442
2022-10-07	IT3770	41022	1146988	1127462	98.3	4411532	65.61	4387184	0.99	65.6	34.6	32	4235603	0.96	65.5	35.46	32	851	108	107	24348	440
2022-10-07	IT3771	41022	4399171	4330712	98.44	4411532	65.61	4385127	0.99	65.61	135.46	136	4349875	0.99	65.53	136.43	136	948	229	123	26405	488
2022-10-07	IT3773	41022	1568369	1536671	97.98	4411532	65.61	4373093	0.99	65.61	47.24	44	4281512	0.97	65.52	47.96	45	2060	336	216	38439	1133
2022-10-07	IT3774	41022	1888160	1855986	98.3	4411532	65.61	4389828	1	65.6	57.27	51	4311835	0.98	65.53	58.06	51	547	89	61	21704	292
2022-10-07	IT3775	41022	3895894	3816689	97.97	4411532	65.61	4378177	0.99	65.59	119.77	120	4325797	0.98	65.49	121.04	120	829	232	94	33355	429
2022-10-07	IT3781	41022	2179517	2135696	97.99	4411532	65.61	4383529	0.99	65.57	66.86	67	4289864	0.97	65.48	68.03	68	1032	154	87	28003	519
2022-10-07	IT3782	41022	2580892	2545117	98.61	4411532	65.61	4376100	0.99	65.6	79.77	78	4301045	0.97	65.48	80.91	78	522	80	53	35432	306
2022-10-07	IT3783	41022	5884313	5797039	98.52	4411532	65.61	4386756	0.99	65.61	176.96	181	4356404	0.99	65.53	178.08	182	1447	325	159	24776	769
2022-10-07	IT3785	41022	2425766	2380018	98.11	4411532	65.61	4388073	0.99	65.61	74.2	67	4318884	0.98	65.53	75.13	68	939	160	131	23459	488
2022-10-07	IT3786	41022	1850541	1821568	98.43	4411532	65.61	4381804	0.99	65.59	57.09	56	4298925	0.97	65.48	57.93	56	522	96	64	29728	282
2022-10-07	IT3787	41022	2563976	2522742	98.39	4411532	65.61	4397494	1	65.59	78.79	79	4315588	0.98	65.48	80.01	80	326	77	18	14038	171
2022-10-07	IT3788	41022	2308982	2274202	98.49	4411532	65.61	4379705	0.99	65.58	72.12	72	4284615	0.97	65.42	73.4	72	599	84	77	31827	330
2022-10-07	IT3789	41022	945499	931062	98.47	4411532	65.61	4346932	0.99	65.57	29.3	29	4108016	0.93	65.44	30.4	30	801	131	98	64600	411
2022-10-07	IT3795	41022	2413295	1108333	45.93	4411532	65.61	4393349	1	65.6	31.49	29	4256044	0.96	65.54	32.19	30	598	98	46	18183	298
2022-10-07	IT3808	41022	2327203	2282902	98.1	4411532	65.61	4387326	0.99	65.6	71.31	68	4313338	0.98	65.48	72.28	68	880	156	100	24206	445
2022-10-07	IT3826	41022	2838573	2791599	98.35	4411532	65.61	4392579	1	65.6	79.47	80	4344858	0.98	65.51	80.22	80	553	74	48	18953	292
2022-10-07	IT3827	41022	3577274	3526905	98.59	4411532	65.61	4358555	0.99	65.61	109.63	111	4300252	0.97	65.49	110.93	112	863	238	101	52977	454
2022-10-07	IT3828	41022	3176928	3123857	98.33	4411532	65.61	4381976	0.99	65.61	95.51	95	4330497	0.98	65.51	96.47	96	937	135	101	29556	474
2022-10-07	IT3829	41022	3116325	3030272	97.24	4411532	65.61	4334182	0.98	65.61	89.55	85	4278253	0.97	65.55	90.58	86	2424	329	192	77350	1307
2022-10-07	IT3830	41022	3573205	3518164	98.46	4411532	65.61	4400115	1	65.61	108.01	109	4353738	0.99	65.51	109.01	109	564	84	66	11417	297
2022-10-07	IT3831	41022	3270627	3218710	98.41	4411532	65.61	4395665	1	65.61	96.13	94	4367364	0.99	65.56	96.65	94	860	144	100	15867	449
2022-10-07	IT3832	41022	5500402	5422286	98.58	4411532	65.61	4400325	1	65.61	163.65	166	4377898	0.99	65.56	164.41	166	1457	320	158	11207	782
2022-10-07	IT3835	41022	5627474	5538278	98.41	4411532	65.61	4385857	0.99	65.6	171.23	176	4349279	0.99	65.51	172.55	176	1009	177	141	25675	494
2022-10-07	IT3836	41022	6374452	6274969	98.44	4411532	65.61	4393795	1	65.62	192.59	199	4364722	0.99	65.54	193.76	199	964	206	113	17737	480
2022-10-07	IT3838	41022	5547075	5453920	98.32	4411532	65.61	4400528	1	65.61	165.35	167	4376299	0.99	65.55	166.17	167	1402	369	196	11004	748
2022-10-07	IT3843	41022	3790621	3699590	97.6	4411532	65.61	4378808	0.99	65.61	111.92	111	4346629	0.99	65.55	112.63	112	1407	375	150	32724	736
2022-10-07	IT3845	41022	3577555	3512336	98.18	4411532	65.61	4392609	1	65.61	107.52	108	4345977	0.99	65.52	108.51	108	943	219	99	18923	482
2022-10-07	IT3849	41022	3383583	3318761	98.08	4411532	65.61	4391629	1	65.59	101	102	4336714	0.98	65.48	102.11	102	1407	223	169	19903	742
2022-10-07	IT3851	41022	4311905	4246354	98.48	4411532	65.61	4381006	0.99	65.6	130.82	134	4332148	0.98	65.5	132.14	135	955	140	134	30526	478
2022-10-07	IT3853	41022	5723092	5630651	98.38	4411532	65.61	4383026	0.99	65.6	174.58	176	4349868	0.99	65.52	175.8	176	916	218	117	28506	490
2022-10-07	IT3855	41022	3997319	3923828	98.16	4411532	65.61	4396872	1	65.6	119.13	119	4358653	0.99	65.52	120.03	119	1438	321	137	14660	772
2022-10-07	IT3857	41022	5980478	5880490	98.33	4411532	65.61	4387216	0.99	65.6	179.91	184	4363819	0.99	65.55	180.79	184	569	280	50	24316	314
2022-10-07	IT3861	41022	3032596	2955389	97.45	4411532	65.61	4357055	0.99	65.59	88.52	90	4313890	0.98	65.5	89.28	90	2237	431	224	54477	1213
2022-10-07	IT3880	41022	2603125	2558842	98.3	4411532	65.61	4392834	1	65.6	78.27	76	4338428	0.98	65.52	79.07	76	1003	255	98	18698	504
2022-10-07	IT3889	41022	6482387	1755330	27.08	4411532	65.61	4385285	0.99	65.57	53.63	54	4298334	0.97	65.43	54.5	55	525	122	55	26247	280
2022-10-07	IT3898	41022	7573574	7460199	98.5	4411532	65.61	4385056	0.99	65.61	230.55	237	4358161	0.99	65.54	231.88	237	867	136	105	26476	456
2022-10-07	IT3900	41022	6063798	5934550	97.87	4411532	65.61	4393873	1	65.6	180.53	179	4364144	0.99	65.52	181.66	179	2167	377	211	17659	1160
2022-10-07	IT3904	41022	6008100	5926167	98.64	4411532	65.61	4393489	1	65.6	183.68	190	4361688	0.99	65.52	184.91	190	605	138	65	18043	322
2022-10-07	IT3910	41022	5078015	5002145	98.51	4411532	65.61	4386589	0.99	65.6	154.05	158	4352686	0.99	65.52	155.13	159	595	136	83	24943	335
2022-10-07	IT3917	41022	1473767	1442967	97.91	4411532	65.61	4358610	0.99	65.61	44.27	39	4257977	0.97	65.53	45	39	829	195	85	52922	432
2022-10-07	IT3918	41022	2003767	1961461	97.89	4411532	65.61	4387750	0.99	65.61	59.98	53	4323800	0.98	65.55	60.65	53	913	135	114	23782	469
2022-10-07	IT3919	41022	1702534	1669414	98.05	4411532	65.61	4377751	0.99	65.61	51.88	48	4290388	0.97	65.52	52.67	49	916	114	125	33781	474
2022-10-07	IT3920	41022	1409456	1380999	97.98	4411532	65.61	4395467	1	65.61	42.39	39	4312953	0.98	65.56	42.93	39	2084	378	212	16065	1109
2022-10-07	IT3921	41022	1154716	1131071	97.95	4411532	65.61	4391486	1	65.62	34.18	31	4280865	0.97	65.63	34.75	31	931	159	123	20046	463
2022-10-07	IT3924	41022	2821895	2775223	98.35	4411532	65.61	4356495	0.99	65.61	87.2	82	4305065	0.98	65.54	88.06	83	879	194	112	55037	466
2022-10-07	IT3933	41022	1662279	1626665	97.86	4411532	65.61	4402252	1	65.61	49.67	44	4316926	0.98	65.54	50.39	44	1408	220	166	9280	766
2022-10-07	IT3935	41022	2398437	2365645	98.63	4411532	65.61	4396199	1	65.6	72.93	67	4362289	0.99	65.58	73.36	67	751	163	106	15333	394
2022-10-07	IT3936	41022	2771294	2732223	98.59	4411532	65.61	4390561	1	65.62	85.43	80	4350657	0.99	65.57	86.05	80	945	171	116	20971	483
2022-10-07	IT3938	41022	3000045	2951030	98.37	4411532	65.61	4402503	1	65.62	88.87	82	4380489	0.99	65.6	89.2	82	1458	315	174	9029	782
2022-10-07	IT3940	41022	1154324	1127258	97.66	4411532	65.61	4387112	0.99	65.6	34.26	31	4235691	0.96	65.54	35.08	31	737	135	75	24420	395
2022-10-07	IT3941	41022	3161155	3095629	97.93	4411532	65.61	4362865	0.99	65.58	96.83	95	4307393	0.98	65.49	97.88	95	2274	410	203	48667	1216
2022-10-07	IT3946	41022	34905	27912	79.97	4411532	65.61	1826667	0.41	65.16	1.91	1	13983	0	64.69	12.84	12	6	0	0	2584865	2
2022-10-07	IT3948	41022	1992003	1951293	97.96	4411532	65.61	4391372	1	65.61	60.19	54	4319872	0.98	65.53	60.95	55	1434	234	184	20160	771
2022-10-07	IT3951	41022	958642	943460	98.42	4411532	65.61	4357522	0.99	65.59	29.19	27	4117279	0.93	65.49	30.25	28	726	138	102	54010	359
2022-10-07	IT3961	41022	4600579	4520996	98.27	4411532	65.61	4388483	0.99	65.61	140.86	143	4342005	0.98	65.52	142.19	143	943	168	128	23049	487
2022-10-07	IT3970	41022	1374145	1346750	98.01	4411532	65.61	4371426	0.99	65.6	41.4	38	4240362	0.96	65.52	42.35	38	883	116	85	40106	452
2022-10-07	IT3974	41022	2105945	2070519	98.32	4411532	65.61	4374987	0.99	65.6	64.66	62	4304709	0.98	65.48	65.5	62	1427	273	180	36545	763
2022-10-07	IT3975	41022	3510693	3451191	98.31	4411532	65.61	4381782	0.99	65.61	108.23	108	4333110	0.98	65.52	109.26	108	974	112	109	29750	489
2022-10-07	IT3976	41022	1936435	1899950	98.12	4411532	65.61	4390968	1	65.6	59.2	57	4313601	0.98	65.5	60.01	57	1391	294	166	20564	748
2022-10-07	IT3977	41022	2611925	2569647	98.38	4411532	65.61	4356126	0.99	65.61	79.93	76	4310930	0.98	65.55	80.63	76	876	207	91	55406	462
2022-10-07	IT3978	41022	1399770	1364480	97.48	4411532	65.61	4377459	0.99	65.59	41.27	40	4272914	0.97	65.48	42	40	2064	295	196	34073	1114
2022-10-07	IT3979	41022	1241031	1218317	98.17	4411532	65.61	4378583	0.99	65.58	37.76	36	4215405	0.96	65.47	38.74	36	781	133	75	32949	410
2022-10-07	IT3980	41022	1975650	1941424	98.27	4411532	65.61	4391804	1	65.59	60.37	59	4295670	0.97	65.43	61.43	60	333	79	26	19728	187
2022-10-07	IT3981	41022	2613923	2568656	98.27	4411532	65.61	4390291	1	65.6	79.77	79	4324632	0.98	65.49	80.74	79	507	114	37	21241	282
2022-10-07	IT3982	41022	3481886	3415654	98.1	4411532	65.61	4381560	0.99	65.61	106.43	102	4329469	0.98	65.53	107.5	103	967	139	116	29972	488
2022-10-07	IT3983	41022	4388314	4313202	98.29	4411532	65.61	4397734	1	65.6	132.98	132	4354898	0.99	65.5	134.13	133	554	156	58	13798	292
2022-10-07	IT3990	41022	7146773	7036046	98.45	4411532	65.61	4368057	0.99	65.6	218.83	224	4342212	0.98	65.54	220.03	224	807	297	94	43475	416
2022-10-07	IT3995	41022	1339220	1226809	91.61	4411532	65.61	4357187	0.99	65.59	37.56	36	4209688	0.95	65.47	38.46	36	741	99	83	54345	369
2022-10-07	IT3996	41022	2484445	2433370	97.94	4411532	65.61	4360665	0.99	65.59	75.96	75	4284873	0.97	65.46	77.06	75	797	189	79	50867	391
2022-10-07	IT3999	41022	2401605	2363071	98.4	4411532	65.61	4340318	0.98	65.6	74.79	73	4262164	0.97	65.48	75.92	73	869	232	87	71214	460
2022-10-07	IT4000	41022	2325554	2266150	97.45	4411532	65.61	4390889	1	65.61	69.22	64	4338061	0.98	65.55	69.9	65	982	213	96	20643	515
2022-10-07	IT4019	41022	7892498	7765788	98.39	4411532	65.61	4394249	1	65.6	235.18	242	4374665	0.99	65.55	236.16	242	591	147	60	17283	313
2022-10-07	IT4020	41022	7162568	7042749	98.33	4411532	65.61	4396656	1	65.6	213.76	221	4373903	0.99	65.54	214.78	221	861	210	104	14876	449
2022-10-10	IT1000	50419	4075425	3858404	94.67	4411532	65.61	4376060	0.99	65.61	104.19	104	4361091	0.99	65.57	104.51	104	1472	434	123	35472	791
2022-10-10	IT1001	310519	6593481	6541414	99.21	4411532	65.61	4378512	0.99	65.61	180.72	181	4368450	0.99	65.58	181.12	181	901	311	104	33020	486
2022-10-10	IT1002	50419	2980556	2958538	99.26	4411532	65.61	4375140	0.99	65.58	91	92	4329950	0.98	65.48	91.86	93	788	251	94	36392	394
2022-10-10	IT1003	310519	1710862	1666989	97.44	4411532	65.61	4382220	0.99	65.6	50.86	50	4341638	0.98	65.53	51.26	50	902	146	89	29312	473
2022-10-10	IT1005	50319	3079424	3054834	99.2	4411532	65.61	4395537	1	65.58	86.52	87	4357152	0.99	65.49	87.21	88	580	144	56	15995	329
2022-10-10	IT1006	50319	2993635	2973199	99.32	4411532	65.61	4348358	0.99	65.59	89.25	90	4301018	0.97	65.47	90.14	91	857	192	103	63174	447
2022-10-10	IT1007	50319	3539053	3509723	99.17	4411532	65.61	4389655	1	65.61	96.66	98	4362005	0.99	65.54	97.22	98	955	191	124	21877	490
2022-10-10	IT1008	50419	2271978	2258793	99.42	4411532	65.61	4386041	0.99	65.59	69.23	70	4333981	0.98	65.48	69.96	70	535	71	40	25491	275
2022-10-10	IT1010	50319	2685511	2661708	99.11	4411532	65.61	4394088	1	65.58	79.5	80	4331560	0.98	65.43	80.52	81	915	251	101	17444	471
2022-10-10	IT1011	50419	3189353	3162920	99.17	4411532	65.61	4390673	1	65.61	92.64	93	4360992	0.99	65.54	93.2	94	974	138	109	20859	501
2022-10-10	IT1012	50419	2722270	2703346	99.3	4411532	65.61	4391966	1	65.58	82.58	84	4342753	0.98	65.47	83.42	84	806	117	80	19566	417
2022-10-10	IT1013	50319	2846181	2826764	99.32	4411532	65.61	4352145	0.99	65.59	83.35	84	4303737	0.98	65.46	84.2	84	859	181	107	59387	443
2022-10-10	IT1015	50419	3579842	3543689	98.99	4411532	65.61	4393103	1	65.6	99.11	100	4373803	0.99	65.56	99.5	100	1490	322	167	18429	804
2022-10-10	IT1017	50319	2960395	2938564	99.26	4411532	65.61	4393455	1	65.6	84.24	86	4349830	0.99	65.49	85	86	499	116	43	18077	272
2022-10-10	IT1018	50419	2110683	2096715	99.34	4411532	65.61	4378902	0.99	65.57	64.97	66	4310831	0.98	65.44	65.85	66	548	163	80	32630	306
2022-10-10	IT1019	50419	2850244	2828921	99.25	4411532	65.61	4385014	0.99	65.58	81	82	4354907	0.99	65.51	81.5	83	533	106	90	26518	297
2022-10-10	IT1020	50319	2075378	2059355	99.23	4411532	65.61	4382380	0.99	65.59	60.23	61	4320169	0.98	65.45	60.98	61	851	280	85	29152	447
2022-10-10	IT1021	50319	2451257	2427389	99.03	4411532	65.61	4384289	0.99	65.59	72.62	74	4323029	0.98	65.46	73.54	74	924	151	87	27243	468
2022-10-10	IT1022	50419	2636374	2617525	99.29	4411532	65.61	4377132	0.99	65.58	80.5	81	4321262	0.98	65.46	81.43	81	830	218	117	34400	437
2022-10-10	IT1024	50419	2071448	2055903	99.25	4411532	65.61	4386316	0.99	65.59	62.84	63	4316138	0.98	65.47	63.71	64	901	273	81	25216	455
2022-10-10	IT1025	50419	2865943	2842203	99.17	4411532	65.61	4383577	0.99	65.59	85.9	88	4336083	0.98	65.49	86.74	88	1009	205	125	27955	500
2022-10-10	IT1026	310519	3034731	3014093	99.32	4411532	65.61	4394405	1	65.6	96.6	98	4355736	0.99	65.5	97.36	98	576	130	89	17127	315
2022-10-10	IT1027	50319	2933328	2904352	99.01	4411532	65.61	4391708	1	65.59	86.23	88	4342295	0.98	65.48	87.12	88	963	220	127	19824	492
2022-10-10	IT1028	50419	2146503	2128719	99.17	4411532	65.61	4370384	0.99	65.61	64.72	65	4309467	0.98	65.48	65.52	66	925	189	130	41148	479
2022-10-10	IT1029	240419	3794707	3760463	99.1	4411532	65.61	4382409	0.99	65.6	109.54	111	4353910	0.99	65.53	110.2	111	951	161	113	29123	482
2022-10-10	IT1030	50319	3223715	3192867	99.04	4411532	65.61	4374711	0.99	65.6	90.99	92	4336420	0.98	65.5	91.72	93	968	154	141	36821	501
2022-10-10	IT1031	50319	2557864	2539735	99.29	4411532	65.61	4373896	0.99	65.59	74.82	76	4321131	0.98	65.47	75.63	76	864	266	107	37636	462
2022-10-10	IT1032	50419	2253602	2236632	99.25	4411532	65.61	4390861	1	65.58	66.54	67	4337125	0.98	65.47	67.26	68	802	127	91	20671	424
2022-10-10	IT1033	240419	4536215	4480735	98.78	4411532	65.61	4383814	0.99	65.6	124.68	127	4359698	0.99	65.53	125.32	127	959	222	126	27718	486
2022-10-10	IT1034	50419	2533801	2511876	99.13	4411532	65.61	4400939	1	65.6	75.14	76	4357933	0.99	65.5	75.8	76	1416	320	155	10593	759
2022-10-10	IT1035	50419	2532055	2513741	99.28	4411532	65.61	4395590	1	65.58	76.63	78	4349670	0.99	65.48	77.34	78	824	219	94	15942	437
2022-10-10	IT1036	50419	3004979	2988589	99.45	4411532	65.61	4356579	0.99	65.59	94.12	96	4309445	0.98	65.48	95.06	96	786	199	95	54953	399
2022-10-10	IT1039	50419	2080663	2065244	99.26	4411532	65.61	4372683	0.99	65.57	61.71	62	4315693	0.98	65.47	62.41	63	920	144	92	38849	477
2022-10-10	IT1040	50419	2212733	2196560	99.27	4411532	65.61	4384069	0.99	65.61	66.82	68	4323148	0.98	65.47	67.63	68	940	149	116	27463	484
2022-10-10	IT1041	50419	2643650	2630463	99.5	4411532	65.61	4356091	0.99	65.58	82.2	83	4302865	0.98	65.45	83.12	84	793	211	83	55441	402
2022-10-10	IT1042	240419	3722649	3680029	98.86	4411532	65.61	4386839	0.99	65.6	104.22	107	4355740	0.99	65.51	104.91	107	878	228	98	24693	470
2022-10-10	IT1043	50419	2896954	2876929	99.31	4411532	65.61	4356844	0.99	65.59	91.04	92	4306457	0.98	65.47	92	93	788	193	97	54688	399
2022-10-10	IT1044	50419	2112648	2100452	99.42	4411532	65.61	4379692	0.99	65.57	64.62	65	4323516	0.98	65.45	65.34	65	530	148	41	31840	293
2022-10-10	IT1045	50419	3906809	3860757	98.82	4411532	65.61	4395621	1	65.6	106.61	108	4374051	0.99	65.55	107.09	108	1423	303	149	15911	757
2022-10-10	IT1046	240419	3933218	3878332	98.6	4411532	65.61	4367088	0.99	65.58	110.01	113	4341819	0.98	65.52	110.6	113	2214	445	236	44444	1199
2022-10-10	IT1047	50419	3064039	3037137	99.12	4411532	65.61	4381658	0.99	65.6	92.92	95	4338179	0.98	65.5	93.77	95	932	133	133	29874	492
2022-10-10	IT1048	50419	2532002	2513322	99.26	4411532	65.61	4386470	0.99	65.6	77.93	79	4332049	0.98	65.49	78.8	79	934	160	190	25062	478
2022-10-10	IT1049	50419	2751517	2732294	99.3	4411532	65.61	4373084	0.99	65.59	83.42	85	4323219	0.98	65.49	84.27	85	1425	255	157	38448	764
2022-10-10	IT1050	140519	3557591	3538295	99.46	4411532	65.61	4346931	0.99	65.6	107.83	110	4307308	0.98	65.49	108.74	110	866	253	136	64601	459
2022-10-10	IT1051	140519	3591324	3547322	98.77	4411532	65.61	4402674	1	65.59	107.2	108	4378554	0.99	65.53	107.73	108	990	232	117	8858	507
2022-10-10	IT1052	310519	3480833	3453640	99.22	4411532	65.61	4384448	0.99	65.59	109.69	112	4336928	0.98	65.49	110.8	112	949	214	166	27084	481
2022-10-10	IT1054	310519	2281076	2258121	98.99	4411532	65.61	4370429	0.99	65.58	70.81	72	4286259	0.97	65.43	72.06	72	2069	328	249	41103	1132
2022-10-10	IT1055	140519	3278935	3255766	99.29	4411532	65.61	4380991	0.99	65.59	99.51	101	4339816	0.98	65.48	100.37	101	903	228	107	30541	484
2022-10-10	IT1056	310519	3396326	3356619	98.83	4411532	65.61	4385288	0.99	65.59	103.49	105	4346309	0.99	65.5	104.35	106	547	150	72	26244	303
2022-10-10	IT1057	240419	4351963	4310268	99.04	4411532	65.61	4381332	0.99	65.59	125.3	127	4359594	0.99	65.53	125.88	127	560	86	44	30200	295
2022-10-10	IT1058	50419	2335183	2313488	99.07	4411532	65.61	4369238	0.99	65.58	72.62	73	4296121	0.97	65.41	73.7	74	2047	357	221	42294	1115
2022-10-10	IT1059	50419	3278961	3247366	99.04	4411532	65.61	4398109	1	65.61	95.85	96	4375736	0.99	65.56	96.28	96	984	202	119	13423	516
2022-10-10	IT1061	220121	3213470	3173939	98.77	4411532	65.61	4357558	0.99	65.61	96.29	98	4331712	0.98	65.53	96.81	98	872	171	117	53974	468
2022-10-10	IT1062	50419	2792819	2773277	99.3	4411532	65.61	4388131	0.99	65.58	87.96	89	4330273	0.98	65.45	89.01	90	540	119	96	23401	280
2022-10-10	IT1063	50419	2329253	2314391	99.36	4411532	65.61	4378665	0.99	65.57	73.79	75	4299058	0.97	65.39	74.99	75	516	95	65	32867	269
2022-10-10	IT1064	50419	3715242	3650475	98.26	4411532	65.61	4392667	1	65.61	91.19	91	4374262	0.99	65.56	91.53	92	1465	294	133	18865	787
2022-10-10	IT1065	240419	3931682	3886668	98.86	4411532	65.61	4385250	0.99	65.61	108.67	111	4360030	0.99	65.54	109.25	111	983	170	121	26282	507
2022-10-10	IT1066	240419	1696447	1680010	99.03	4411532	65.61	4293020	0.97	65.59	54.42	55	4176093	0.95	65.43	55.68	55	2330	392	224	118512	1287
2022-10-10	IT1068	50419	2474158	2455968	99.26	4411532	65.61	4391286	1	65.59	72.75	73	4333654	0.98	65.46	73.61	74	1423	265	153	20246	765
2022-10-10	IT1069	140519	2336804	2317631	99.18	4411532	65.61	4380878	0.99	65.59	73.3	74	4304735	0.98	65.41	74.45	74	925	132	119	30654	481
2022-10-10	IT1070	310519	2297554	2281687	99.31	4411532	65.61	4374822	0.99	65.59	68.76	69	4329551	0.98	65.49	69.39	70	1433	273	168	36710	767
2022-10-10	IT1071	140519	2916241	2892447	99.18	4411532	65.61	4388624	0.99	65.58	90.2	92	4335971	0.98	65.45	91.18	92	545	155	64	22908	303
2022-10-10	IT1072	30619	3301506	3243011	98.23	4411532	65.61	4375447	0.99	65.6	97.86	99	4352299	0.99	65.55	98.34	99	1475	374	194	36085	792
2022-10-10	IT1073	310519	2697963	2678615	99.28	4411532	65.61	4374617	0.99	65.59	82.46	84	4328009	0.98	65.47	83.26	84	1470	277	182	36915	791
2022-10-10	IT1074	310519	2450329	2432132	99.26	4411532	65.61	4384621	0.99	65.59	77.43	78	4336649	0.98	65.47	78.17	78	525	112	60	26911	287
2022-10-10	IT1075	140519	3927915	3884968	98.91	4411532	65.61	4386929	0.99	65.56	118.18	121	4352501	0.99	65.47	119.03	121	1435	320	161	24603	781
2022-10-10	IT1077	310519	2971651	2941004	98.97	4411532	65.61	4354208	0.99	65.57	87.42	89	4316833	0.98	65.47	88.1	89	2236	441	270	57324	1210
2022-10-10	IT1078	140519	3837790	3808980	99.25	4411532	65.61	4387166	0.99	65.59	115.37	116	4356637	0.99	65.51	116.11	116	833	84	100	24366	438
2022-10-10	IT1080	310519	2696704	2668587	98.96	4411532	65.61	4383845	0.99	65.58	81.74	83	4314145	0.98	65.45	82.95	83	2139	344	245	27687	1162
2022-10-10	IT1081	310519	3714093	3678586	99.04	4411532	65.61	4319735	0.98	65.62	112.3	114	4270463	0.97	65.53	113.51	115	2479	428	239	91797	1369
2022-10-10	IT1083	310519	3202026	3188341	99.57	4411532	65.61	4399330	1	65.6	99.92	101	4361917	0.99	65.49	100.71	101	558	108	69	12202	318
2022-10-10	IT1084	140519	2805195	2783030	99.21	4411532	65.61	4387759	0.99	65.58	86.15	87	4327516	0.98	65.44	87.22	88	542	82	79	23773	283
2022-10-10	IT1085	310519	4081586	4053079	99.3	4411532	65.61	4388032	0.99	65.61	122.65	125	4359692	0.99	65.53	123.4	126	574	90	79	23500	299
2022-10-10	IT1087	310519	3387270	3353701	99.01	4411532	65.61	4399436	1	65.59	106.59	105	4374008	0.99	65.53	107.14	105	2208	433	282	12096	1193
2022-10-10	IT1088	100719	2368435	2355624	99.46	4411532	65.61	4386965	0.99	65.58	76.19	76	4333761	0.98	65.47	77	76	851	159	112	24567	440
2022-10-10	IT1089	310519	3856404	3825379	99.2	4411532	65.61	4294225	0.97	65.62	121.61	123	4247141	0.96	65.53	122.87	123	2445	593	246	117307	1350
2022-10-10	IT1090	100719	2143941	2130960	99.39	4411532	65.61	4392999	1	65.59	68.65	69	4336190	0.98	65.46	69.42	70	532	195	85	18533	299
2022-10-10	IT1091	30619	2559259	2526821	98.73	4411532	65.61	4391107	1	65.61	78.36	76	4359378	0.99	65.55	78.85	76	979	182	110	20425	493
2022-10-10	IT1092	140519	2155832	2139206	99.23	4411532	65.61	4395249	1	65.57	67.09	68	4317991	0.98	65.4	68.12	68	519	102	58	16283	280
2022-10-10	IT1093	310519	2986553	2963678	99.23	4411532	65.61	4383157	0.99	65.59	88.13	89	4351105	0.99	65.51	88.71	89	553	179	66	28375	306
2022-10-10	IT1094	310519	4433114	4394222	99.12	4411532	65.61	4393686	1	65.6	124.61	127	4377487	0.99	65.56	125.04	127	592	142	80	17846	344
2022-10-10	IT1095	310519	3191644	3143697	98.5	4411532	65.61	4331562	0.98	65.6	100.48	103	4290465	0.97	65.51	101.35	103	2514	498	283	79970	1371
2022-10-10	IT1096	310519	3316082	3286243	99.1	4411532	65.61	4303774	0.98	65.62	98.74	100	4253565	0.96	65.54	99.83	100	2446	573	244	107758	1353
2022-10-10	IT1097	30619	2530216	2505317	99.02	4411532	65.61	4382143	0.99	65.59	77	78	4344552	0.98	65.51	77.6	78	541	101	65	29389	283
2022-10-10	IT1098	30619	3516875	3469628	98.66	4411532	65.61	4399252	1	65.6	104.38	105	4376971	0.99	65.54	104.86	105	847	107	119	12280	441
2022-10-10	IT1099	140519	3294755	3268632	99.21	4411532	65.61	4394042	1	65.58	101.95	103	4349758	0.99	65.47	102.89	104	556	139	67	17490	293
2022-10-10	IT1100	310519	2470424	2449670	99.16	4411532	65.61	4378255	0.99	65.59	77.1	78	4318837	0.98	65.45	78.04	79	952	144	146	33277	485
2022-10-10	IT1101	310519	3665352	3632801	99.11	4411532	65.61	4374303	0.99	65.62	108.57	110	4347271	0.99	65.55	109.19	110	956	239	141	37229	494
2022-10-10	IT1102	50419	1964949	1950927	99.29	4411532	65.61	4370079	0.99	65.61	61.32	62	4299722	0.97	65.46	62.16	62	918	173	108	41453	477
2022-10-10	IT1104	140519	3600128	3573181	99.25	4411532	65.61	4353782	0.99	65.59	110.81	112	4316303	0.98	65.49	111.69	113	889	214	105	57750	472
2022-10-10	IT1105	240419	2573189	2558724	99.44	4411532	65.61	4394771	1	65.58	77.73	78	4337905	0.98	65.45	78.64	79	330	74	16	16761	181
2022-10-10	IT1106	240419	1663977	1648503	99.07	4411532	65.61	4373350	0.99	65.55	52.86	53	4264796	0.97	65.37	53.94	54	821	232	113	38182	435
2022-10-10	IT1107	50419	1678806	1666466	99.26	4411532	65.61	4379897	0.99	65.58	51.38	52	4300951	0.97	65.45	52.14	52	902	192	120	31635	462
2022-10-10	IT1108	240419	1660513	1644593	99.04	4411532	65.61	4387193	0.99	65.56	51.32	52	4286178	0.97	65.39	52.32	52	1004	169	124	24339	503
2022-10-10	IT1111	240419	2022186	2006997	99.25	4411532	65.61	4379814	0.99	65.57	64.26	65	4285546	0.97	65.4	65.45	66	548	74	45	31718	286
2022-10-10	IT1112	240419	3009832	2983629	99.13	4411532	65.61	4385686	0.99	65.59	90.44	91	4342232	0.98	65.49	91.26	91	859	244	116	25846	456
2022-10-10	IT1113	50419	2055535	2039463	99.22	4411532	65.61	4376255	0.99	65.59	63.6	64	4298048	0.97	65.42	64.6	65	928	156	111	35277	472
2022-10-10	IT1114	140519	1959722	1941986	99.09	4411532	65.61	4389611	1	65.59	62.93	63	4325451	0.98	65.45	63.73	63	576	120	75	21921	307
2022-10-10	IT1115	140519	2915319	2883602	98.91	4411532	65.61	4399081	1	65.59	87.93	89	4332822	0.98	65.45	89.16	90	828	147	125	12451	421
2022-10-10	IT1116	140519	2531548	2509514	99.13	4411532	65.61	4376474	0.99	65.58	80.34	81	4302547	0.98	65.41	81.57	82	934	125	126	35058	481
2022-10-10	IT1117	140519	2542909	2517083	98.98	4411532	65.61	4383594	0.99	65.57	80.14	81	4311031	0.98	65.41	81.34	82	885	162	132	27938	444
2022-10-10	IT1119	30619	3297731	3270092	99.16	4411532	65.61	4375714	0.99	65.59	103.35	105	4329838	0.98	65.48	104.36	105	552	83	54	35818	293
2022-10-10	IT1120	140519	3412667	3376672	98.95	4411532	65.61	4326628	0.98	65.59	106.53	109	4262628	0.97	65.47	108	109	2457	464	228	84904	1334
2022-10-10	IT1121	140519	3280294	3251336	99.12	4411532	65.61	4375286	0.99	65.57	103.68	106	4315133	0.98	65.43	105	106	842	247	81	36246	434
2022-10-10	IT1122	140519	2318452	2290785	98.81	4411532	65.61	4377300	0.99	65.56	73.06	74	4299559	0.97	65.38	74.23	74	2076	297	207	34232	1125
2022-10-10	IT1123	310519	3086273	3060389	99.16	4411532	65.61	4384510	0.99	65.6	94.39	95	4342840	0.98	65.5	95.22	96	956	209	138	27022	492
2022-10-10	IT1125	140519	2153826	2130843	98.93	4411532	65.61	4382780	0.99	65.58	67.85	69	4300814	0.97	65.42	68.97	69	934	231	111	28752	484
2022-10-10	IT1126	310519	1946983	1930714	99.16	4411532	65.61	4387303	0.99	65.6	58.44	59	4323515	0.98	65.46	59.19	59	948	140	134	24229	489
2022-10-10	IT1127	30619	2230486	2212843	99.21	4411532	65.61	4385332	0.99	65.59	69.37	70	4328346	0.98	65.48	70.18	70	853	255	95	26200	441
2022-10-10	IT1128	140519	2257556	2236661	99.07	4411532	65.61	4382221	0.99	65.57	68.87	70	4310032	0.98	65.42	69.89	70	846	202	116	29311	447
2022-10-10	IT1130	140519	2829853	2804215	99.09	4411532	65.61	4389893	1	65.58	87.36	89	4334018	0.98	65.44	88.37	89	1444	192	139	21639	765
2022-10-10	IT1131	140519	2508272	2488198	99.2	4411532	65.61	4384833	0.99	65.58	77.58	79	4321668	0.98	65.44	78.6	79	513	93	76	26699	281
2022-10-10	IT1132	310519	3515181	3484763	99.13	4411532	65.61	4382462	0.99	65.61	103.88	106	4357958	0.99	65.55	104.42	107	972	177	151	29070	496
2022-10-10	IT1133	140519	3107700	3079751	99.1	4411532	65.61	4386594	0.99	65.59	97.17	99	4330576	0.98	65.45	98.32	99	955	153	117	24938	488
2022-10-10	IT1134	310519	3378016	3356059	99.35	4411532	65.61	4346261	0.99	65.6	105.5	108	4309234	0.98	65.52	106.34	108	869	220	101	65271	455
2022-10-10	IT1135	140519	2018821	2003807	99.26	4411532	65.61	4378704	0.99	65.57	63.51	64	4290762	0.97	65.39	64.63	65	832	212	102	32828	442
2022-10-10	IT1136	140519	1758445	1742586	99.1	4411532	65.61	4375728	0.99	65.57	55.19	56	4282338	0.97	65.39	56.2	56	915	121	113	35804	468
2022-10-10	IT1138	240419	5040718	4935286	97.91	4411532	65.61	4401144	1	65.61	139.21	143	4383153	0.99	65.56	139.75	143	581	85	43	10388	334
2022-10-10	IT1139	50419	2028676	2014925	99.32	4411532	65.61	4387270	0.99	65.6	61.01	62	4333377	0.98	65.49	61.65	62	922	151	118	24262	474
2022-10-10	IT1140	30619	1563528	1464448	93.66	4411532	65.61	4373760	0.99	65.6	45.47	45	4328931	0.98	65.55	45.86	45	975	194	111	37772	495
2022-10-10	IT1141	140519	3324982	3281341	98.69	4411532	65.61	4399118	1	65.59	100.03	102	4356990	0.99	65.48	100.91	102	1402	259	128	12414	730
2022-10-10	IT1142	140519	3374373	3329132	98.66	4411532	65.61	4384033	0.99	65.59	101.65	104	4343999	0.98	65.49	102.5	104	843	106	101	27499	444
2022-10-10	IT1143	140519	2672870	2647484	99.05	4411532	65.61	4381865	0.99	65.59	84.57	86	4312959	0.98	65.44	85.78	86	914	125	137	29667	471
2022-10-10	IT1145	50419	2217754	2209343	99.62	4411532	65.61	4384403	0.99	65.57	67.3	68	4320041	0.98	65.42	68.17	68	353	74	29	27129	185
2022-10-10	IT1148	50319	2959468	2934623	99.16	4411532	65.61	4371748	0.99	65.59	85.93	87	4321764	0.98	65.47	86.84	87	1355	328	166	39784	719
2022-10-10	IT1149	50319	3766073	3735788	99.2	4411532	65.61	4397685	1	65.6	102.5	104	4372081	0.99	65.53	103.05	105	542	141	53	13847	289
2022-10-10	IT1150	50319	2796519	2774492	99.21	4411532	65.61	4380771	0.99	65.57	81.32	82	4330710	0.98	65.45	82.17	82	542	118	71	30761	296
2022-10-10	IT1161	50419	3294470	3263955	99.07	4411532	65.61	4384182	0.99	65.6	100.94	102	4353416	0.99	65.53	101.59	102	896	225	103	27350	486
2022-10-10	IT1245	50521	2778773	2746661	98.84	4411532	65.61	4386278	0.99	65.58	83.44	84	4328892	0.98	65.47	84.41	85	525	130	64	25254	285
2022-10-10	IT1246	200919	2714560	2694053	99.24	4411532	65.61	4355735	0.99	65.61	81.9	83	4328972	0.98	65.54	82.35	83	884	197	107	55797	468
2022-10-10	IT1247	200919	2049317	2024842	98.81	4411532	65.61	4355090	0.99	65.6	63.61	64	4312861	0.98	65.51	64.14	64	909	224	113	56442	484
2022-10-10	IT1248	200919	2933788	2915149	99.36	4411532	65.61	4400972	1	65.6	89.02	90	4369939	0.99	65.52	89.59	90	561	104	60	10560	327
2022-10-10	IT1249	200919	1826991	1816392	99.42	4411532	65.61	4399605	1	65.59	56.31	57	4341768	0.98	65.47	56.95	57	534	145	63	11927	285
2022-10-10	IT1250	200919	2038925	2004491	98.31	4411532	65.61	4364594	0.99	65.59	60.79	61	4303035	0.98	65.45	61.55	61	1411	236	148	46938	759
2022-10-10	IT1251	200919	2530225	2511343	99.25	4411532	65.61	4383047	0.99	65.6	78.88	80	4334525	0.98	65.49	79.66	80	953	157	111	28485	495
2022-10-10	IT1252	200919	3839474	3800106	98.97	4411532	65.61	4357241	0.99	65.58	110.82	112	4331923	0.98	65.52	111.41	112	2250	523	258	54291	1230
2022-10-10	IT1253	200919	3014936	2995637	99.36	4411532	65.61	4374003	0.99	65.6	93.49	95	4335987	0.98	65.51	94.23	95	1424	304	160	37529	762
2022-10-10	IT1254	200919	3130558	3111222	99.38	4411532	65.61	4396085	1	65.6	94.09	95	4371199	0.99	65.53	94.58	95	789	165	107	15447	409
2022-10-10	IT1255	200919	3537605	3509612	99.21	4411532	65.61	4384012	0.99	65.58	104.03	105	4366973	0.99	65.53	104.4	105	604	155	82	27520	314
2022-10-10	IT1256	200919	4252527	4223013	99.31	4411532	65.61	4387579	0.99	65.6	127.52	130	4360581	0.99	65.52	128.26	131	878	310	79	23953	465
2022-10-10	IT1257	200919	2996196	2954952	98.62	4411532	65.61	4387727	0.99	65.58	92.24	92	4336754	0.98	65.45	93.23	92	842	135	119	23805	433
2022-10-10	IT1258	200919	3688156	3661528	99.28	4411532	65.61	4383663	0.99	65.6	109.09	111	4360990	0.99	65.53	109.62	111	828	280	117	27869	434
2022-10-10	IT1259	200919	2688844	2657108	98.82	4411532	65.61	4376475	0.99	65.59	81.14	82	4318955	0.98	65.5	82.12	83	2185	342	217	35057	1179
2022-10-10	IT1260	200919	2479307	2459937	99.22	4411532	65.61	4361504	0.99	65.57	77.64	79	4314644	0.98	65.48	78.39	79	929	124	130	50028	473
2022-10-10	IT1261	200919	3340112	3314360	99.23	4411532	65.61	4393115	1	65.59	103.3	105	4359444	0.99	65.51	104.03	105	530	201	52	18417	302
2022-10-10	IT1262	200919	3266954	3242926	99.26	4411532	65.61	4392821	1	65.6	101.08	103	4357016	0.99	65.5	101.84	103	560	81	74	18711	294
2022-10-10	IT1263	200919	2594324	2563581	98.81	4411532	65.61	4370159	0.99	65.57	81.06	82	4323291	0.98	65.46	81.85	82	931	145	136	41373	481
2022-10-10	IT1264	200919	2737599	2707891	98.91	4411532	65.61	4391345	1	65.61	83.41	85	4348620	0.99	65.51	84.14	85	949	136	114	20187	500
2022-10-10	IT1265	200919	3040445	3017048	99.23	4411532	65.61	4391788	1	65.6	93.03	94	4360927	0.99	65.53	93.62	94	526	113	73	19744	289
2022-10-10	IT1266	200919	4175264	3711612	88.9	4411532	65.61	4395172	1	65.6	106.4	105	4378152	0.99	65.56	106.78	105	2202	459	270	16360	1183
2022-10-10	IT1267	200919	2485935	2465165	99.16	4411532	65.61	4379282	0.99	65.61	75.41	76	4341087	0.98	65.52	75.99	76	940	162	109	32250	493
2022-10-10	IT1268	200919	2916741	2885814	98.94	4411532	65.61	4384087	0.99	65.59	88.4	90	4353707	0.99	65.52	88.95	90	2167	356	213	27445	1171
2022-10-10	IT1269	200919	3649931	3624653	99.31	4411532	65.61	4384581	0.99	65.59	112.19	114	4355339	0.99	65.52	112.89	115	859	201	103	26951	445
2022-10-10	IT1270	200919	2470111	2450769	99.22	4411532	65.61	4372845	0.99	65.59	74.02	75	4336511	0.98	65.51	74.57	75	1443	253	178	38687	778
2022-10-10	IT1271	200919	2065950	2052033	99.33	4411532	65.61	4378726	0.99	65.58	61.33	61	4343990	0.98	65.51	61.76	62	558	82	50	32806	316
2022-10-10	IT1272	200919	3114460	3087303	99.13	4411532	65.61	4394795	1	65.6	92.14	93	4367730	0.99	65.53	92.66	94	1408	432	165	16737	746
2022-10-10	IT1273	200919	2916629	2830190	97.04	4411532	65.61	4390998	1	65.59	84.56	85	4346398	0.99	65.47	85.35	85	2180	330	245	20534	1177
2022-10-10	IT1274	200919	3032322	3009355	99.24	4411532	65.61	4371347	0.99	65.61	92.96	94	4330401	0.98	65.51	93.76	95	929	179	119	40185	486
2022-10-10	IT1275	200919	3188283	3165092	99.27	4411532	65.61	4397752	1	65.61	94.93	97	4363777	0.99	65.52	95.6	97	532	81	69	13780	298
2022-10-10	IT1276	200919	2635496	2614926	99.22	4411532	65.61	4375390	0.99	65.6	77.41	78	4340281	0.98	65.52	77.97	78	1387	272	193	36142	734
2022-10-10	IT1277	200919	3747449	3662445	97.73	4411532	65.61	4385219	0.99	65.6	113.44	116	4348471	0.99	65.5	114.33	116	890	295	128	26313	480
2022-10-10	IT1278	200919	2357988	2345385	99.47	4411532	65.61	4395738	1	65.6	70.37	71	4357141	0.99	65.51	70.93	71	570	144	63	15794	322
2022-10-10	IT1279	200919	2773645	2745372	98.98	4411532	65.61	4394907	1	65.6	82.27	83	4365336	0.99	65.53	82.76	83	1414	319	157	16625	752
2022-10-10	IT1280	200919	2647924	2624996	99.13	4411532	65.61	4392914	1	65.61	79.56	81	4361959	0.99	65.54	80.06	81	962	136	145	18618	496
2022-10-10	IT1281	200919	2533254	2518062	99.4	4411532	65.61	4398237	1	65.6	77.24	78	4361331	0.99	65.51	77.82	78	564	184	54	13295	302
2022-10-10	IT1282	200919	3608513	3573787	99.04	4411532	65.61	4358132	0.99	65.58	108.8	111	4324829	0.98	65.5	109.57	111	2296	408	254	53400	1228
2022-10-10	IT1283	270919	3368272	3317473	98.49	4411532	65.61	4388649	0.99	65.59	106.33	108	4345054	0.98	65.47	107.31	108	1457	301	185	22883	783
2022-10-10	IT1284	200919	2429043	2409890	99.21	4411532	65.61	4397768	1	65.6	74.22	75	4356011	0.99	65.51	74.85	75	1425	317	184	13764	764
2022-10-10	IT1286	200919	1784113	1750904	98.14	4411532	65.61	4384925	0.99	65.58	54.48	55	4325457	0.98	65.46	55.11	55	2104	266	224	26607	1129
2022-10-10	IT1288	200919	2048247	2023946	98.81	4411532	65.61	4385715	0.99	65.59	60.9	61	4339717	0.98	65.5	61.46	61	964	203	135	25817	495
2022-10-10	IT1291	200919	2120211	1532080	72.26	4411532	65.61	4377698	0.99	65.59	47.56	48	4294983	0.97	65.43	48.32	48	924	150	148	33834	471
2022-10-10	IT1292	200919	1895757	1876207	98.97	4411532	65.61	4375193	0.99	65.58	58.04	58	4312405	0.98	65.45	58.76	59	913	130	118	36339	461
2022-10-10	IT1293	200919	2403201	2381712	99.11	4411532	65.61	4371684	0.99	65.59	71.81	72	4327253	0.98	65.49	72.47	73	1434	263	160	39848	776
2022-10-10	IT1294	200919	2907592	2885261	99.23	4411532	65.61	4371482	0.99	65.59	90.91	92	4322277	0.98	65.47	91.85	93	846	137	86	40050	438
2022-10-10	IT1295	200919	2834745	2804979	98.95	4411532	65.61	4382618	0.99	65.58	88.95	90	4335212	0.98	65.47	89.82	90	2150	432	236	28914	1171
2022-10-10	IT1296	200919	3209238	3180676	99.11	4411532	65.61	4381300	0.99	65.6	100.41	102	4341981	0.98	65.5	101.24	102	972	169	134	30232	496
2022-10-10	IT1297	200919	3495207	3465065	99.14	4411532	65.61	4383818	0.99	65.6	108.31	110	4350718	0.99	65.52	109.07	110	866	202	111	27714	469
[truncated: 718 more rows]
